# Supplementary material for: Mechanistic investigation of Rh(i)-catalyzed alkyne–isatin decarbonylative coupling
Source: Royal Society of Chemistry journal article supplement (doi:10.1039/c7qo00122c), 2017-01-01
Supplement: c7qo00122c1.pdf [file c7qo00122c1.pdf]

## *Supporting Information*

### **Mechanistic Investigation of Rh(I)-Catalyzed Alkyne–Isatin Decarbonylative Coupling**

Jiaojiao Deng, Xiuling Wen and Juan Li\*

Department of Chemistry, Jinan University, Huangpu Road West 601, Guangzhou,  
Guangdong 510632, P. R. China

\*Corresponding authors. Email: tchjli@jnu.edu.cn (J. Li)

#### **Table of Contents**

|                                                                                  |            |
|----------------------------------------------------------------------------------|------------|
| <b>1. Table S1.....</b>                                                          | <b>S2</b>  |
| <b>2. Schemes S1-S9 (Other possible pathways).....</b>                           | <b>S2</b>  |
| <b>3. Table of energy values.....</b>                                            | <b>S7</b>  |
| <b>4. Calculated imaginary frequencies of all transition states species.....</b> | <b>S11</b> |
| <b>5. Cartesian coordinates.....</b>                                             | <b>S13</b> |

**1. Table S1.** Calculation results by different methods (M06, B3LYP and PBE0)<sup>a</sup>

|       | Me <sub>A1</sub> | Me <sub>TS<sub>A1-B</sub></sub> | Me <sub>B</sub> | Me <sub>B1</sub> | Me <sub>TS<sub>B1-C</sub></sub> | Me <sub>C</sub> | Me <sub>TS<sub>C2-D</sub></sub> | Me <sub>A1'</sub> | Me <sub>TS<sub>A1'-B'</sub></sub> | Me <sub>B'</sub> | Me <sub>C'</sub> | Me <sub>C1'</sub> | Me <sub>TS<sub>C1'-D'</sub></sub> |
|-------|------------------|---------------------------------|-----------------|------------------|---------------------------------|-----------------|---------------------------------|-------------------|-----------------------------------|------------------|------------------|-------------------|-----------------------------------|
| M06   | 0.8              | 7.9                             | 0.4             | 12.8             | 22.1                            | -7.8            | 20.9                            | 3.1               | 16.1                              | 14.4             | 21.1             | 28.2              | 27.4                              |
| B3LYP | 15.0             | 21.7                            | 10.6            | 19.0             | 30.3                            | 2.0             | 25.7                            | 17.6              | 23.1                              | 16.8             | 24.3             | 51.0              | 50.1                              |
| PBE0  | 13.9             | 19.3                            | 9.9             | 19.0             | 31.4                            | 2.4             | 25.7                            | 16.3              | 22.1                              | 16.8             | 23.4             | 39.5              | 39.5                              |

<sup>a</sup>All of the values are solvent-corrected free energies in kcal/mol.

**2. Schemes S1-S9 (Other possible pathways):**

**Scheme S1.** Other possible decarbonylation step<sup>a</sup>

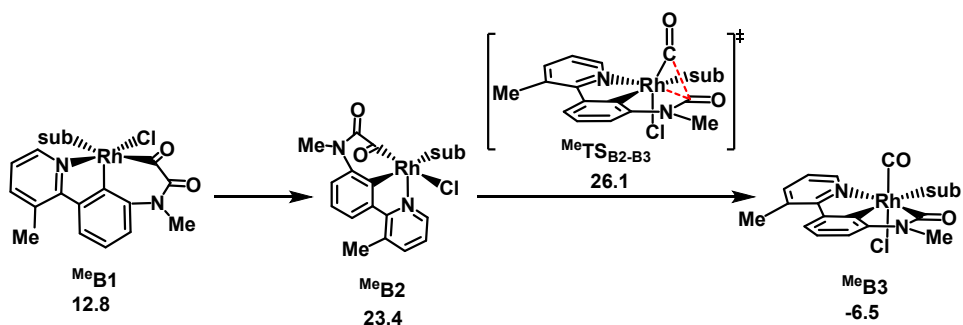

<sup>a</sup>All of the values are solvent-corrected free energies in kcal/mol.

**Scheme S2.** Possible pathways of acyl migratory insertion<sup>a</sup>

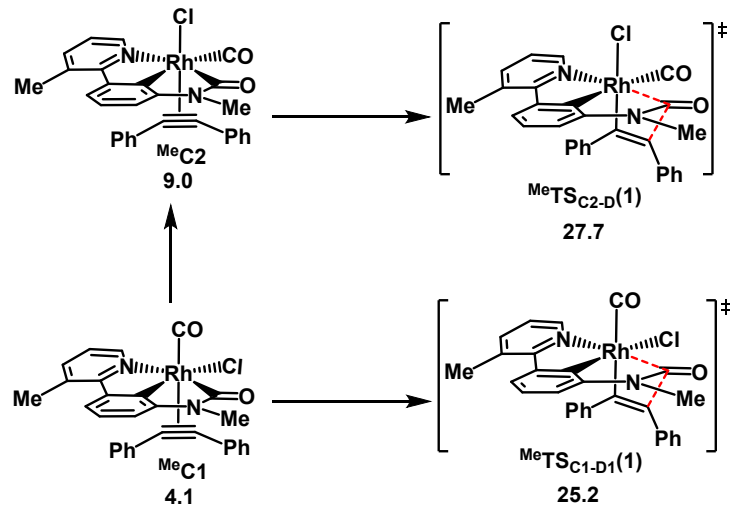

<sup>a</sup>All of the values are solvent-corrected free energies in kcal/mol.

**Scheme S3.** Other possible transition states for alkyne insertion<sup>a</sup>

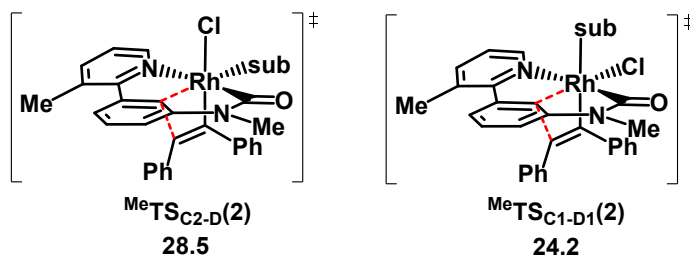

<sup>a</sup>All of the values are solvent-corrected free energies in kcal/mol.

**Scheme S4.** Alkyne migratory insertion precedes decarbonylation step<sup>a</sup>

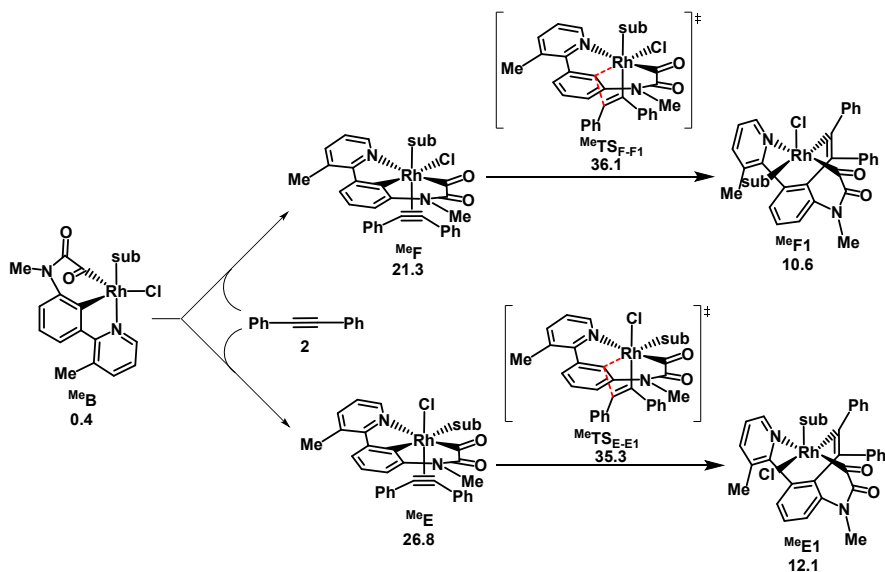

<sup>a</sup>All of the values are solvent-corrected free energies in kcal/mol.

**Scheme S5.** Other possible transition states about C–H activation<sup>a</sup>

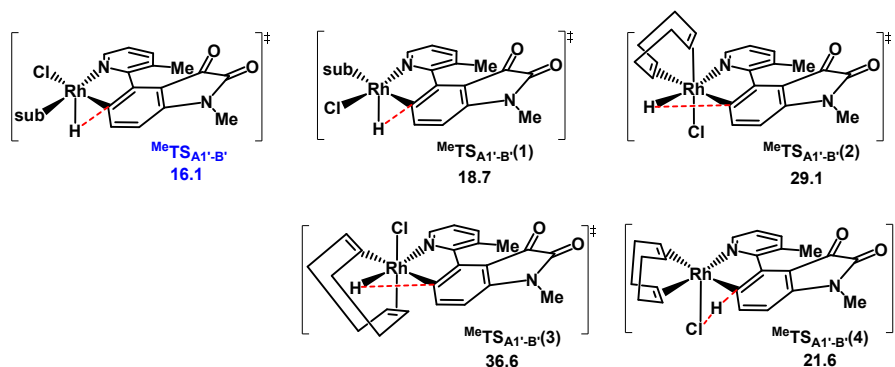

<sup>a</sup>All of the values are solvent-corrected free energies in kcal/mol.

Scheme S6. Isomers of  $\text{MeC}^{\beta\text{a}}$

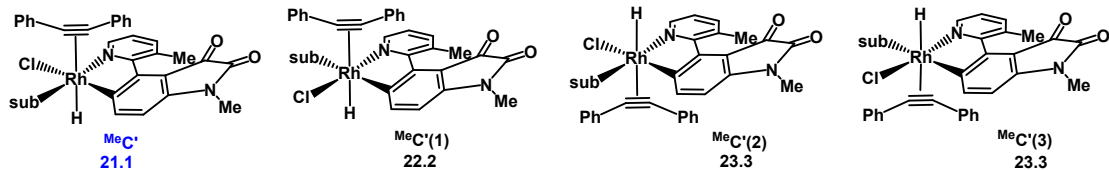

<sup>a</sup>All of the values are solvent-corrected free energies in kcal/mol.

Scheme S7. Isomers of  $\text{MeC1}^{\beta\text{a}}$

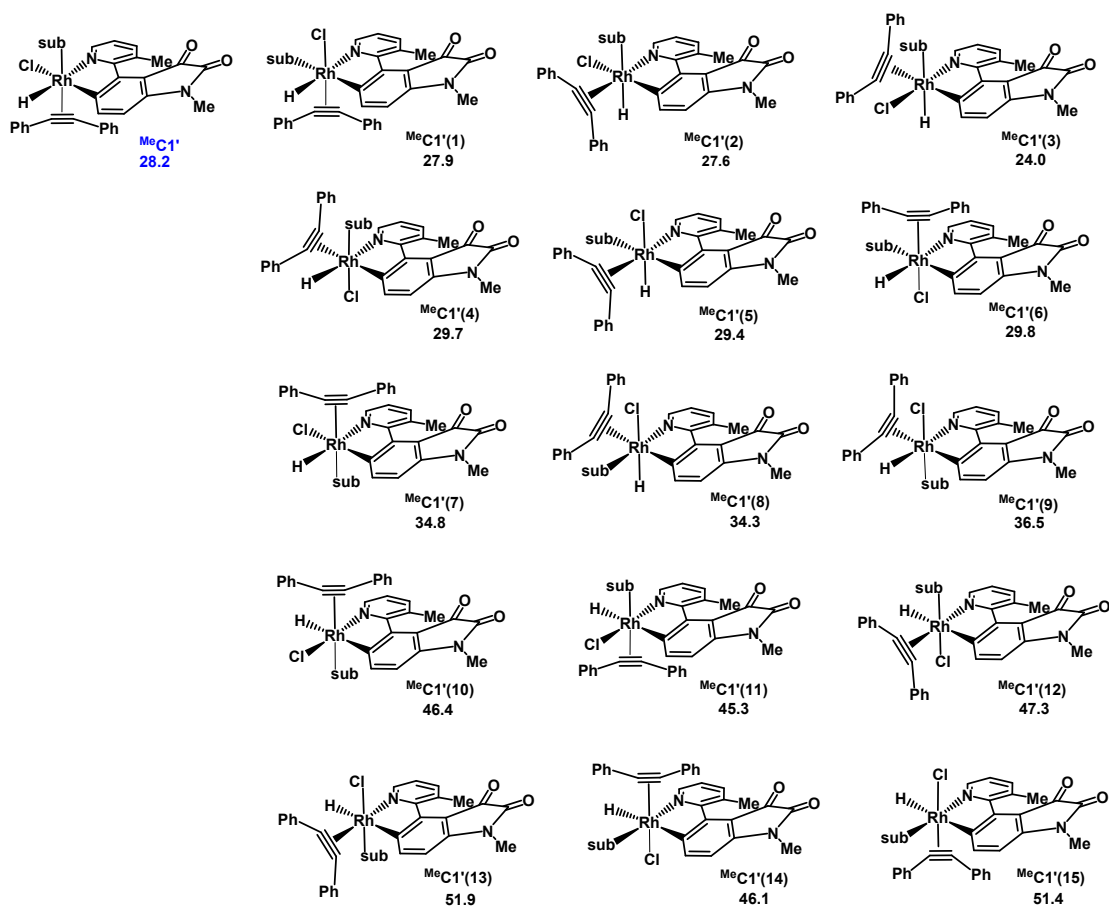

<sup>a</sup>All of the values are solvent-corrected free energies in kcal/mol.

**Scheme S8.** Isomers of  $\text{Me}^{\text{TS}}_{\text{C1-D}}$ ,<sup>a</sup>

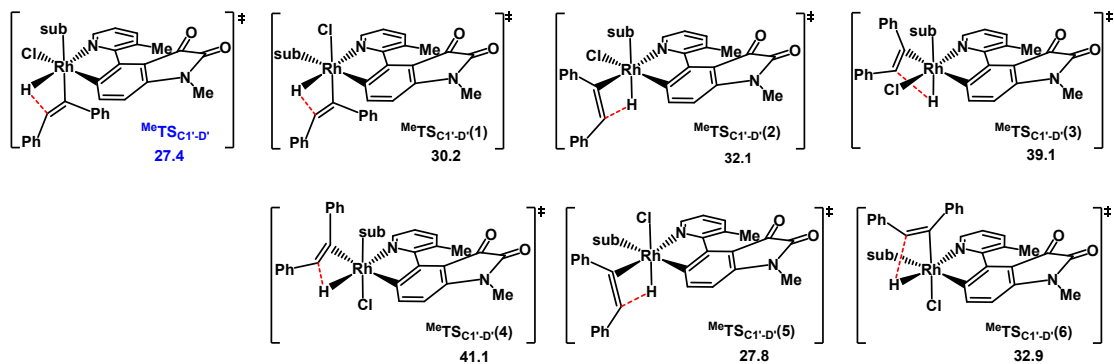

<sup>a</sup>All of the values are solvent-corrected free energies in kcal/mol.

**Scheme S9.** Other possible transition states about alkynes migratory insertion using Wilkinson's catalyst<sup>a</sup>

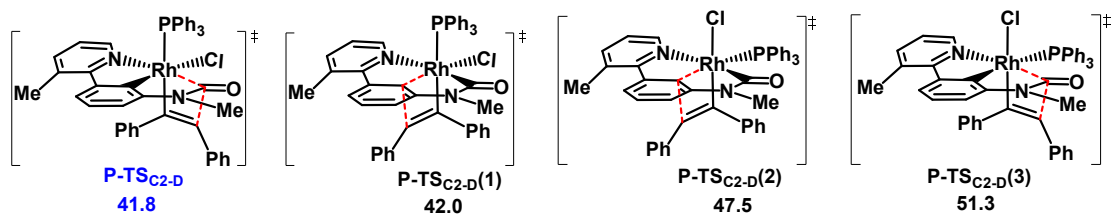

<sup>a</sup>All of the values are solvent-corrected free energies in kcal/mol.

### 3. Table of energy values

**Table S2.** Energies (in Hartree) for the related TSs and intermediates.

| Species                | $E_0$        | $E$          | $H_{433}$    | $G_{433}$    | $E_{(sol, M06)}$ |
|------------------------|--------------|--------------|--------------|--------------|------------------|
| 1                      | -837.958241  | -837.942525  | -837.941581  | -838.001292  | -838.4307408     |
| 2                      | -538.821452  | -538.810224  | -538.809280  | -538.861282  | -539.1598141     |
| 3                      | -1263.594803 | -1263.570119 | -1263.569175 | -1263.649039 | -1264.3589266    |
| 4                      | -1376.835682 | -1376.808152 | -1376.807208 | -1376.894891 | -1377.6430081    |
| CO                     | -113.243564  | -113.241204  | -113.240259  | -113.262702  | -113.2862799     |
| cod                    | -311.581462  | -311.573993  | -311.573048  | -311.613211  | -311.8548235     |
| A                      | -881.330817  | -881.320959  | -881.320015  | -881.366553  | -882.697262      |
| MeA1                   | -2245.687256 | -2245.650435 | -2245.649491 | -2245.756527 | -2247.723607     |
| MeTS <sub>A1-B</sub>   | -2245.687765 | -2245.653009 | -2245.652065 | -2245.750890 | -2247.719427     |
| MeB                    | -2245.695467 | -2245.659861 | -2245.658917 | -2245.761160 | -2247.729157     |
| MeB1                   | -2245.673538 | -2245.638283 | -2245.637339 | -2245.737985 | -2247.711353     |
| MeTS <sub>B1-C</sub>   | -2245.659336 | -2245.624054 | -2245.623110 | -2245.724071 | -2247.693702     |
| MeC                    | -2245.708385 | -2245.672576 | -2245.671632 | -2245.773552 | -2247.742116     |
| MeC1                   | -1946.552129 | -1946.520842 | -1946.519897 | -1946.612900 | -1948.4529979    |
| MeTS <sub>C1-D1</sub>  | -1946.521781 | -1946.490460 | -1946.489516 | -1946.584649 | -1948.4181408    |
| MeD1                   | -1946.544227 | -1946.512462 | -1946.511518 | -1946.607499 | -1948.4433735    |
| MeC2                   | -1946.541675 | -1946.509909 | -1946.508965 | -1946.603592 | -1948.4428519    |
| MeTS <sub>C2-D</sub>   | -1946.524146 | -1946.492925 | -1946.491981 | -1946.586630 | -1948.4222062    |
| MeD                    | -1946.556604 | -1946.525019 | -1946.524075 | -1946.620701 | -1948.4564571    |
| MeD2                   | -1946.563446 | -1946.531969 | -1946.531025 | -1946.626846 | -1948.4607274    |
| MeTS <sub>D2-A</sub>   | -1946.561039 | -1946.530316 | -1946.529372 | -1946.622829 | -1948.4560419    |
| MeA1'                  | -2245.698743 | -2245.663477 | -2245.662533 | -2245.762969 | -2247.7274358    |
| MeTS <sub>A1'</sub>    | -2245.653174 | -2245.618225 | -2245.617281 | -2245.718330 | -2247.6779399    |
| MeTS <sub>A1'-B'</sub> | -2245.672638 | -2245.637787 | -2245.636843 | -2245.736735 | -2247.7022636    |
| MeB'                   | -2245.676458 | -2245.641780 | -2245.640835 | -2245.739508 | -2247.7086129    |
| MeC'                   | -2784.503590 | -2784.455052 | -2784.454108 | -2784.587762 | -2786.8768131    |
| MeC1'                  | -2784.506312 | -2784.459625 | -2784.458681 | -2784.583274 | -2786.8746138    |
| MeTS <sub>C1'-D'</sub> | -2784.506254 | -2784.459878 | -2784.458934 | -2784.583436 | -2786.8737955    |
| MeD'                   | -2784.514499 | -2784.466468 | -2784.465524 | -2784.597095 | -2786.8897595    |
| MeD1'                  | -2784.548316 | -2784.500782 | -2784.499838 | -2784.629870 | -2786.9147296    |
| MeTS <sub>D1'-A</sub>  | -2784.534661 | -2784.488303 | -2784.487359 | -2784.612378 | -2786.9002232    |
| PPh3                   | -1035.418891 | -1035.402991 | -1035.402047 | -1035.465680 | -1035.9070264    |
| P-C1                   | -3365.379226 | -3365.328541 | -3365.327597 | -3365.463112 | -3367.8728499    |
| P-C2                   | -2868.748684 | -2868.702665 | -2868.701721 | -2868.826716 | -2871.0919575    |
| P-TS <sub>C2-D</sub>   | -2868.714806 | -2868.669407 | -2868.668463 | -2868.793405 | -2871.0555015    |

|                                           |              |              |              |              |               |
|-------------------------------------------|--------------|--------------|--------------|--------------|---------------|
| <b>P-D</b>                                | -2868.749400 | -2868.704128 | -2868.703184 | -2868.827862 | -2871.0986165 |
| <b>2a</b>                                 | -391.250582  | -391.237819  | -391.236875  | -391.290006  | -391.6284426  |
| <b>2b</b>                                 | -422.455975  | -422.446765  | -422.445821  | -422.491414  | -422.7319175  |
| <b>2c</b>                                 | -460.544052  | -460.533937  | -460.532993  | -460.580959  | -460.8269598  |
| <b>2A</b>                                 | -1798.977003 | -1798.942958 | -1798.942014 | -1799.045924 | -1800.9147167 |
| <b>TS<sub>2A</sub></b>                    | -1798.950927 | -1798.917571 | -1798.916627 | -1799.018499 | -1800.8878239 |
| <b>2A'</b>                                | -1798.967773 | -1798.934210 | -1798.933266 | -1799.034651 | -1800.9050372 |
| <b>TS<sub>2A'</sub></b>                   | -1798.950735 | -1798.917791 | -1798.916847 | -1799.017086 | -1800.8875584 |
| <b>2B</b>                                 | -1830.195207 | -1830.165937 | -1830.164992 | -1830.254368 | -1832.0295279 |
| <b>TS<sub>2B</sub></b>                    | -1830.168080 | -1830.139062 | -1830.138118 | -1830.227892 | -1832.0007694 |
| <b>2B'</b>                                | -1830.175327 | -1830.145173 | -1830.144229 | -1830.237122 | -1832.00939   |
| <b>TS<sub>2B'</sub></b>                   | -1830.161287 | -1830.132191 | -1830.131246 | -1830.221644 | -1831.9945273 |
| <b>2C</b>                                 | -1868.277213 | -1868.246681 | -1868.245737 | -1868.337519 | -1870.1184452 |
| <b>TS<sub>2C</sub></b>                    | -1868.248310 | -1868.218025 | -1868.217081 | -1868.311630 | -1870.0928226 |
| <b>2C'</b>                                | -1868.272126 | -1868.241263 | -1868.240319 | -1868.334211 | -1870.1126222 |
| <b>TS<sub>2C'</sub></b>                   | -1868.250293 | -1868.220044 | -1868.219100 | -1868.312237 | -1870.0888106 |
| <b>NoDG<sub>I</sub></b>                   | -551.862705  | -551.853133  | -551.852189  | -551.897584  | -552.1653272  |
| <b>NoDG<sub>A</sub></b>                   | -1433.231162 | -1433.210143 | -1433.209199 | -1433.282056 | -1434.8921256 |
| <b>NoDG<sub>A</sub>I</b>                  | -1433.234085 | -1433.213001 | -1433.212057 | -1433.284819 | -1434.8895752 |
| <b>NoDG<sub>TS<sub>A</sub>I-B</sub></b>   | -1433.182276 | -1433.161562 | -1433.160618 | -1433.230758 | -1434.8377073 |
| <b>NoDG<sub>B</sub></b>                   | -1433.213966 | -1433.192851 | -1433.191907 | -1433.263891 | -1434.8725403 |
| <b>NoDG<sub>TS<sub>A</sub>-C</sub></b>    | -1433.175448 | -1433.155010 | -1433.154065 | -1433.222880 | -1434.8366226 |
| <b>NoDG<sub>C</sub></b>                   | -1433.187008 | -1433.165933 | -1433.164989 | -1433.235545 | -1434.8493491 |
| <b>Me<sub>TS<sub>A</sub>I-B</sub>(1)</b>  | -2245.666295 | -2245.630987 | -2245.630043 | -2245.731842 | -2247.7056392 |
| <b>Me<sub>TS<sub>A</sub>I-B</sub>(2)</b>  | -1946.530410 | -1946.500026 | -1946.499082 | -1946.591421 | -1948.4318066 |
| <b>Me<sub>TS<sub>A</sub>I-B</sub>(3)</b>  | -1719.284335 | -1719.257677 | -1719.256733 | -1719.339453 | -1721.117552  |
| <b>Me<sub>TS<sub>A</sub>I-B</sub>(4)</b>  | -1719.277261 | -1719.250928 | -1719.249984 | -1719.331165 | -1721.1146072 |
| <b>Me<sub>TS<sub>A</sub>I-B</sub>(5)</b>  | -1719.275163 | -1719.248758 | -1719.247814 | -1719.329072 | -1721.1118109 |
| <b>Me<sub>TS<sub>A</sub>I-B</sub>(6)</b>  | -1719.273567 | -1719.247625 | -1719.246681 | -1719.326574 | -1721.1115411 |
| <b>Me<sub>TS<sub>A</sub>I-B</sub>(7)</b>  | -1719.266340 | -1719.239803 | -1719.238859 | -1719.320882 | -1721.1004465 |
| <b>Me<sub>TS<sub>A</sub>I-B</sub>(8)</b>  | -1719.284145 | -1719.257253 | -1719.256309 | -1719.339985 | -1721.108642  |
| <b>Me<sub>TS<sub>A</sub>I-B</sub>(9)</b>  | -1719.264628 | -1719.237452 | -1719.236507 | -1719.321764 | -1721.0952468 |
| <b>Me<sub>TS<sub>A</sub>I-B</sub>(10)</b> | -3083.623373 | -3083.571211 | -3083.570267 | -3083.706843 | -3086.1275386 |
| <b>Me<sub>TS<sub>A</sub>I-B</sub>(11)</b> | -2557.249017 | -2557.204967 | -2557.204023 | -2557.323957 | -2559.5480785 |
| <b>Me<sub>TS<sub>A</sub>I-B</sub>(12)</b> | -2557.240000 | -2557.195426 | -2557.194481 | -2557.317083 | -2559.5388326 |
| <b>Me<sub>TS<sub>A</sub>I-B</sub>(13)</b> | -3083.619107 | -3083.566942 | -3083.565998 | -3083.702439 | -3086.1169261 |
| <b>Me<sub>TS<sub>A</sub>I-B</sub>(14)</b> | -2245.636190 | -2245.599996 | -2245.599052 | -2245.702854 | -2247.6590165 |
| <b>Me<sub>TS<sub>A</sub>I-B</sub>(15)</b> | -2258.103719 | -2258.064211 | -2258.063267 | -2258.174195 | -2260.2643568 |
| <b>Me<sub>TS<sub>A</sub>I-B</sub>(16)</b> | -2485.342640 | -2485.299167 | -2485.298223 | -2485.417950 | -2487.5691072 |
| <b>Me<sub>TS<sub>A</sub>I-B</sub>(17)</b> | -1719.235542 | -1719.207860 | -1719.206916 | -1719.292972 | -1721.0726107 |



|                           |              |              |              |              |               |
|---------------------------|--------------|--------------|--------------|--------------|---------------|
| MeB2                      | -2245.654973 | -2245.618979 | -2245.618035 | -2245.721757 | -2247.6907099 |
| MeTS <sub>B2-B3</sub>     | -2245.648394 | -2245.612248 | -2245.611303 | -2245.716127 | -2247.683451  |
| MeB3                      | -2245.701493 | -2245.664741 | -2245.663797 | -2245.771032 | -2247.734603  |
| MeTS <sub>C2-D</sub> (1)  | -1946.510173 | -1946.478859 | -1946.477915 | -1946.573542 | -1948.4105795 |
| MeTS <sub>C2-D</sub> (2)  | -2671.237897 | -2671.192088 | -2671.191144 | -2671.316031 | -2673.5612517 |
| MeTS <sub>C1-D1</sub> (1) | -1946.519208 | -1946.488384 | -1946.487440 | -1946.580449 | -1948.4174873 |
| MeTS <sub>C1-D1</sub> (2) | -2671.247277 | -2671.201988 | -2671.201044 | -2671.323926 | -2673.5698816 |
| MeE                       | -2784.504749 | -2784.457255 | -2784.456310 | -2784.584740 | -2786.8755206 |
| MeTS <sub>E-E1</sub>      | -2784.487531 | -2784.439836 | -2784.438892 | -2784.569348 | -2786.8576386 |
| MeE1                      | -2784.527363 | -2784.479196 | -2784.478251 | -2784.609449 | -2786.8962911 |
| MeF                       | -2784.519815 | -2784.473763 | -2784.472819 | -2784.594064 | -2786.8927077 |
| MeTS <sub>F-F1</sub>      | -2784.496796 | -2784.450769 | -2784.449824 | -2784.572091 | -2786.8654366 |
| MeF1                      | -2784.533530 | -2784.485750 | -2784.484806 | -2784.614430 | -2786.9002032 |
| MeTS <sub>A1'-B</sub> (1) | -2245.669246 | -2245.634315 | -2245.633371 | -2245.733489 | -2247.6985191 |
| MeTS <sub>A1'-B</sub> (2) | -1719.270806 | -1719.243990 | -1719.243046 | -1719.326683 | -1721.1013339 |
| MeTS <sub>A1'-B</sub> (3) | -1719.257618 | -1719.231023 | -1719.230079 | -1719.312997 | -1721.0903807 |
| MeTS <sub>A1'-B</sub> (4) | -1719.284972 | -1719.258510 | -1719.257566 | -1719.340899 | -1721.1119314 |
| MeC'(1)                   | -2784.502610 | -2784.453894 | -2784.452950 | -2784.586326 | -2786.8744083 |
| MeC'(2)                   | -2784.499127 | -2784.450953 | -2784.450009 | -2784.581246 | -2786.875344  |
| MeC'(3)                   | -2784.503793 | -2784.455077 | -2784.454133 | -2784.587037 | -2786.8731107 |
| MeC1'(1)                  | -2784.490902 | -2784.442527 | -2784.441582 | -2784.574455 | -2786.8655939 |
| MeC1'(2)                  | -2784.502195 | -2784.454574 | -2784.453630 | -2784.581996 | -2786.871125  |
| MeC1'(3)                  | -2784.508922 | -2784.460630 | -2784.459686 | -2784.590960 | -2786.8741872 |
| MeC1'(4)                  | -2784.500015 | -2784.452084 | -2784.451139 | -2784.579227 | -2786.8690418 |
| MeC1'(5)                  | -2784.493864 | -2784.446095 | -2784.445150 | -2784.574216 | -2786.8672657 |
| MeC1'(6)                  | -2784.490579 | -2784.441783 | -2784.440839 | -2784.575490 | -2786.8606993 |
| MeC1'(7)                  | -2784.494269 | -2784.448158 | -2784.447214 | -2784.569117 | -2786.86756   |
| MeC1'(8)                  | -2784.488095 | -2784.440450 | -2784.439506 | -2784.567771 | -2786.8614851 |
| MeC1'(9)                  | -2784.482785 | -2784.435390 | -2784.434445 | -2784.563767 | -2786.8551907 |
| MeC1'(10)                 | -2784.467379 | -2784.419992 | -2784.419048 | -2784.547673 | -2786.8396951 |
| MeC1'(11)                 | -2784.471524 | -2784.424284 | -2784.423340 | -2784.551745 | -2786.8419032 |
| MeC1'(12)                 | -2784.463946 | -2784.416170 | -2784.415226 | -2784.544575 | -2786.8376755 |
| MeC1'(13)                 | -2784.456589 | -2784.409108 | -2784.408164 | -2784.535049 | -2786.8335565 |
| MeC1'(14)                 | -2784.460657 | -2784.412835 | -2784.411891 | -2784.542204 | -2786.8387207 |
| MeC1'(15)                 | -2784.449057 | -2784.400961 | -2784.400017 | -2784.532159 | -2786.828311  |
| MeTS <sub>C1'-D</sub> (1) | -2784.489617 | -2784.441892 | -2784.440948 | -2784.570991 | -2786.8634354 |
| MeTS <sub>C1'-D</sub> (2) | -2784.494212 | -2784.447406 | -2784.446462 | -2784.572779 | -2786.8647542 |
| MeTS <sub>C1'-D</sub> (3) | -2784.483318 | -2784.435953 | -2784.435009 | -2784.564354 | -2786.8494162 |
| MeTS <sub>C1'-D</sub> (4) | -2784.480289 | -2784.433561 | -2784.432617 | -2784.558549 | -2786.8499608 |
| MeTS <sub>C1'-D</sub> (5) | -2784.492988 | -2784.445010 | -2784.444066 | -2784.576767 | -2786.8636764 |

|                               |              |              |              |              |               |
|-------------------------------|--------------|--------------|--------------|--------------|---------------|
| <b>MeTS<sub>C1-D</sub>(6)</b> | -2784.488385 | -2784.440336 | -2784.439391 | -2784.570303 | -2786.8580386 |
| <b>P-TS<sub>C2-D</sub>(1)</b> | -2868.718475 | -2868.673645 | -2868.672701 | -2868.793960 | -2871.0593722 |
| <b>P-TS<sub>C2-D</sub>(2)</b> | -2868.704468 | -2868.658836 | -2868.657892 | -2868.782604 | -2871.0468854 |
| <b>P-TS<sub>C2-D</sub>(3)</b> | -2868.699851 | -2868.654614 | -2868.653670 | -2868.777695 | -2871.0425306 |

$E_0$ = Sum of electronic and zero-point Energies in gas phase

$E$ = Sum of electronic and thermal Energies in gas phase

$H_{433}$ = Sum of electronic and thermal Enthalpies in gas phase

$G_{433}$ = Sum of electronic and thermal Free Energies in gas phase

$E_{(sol,M06)}$ = Single point energies calculated by M06 in solvent

#### 4. Calculated imaginary frequencies of all transition states species.

| Species                              | IF      |
|--------------------------------------|---------|
| MeTS <sub>A1-B</sub>                 | -201.85 |
| MeTS <sub>B1-C</sub>                 | -98.96  |
| MeTS <sub>C1-D1</sub>                | -341.72 |
| MeTS <sub>C2-D</sub>                 | -301.41 |
| MeTS <sub>D2-A</sub>                 | -170.41 |
| MeTS <sub>A1'</sub>                  | -288.19 |
| MeTS <sub>A1'-B'</sub>               | -715.42 |
| MeTS <sub>C1'-D'</sub>               | -365.38 |
| MeTS <sub>D1'-A</sub>                | -202.39 |
| P-TS <sub>C2-D</sub>                 | -243.69 |
| TS <sub>2A</sub>                     | -404.90 |
| TS <sub>2A'</sub>                    | -322.02 |
| TS <sub>2B</sub>                     | -399.13 |
| TS <sub>2B'</sub>                    | -250.66 |
| TS <sub>2C</sub>                     | -412.85 |
| TS <sub>2C'</sub>                    | -256.63 |
| NoDG <sup>+</sup> TS <sub>A1-B</sub> | -238.29 |
| NoDG <sup>+</sup> TS <sub>A-C</sub>  | -218.78 |
| MeTS <sub>A1-B</sub> (1)             | -185.82 |
| MeTS <sub>A1-B</sub> (2)             | -77.78  |
| MeTS <sub>A1-B</sub> (3)             | -135.93 |
| MeTS <sub>A1-B</sub> (4)             | -230.21 |
| MeTS <sub>A1-B</sub> (5)             | -240.24 |
| MeTS <sub>A1-B</sub> (6)             | -220.99 |
| MeTS <sub>A1-B</sub> (7)             | -229.86 |
| MeTS <sub>A1-B</sub> (8)             | -200.14 |
| MeTS <sub>A1-B</sub> (9)             | -241.22 |
| MeTS <sub>A1-B</sub> (10)            | -283.26 |
| MeTS <sub>A1-B</sub> (11)            | -284.20 |
| MeTS <sub>A1-B</sub> (12)            | -329.40 |
| MeTS <sub>A1-B</sub> (13)            | -383.94 |
| MeTS <sub>A1-B</sub> (14)            | -422.29 |
| MeTS <sub>A1-B</sub> (15)            | -328.77 |
| MeTS <sub>A1-B</sub> (16)            | -321.74 |
| MeTS <sub>A1-B</sub> (17)            | -402.43 |
| MeTS <sub>B2-B3</sub>                | -164.86 |
| MeTS <sub>C2-D</sub> (1)             | -231.47 |

|                                 |         |
|---------------------------------|---------|
| <b>MeTS<sub>C2-D</sub>(2)</b>   | -247.73 |
| <b>MeTS<sub>C1-D1</sub>(1)</b>  | -242.40 |
| <b>MeTS<sub>C1-D1</sub>(2)</b>  | -202.09 |
| <b>MeTS<sub>E-E1</sub></b>      | -252.57 |
| <b>MeTS<sub>F-F1</sub></b>      | -238.50 |
| <b>MeTS<sub>A1'-B'</sub>(1)</b> | -602.19 |
| <b>MeTS<sub>A1'-B'</sub>(2)</b> | -843.42 |
| <b>MeTS<sub>A1'-B'</sub>(3)</b> | -816.79 |
| <b>MeTS<sub>A1'-B'</sub>(4)</b> | -231.30 |
| <b>MeTS<sub>C1'-D'</sub>(1)</b> | -406.08 |
| <b>MeTS<sub>C1'-D'</sub>(2)</b> | -416.93 |
| <b>MeTS<sub>C1'-D'</sub>(3)</b> | -376.99 |
| <b>MeTS<sub>C1'-D'</sub>(4)</b> | -427.27 |
| <b>MeTS<sub>C1'-D'</sub>(5)</b> | -538.32 |
| <b>MeTS<sub>C1'-D'</sub>(6)</b> | -457.43 |
| <b>P-TS<sub>C2-D</sub>(1)</b>   | -211.97 |
| <b>P-TS<sub>C2-D</sub>(2)</b>   | -256.53 |
| <b>P-TS<sub>C2-D</sub>(3)</b>   | -262.70 |

## 5. Cartesian coordinates

31

1

|   |          |          |          |
|---|----------|----------|----------|
| C | -0.71021 | 0.17426  | -0.01448 |
| C | -1.97645 | 0.78618  | 0.08348  |
| C | -2.11372 | 2.14544  | 0.29309  |
| C | -0.93937 | 2.89971  | 0.37016  |
| C | 0.31626  | 2.31786  | 0.24701  |
| C | 0.45876  | 0.93569  | 0.0689   |
| H | -3.09102 | 2.61598  | 0.37888  |
| H | -1.01353 | 3.97532  | 0.52265  |
| H | 1.2139   | 2.93106  | 0.28255  |
| C | -0.94445 | -1.24215 | -0.31001 |
| C | -2.49059 | -1.40403 | -0.34768 |
| O | -0.18003 | -2.15883 | -0.50245 |
| O | -3.11571 | -2.41475 | -0.55611 |
| N | -3.00417 | -0.14918 | -0.08349 |
| C | -4.41241 | 0.15149  | -0.06213 |
| H | -4.71504 | 0.55694  | 0.91226  |
| H | -4.67305 | 0.87409  | -0.8471  |
| H | -4.94737 | -0.78547 | -0.24412 |
| C | 1.83026  | 0.37972  | -0.07439 |
| C | 2.34142  | -0.62811 | 0.76092  |
| C | 3.65834  | -1.02412 | 0.52544  |
| C | 3.80468  | 0.57651  | -1.22745 |
| C | 4.40206  | -0.43624 | -0.48535 |
| H | 4.09678  | -1.79902 | 1.15531  |
| H | 4.35686  | 1.08859  | -2.01768 |
| H | 5.42804  | -0.73954 | -0.6826  |
| C | 1.56629  | -1.25184 | 1.87905  |
| H | 0.83312  | -0.55948 | 2.30996  |
| H | 1.01953  | -2.13513 | 1.52454  |
| H | 2.23936  | -1.57478 | 2.68278  |
| N | 2.55746  | 0.98602  | -1.0234  |

24

2

|   |          |          |          |
|---|----------|----------|----------|
| C | -4.13248 | 0.87955  | 0.82453  |
| C | -2.74421 | 0.88151  | 0.82676  |
| C | -2.03383 | -0.0007  | -0.0003  |
| C | -2.74578 | -0.88203 | -0.82689 |
| C | -4.13406 | -0.87832 | -0.82377 |
| C | -4.83114 | 0.00105  | 0.00059  |
| H | -4.67399 | 1.56872  | 1.47044  |
| H | -2.18979 | 1.5649   | 1.46759  |
| H | -2.19266 | -1.56611 | -1.46811 |
| H | -4.67685 | -1.5668  | -1.46935 |
| H | -5.91973 | 0.00172  | 0.00089  |
| C | -0.60709 | -0.00121 | -0.00061 |
| C | 0.60709  | -0.00109 | -0.00044 |
| C | 2.03383  | -0.00065 | -0.00025 |
| C | 2.74527  | -0.82712 | 0.88162  |
| C | 2.74471  | 0.82654  | -0.88191 |
| C | 4.13356  | -0.82369 | 0.87901  |
| H | 2.19175  | -1.46843 | 1.56528  |
| C | 4.13299  | 0.82461  | -0.87885 |
| H | 2.1907   | 1.46728  | -1.56571 |
| C | 4.83114  | 0.00084  | 0.00021  |
| H | 4.67594  | -1.46914 | 1.56793  |
| H | 4.6749   | 1.47067  | -1.56758 |
| H | 5.91973  | 0.00145  | 0.00043  |

53

3

|   |          |         |          |
|---|----------|---------|----------|
| C | 0.51381  | 1.49618 | -0.18004 |
| C | -0.05569 | 2.79818 | -0.24055 |
| C | 0.75367  | 3.9239  | -0.45672 |
| C | 2.1204   | 3.78405 | -0.58481 |
| C | 2.70559  | 2.53142 | -0.44336 |
| C | 1.93293  | 1.39945 | -0.21161 |
| H | 0.30899  | 4.91113 | -0.53041 |
| H | 2.73821  | 4.66091 | -0.76926 |
| H | 3.78588  | 2.41523 | -0.49832 |
| C | -2.31182 | 1.91681 | 0.15613  |

|   |          |          |          |           |          |          |          |
|---|----------|----------|----------|-----------|----------|----------|----------|
| O | -3.4894  | 2.13179  | 0.40848  | C         | -4.63017 | -2.60134 | -0.08326 |
| N | -1.42144 | 2.9701   | -0.06942 | H         | -5.20908 | -1.91457 | 1.87507  |
| C | -1.99048 | 4.30874  | -0.06025 | H         | -3.85183 | -3.03526 | -2.04639 |
| H | -1.53368 | 4.92007  | 0.72769  | H         | -5.35568 | -3.41324 | -0.10207 |
| H | -1.84301 | 4.79955  | -1.03011 |           |          |          |          |
| H | -3.0578  | 4.20093  | 0.13675  |           |          |          |          |
| C | 2.73489  | 0.17013  | 0.06094  | <b>55</b> |          |          |          |
| C | 2.7236   | -0.43938 | 1.32889  | <b>4</b>  |          |          |          |
| C | 3.55018  | -1.5466  | 1.50041  | C         | 2.66663  | -0.01365 | -0.13492 |
| C | 4.34255  | -1.26466 | -0.72311 | C         | 3.2253   | 1.15449  | -0.68467 |
| C | 4.36246  | -1.98524 | 0.4636   | C         | 2.42637  | 2.18584  | -1.1441  |
| H | 3.561    | -2.0565  | 2.46463  | C         | 1.04722  | 2.01369  | -1.04456 |
| H | 4.99172  | -1.54536 | -1.55513 | C         | 0.45801  | 0.85642  | -0.52198 |
| H | 5.0126   | -2.84956 | 0.58052  | C         | 1.28381  | -0.17431 | -0.0276  |
| C | 1.89584  | 0.08135  | 2.46316  | H         | 2.84811  | 3.09926  | -1.55885 |
| H | 2.00109  | 1.1687   | 2.57342  | H         | 0.38685  | 2.80965  | -1.3901  |
| H | 0.82515  | -0.12159 | 2.32088  | C         | 3.78454  | -0.85709 | 0.30046  |
| H | 2.19522  | -0.38692 | 3.40871  | C         | 5.06745  | -0.05602 | -0.0652  |
| N | 3.55697  | -0.20929 | -0.92399 | O         | 3.81004  | -1.94938 | 0.8174   |
| C | -1.75036 | 0.5707   | 0.01207  | O         | 6.21386  | -0.38456 | 0.11718  |
| C | -0.40404 | 0.3635   | -0.1283  | N         | 4.62293  | 1.11225  | -0.65453 |
| C | 0.08069  | -1.03325 | -0.2882  | C         | 5.4976   | 2.15609  | -1.12272 |
| C | -0.2092  | -2.00186 | 0.67818  | H         | 5.3561   | 2.33648  | -2.19651 |
| C | 0.77106  | -1.41777 | -1.43972 | H         | 5.32247  | 3.09279  | -0.57682 |
| C | 0.20009  | -3.3173  | 0.50873  | H         | 6.52445  | 1.82248  | -0.94524 |
| H | -0.77689 | -1.71909 | 1.5648   | C         | 0.67262  | -1.32663 | 0.69549  |
| C | 1.17525  | -2.73639 | -1.61353 | C         | 0.71552  | -2.64055 | 0.20976  |
| H | 1.00211  | -0.6729  | -2.20115 | C         | 0.02467  | -3.601   | 0.94735  |
| C | 0.89651  | -3.68809 | -0.63809 | C         | -0.60647 | -1.91574 | 2.5042   |
| H | -0.0299  | -4.05765 | 1.27309  | C         | -0.64562 | -3.24748 | 2.10843  |
| H | 1.71923  | -3.01675 | -2.51437 | H         | 0.01307  | -4.63311 | 0.59528  |
| H | 1.21825  | -4.71953 | -0.77349 | H         | -1.11738 | -1.58854 | 3.41149  |
| C | -2.75483 | -0.52141 | -0.02876 | H         | -1.19326 | -3.98467 | 2.69132  |
| C | -3.62283 | -0.72515 | 1.04789  | C         | 1.43759  | -3.01937 | -1.0451  |
| C | -2.85856 | -1.35879 | -1.14302 | H         | 2.49039  | -3.24434 | -0.82864 |
| C | -4.54599 | -1.76327 | 1.02463  | H         | 0.99208  | -3.91272 | -1.49966 |
| H | -3.57045 | -0.05913 | 1.90708  | H         | 1.42262  | -2.21446 | -1.79121 |
| C | -3.78745 | -2.3917  | -1.17039 | N         | 0.02899  | -0.97312 | 1.81486  |
| H | -2.19326 | -1.20169 | -1.9915  | C         | -1.62718 | -0.29324 | -1.09313 |

|   |          |          |          |
|---|----------|----------|----------|
| H | -0.98684 | -0.96318 | -1.67517 |
| C | -1.02295 | 0.75061  | -0.49026 |
| C | -3.03689 | -0.68954 | -1.0532  |
| C | -3.58168 | -1.36971 | -2.1503  |
| C | -3.85169 | -0.47928 | 0.06887  |
| C | -4.90515 | -1.79191 | -2.14807 |
| H | -2.95005 | -1.56173 | -3.0187  |
| C | -5.17162 | -0.90892 | 0.0743   |
| H | -3.43512 | 0.01037  | 0.94839  |
| C | -5.7075  | -1.55881 | -1.0355  |
| H | -5.31006 | -2.31005 | -3.01616 |
| H | -5.78688 | -0.74076 | 0.95694  |
| H | -6.74384 | -1.89259 | -1.02743 |
| C | -1.73721 | 1.84829  | 0.2015   |
| C | -1.37826 | 2.20268  | 1.50726  |
| C | -2.75342 | 2.56266  | -0.44212 |
| C | -2.0451  | 3.23082  | 2.16363  |
| H | -0.59283 | 1.63369  | 2.00605  |
| C | -3.41116 | 3.59664  | 0.21321  |
| H | -3.02683 | 2.2937   | -1.46237 |
| C | -3.06175 | 3.93052  | 1.51883  |
| H | -1.76963 | 3.48779  | 3.18552  |
| H | -4.20051 | 4.14531  | -0.29859 |
| H | -3.57956 | 4.73938  | 2.03229  |

**2**  
**CO**

|   |      |      |          |
|---|------|------|----------|
| C | 0.00 | 0.00 | -0.64994 |
| O | 0.00 | 0.00 | 0.48746  |

**20**  
**Cod**

|   |          |          |          |
|---|----------|----------|----------|
| C | -0.05524 | 1.68991  | -0.19969 |
| C | 1.17274  | 1.25347  | -0.49316 |
| C | -1.17279 | -1.25348 | -0.49308 |
| C | 1.90982  | 0.02809  | -0.045   |
| C | 0.05521  | -1.68994 | -0.19972 |
| C | 1.10905  | -1.0616  | 0.67172  |
| H | 2.3856   | -0.41973 | -0.93403 |

|   |          |          |          |
|---|----------|----------|----------|
| H | 2.75244  | 0.33752  | 0.59739  |
| H | 1.81567  | -1.84453 | 0.98212  |
| H | 0.68776  | -0.66718 | 1.60367  |
| C | -1.10901 | 1.06156  | 0.67181  |
| H | -0.68767 | 0.66702  | 1.60368  |
| C | -1.9098  | -0.02802 | -0.04504 |
| H | -2.75259 | -0.33736 | 0.59718  |
| H | -2.38536 | 0.41987  | -0.93416 |
| H | -0.36191 | 2.62095  | -0.68353 |
| H | 1.75769  | 1.88364  | -1.1692  |
| H | -1.75781 | -1.88367 | -1.16904 |
| H | 0.36181  | -2.621   | -0.68355 |
| H | -1.81558 | 1.84448  | 0.98233  |

**22**

**A**

|    |          |          |          |
|----|----------|----------|----------|
| C  | -1.24504 | -1.1594  | -0.88331 |
| C  | -1.32762 | 0.16552  | -1.33559 |
| C  | -0.23609 | -0.07476 | 1.4759   |
| C  | -2.09708 | 1.25669  | -0.61998 |
| C  | -0.08608 | 1.22902  | 0.92156  |
| C  | -1.18697 | 2.06023  | 0.31632  |
| H  | -2.54817 | 1.9325   | -1.3579  |
| H  | -2.9386  | 0.81556  | -0.06825 |
| H  | -0.70693 | 2.8687   | -0.25211 |
| H  | -1.77077 | 2.5553   | 1.11181  |
| C  | -1.84854 | -1.69164 | 0.39522  |
| H  | -2.93273 | -1.85895 | 0.27747  |
| C  | -1.56612 | -0.79326 | 1.60541  |
| H  | -2.36746 | -0.05357 | 1.74345  |
| H  | -1.56152 | -1.40214 | 2.51829  |
| Rh | 0.59828  | -0.19456 | -0.43441 |
| Cl | 2.80347  | 0.04764  | 0.25668  |
| H  | -1.0081  | -1.92482 | -1.63107 |
| H  | -1.1257  | 0.34162  | -2.39652 |
| H  | 0.55396  | -0.39503 | 2.16031  |
| H  | 0.7925   | 1.7924   | 1.24828  |
| H  | -1.40654 | -2.68076 | 0.57769  |

**64**  
**MeA1**

|    |          |          |          |
|----|----------|----------|----------|
| C  | 2.36856  | 0.67551  | 0.37104  |
| C  | 2.39891  | 2.07377  | 0.06021  |
| C  | 2.97214  | 2.56771  | -1.08066 |
| C  | 3.55838  | 1.64463  | -1.98079 |
| C  | 3.55104  | 0.29255  | -1.73701 |
| C  | 2.94256  | -0.23482 | -0.56197 |
| H  | 2.99315  | 3.63618  | -1.28747 |
| H  | 4.02272  | 2.02145  | -2.89059 |
| H  | 3.99686  | -0.40274 | -2.447   |
| C  | 1.95064  | 0.55203  | 1.77573  |
| C  | 1.47639  | 1.98232  | 2.15462  |
| O  | 2.00704  | -0.35899 | 2.57185  |
| O  | 0.94798  | 2.33575  | 3.18488  |
| N  | 1.80891  | 2.79845  | 1.0912   |
| C  | 1.55999  | 4.21746  | 1.06362  |
| H  | 1.00491  | 4.47088  | 1.97202  |
| H  | 2.50014  | 4.78467  | 1.04465  |
| H  | 0.96091  | 4.47955  | 0.18114  |
| C  | 3.03579  | -1.67783 | -0.22241 |
| C  | 4.16225  | -2.47939 | -0.0816  |
| C  | 3.91898  | -3.81959 | 0.23966  |
| C  | 1.55374  | -3.42527 | 0.21097  |
| C  | 2.6235   | -4.29624 | 0.38649  |
| H  | 4.76582  | -4.49167 | 0.38038  |
| H  | 0.50863  | -3.71899 | 0.27713  |
| H  | 2.43672  | -5.33755 | 0.63649  |
| C  | 5.55009  | -1.94435 | -0.25104 |
| H  | 5.92837  | -2.11965 | -1.26799 |
| H  | 5.59221  | -0.86407 | -0.06946 |
| H  | 6.24512  | -2.43355 | 0.44213  |
| N  | 1.78734  | -2.14908 | -0.0831  |
| Rh | 0.65322  | -0.51671 | -0.51145 |
| Cl | -1.06224 | -1.95703 | -1.27217 |
| C  | -3.01458 | -0.09592 | 0.31863  |
| C  | -3.5663  | -1.16346 | 1.03643  |
| C  | -3.14538 | -1.44541 | 2.3252   |
| C  | -2.15507 | -0.62446 | 2.86904  |

|   |          |          |          |
|---|----------|----------|----------|
| C | -1.57649 | 0.42454  | 2.15444  |
| C | -1.98743 | 0.67806  | 0.84422  |
| H | -3.55869 | -2.27515 | 2.89524  |
| H | -1.8068  | -0.81682 | 3.88224  |
| H | -0.80186 | 1.0252   | 2.62537  |
| C | -3.63519 | -0.07986 | -1.00863 |
| C | -4.59889 | -1.29998 | -1.00916 |
| O | -3.52397 | 0.70845  | -1.91799 |
| O | -5.31021 | -1.67986 | -1.90607 |
| N | -4.50576 | -1.84793 | 0.26125  |
| C | -5.1855  | -3.05248 | 0.65874  |
| H | -4.46528 | -3.84874 | 0.8911   |
| H | -5.82297 | -2.87608 | 1.53529  |
| H | -5.80946 | -3.36644 | -0.18347 |
| C | -1.39395 | 1.68022  | -0.08143 |
| C | -1.9376  | 2.96475  | -0.1898  |
| C | -1.5034  | 3.76537  | -1.24352 |
| C | -0.05446 | 2.00754  | -1.94657 |
| C | -0.57904 | 3.27264  | -2.15348 |
| H | -1.92661 | 4.76245  | -1.36725 |
| H | 0.69163  | 1.58015  | -2.61364 |
| H | -0.26108 | 3.85713  | -3.01334 |
| C | -3.00379 | 3.42446  | 0.75506  |
| H | -2.72731 | 3.24761  | 1.80215  |
| H | -3.20543 | 4.49445  | 0.62775  |
| H | -3.94306 | 2.8831   | 0.57408  |
| N | -0.42442 | 1.23856  | -0.91257 |

**64**  
**MeTS<sub>A1-B</sub>**

|   |          |         |         |
|---|----------|---------|---------|
| C | 0.75026  | 0.23595 | 1.19425 |
| C | -0.40254 | 0.44175 | 1.97524 |
| C | -0.8464  | 1.72753 | 2.27325 |
| C | -0.08769 | 2.80468 | 1.81828 |
| C | 1.12737  | 2.6207  | 1.15811 |
| C | 1.58315  | 1.32932 | 0.87095 |
| H | -1.76701 | 1.89237 | 2.83168 |
| H | -0.44851 | 3.81578 | 2.00754 |
| H | 1.68642  | 3.49408 | 0.83532 |



|    |          |          |          |            |          |          |          |
|----|----------|----------|----------|------------|----------|----------|----------|
| C  | 1.25093  | -1.33326 | 1.77322  | H          | -0.45263 | 4.91537  | -0.85229 |
| C  | -0.05144 | -1.78281 | 2.46505  | H          | -1.79743 | 5.21483  | -1.99356 |
| O  | 2.34829  | -1.56052 | 2.24292  | H          | -2.05362 | 5.43132  | -0.2392  |
| O  | -0.25767 | -2.89283 | 2.90023  | C          | -1.90539 | -1.37096 | -0.94468 |
| N  | -0.9527  | -0.73579 | 2.4756   | C          | -3.20284 | -1.88042 | -1.06887 |
| C  | -2.24626 | -0.85197 | 3.11366  | C          | -3.44181 | -3.15562 | -0.55764 |
| H  | -2.37409 | -1.90618 | 3.37688  | C          | -1.15521 | -3.31378 | 0.09336  |
| H  | -2.29167 | -0.24911 | 4.0311   | C          | -2.41597 | -3.88357 | 0.02176  |
| H  | -3.04235 | -0.53848 | 2.42871  | H          | -4.4425  | -3.58007 | -0.63895 |
| C  | 2.84937  | 0.98662  | 0.20282  | H          | -0.30991 | -3.8419  | 0.52616  |
| C  | 4.02637  | 1.75646  | 0.21122  | H          | -2.57616 | -4.88655 | 0.40788  |
| C  | 5.14905  | 1.21562  | -0.41589 | C          | -4.29992 | -1.10368 | -1.72728 |
| C  | 3.9168   | -0.74265 | -0.97473 | H          | -3.94706 | -0.57314 | -2.62016 |
| C  | 5.10415  | -0.03059 | -1.01928 | H          | -5.11893 | -1.76707 | -2.02813 |
| H  | 6.07719  | 1.78726  | -0.41096 | H          | -4.70841 | -0.35597 | -1.03382 |
| H  | 3.79432  | -1.72798 | -1.4213  | N          | -0.91214 | -2.07458 | -0.35481 |
| H  | 5.97837  | -0.46003 | -1.50146 |            |          |          |          |
| C  | 4.15635  | 3.08671  | 0.89207  | <b>64</b>  |          |          |          |
| H  | 3.72056  | 3.90444  | 0.30119  | <b>MeB</b> |          |          |          |
| H  | 3.67108  | 3.09572  | 1.87534  | C          | 0.56323  | 0.12458  | 1.08969  |
| H  | 5.21503  | 3.33021  | 1.03925  | C          | -0.44774 | 0.43966  | 2.00111  |
| N  | 2.83119  | -0.24292 | -0.38002 | C          | -0.50132 | 1.71161  | 2.57489  |
| Rh | 1.03381  | -1.25944 | -0.27006 | C          | 0.52049  | 2.62082  | 2.3067   |
| Cl | 1.52763  | -2.73617 | -2.0851  | C          | 1.62736  | 2.25216  | 1.55073  |
| C  | -1.96195 | 1.16288  | -1.03346 | C          | 1.67465  | 0.98156  | 0.95386  |
| C  | -1.45754 | 2.3757   | -1.54155 | H          | -1.32098 | 1.99799  | 3.23243  |
| C  | -0.56264 | 2.40631  | -2.5937  | H          | 0.46942  | 3.61885  | 2.73991  |
| C  | -0.16782 | 1.17687  | -3.13006 | H          | 2.44522  | 2.95929  | 1.45588  |
| C  | -0.62146 | -0.03388 | -2.61462 | C          | 0.42839  | -2.17226 | 1.76911  |
| C  | -1.5115  | -0.06039 | -1.53225 | C          | -0.97426 | -1.8887  | 2.34491  |
| H  | -0.1783  | 3.34392  | -2.99047 | O          | 1.25954  | -2.80731 | 2.34621  |
| H  | 0.529    | 1.16184  | -3.96613 | O          | -1.66848 | -2.81885 | 2.70708  |
| H  | -0.25286 | -0.97333 | -3.02398 | N          | -1.36835 | -0.57547 | 2.34566  |
| C  | -2.8706  | 1.50239  | 0.05676  | C          | -2.67069 | -0.25785 | 2.9062   |
| C  | -2.79047 | 3.04744  | 0.19308  | H          | -3.2851  | -1.15986 | 2.84753  |
| O  | -3.59387 | 0.81253  | 0.74259  | H          | -2.5935  | 0.04206  | 3.96067  |
| O  | -3.3223  | 3.73478  | 1.03239  | H          | -3.13388 | 0.54692  | 2.32657  |
| N  | -1.97284 | 3.46968  | -0.83431 | C          | 2.83048  | 0.35598  | 0.28994  |
| C  | -1.53969 | 4.83269  | -0.9977  | C          | 4.07275  | 0.937    | -0.0238  |

|    |          |          |          |             |          |          |          |
|----|----------|----------|----------|-------------|----------|----------|----------|
| C  | 5.08352  | 0.09334  | -0.48533 | C           | -3.99075 | 0.26671  | -2.47331 |
| C  | 3.60689  | -1.76417 | -0.40287 | H           | -3.29983 | 0.71075  | -3.20027 |
| C  | 4.87673  | -1.26757 | -0.64698 | H           | -4.8622  | -0.11262 | -3.01925 |
| H  | 6.05564  | 0.52753  | -0.72079 | H           | -4.33462 | 1.06857  | -1.80715 |
| H  | 3.32804  | -2.80001 | -0.58582 | N           | -1.42447 | -1.72268 | -0.53993 |
| H  | 5.66693  | -1.92876 | -0.99141 |             |          |          |          |
| C  | 4.35642  | 2.40501  | 0.08412  | <b>64</b>   |          |          |          |
| H  | 3.55584  | 3.00691  | -0.36703 | <b>MeB1</b> |          |          |          |
| H  | 4.47305  | 2.73535  | 1.12548  | C           | 0.85779  | 0.72257  | -0.84907 |
| H  | 5.2891   | 2.64879  | -0.43812 | C           | 1.21176  | 2.07257  | -0.79322 |
| N  | 2.62676  | -0.96971 | 0.03011  | C           | 0.36635  | 3.01369  | -1.39297 |
| Rh | 0.63102  | -1.51685 | -0.05754 | C           | -0.74241 | 2.59259  | -2.12071 |
| Cl | 0.98221  | -3.1993  | -1.80221 | C           | -0.99067 | 1.24094  | -2.32895 |
| C  | -1.30358 | 1.68621  | -1.08908 | C           | -0.16148 | 0.28596  | -1.72202 |
| C  | -0.36867 | 2.70278  | -1.35938 | H           | 0.60046  | 4.07552  | -1.3255  |
| C  | 0.70218  | 2.49156  | -2.21128 | H           | -1.39707 | 3.33059  | -2.58358 |
| C  | 0.82744  | 1.22173  | -2.78037 | H           | -1.82232 | 0.95262  | -2.96277 |
| C  | -0.06211 | 0.18834  | -2.48854 | C           | 3.54275  | 1.6346   | -0.28225 |
| C  | -1.13926 | 0.40673  | -1.61755 | O           | 4.65684  | 1.99517  | 0.0217   |
| H  | 1.4218   | 3.27874  | -2.42952 | N           | 2.42705  | 2.44837  | -0.19964 |
| H  | 1.65695  | 1.02296  | -3.45702 | C           | 2.60552  | 3.77817  | 0.3459   |
| H  | 0.08989  | -0.80405 | -2.91399 | H           | 2.7739   | 4.53362  | -0.43532 |
| C  | -2.26465 | 2.22901  | -0.13124 | H           | 1.71691  | 4.05028  | 0.9292   |
| C  | -1.76001 | 3.6649   | 0.18314  | H           | 3.48378  | 3.75486  | 0.996    |
| O  | -3.26779 | 1.749    | 0.34923  | C           | -0.11507 | -1.15134 | -1.99619 |
| O  | -2.22103 | 4.44438  | 0.9801   | C           | -0.93064 | -1.9185  | -2.85212 |
| N  | -0.6655  | 3.86363  | -0.63919 | C           | -0.55085 | -3.24132 | -3.07469 |
| C  | 0.19139  | 5.017    | -0.55246 | C           | 1.32064  | -2.98302 | -1.6376  |
| H  | 1.18976  | 4.73088  | -0.18811 | C           | 0.58953  | -3.78328 | -2.49609 |
| H  | 0.2911   | 5.51259  | -1.52638 | H           | -1.16487 | -3.85312 | -3.73538 |
| H  | -0.26554 | 5.71051  | 0.16023  | H           | 2.22446  | -3.32898 | -1.13658 |
| C  | -2.01692 | -0.73612 | -1.24774 | H           | 0.9026   | -4.8033  | -2.70109 |
| C  | -3.34268 | -0.82592 | -1.68249 | C           | -2.15637 | -1.39025 | -3.53349 |
| C  | -4.04479 | -1.9859  | -1.35835 | H           | -2.86717 | -0.94648 | -2.82293 |
| C  | -2.10433 | -2.84628 | -0.27522 | H           | -1.90576 | -0.63221 | -4.2882  |
| C  | -3.42577 | -3.00767 | -0.65756 | H           | -2.67569 | -2.20388 | -4.05288 |
| H  | -5.08062 | -2.08624 | -1.68206 | N           | 0.95409  | -1.72758 | -1.37921 |
| H  | -1.56611 | -3.62515 | 0.25757  | Rh          | 1.7668   | -0.66915 | 0.19413  |
| H  | -3.94716 | -3.9296  | -0.41537 | Cl          | 2.70573  | 0.09985  | 2.22722  |

|   |          |          |          |    |          |          |          |
|---|----------|----------|----------|----|----------|----------|----------|
| C | 3.28857  | 0.17326  | -0.72382 | C  | -2.24619 | 1.259    | -2.27686 |
| O | 4.02703  | -0.40874 | -1.46783 | C  | -1.54389 | 0.06779  | -2.42366 |
| C | -2.1351  | 0.7053   | 0.99794  | C  | -0.32058 | -0.10662 | -1.75553 |
| C | -2.24888 | 2.10601  | 1.02864  | H  | -2.28283 | 3.25484  | -1.46396 |
| C | -1.50365 | 2.87095  | 1.90871  | H  | -3.19562 | 1.37953  | -2.79785 |
| C | -0.62045 | 2.19236  | 2.75184  | H  | -1.96001 | -0.69871 | -3.0685  |
| C | -0.49508 | 0.80518  | 2.7321   | C  | 1.44827  | 3.2082   | 0.1147   |
| C | -1.25107 | 0.03613  | 1.84511  | O  | 2.02591  | 4.01156  | 0.80361  |
| H | -1.58562 | 3.95599  | 1.93472  | N  | 0.08468  | 3.18074  | -0.1064  |
| H | 0.00001  | 2.76305  | 3.44098  | C  | -0.68626 | 4.32962  | 0.33692  |
| H | 0.23009  | 0.31669  | 3.37746  | H  | -0.9099  | 5.00575  | -0.49971 |
| C | -2.96272 | 0.2301   | -0.10294 | H  | -1.62613 | 3.99046  | 0.7888   |
| C | -3.57189 | 1.51117  | -0.73856 | H  | -0.09081 | 4.86798  | 1.07801  |
| O | -3.19003 | -0.89177 | -0.50491 | C  | 0.63762  | -1.20822 | -1.8994  |
| O | -4.26965 | 1.57285  | -1.72356 | C  | 0.48194  | -2.41465 | -2.60825 |
| N | -3.14787 | 2.55858  | 0.05316  | C  | 1.5836   | -3.26666 | -2.68029 |
| C | -3.40138 | 3.94298  | -0.24909 | C  | 2.88503  | -1.75364 | -1.38913 |
| H | -3.9091  | 4.44404  | 0.58506  | C  | 2.79688  | -2.94238 | -2.09185 |
| H | -2.46132 | 4.47109  | -0.46573 | H  | 1.47795  | -4.20607 | -3.22272 |
| H | -4.04537 | 3.97245  | -1.13358 | H  | 3.78799  | -1.41964 | -0.8787  |
| C | -1.08909 | -1.44249 | 1.84199  | H  | 3.66028  | -3.59792 | -2.1646  |
| C | -2.11475 | -2.28391 | 2.3053   | C  | -0.79088 | -2.82012 | -3.28698 |
| C | -1.83416 | -3.64477 | 2.38911  | H  | -1.65561 | -2.75669 | -2.61541 |
| C | 0.35119  | -3.22311 | 1.55714  | H  | -0.99716 | -2.19795 | -4.16892 |
| C | -0.58668 | -4.1299  | 2.0229   | H  | -0.71707 | -3.85704 | -3.6343  |
| H | -2.60335 | -4.32409 | 2.75695  | N  | 1.83215  | -0.93731 | -1.28945 |
| H | 1.34627  | -3.5499  | 1.24998  | Rh | 1.86475  | 0.65449  | 0.01276  |
| H | -0.34389 | -5.18708 | 2.09686  | Cl | 4.10784  | 0.52752  | 1.01872  |
| C | -3.46108 | -1.75801 | 2.69292  | C  | 2.30591  | 2.22142  | -0.91252 |
| H | -3.38918 | -0.82423 | 3.26394  | O  | 2.88849  | 2.69253  | -1.8246  |
| H | -4.06267 | -1.55387 | 1.79627  | C  | -2.23265 | -0.42509 | 1.03443  |
| H | -4.0061  | -2.48995 | 3.30023  | C  | -3.1855  | 0.60771  | 0.99516  |
| N | 0.10963  | -1.91327 | 1.46273  | C  | -3.04858 | 1.74516  | 1.77324  |
|   |          |          |          | C  | -1.89598 | 1.84837  | 2.55755  |
|   |          |          |          | C  | -0.92282 | 0.85311  | 2.57393  |
|   |          |          |          | C  | -1.08925 | -0.31813 | 1.82564  |
|   |          |          |          | H  | -3.79482 | 2.53783  | 1.76532  |
|   |          |          |          | H  | -1.7528  | 2.73665  | 3.17182  |
|   |          |          |          | H  | -0.02963 | 0.96599  | 3.1865   |

64

MeTS<sub>B1-C</sub>

|   |          |          |          |    |          |          |          |
|---|----------|----------|----------|----|----------|----------|----------|
| C | -2.63376 | -1.42033 | 0.04382  | H  | -1.83417 | 3.97556  | -0.66286 |
| C | -3.92001 | -0.84504 | -0.61016 | H  | -0.26537 | 4.76     | -0.3225  |
| O | -2.14038 | -2.48299 | -0.26604 | C  | 0.76384  | -1.87637 | -1.41889 |
| O | -4.54018 | -1.31413 | -1.53359 | C  | 0.58038  | -3.25582 | -1.65244 |
| N | -4.20565 | 0.31764  | 0.083    | C  | 1.66275  | -4.09687 | -1.38689 |
| C | -5.24533 | 1.23551  | -0.30394 | C  | 2.96207  | -2.24773 | -0.67444 |
| H | -5.90999 | 1.46031  | 0.53956  | C  | 2.87114  | -3.61014 | -0.91379 |
| H | -4.81267 | 2.17336  | -0.68287 | H  | 1.54092  | -5.16608 | -1.56207 |
| H | -5.82339 | 0.75737  | -1.10071 | H  | 3.86689  | -1.7713  | -0.28952 |
| C | -0.08381 | -1.40173 | 1.96063  | H  | 3.71587  | -4.26726 | -0.72364 |
| C | -0.43516 | -2.63126 | 2.54412  | C  | -0.69256 | -3.87709 | -2.14438 |
| C | 0.59583  | -3.53935 | 2.77426  | H  | -1.55979 | -3.57276 | -1.54474 |
| C | 2.14876  | -1.97584 | 1.87103  | H  | -0.89657 | -3.62791 | -3.19469 |
| C | 1.90175  | -3.2135  | 2.44644  | H  | -0.62095 | -4.96943 | -2.08414 |
| H | 0.36317  | -4.50054 | 3.23345  | N  | 1.94073  | -1.43039 | -0.9076  |
| H | 3.15654  | -1.6458  | 1.61522  | Rh | 1.84245  | 0.7876   | -0.28087 |
| H | 2.72313  | -3.89927 | 2.63969  | Cl | 4.25806  | 0.97725  | 0.44008  |
| C | -1.84037 | -2.97719 | 2.93239  | C  | 2.57974  | 1.483    | -1.83343 |
| H | -2.3602  | -2.13456 | 3.40508  | O  | 3.04014  | 1.90003  | -2.79595 |
| H | -2.42489 | -3.2791  | 2.0525   | C  | -2.24731 | -0.0507  | 1.00072  |
| H | -1.84826 | -3.81608 | 3.6382   | C  | -3.35352 | 0.71528  | 0.60137  |
| N | 1.1784   | -1.0888  | 1.62275  | C  | -3.46359 | 2.05369  | 0.94178  |
|   |          |          |          | C  | -2.40683 | 2.62007  | 1.65839  |
|   |          |          |          | C  | -1.28048 | 1.88362  | 2.02376  |
|   |          |          |          | C  | -1.18984 | 0.52686  | 1.70096  |
|   |          |          |          | H  | -4.33095 | 2.64676  | 0.65682  |
|   |          |          |          | H  | -2.45831 | 3.67266  | 1.93405  |
|   |          |          |          | H  | -0.45748 | 2.3644   | 2.55109  |
|   |          |          |          | C  | -2.44948 | -1.40421 | 0.48944  |
|   |          |          |          | C  | -3.76314 | -1.33059 | -0.33831 |
|   |          |          |          | O  | -1.81739 | -2.4223  | 0.66661  |
|   |          |          |          | O  | -4.26054 | -2.20761 | -1.00251 |
|   |          |          |          | N  | -4.25379 | -0.0516  | -0.14528 |
|   |          |          |          | C  | -5.41122 | 0.46984  | -0.82403 |
|   |          |          |          | H  | -6.17802 | 0.79692  | -0.10992 |
|   |          |          |          | H  | -5.13547 | 1.31975  | -1.46479 |
|   |          |          |          | H  | -5.81733 | -0.33538 | -1.44404 |
|   |          |          |          | C  | -0.05067 | -0.27072 | 2.22257  |
|   |          |          |          | C  | -0.28562 | -1.08542 | 3.34342  |

**64**  
**MeC**

|   |          |          |          |   |          |          |          |
|---|----------|----------|----------|---|----------|----------|----------|
| C | 0.13695  | 0.47052  | -1.21064 | H | -4.33095 | 2.64676  | 0.65682  |
| C | -0.62105 | 1.61641  | -1.44895 | H | -2.45831 | 3.67266  | 1.93405  |
| C | -1.79308 | 1.52074  | -2.19491 | H | -0.45748 | 2.3644   | 2.55109  |
| C | -2.17501 | 0.2587   | -2.65856 | C | -2.44948 | -1.40421 | 0.48944  |
| C | -1.41832 | -0.88244 | -2.4134  | C | -3.76314 | -1.33059 | -0.33831 |
| C | -0.21034 | -0.79175 | -1.68964 | O | -1.81739 | -2.4223  | 0.66661  |
| H | -2.40394 | 2.39713  | -2.41129 | O | -4.26054 | -2.20761 | -1.00251 |
| H | -3.09572 | 0.15953  | -3.23368 | N | -4.25379 | -0.0516  | -0.14528 |
| H | -1.77612 | -1.82663 | -2.80872 | C | -5.41122 | 0.46984  | -0.82403 |
| C | 1.00676  | 2.62917  | -0.02144 | H | -6.17802 | 0.79692  | -0.10992 |
| O | 1.38561  | 3.49967  | 0.71897  | H | -5.13547 | 1.31975  | -1.46479 |
| N | -0.11329 | 2.77722  | -0.86063 | H | -5.81733 | -0.33538 | -1.44404 |
| C | -0.78397 | 4.0531   | -0.97543 | C | -0.05067 | -0.27072 | 2.22257  |
| H | -0.75079 | 4.41947  | -2.01065 | C | -0.28562 | -1.08542 | 3.34342  |

|   |          |          |         |    |          |          |          |
|---|----------|----------|---------|----|----------|----------|----------|
| C | 0.80359  | -1.7353  | 3.91322 | H  | -4.82054 | 1.68264  | 0.84714  |
| C | 2.21247  | -0.73964 | 2.27378 | H  | -4.74761 | 2.31914  | -0.80552 |
| C | 2.06823  | -1.55631 | 3.38067 | H  | -5.96533 | 1.11147  | -0.37283 |
| H | 0.65003  | -2.36958 | 4.78621 | N  | -1.8496  | -0.69097 | -0.94216 |
| H | 3.19105  | -0.54557 | 1.8352  | Rh | 0.40846  | -0.28362 | -0.95761 |
| H | 2.94425  | -2.03161 | 3.81437 | Cl | 0.97381  | -2.65797 | -1.50782 |
| C | -1.65502 | -1.25777 | 3.9284  | C  | 0.25228  | -0.76936 | 1.40949  |
| H | -2.19075 | -0.30476 | 4.02008 | C  | 1.47093  | -0.79531 | 1.2313   |
| H | -2.26789 | -1.92447 | 3.3069  | C  | -1.05933 | -0.87695 | 1.97675  |
| H | -1.59044 | -1.707   | 4.92627 | C  | -1.76968 | -2.081   | 1.88051  |
| N | 1.17782  | -0.10938 | 1.68834 | C  | -1.62982 | 0.21721  | 2.63975  |

**57**  
**MeC1**

|   |          |          |          |                                         |          |          |          |
|---|----------|----------|----------|-----------------------------------------|----------|----------|----------|
| C | -0.39452 | 1.43985  | -0.42762 | H                                       | -1.0735  | 1.15194  | 2.70257  |
| C | 0.5179   | 2.45379  | -0.15227 | C                                       | -3.60423 | -1.09046 | 3.09261  |
| C | 0.06518  | 3.66757  | 0.35563  | H                                       | -3.58572 | -3.11884 | 2.35974  |
| C | -1.30746 | 3.82154  | 0.56744  | H                                       | -3.33675 | 0.95719  | 3.71368  |
| C | -2.21685 | 2.81189  | 0.28023  | H                                       | -4.59812 | -1.17558 | 3.52928  |
| C | -1.77192 | 1.57788  | -0.23991 | C                                       | 2.89753  | -0.80895 | 1.29326  |
| H | 0.75215  | 4.48085  | 0.58519  | C                                       | 3.64968  | -1.76962 | 0.60644  |
| H | -1.67653 | 4.76382  | 0.96905  | C                                       | 3.54063  | 0.17886  | 2.05492  |
| H | -3.2649  | 2.99833  | 0.48296  | C                                       | 5.03422  | -1.73351 | 0.68604  |
| C | 2.11558  | 0.87399  | -0.97157 | H                                       | 3.1289   | -2.50156 | -0.00927 |
| O | 3.19595  | 0.54658  | -1.38673 | C                                       | 4.92508  | 0.20671  | 2.12208  |
| N | 1.84974  | 2.13427  | -0.43176 | H                                       | 2.93916  | 0.91753  | 2.58397  |
| C | 2.90913  | 3.11445  | -0.30786 | C                                       | 5.67203  | -0.74796 | 1.43482  |
| H | 2.71348  | 3.98547  | -0.94867 | H                                       | 5.62139  | -2.47293 | 0.1452   |
| H | 3.00268  | 3.45291  | 0.73314  | H                                       | 5.42515  | 0.97419  | 2.71029  |
| H | 3.84191  | 2.63763  | -0.61793 | H                                       | 6.75949  | -0.72167 | 1.48301  |
| C | -2.58987 | 0.39066  | -0.58582 | C                                       | 0.35452  | 0.03302  | -2.79777 |
| C | -3.99792 | 0.29675  | -0.59443 | O                                       | 0.31176  | 0.19328  | -3.93085 |
| C | -4.56122 | -0.9165  | -0.99371 |                                         |          |          |          |
| C | -2.40354 | -1.83696 | -1.32493 | <b>57</b>                               |          |          |          |
| C | -3.77981 | -1.99689 | -1.36979 | <b>Me<sup>e</sup>TS<sub>C1-D1</sub></b> |          |          |          |
| H | -5.64818 | -1.00089 | -1.0118  | C                                       | 0.71979  | -1.02227 | 0.76655  |
| H | -1.6998  | -2.63014 | -1.5905  | C                                       | 0.40738  | -1.54084 | 2.03329  |
| H | -4.22078 | -2.93791 | -1.68841 | C                                       | 1.44544  | -1.93989 | 2.87999  |
| C | -4.92333 | 1.41219  | -0.21292 | C                                       | 2.74786  | -1.90602 | 2.38538  |

|    |          |          |          |             |          |          |          |
|----|----------|----------|----------|-------------|----------|----------|----------|
| C  | 3.04962  | -1.48488 | 1.08597  | H           | 4.33269  | 3.96643  | 1.48611  |
| C  | 2.02996  | -1.03121 | 0.24704  | C           | -2.29151 | 1.79232  | 0.14006  |
| H  | 1.24693  | -2.32626 | 3.87833  | C           | -2.08635 | 3.17093  | 0.31169  |
| H  | 3.55949  | -2.24917 | 3.02503  | C           | -3.58827 | 1.31099  | -0.06947 |
| H  | 4.07921  | -1.54651 | 0.74705  | C           | -3.15697 | 4.0504   | 0.25964  |
| C  | -1.8557  | -1.52195 | 1.21816  | H           | -1.07625 | 3.5432   | 0.48503  |
| O  | -3.04009 | -1.67028 | 1.36904  | C           | -4.65708 | 2.19856  | -0.10973 |
| N  | -0.94422 | -1.67632 | 2.29451  | H           | -3.74478 | 0.24272  | -0.19606 |
| C  | -1.43365 | -2.00431 | 3.62004  | C           | -4.44615 | 3.56424  | 0.04859  |
| H  | -1.11799 | -3.01432 | 3.91558  | H           | -2.9876  | 5.11849  | 0.38765  |
| H  | -1.06362 | -1.2813  | 4.35844  | H           | -5.66281 | 1.81513  | -0.27118 |
| H  | -2.52441 | -1.9687  | 3.58675  | H           | -5.28767 | 4.25445  | 0.0094   |
| C  | 2.15266  | -0.54379 | -1.14599 | C           | -0.77027 | -2.94504 | -1.01798 |
| C  | 3.32024  | -0.02924 | -1.74296 | O           | -0.80836 | -4.03597 | -1.36045 |
| C  | 3.22088  | 0.40306  | -3.0671  |             |          |          |          |
| C  | 0.90615  | -0.13537 | -3.09093 | <b>57</b>   |          |          |          |
| C  | 2.02357  | 0.34267  | -3.76376 | <b>MeD1</b> |          |          |          |
| H  | 4.10981  | 0.81182  | -3.54874 | C           | -0.44919 | -1.05443 | -0.78667 |
| H  | -0.08919 | -0.18545 | -3.53873 | C           | 0.28421  | -1.66168 | -1.84451 |
| H  | 1.94772  | 0.68438  | -4.79299 | C           | -0.03022 | -2.96915 | -2.23922 |
| C  | 4.62444  | 0.1429   | -1.02417 | C           | -0.93632 | -3.70549 | -1.49116 |
| H  | 4.48084  | 0.56282  | -0.01941 | C           | -1.4761  | -3.20513 | -0.29621 |
| H  | 5.17359  | -0.8026  | -0.91575 | C           | -1.21271 | -1.89826 | 0.07023  |
| H  | 5.27447  | 0.82701  | -1.58279 | H           | 0.48742  | -3.42461 | -3.08135 |
| N  | 0.98247  | -0.5526  | -1.83256 | H           | -1.15329 | -4.73162 | -1.78366 |
| Rh | -0.8636  | -1.07095 | -0.47917 | H           | -2.05338 | -3.85505 | 0.36044  |
| Cl | -2.52008 | -0.92711 | -2.30222 | C           | 2.21784  | -0.35177 | -1.44647 |
| C  | 0.04583  | 0.90319  | 0.69228  | O           | 3.23032  | 0.20922  | -1.75734 |
| C  | -1.14916 | 0.89987  | 0.22583  | N           | 1.35439  | -0.94476 | -2.38755 |
| C  | 1.23194  | 1.7013   | 0.92741  | C           | 1.76623  | -1.07424 | -3.77377 |
| C  | 1.63188  | 2.61097  | -0.06316 | H           | 2.3368   | -1.99756 | -3.95091 |
| C  | 1.96479  | 1.61525  | 2.11814  | H           | 0.88583  | -1.05817 | -4.42579 |
| C  | 2.74161  | 3.42312  | 0.14003  | H           | 2.41011  | -0.22335 | -4.00985 |
| H  | 1.06052  | 2.66162  | -0.99092 | C           | -1.49732 | -1.34353 | 1.42079  |
| C  | 3.0714   | 2.42772  | 2.31531  | C           | -2.76566 | -1.18653 | 1.9804   |
| H  | 1.65462  | 0.90005  | 2.87889  | C           | -2.81711 | -0.64997 | 3.27148  |
| C  | 3.46315  | 3.33096  | 1.32686  | C           | -0.43838 | -0.46376 | 3.28224  |
| H  | 3.04501  | 4.12805  | -0.63209 | C           | -1.65617 | -0.29489 | 3.93759  |
| H  | 3.63188  | 2.36228  | 3.24618  | H           | -3.78938 | -0.50065 | 3.74294  |

|    |          |          |          |    |          |          |          |
|----|----------|----------|----------|----|----------|----------|----------|
| H  | 0.51039  | -0.17326 | 3.73521  | C  | 0.52916  | 2.27692  | 0.64293  |
| H  | -1.68719 | 0.12702  | 4.93928  | C  | 0.08911  | 3.28313  | 1.49692  |
| C  | -4.02673 | -1.50681 | 1.23708  | C  | -1.28086 | 3.37138  | 1.75986  |
| H  | -4.68488 | -0.62762 | 1.20812  | C  | -2.2007  | 2.50703  | 1.18072  |
| H  | -3.82828 | -1.79535 | 0.19953  | C  | -1.76415 | 1.48404  | 0.31168  |
| H  | -4.58565 | -2.32042 | 1.7193   | H  | 0.78269  | 3.99457  | 1.94349  |
| N  | -0.36587 | -0.97189 | 2.05784  | H  | -1.64023 | 4.15107  | 2.42961  |
| Rh | 1.41632  | -0.69057 | 0.37136  | H  | -3.24782 | 2.64445  | 1.42316  |
| C  | -0.64369 | 0.44592  | -0.70014 | C  | 2.10598  | 1.05011  | -0.66885 |
| C  | 0.42466  | 1.02981  | -0.14463 | O  | 3.18068  | 0.85506  | -1.17702 |
| C  | -1.96274 | 0.97393  | -1.08436 | N  | 1.85479  | 2.07297  | 0.24253  |
| C  | -2.43976 | 2.18493  | -0.5621  | C  | 2.90596  | 3.00104  | 0.60308  |
| C  | -2.80134 | 0.23768  | -1.93269 | H  | 2.65104  | 4.02054  | 0.28277  |
| C  | -3.70841 | 2.64341  | -0.88845 | H  | 3.07084  | 2.99912  | 1.69035  |
| H  | -1.80563 | 2.75997  | 0.11163  | H  | 3.82033  | 2.68074  | 0.09801  |
| C  | -4.0721  | 0.69894  | -2.2572  | C  | -2.58691 | 0.49644  | -0.42419 |
| H  | -2.44819 | -0.70937 | -2.34636 | C  | -3.99729 | 0.42294  | -0.45818 |
| C  | -4.53176 | 1.90403  | -1.73566 | C  | -4.57747 | -0.55961 | -1.2595  |
| H  | -4.06231 | 3.58511  | -0.47118 | C  | -2.43333 | -1.30273 | -1.92116 |
| H  | -4.70517 | 0.11346  | -2.92269 | C  | -3.80876 | -1.43054 | -2.01457 |
| H  | -5.52704 | 2.26665  | -1.98732 | H  | -5.66519 | -0.6242  | -1.29651 |
| C  | 0.77767  | 2.43167  | 0.00083  | H  | -1.76183 | -1.94916 | -2.48676 |
| C  | 0.99304  | 3.01944  | 1.25343  | H  | -4.25824 | -2.18254 | -2.65784 |
| C  | 0.89258  | 3.22481  | -1.15004 | C  | -4.91171 | 1.34193  | 0.2934   |
| C  | 1.28266  | 4.37428  | 1.35049  | H  | -4.7828  | 1.25523  | 1.38064  |
| H  | 0.94019  | 2.39846  | 2.14558  | H  | -4.75039 | 2.39342  | 0.02318  |
| C  | 1.19937  | 4.57512  | -1.04853 | H  | -5.95748 | 1.10179  | 0.06819  |
| H  | 0.73718  | 2.76242  | -2.12546 | N  | -1.85497 | -0.39253 | -1.14473 |
| C  | 1.38856  | 5.1555   | 0.20259  | Rh | 0.41052  | -0.04976 | -0.98227 |
| H  | 1.44054  | 4.82173  | 2.33068  | Cl | 0.14186  | 1.36867  | -2.8818  |
| H  | 1.2892   | 5.17787  | -1.95102 | C  | 0.1912   | -1.27714 | 0.98909  |
| H  | 1.6279   | 6.21474  | 0.28289  | C  | 1.41712  | -1.17466 | 0.84659  |
| C  | 2.31514  | -2.46853 | 0.71241  | C  | -1.09895 | -1.56759 | 1.54356  |
| O  | 2.89828  | -3.43732 | 0.88653  | C  | -1.85517 | -2.64949 | 1.07551  |
| Cl | 3.03086  | 0.41851  | 1.69511  | C  | -1.61276 | -0.75092 | 2.55943  |
|    |          |          |          | C  | -3.10858 | -2.90534 | 1.61229  |
|    |          |          |          | H  | -1.45106 | -3.27406 | 0.27942  |
|    |          |          |          | C  | -2.86766 | -1.01498 | 3.09317  |
| C  | -0.38935 | 1.3825   | 0.10242  | H  | -1.02398 | 0.09711  | 2.90734  |

**57**  
**MeC2**

|   |          |          |          |    |          |          |          |
|---|----------|----------|----------|----|----------|----------|----------|
| C | -3.61879 | -2.08674 | 2.61834  | C  | -0.90529 | 0.38877  | 3.10804  |
| H | -3.69321 | -3.74626 | 1.24342  | C  | -2.01146 | 0.96771  | 3.71372  |
| H | -3.26168 | -0.37613 | 3.88199  | H  | -4.08937 | 1.44104  | 3.42774  |
| H | -4.60375 | -2.28811 | 3.0364   | H  | 0.07423  | 0.39454  | 3.58607  |
| C | 2.83914  | -1.2089  | 1.01252  | H  | -1.92822 | 1.43598  | 4.69128  |
| C | 3.63878  | -2.04351 | 0.22435  | C  | -4.60369 | 0.4423   | 1.01554  |
| C | 3.43307  | -0.36889 | 1.96392  | H  | -4.44219 | 0.66341  | -0.04784 |
| C | 5.01634  | -2.03311 | 0.38469  | H  | -5.19555 | -0.48122 | 1.07786  |
| H | 3.17267  | -2.68268 | -0.524   | H  | -5.21866 | 1.24685  | 1.43715  |
| C | 4.81203  | -0.36091 | 2.11398  | N  | -0.97052 | -0.19412 | 1.91574  |
| H | 2.79748  | 0.28238  | 2.56383  | Rh | 0.8679   | -0.92826 | 0.61048  |
| C | 5.60449  | -1.18925 | 1.32284  | Cl | 0.3981   | -3.2074  | 1.35393  |
| H | 5.63681  | -2.67716 | -0.23528 | C  | 0.03338  | 0.8863   | -0.7464  |
| H | 5.27216  | 0.29761  | 2.84864  | C  | 1.22812  | 0.91935  | -0.29125 |
| H | 6.68695  | -1.17493 | 1.43661  | C  | -1.14816 | 1.62239  | -1.14291 |
| C | 1.32457  | -1.40257 | -2.23884 | C  | -1.664   | 2.58827  | -0.26682 |
| O | 1.88884  | -2.03974 | -3.00105 | C  | -1.77301 | 1.40812  | -2.37784 |

## 57

### Me<sup>e</sup>TS<sub>C2-D</sub>

|   |          |          |          |   |          |          |          |
|---|----------|----------|----------|---|----------|----------|----------|
| C | -0.76078 | -1.05383 | -0.58974 | H | -1.37975 | 0.64032  | -3.04283 |
| C | -0.47379 | -1.77072 | -1.75564 | C | -3.39287 | 3.11705  | -1.85864 |
| C | -1.5255  | -2.2931  | -2.50849 | H | -3.183   | 4.0733   | 0.06305  |
| C | -2.8213  | -2.16268 | -2.01062 | H | -3.36037 | 1.9936   | -3.69911 |
| C | -3.09408 | -1.53823 | -0.79264 | H | -4.26895 | 3.69902  | -2.14028 |
| C | -2.0534  | -0.96273 | -0.05805 | C | 2.39281  | 1.78827  | -0.27413 |
| H | -1.34526 | -2.84344 | -3.43047 | C | 2.2039   | 3.17648  | -0.34243 |
| H | -3.64493 | -2.60062 | -2.57209 | C | 3.69366  | 1.27629  | -0.20557 |
| H | -4.11413 | -1.54551 | -0.42128 | C | 3.29425  | 4.03417  | -0.32214 |
| C | 1.80191  | -1.67965 | -1.00675 | H | 1.19105  | 3.57366  | -0.40797 |
| O | 2.98695  | -1.87322 | -1.13313 | C | 4.78131  | 2.14146  | -0.19586 |
| N | 0.87795  | -1.96431 | -2.01951 | H | 3.84417  | 0.19713  | -0.20007 |
| C | 1.32853  | -2.56409 | -3.26086 | C | 4.58588  | 3.51835  | -0.24573 |
| H | 0.99554  | -3.60833 | -3.33204 | H | 3.13649  | 5.11054  | -0.36716 |
| H | 0.94253  | -2.00167 | -4.12087 | H | 5.78944  | 1.73368  | -0.14864 |
| H | 2.4198   | -2.53765 | -3.26526 | H | 5.44153  | 4.19139  | -0.22955 |
| C | -2.14772 | -0.27109 | 1.24463  | C | 2.45993  | -1.04253 | 1.77676  |
| C | -3.3065  | 0.34487  | 1.76106  | O | 3.36991  | -1.18359 | 2.45427  |
| C | -3.20619 | 0.95579  | 3.0109   |   |          |          |          |



**57**  
**MeD**

|    |          |          |          |
|----|----------|----------|----------|
| C  | -0.28685 | -1.12292 | -0.7824  |
| C  | 0.6021   | -1.77294 | -1.67427 |
| C  | 0.46188  | -3.13658 | -1.92805 |
| C  | -0.4625  | -3.87226 | -1.2022  |
| C  | -1.20213 | -3.28817 | -0.1692  |
| C  | -1.1     | -1.92829 | 0.05763  |
| H  | 1.13333  | -3.6329  | -2.62537 |
| H  | -0.53827 | -4.94441 | -1.37344 |
| H  | -1.79897 | -3.91209 | 0.49403  |
| C  | 2.41901  | -0.31177 | -1.25411 |
| O  | 3.43248  | 0.28199  | -1.50756 |
| N  | 1.6792   | -1.02578 | -2.18505 |
| C  | 2.26076  | -1.29386 | -3.49064 |
| H  | 2.92942  | -2.16569 | -3.46942 |
| H  | 1.45797  | -1.46352 | -4.21605 |
| H  | 2.84382  | -0.41907 | -3.78838 |
| C  | -1.63636 | -1.27032 | 1.27576  |
| C  | -2.99361 | -1.22267 | 1.6145   |
| C  | -3.32074 | -0.56109 | 2.79884  |
| C  | -1.01234 | -0.08072 | 3.14998  |
| C  | -2.33026 | 0.00967  | 3.58414  |
| H  | -4.3679  | -0.4871  | 3.09335  |
| H  | -0.19455 | 0.35935  | 3.72189  |
| H  | -2.57181 | 0.52982  | 4.50813  |
| C  | -4.05644 | -1.79803 | 0.72863  |
| H  | -3.8691  | -1.55674 | -0.32649 |
| H  | -4.11713 | -2.89192 | 0.80907  |
| H  | -5.04096 | -1.3963  | 0.99666  |
| N  | -0.67334 | -0.70042 | 2.02372  |
| Rh | 1.51273  | -0.49621 | 0.5395   |
| Cl | 2.24589  | -2.68936 | 1.3091   |
| C  | -0.53008 | 0.37032  | -0.79913 |
| C  | 0.45631  | 1.06756  | -0.21925 |
| C  | -1.8755  | 0.80886  | -1.21189 |
| C  | -2.54232 | 1.82242  | -0.51192 |
| C  | -2.54849 | 0.15869  | -2.25432 |
| C  | -3.83784 | 2.18437  | -0.85643 |

|   |          |          |          |
|---|----------|----------|----------|
| H | -2.03759 | 2.3036   | 0.32662  |
| C | -3.84369 | 0.52551  | -2.60164 |
| H | -2.04459 | -0.64456 | -2.79525 |
| C | -4.49327 | 1.53974  | -1.90322 |
| H | -4.34485 | 2.9692   | -0.29703 |
| H | -4.34898 | 0.01599  | -3.421   |
| H | -5.5102  | 1.82295  | -2.16973 |
| C | 0.66056  | 2.50195  | -0.09727 |
| C | 0.92589  | 3.09873  | 1.1425   |
| C | 0.5963   | 3.3164   | -1.23696 |
| C | 1.10184  | 4.47284  | 1.24247  |
| H | 0.97712  | 2.47228  | 2.03434  |
| C | 0.78746  | 4.68812  | -1.13567 |
| H | 0.39845  | 2.85187  | -2.2027  |
| C | 1.03715  | 5.27138  | 0.1037   |
| H | 1.29721  | 4.92286  | 2.21456  |
| H | 0.74462  | 5.30631  | -2.03103 |
| H | 1.18806  | 6.34666  | 0.18176  |
| C | 2.90435  | 0.42255  | 1.34933  |
| O | 3.77675  | 0.98659  | 1.8349   |

**57**  
**MeD2**

|   |          |          |          |
|---|----------|----------|----------|
| C | 0.89337  | -1.19983 | 0.567    |
| C | 0.16206  | -2.14859 | 1.30412  |
| C | 0.61094  | -3.46433 | 1.42111  |
| C | 1.78272  | -3.8583  | 0.79469  |
| C | 2.49649  | -2.94298 | 0.02836  |
| C | 2.05808  | -1.62844 | -0.09909 |
| H | 0.02439  | -4.1809  | 1.99334  |
| H | 2.12355  | -4.8882  | 0.87793  |
| H | 3.38837  | -3.25882 | -0.51206 |
| C | -2.01522 | -1.0737  | 1.3869   |
| O | -3.01887 | -0.62525 | 1.90683  |
| N | -1.03076 | -1.78023 | 1.98122  |
| C | -1.23331 | -2.19373 | 3.36986  |
| H | -1.65492 | -3.20499 | 3.43362  |
| H | -0.27294 | -2.16693 | 3.89445  |
| H | -1.93161 | -1.49475 | 3.83752  |

|    |          |          |          |
|----|----------|----------|----------|
| C  | 2.76401  | -0.70166 | -1.02634 |
| C  | 4.10052  | -0.31801 | -0.82587 |
| C  | 4.65047  | 0.55336  | -1.76494 |
| C  | 2.58141  | 0.54457  | -2.94199 |
| C  | 3.89431  | 0.99117  | -2.84199 |
| H  | 5.67849  | 0.89454  | -1.63638 |
| H  | 1.94669  | 0.86323  | -3.77084 |
| H  | 4.30751  | 1.67166  | -3.5835  |
| C  | 4.91276  | -0.77018 | 0.35085  |
| H  | 5.41223  | -1.73144 | 0.16301  |
| H  | 5.69336  | -0.03398 | 0.58164  |
| H  | 4.29652  | -0.89509 | 1.24942  |
| N  | 2.0226   | -0.27589 | -2.05686 |
| Rh | -2.28989 | -0.61773 | -0.5181  |
| Cl | -4.08298 | -0.79386 | -2.05012 |
| C  | -0.77812 | 0.54528  | 0.14167  |
| C  | 0.4737   | 0.21756  | 0.49753  |
| C  | 1.49302  | 1.24144  | 0.83443  |
| C  | 2.32473  | 1.05473  | 1.94505  |
| C  | 1.65839  | 2.39422  | 0.05922  |
| C  | 3.30123  | 1.98993  | 2.26785  |
| H  | 2.20068  | 0.16015  | 2.55735  |
| C  | 2.63818  | 3.32558  | 0.37858  |
| H  | 1.02943  | 2.53778  | -0.81859 |
| C  | 3.46516  | 3.12649  | 1.48135  |
| H  | 3.93813  | 1.82832  | 3.13657  |
| H  | 2.76278  | 4.21029  | -0.24384 |
| H  | 4.23483  | 3.85635  | 1.7269   |
| C  | -1.49165 | 1.81721  | 0.19185  |
| C  | -2.05779 | 2.36915  | -0.97188 |
| C  | -1.72787 | 2.4441   | 1.42858  |
| C  | -2.82413 | 3.52737  | -0.89784 |
| H  | -1.87916 | 1.88529  | -1.93275 |
| C  | -2.48078 | 3.60426  | 1.49168  |
| H  | -1.30799 | 2.00014  | 2.331    |
| C  | -3.03186 | 4.14623  | 0.32929  |
| H  | -3.25797 | 3.94452  | -1.80423 |
| H  | -2.65088 | 4.08752  | 2.45211  |
| H  | -3.63155 | 5.05308  | 0.38503  |

### 57

### Me<sup>e</sup>TS<sub>D2-A</sub>

|    |          |          |          |
|----|----------|----------|----------|
| C  | -1.24289 | -1.84008 | -1.40338 |
| O  | -0.6317  | -2.62082 | -1.98201 |
| C  | 0.8596   | -1.19133 | 0.65534  |
| C  | 0.09168  | -2.08291 | 1.43078  |
| C  | 0.53415  | -3.38987 | 1.65073  |
| C  | 1.71565  | -3.82731 | 1.0753   |
| C  | 2.45795  | -2.97283 | 0.26504  |
| C  | 2.0388   | -1.66543 | 0.04664  |
| H  | -0.06468 | -4.06998 | 2.25294  |
| H  | 2.0439   | -4.85276 | 1.23252  |
| H  | 3.35395  | -3.33605 | -0.23684 |
| C  | -1.93362 | -0.7646  | 1.37649  |
| O  | -2.94005 | -0.25596 | 1.84534  |
| N  | -1.10962 | -1.64532 | 2.01245  |
| C  | -1.54967 | -2.17615 | 3.29829  |
| H  | -2.04251 | -3.15036 | 3.18211  |
| H  | -0.68624 | -2.2817  | 3.96339  |
| H  | -2.26543 | -1.47281 | 3.72934  |
| C  | 2.76942  | -0.80241 | -0.92136 |
| C  | 4.11894  | -0.45267 | -0.74519 |
| C  | 4.68463  | 0.3726   | -1.71672 |
| C  | 2.60966  | 0.38019  | -2.88113 |
| C  | 3.93492  | 0.79359  | -2.8047  |
| H  | 5.7226   | 0.6892   | -1.60595 |
| H  | 1.97812  | 0.68644  | -3.71708 |
| H  | 4.36205  | 1.43625  | -3.57151 |
| C  | 4.93594  | -0.88814 | 0.43471  |
| H  | 5.4531   | -1.83991 | 0.24613  |
| H  | 5.70477  | -0.13904 | 0.66336  |
| H  | 4.32448  | -1.027   | 1.334    |
| N  | 2.03441  | -0.38953 | -1.96239 |
| Rh | -2.32165 | -0.6317  | -0.59356 |
| Cl | -4.04701 | -0.97572 | -2.12845 |
| C  | -0.85679 | 0.50885  | 0.28114  |
| C  | 0.44161  | 0.20997  | 0.52112  |
| C  | 1.46654  | 1.25661  | 0.74404  |

|   |          |          |          |    |          |          |          |
|---|----------|----------|----------|----|----------|----------|----------|
| C | 2.32213  | 1.1603   | 1.84753  | C  | 3.23526  | 1.72183  | -2.4921  |
| C | 1.615    | 2.33622  | -0.13278 | H  | 3.68027  | 0.7207   | -2.53119 |
| C | 3.3095   | 2.11387  | 2.06463  | H  | 2.90858  | 2.02956  | -3.49459 |
| H | 2.20755  | 0.32461  | 2.53897  | H  | 3.98693  | 2.42089  | -2.11574 |
| C | 2.61182  | 3.28015  | 0.07634  | C  | -2.61426 | 1.68545  | -0.33426 |
| H | 0.96155  | 2.40599  | -1.00165 | C  | -3.0739  | 2.99822  | -0.2446  |
| C | 3.46206  | 3.17258  | 1.17411  | C  | -4.2691  | 3.17765  | 0.45911  |
| H | 3.96352  | 2.02885  | 2.93134  | C  | -4.41389 | 0.82625  | 0.89519  |
| H | 2.73014  | 4.10206  | -0.6279  | C  | -4.94048 | 2.104    | 1.03164  |
| H | 4.24138  | 3.91565  | 1.33563  | H  | -4.67846 | 4.18417  | 0.54872  |
| C | -1.48852 | 1.83763  | 0.28627  | H  | -4.85743 | -0.07162 | 1.32173  |
| C | -1.99332 | 2.39013  | -0.90132 | H  | -5.86981 | 2.25256  | 1.57589  |
| C | -1.65923 | 2.53823  | 1.48884  | C  | -2.35455 | 4.15122  | -0.8662  |
| C | -2.64161 | 3.62141  | -0.88412 | H  | -3.05275 | 4.95902  | -1.11546 |
| H | -1.85469 | 1.85475  | -1.84198 | H  | -1.59999 | 4.54855  | -0.1749  |
| C | -2.29669 | 3.76884  | 1.49866  | H  | -1.83121 | 3.85526  | -1.78431 |
| H | -1.28228 | 2.09982  | 2.41244  | N  | -3.27924 | 0.65249  | 0.21853  |
| C | -2.79235 | 4.31102  | 0.31308  | Rh | -1.99542 | -0.88293 | -0.11821 |
| H | -3.02764 | 4.03923  | -1.81184 | Cl | -3.1039  | -2.30667 | 1.44179  |
| H | -2.41755 | 4.30751  | 2.43691  | H  | -2.73299 | -0.00277 | -2.42663 |
| H | -3.3002  | 5.2739   | 0.32677  | C  | 2.10766  | -0.64638 | 0.93908  |
| C | -1.24719 | -1.87213 | -1.39873 | C  | 2.44395  | 0.36553  | 1.86027  |
| O | -0.61397 | -2.68597 | -1.90604 | C  | 1.64055  | 0.65205  | 2.94805  |

## 64 MeA1'

|   |          |          |          |   |          |          |          |
|---|----------|----------|----------|---|----------|----------|----------|
| C | -0.11357 | 1.61061  | -0.9533  | H | 1.88813  | 1.44803  | 3.64655  |
| C | 0.88831  | 1.11923  | -1.79071 | H | -0.17124 | 0.08405  | 3.95081  |
| C | 0.65196  | 0.10313  | -2.72504 | H | -0.76677 | -1.71356 | 2.37668  |
| C | -0.64315 | -0.35207 | -2.85516 | C | 3.1231   | -0.61873 | -0.10923 |
| C | -1.71561 | 0.12979  | -2.05534 | C | 4.13017  | 0.48322  | 0.32425  |
| C | -1.44056 | 1.1053   | -1.03696 | O | 3.23278  | -1.25775 | -1.13558 |
| H | 1.46271  | -0.29799 | -3.32864 | O | 5.12927  | 0.82055  | -0.2667  |
| H | -0.86528 | -1.10431 | -3.61194 | N | 3.64211  | 0.99635  | 1.50475  |
| C | 0.49548  | 2.59586  | -0.08245 | C | 4.20223  | 2.14464  | 2.17683  |
| C | 1.9607   | 2.72636  | -0.59032 | H | 3.49446  | 2.98353  | 2.15069  |
| O | 0.05378  | 3.24097  | 0.84665  | H | 4.46151  | 1.9003   | 3.21481  |
| O | 2.78967  | 3.525    | -0.22545 | H | 5.10609  | 2.42923  | 1.63076  |
| N | 2.11819  | 1.75327  | -1.56665 | C | 0.58181  | -2.52124 | 0.19134  |

|   |          |          |          |    |          |          |          |
|---|----------|----------|----------|----|----------|----------|----------|
| C | 1.40047  | -3.65431 | 0.04437  | H  | 0.39463  | -3.47838 | 1.59854  |
| C | 0.94871  | -4.67354 | -0.78908 | H  | -1.59957 | -5.00259 | 1.92     |
| C | -1.03227 | -3.42984 | -1.21371 | C  | -4.2849  | -2.22508 | -0.66337 |
| C | -0.27509 | -4.56538 | -1.43205 | H  | -5.02341 | -1.7502  | -0.00686 |
| H | 1.56228  | -5.56523 | -0.91582 | H  | -4.136   | -1.56249 | -1.52362 |
| H | -2.01721 | -3.29954 | -1.65797 | H  | -4.70847 | -3.16655 | -1.03414 |
| H | -0.65199 | -5.35556 | -2.07621 | N  | -0.68516 | -2.10986 | 0.51348  |
| C | 2.70685  | -3.80728 | 0.76029  | Rh | 1.00452  | -1.13713 | -0.09986 |
| H | 3.51904  | -3.33204 | 0.19428  | Cl | 0.37215  | -2.58939 | -2.92763 |
| H | 2.68541  | -3.35775 | 1.75966  | C  | 1.7467   | 0.97559  | 1.51608  |
| H | 2.95886  | -4.86843 | 0.87189  | C  | 0.77561  | 1.72371  | 2.20173  |
| N | -0.61352 | -2.42694 | -0.42688 | C  | 0.69009  | 3.09854  | 2.06283  |

## 64

### MeTS<sub>A1</sub>'

|   |          |          |          |   |          |          |          |
|---|----------|----------|----------|---|----------|----------|----------|
| C | -2.67973 | 0.61696  | -0.8198  | H | -0.06298 | 3.67831  | 2.59337  |
| C | -2.39309 | 1.77086  | -1.58144 | H | 1.55436  | 4.79953  | 1.07127  |
| C | -1.17877 | 1.94722  | -2.21883 | H | 3.18317  | 3.4958   | -0.22883 |
| C | -0.19787 | 0.97547  | -2.00688 | C | 1.50418  | -0.45274 | 1.81693  |
| C | -0.42258 | -0.17188 | -1.23653 | C | 0.33804  | -0.44772 | 2.81388  |
| C | -1.71982 | -0.39434 | -0.69814 | O | 2.27645  | -1.45603 | 1.67642  |
| H | -0.97361 | 2.83342  | -2.81695 | O | -0.15318 | -1.38836 | 3.39812  |
| H | 0.78977  | 1.12126  | -2.44821 | N | -0.04295 | 0.87911  | 2.95212  |
| H | 0.10175  | -1.45423 | -2.03146 | C | -1.16961 | 1.30165  | 3.74317  |
| C | -3.93858 | 0.88712  | -0.1202  | H | -0.86315 | 2.02013  | 4.51483  |
| C | -4.43639 | 2.25231  | -0.66967 | H | -1.94397 | 1.75795  | 3.11096  |
| O | -4.50747 | 0.28535  | 0.7621   | H | -1.58135 | 0.40953  | 4.22408  |
| O | -5.46195 | 2.82334  | -0.38799 | C | 3.42428  | 0.77074  | -0.30236 |
| N | -3.45589 | 2.68176  | -1.53911 | C | 4.7606   | 1.06702  | -0.61962 |
| C | -3.49687 | 3.93997  | -2.23766 | C | 5.39147  | 0.27242  | -1.57467 |
| H | -2.6661  | 4.58926  | -1.92975 | C | 3.41224  | -1.02726 | -1.79227 |
| H | -3.44648 | 3.78811  | -3.32373 | C | 4.71453  | -0.77061 | -2.18657 |
| H | -4.44538 | 4.42252  | -1.98363 | H | 6.43236  | 0.47704  | -1.82675 |
| C | -1.87186 | -1.67689 | 0.00434  | H | 2.83109  | -1.84548 | -2.21921 |
| C | -3.00537 | -2.50093 | 0.05983  | H | 5.18689  | -1.39387 | -2.94098 |
| C | -2.88319 | -3.7026  | 0.76563  | C | 5.53615  | 2.15941  | 0.05698  |
| C | -0.58934 | -3.2498  | 1.19383  | H | 5.49549  | 3.10333  | -0.50442 |
| C | -1.69247 | -4.0738  | 1.36407  | H | 5.16495  | 2.36395  | 1.0669   |
| H | -3.75062 | -4.36041 | 0.82097  | H | 6.59418  | 1.87984  | 0.13214  |

N 2.78614 -0.28314 -0.8705

## 64

### Me<sup>e</sup>TS<sub>AI'</sub>-B'

C 2.37987 0.64161 -0.67147  
C 2.52398 -0.58701 -1.34999  
C 1.45969 -1.18801 -1.99821  
C 0.20368 -0.58735 -1.85538  
C 0.01498 0.60702 -1.15471  
C 1.14506 1.31578 -0.67712  
H 1.56782 -2.1381 -2.52027  
H -0.66497 -1.09602 -2.27497  
C 3.57307 0.77666 0.16719  
C 4.51773 -0.38102 -0.25814  
O 3.81595 1.51704 1.09481  
O 5.63138 -0.59607 0.16051  
N 3.81607 -1.11296 -1.18589  
C 4.33588 -2.28811 -1.84719  
H 3.74991 -3.17812 -1.58706  
H 4.33199 -2.15003 -2.93624  
H 5.36654 -2.41808 -1.50329  
C 0.88287 2.69455 -0.24265  
C 1.79134 3.76837 -0.22508  
C 1.30686 5.00964 0.19997  
C -0.88205 4.10881 0.41021  
C -0.01759 5.18554 0.55256  
H 1.99772 5.85246 0.22769  
H -1.95118 4.17087 0.60948  
H -0.39678 6.14717 0.8881  
C 3.20483 3.70719 -0.71083  
H 3.47687 4.66674 -1.16714  
H 3.90596 3.5086 0.10814  
H 3.35109 2.9222 -1.46198  
N -0.44094 2.91647 0.00992  
Rh -1.7078 1.34725 -0.40103  
Cl -3.55546 2.227 0.91347  
H -1.26358 1.45932 -1.90167  
C -0.47211 -2.07677 0.94281  
C 0.61937 -1.84008 1.7991

C 0.55361 -0.91171 2.82186  
C -0.65144 -0.22248 2.9787  
C -1.73357 -0.41848 2.12195  
C -1.64658 -1.33387 1.06607  
H 1.40264 -0.71842 3.4743  
H -0.74413 0.50976 3.77861  
H -2.63683 0.17859 2.2383  
C -0.04551 -3.08257 -0.02858  
C 1.43635 -3.38749 0.32681  
O -0.64122 -3.63082 -0.92884  
O 2.18117 -4.13914 -0.25989  
N 1.72439 -2.6238 1.4355  
C 3.02946 -2.54147 2.04666  
H 3.40473 -1.50785 2.038  
H 3.00258 -2.89769 3.08446  
H 3.70869 -3.17411 1.4666  
C -2.74462 -1.42487 0.06448  
C -3.58395 -2.54025 -0.03575  
C -4.601 -2.49404 -0.98664  
C -3.89479 -0.30915 -1.62279  
C -4.76301 -1.37451 -1.78931  
H -5.27456 -3.34512 -1.08439  
H -3.98065 0.60851 -2.1998  
H -5.55798 -1.31567 -2.52798  
C -3.39791 -3.7405 0.83732  
H -2.59319 -4.37552 0.4427  
H -3.13003 -3.46186 1.86378  
H -4.31304 -4.3427 0.87374  
N -2.90395 -0.33846 -0.7218

## 64

### Me<sup>e</sup>B'

C -2.33264 -0.62921 -0.77259  
C -2.50773 0.58443 -1.46725  
C -1.44774 1.22571 -2.08213  
C -0.16969 0.68452 -1.88822  
C 0.05582 -0.4916 -1.1669  
C -1.06363 -1.23868 -0.72194  
H -1.58046 2.16737 -2.61394

|    |          |          |          |             |          |          |          |
|----|----------|----------|----------|-------------|----------|----------|----------|
| H  | 0.68366  | 1.24308  | -2.276   | N           | -1.91497 | 2.14346  | 1.60052  |
| C  | -3.5335  | -0.79357 | 0.04374  | C           | -3.20323 | 1.90099  | 2.21107  |
| C  | -4.52115 | 0.30909  | -0.42913 | H           | -3.53303 | 0.86467  | 2.05251  |
| O  | -3.74992 | -1.50168 | 1.00563  | H           | -3.16771 | 2.1016   | 3.28942  |
| O  | -5.65357 | 0.47847  | -0.04047 | H           | -3.92214 | 2.5796   | 1.74066  |
| N  | -3.82491 | 1.06063  | -1.34311 | C           | 2.6501   | 1.56005  | 0.13442  |
| C  | -4.35027 | 2.2358   | -1.99517 | C           | 3.38286  | 2.74817  | 0.13536  |
| H  | -3.77151 | 3.12529  | -1.71883 | C           | 4.39309  | 2.8683   | -0.81974 |
| H  | -4.33797 | 2.11306  | -3.08599 | C           | 3.87995  | 0.68742  | -1.64086 |
| H  | -5.38304 | 2.35809  | -1.65563 | C           | 4.64614  | 1.84008  | -1.71459 |
| C  | -0.75744 | -2.59876 | -0.25934 | H           | 4.99089  | 3.7792   | -0.84558 |
| C  | -1.62201 | -3.70859 | -0.21562 | H           | 4.04569  | -0.16954 | -2.2887  |
| C  | -1.09116 | -4.91727 | 0.24736  | H           | 5.4378   | 1.91803  | -2.45508 |
| C  | 1.06261  | -3.93307 | 0.42869  | C           | 3.11112  | 3.84903  | 1.11012  |
| C  | 0.23826  | -5.03533 | 0.60635  | H           | 2.35673  | 4.53615  | 0.70466  |
| H  | -1.74978 | -5.78471 | 0.29645  | H           | 2.73252  | 3.46641  | 2.06545  |
| H  | 2.13782  | -3.94764 | 0.61004  | H           | 4.0209   | 4.42644  | 1.31173  |
| H  | 0.65175  | -5.97305 | 0.96794  | N           | 2.90088  | 0.56134  | -0.7401  |
| C  | -3.03217 | -3.72059 | -0.71521 |             |          |          |          |
| H  | -3.26032 | -4.70519 | -1.14116 | <b>88</b>   |          |          |          |
| H  | -3.75145 | -3.52075 | 0.08758  | <b>MeC'</b> |          |          |          |
| H  | -3.19878 | -2.96845 | -1.4951  | C           | -3.17425 | 0.65417  | 0.03771  |
| N  | 0.57356  | -2.77061 | -0.00178 | C           | -3.46002 | -0.031   | -1.16071 |
| Rh | 1.78812  | -1.16603 | -0.42102 | C           | -2.50306 | -0.76501 | -1.83486 |
| Cl | 3.86238  | -2.1453  | 0.54472  | C           | -1.19533 | -0.71347 | -1.34719 |
| H  | 2.04592  | -1.76021 | -1.8063  | C           | -0.8509  | -0.01706 | -0.18498 |
| C  | 0.32328  | 1.88385  | 1.07269  | C           | -1.87652 | 0.58796  | 0.58491  |
| C  | -0.75654 | 1.39646  | 1.83218  | H           | -2.73864 | -1.32269 | -2.74034 |
| C  | -0.63093 | 0.28186  | 2.64789  | H           | -0.42295 | -1.24095 | -1.90805 |
| C  | 0.6232   | -0.32332 | 2.70878  | C           | -4.33225 | 1.5184   | 0.28998  |
| C  | 1.7101   | 0.13578  | 1.95704  | C           | -5.37285 | 1.16351  | -0.80783 |
| C  | 1.55781  | 1.23251  | 1.09183  | O           | -4.51594 | 2.41501  | 1.08358  |
| H  | -1.47475 | -0.11147 | 3.21075  | O           | -6.4712  | 1.64895  | -0.9491  |
| H  | 0.76457  | -1.19297 | 3.34856  | N           | -4.77574 | 0.20679  | -1.5911  |
| H  | 2.67639  | -0.36301 | 2.03635  | C           | -5.3564  | -0.32769 | -2.79384 |
| C  | -0.18284 | 2.99635  | 0.26884  | H           | -4.76367 | -0.0457  | -3.67612 |
| C  | -1.68406 | 3.12043  | 0.65203  | H           | -5.42255 | -1.42239 | -2.74853 |
| O  | 0.36533  | 3.72196  | -0.5296  | H           | -6.36228 | 0.09304  | -2.88556 |
| O  | -2.48273 | 3.91258  | 0.21179  | C           | -1.42863 | 1.15822  | 1.86234  |

|    |          |          |          |              |          |          |          |
|----|----------|----------|----------|--------------|----------|----------|----------|
| C  | -2.19143 | 1.4353   | 3.01079  | C            | 0.63301  | -3.7655  | 0.18293  |
| C  | -1.55438 | 2.11962  | 4.05128  | C            | 0.21369  | -4.45366 | 1.33535  |
| C  | 0.52352  | 1.95825  | 2.91634  | C            | 0.92573  | -4.37666 | 2.51921  |
| C  | -0.21026 | 2.43908  | 3.99332  | C            | 2.07414  | -3.5804  | 2.52607  |
| H  | -2.13961 | 2.37178  | 4.93652  | C            | 2.49724  | -2.87564 | 1.40101  |
| H  | 1.61119  | 2.01239  | 2.85843  | C            | 1.76714  | -2.95237 | 0.21229  |
| H  | 0.28646  | 2.9732   | 4.79906  | H            | 0.6076   | -4.9096  | 3.41307  |
| C  | -3.57787 | 0.92733  | 3.26114  | H            | 2.64955  | -3.49319 | 3.44584  |
| H  | -3.63054 | 0.52996  | 4.2835   | H            | 3.35196  | -2.20296 | 1.45797  |
| H  | -4.33219 | 1.71442  | 3.16022  | C            | -0.33354 | -4.06231 | -0.87366 |
| H  | -3.85368 | 0.12032  | 2.57399  | C            | -1.3911  | -4.9905  | -0.20952 |
| N  | -0.07114 | 1.3264   | 1.90634  | O            | -0.37298 | -3.7283  | -2.03693 |
| Rh | 1.00117  | 0.26522  | 0.50474  | O            | -2.37612 | -5.46075 | -0.72374 |
| Cl | 3.23695  | 0.53418  | 1.58134  | N            | -0.96368 | -5.1711  | 1.09154  |
| H  | 0.63895  | -0.97276 | 1.30828  | C            | -1.66907 | -5.96225 | 2.06671  |
| C  | 0.86691  | 3.06019  | -0.89805 | H            | -1.05063 | -6.79917 | 2.41707  |
| C  | 2.07099  | 3.07166  | -0.70448 | H            | -1.96529 | -5.35034 | 2.92899  |
| C  | -0.52035 | 3.23683  | -1.17656 | H            | -2.56573 | -6.35709 | 1.57987  |
| C  | -1.32081 | 3.9944   | -0.30711 | C            | 2.18599  | -2.18042 | -0.9858  |
| C  | -1.09032 | 2.70063  | -2.33988 | C            | 2.8225   | -2.82645 | -2.05598 |
| C  | -2.6535  | 4.22893  | -0.61119 | C            | 3.19764  | -2.05403 | -3.14976 |
| H  | -0.87824 | 4.39791  | 0.60329  | C            | 2.29999  | -0.13347 | -2.06874 |
| C  | -2.42654 | 2.93696  | -2.63482 | C            | 2.93165  | -0.69252 | -3.16317 |
| H  | -0.47175 | 2.0941   | -3.00147 | H            | 3.69806  | -2.53045 | -3.9925  |
| C  | -3.20973 | 3.70626  | -1.77743 | H            | 2.05645  | 0.92815  | -2.02372 |
| H  | -3.27212 | 4.80716  | 0.07168  | H            | 3.20969  | -0.06626 | -4.00737 |
| H  | -2.86039 | 2.51478  | -3.54115 | C            | 3.07753  | -4.30128 | -2.0342  |
| H  | -4.25922 | 3.88889  | -2.00687 | H            | 3.81032  | -4.58007 | -2.80009 |
| C  | 3.4817   | 3.16972  | -0.54105 | H            | 3.45362  | -4.63913 | -1.06083 |
| C  | 4.34372  | 2.85953  | -1.60231 | H            | 2.15263  | -4.85579 | -2.24284 |
| C  | 4.0236   | 3.59969  | 0.67778  | N            | 1.93741  | -0.85695 | -0.9968  |
| C  | 5.71807  | 2.96446  | -1.44054 |              |          |          |          |
| H  | 3.92341  | 2.5459   | -2.55765 | <b>88</b>    |          |          |          |
| C  | 5.39687  | 3.71246  | 0.82953  | <b>MeC1'</b> |          |          |          |
| H  | 3.35216  | 3.82772  | 1.50306  | C            | 1.36743  | -1.55087 | 1.13672  |
| C  | 6.24665  | 3.38946  | -0.22471 | C            | 1.95237  | -0.85195 | 2.21385  |
| H  | 6.38037  | 2.71792  | -2.26869 | C            | 1.47715  | 0.37423  | 2.63541  |
| H  | 5.8084   | 4.04124  | 1.78186  | C            | 0.4233   | 0.9356   | 1.91389  |
| H  | 7.32509  | 3.47064  | -0.09922 | C            | -0.17877 | 0.28878  | 0.83301  |

|    |          |          |          |   |          |          |          |
|----|----------|----------|----------|---|----------|----------|----------|
| C  | 0.24977  | -1.00964 | 0.46404  | H | -5.92234 | -1.97864 | -3.00228 |
| H  | 1.95423  | 0.91952  | 3.44736  | H | -5.72144 | -4.24859 | -2.01718 |
| H  | 0.07932  | 1.93112  | 2.19292  | C | -3.01187 | 0.94555  | 2.624    |
| C  | 2.31175  | -2.61871 | 0.80321  | C | -2.60067 | 2.173    | 3.15362  |
| C  | 3.42372  | -2.55846 | 1.88765  | C | -3.63521 | 0.01694  | 3.47318  |
| O  | 2.3803   | -3.37481 | -0.14459 | C | -2.8107  | 2.46542  | 4.49538  |
| O  | 4.39075  | -3.28127 | 1.9616   | H | -2.12508 | 2.90368  | 2.49984  |
| N  | 3.10084  | -1.499   | 2.69803  | C | -3.84283 | 0.31311  | 4.81163  |
| C  | 3.98946  | -0.94869 | 3.69448  | H | -3.9594  | -0.9374  | 3.05927  |
| H  | 4.33428  | 0.04819  | 3.38623  | C | -3.42803 | 1.53817  | 5.32901  |
| H  | 3.49504  | -0.89305 | 4.6723   | H | -2.48782 | 3.42644  | 4.89201  |
| H  | 4.85584  | -1.61329 | 3.75628  | H | -4.32895 | -0.41696 | 5.45648  |
| C  | -0.43144 | -1.62946 | -0.68955 | H | -3.5873  | 1.76921  | 6.38083  |
| C  | -0.59877 | -3.00113 | -0.94777 | C | 2.89013  | 0.70512  | -1.04764 |
| C  | -1.18169 | -3.34921 | -2.17156 | C | 3.4279   | -0.52406 | -1.47046 |
| C  | -1.59779 | -1.06292 | -2.64143 | C | 2.90711  | -1.21229 | -2.55345 |
| C  | -1.64092 | -2.38999 | -3.05548 | C | 1.82624  | -0.63244 | -3.21634 |
| H  | -1.31279 | -4.40842 | -2.39747 | C | 1.2786   | 0.58314  | -2.81061 |
| H  | -2.07561 | -0.25121 | -3.19564 | C | 1.79601  | 1.26985  | -1.70938 |
| H  | -2.11132 | -2.66071 | -3.99768 | H | 3.31025  | -2.17406 | -2.86126 |
| C  | -0.35157 | -4.09593 | 0.04336  | H | 1.38476  | -1.15164 | -4.06627 |
| H  | -1.20992 | -4.78211 | 0.03626  | H | 0.42908  | 1.01122  | -3.34183 |
| H  | 0.54802  | -4.6735  | -0.1952  | C | 3.64655  | 1.11716  | 0.13477  |
| H  | -0.24021 | -3.71254 | 1.06382  | C | 4.71773  | 0.00801  | 0.33987  |
| N  | -1.01152 | -0.71088 | -1.50446 | O | 3.54733  | 2.08825  | 0.85092  |
| Rh | -1.56247 | 1.13375  | -0.34721 | O | 5.56848  | -0.02513 | 1.19804  |
| Cl | -3.11812 | 2.0237   | -2.1167  | N | 4.49764  | -0.92021 | -0.65528 |
| H  | -1.93212 | 2.33323  | 0.57118  | C | 5.30737  | -2.10177 | -0.8636  |
| C  | -3.1985  | -0.16747 | 0.27263  | H | 4.69396  | -3.00771 | -0.77622 |
| C  | -2.86316 | 0.56103  | 1.24119  | H | 5.79037  | -2.06393 | -1.84884 |
| C  | -3.86984 | -1.24895 | -0.39462 | H | 6.0693   | -2.11677 | -0.07943 |
| C  | -3.76026 | -2.53423 | 0.15938  | C | 1.22976  | 2.60629  | -1.40288 |
| C  | -4.64955 | -1.05572 | -1.54325 | C | 2.02203  | 3.75056  | -1.61499 |
| C  | -4.42335 | -3.607   | -0.42193 | C | 1.40711  | 4.99363  | -1.50502 |
| H  | -3.14605 | -2.67409 | 1.05019  | C | -0.65723 | 3.90364  | -1.05326 |
| C  | -5.31126 | -2.13487 | -2.11488 | C | 0.05243  | 5.07667  | -1.23593 |
| H  | -4.71029 | -0.05381 | -1.96719 | H | 1.99814  | 5.89505  | -1.66708 |
| C  | -5.19902 | -3.40877 | -1.56135 | H | -1.73074 | 3.91597  | -0.89064 |
| H  | -4.33449 | -4.60003 | 0.0172   | H | -0.46227 | 6.03238  | -1.18009 |



|    |          |          |          |    |          |          |          |
|----|----------|----------|----------|----|----------|----------|----------|
| C  | 3.47247  | 3.67867  | -1.98559 | Cl | 3.26603  | -1.25654 | -2.44484 |
| H  | 3.79234  | 4.61538  | -2.45675 | H  | 2.264    | -1.91515 | 0.27332  |
| H  | 4.09624  | 3.5268   | -1.09496 | C  | 3.03331  | 0.50962  | 0.25872  |
| H  | 3.6826   | 2.86008  | -2.68428 | C  | 3.07605  | -0.55231 | 0.95549  |
| N  | -0.08627 | 2.68611  | -1.1065  | C  | 3.39123  | 1.85931  | -0.0926  |
|    |          |          |          | C  | 3.09191  | 2.91151  | 0.78478  |
|    |          |          |          | C  | 4.02741  | 2.1305   | -1.3123  |
|    |          |          |          | C  | 3.43083  | 4.21643  | 0.44842  |
|    |          |          |          | H  | 2.58523  | 2.6905   | 1.7252   |
|    |          |          |          | C  | 4.37262  | 3.4374   | -1.63211 |
|    |          |          |          | H  | 4.23775  | 1.29677  | -1.98419 |
|    |          |          |          | C  | 4.07178  | 4.48119  | -0.75955 |
|    |          |          |          | H  | 3.19737  | 5.0292   | 1.13511  |
|    |          |          |          | H  | 4.87681  | 3.64358  | -2.57503 |
|    |          |          |          | H  | 4.34229  | 5.50379  | -1.0186  |
|    |          |          |          | C  | 3.59533  | -1.23644 | 2.11694  |
|    |          |          |          | C  | 3.36845  | -2.58857 | 2.39053  |
|    |          |          |          | C  | 4.37304  | -0.48473 | 3.01265  |
|    |          |          |          | C  | 3.90668  | -3.17778 | 3.52788  |
|    |          |          |          | H  | 2.76506  | -3.18203 | 1.70147  |
|    |          |          |          | C  | 4.9112   | -1.07817 | 4.14387  |
|    |          |          |          | H  | 4.55012  | 0.56951  | 2.80077  |
|    |          |          |          | C  | 4.67826  | -2.42656 | 4.40804  |
|    |          |          |          | H  | 3.72063  | -4.23189 | 3.72608  |
|    |          |          |          | H  | 5.51553  | -0.48336 | 4.82665  |
|    |          |          |          | H  | 5.09748  | -2.88909 | 5.29977  |
|    |          |          |          | C  | -2.87198 | -1.04225 | -0.8734  |
|    |          |          |          | C  | -3.64534 | 0.10622  | -1.11604 |
|    |          |          |          | C  | -3.39112 | 0.93815  | -2.19312 |
|    |          |          |          | C  | -2.33363 | 0.58648  | -3.03277 |
|    |          |          |          | C  | -1.55626 | -0.54789 | -2.80505 |
|    |          |          |          | C  | -1.80875 | -1.38107 | -1.71225 |
|    |          |          |          | H  | -3.96947 | 1.84352  | -2.35994 |
|    |          |          |          | H  | -2.09827 | 1.22489  | -3.88344 |
|    |          |          |          | H  | -0.73378 | -0.79622 | -3.47452 |
|    |          |          |          | C  | -3.36334 | -1.63987 | 0.36616  |
|    |          |          |          | C  | -4.53518 | -0.72388 | 0.82151  |
|    |          |          |          | O  | -3.01312 | -2.63268 | 0.96319  |
| Rh | 1.6145   | -0.75813 | -0.59657 | O  | -5.22606 | -0.86329 | 1.80392  |

**88**

**Me<sup>e</sup>TS<sub>Cl<sup>r</sup>-D<sup>r</sup></sub>**

|   |          |          |          |    |          |          |          |
|---|----------|----------|----------|----|----------|----------|----------|
| N | -4.62712 | 0.2736   | -0.1275  | C  | -0.07133 | 1.08985  | 2.8292   |
| C | -5.66849 | 1.27906  | -0.15158 | C  | 0.36176  | 0.02721  | 3.62792  |
| H | -5.2344  | 2.28627  | -0.16051 | C  | 0.61532  | -1.34741 | 1.70479  |
| H | -6.31348 | 1.13987  | -1.02919 | C  | 0.76509  | -1.17454 | 3.07403  |
| H | -6.25697 | 1.16041  | 0.76275  | H  | 0.33779  | 0.15002  | 4.71092  |
| C | -1.0037  | -2.62031 | -1.57564 | H  | 0.76237  | -2.30432 | 1.20363  |
| C | -1.61504 | -3.87086 | -1.78371 | H  | 1.08974  | -2.0108  | 3.68846  |
| C | -0.79037 | -4.99001 | -1.8338  | C  | -0.68726 | 2.27705  | 3.4999   |
| C | 1.10146  | -3.58141 | -1.52271 | H  | -1.2678  | 1.93617  | 4.36737  |
| C | 0.58268  | -4.84896 | -1.71855 | H  | 0.06307  | 2.99529  | 3.84796  |
| H | -1.23632 | -5.97167 | -1.99481 | H  | -1.3706  | 2.81313  | 2.83074  |
| H | 2.17404  | -3.40649 | -1.47505 | N  | 0.19524  | -0.34347 | 0.93225  |
| H | 1.25234  | -5.70216 | -1.79063 | Rh | -0.48036 | -0.7419  | -0.90576 |
| C | -3.09207 | -4.02646 | -1.98227 | H  | -2.89082 | -0.38194 | -2.04259 |
| H | -3.31851 | -5.01267 | -2.40399 | C  | -2.31954 | -1.00799 | -0.13729 |
| H | -3.62616 | -3.94411 | -1.02663 | C  | -3.24427 | -0.79261 | -1.08377 |
| H | -3.50169 | -3.26885 | -2.66172 | C  | -2.54606 | -1.42343 | 1.24757  |
| N | 0.32914  | -2.48473 | -1.42519 | C  | -3.05233 | -0.50298 | 2.17569  |

## 88 MeD'

|   |          |         |          |   |          |          |          |
|---|----------|---------|----------|---|----------|----------|----------|
| C | -0.24599 | 3.2626  | 0.39959  | C | -2.27279 | -2.73417 | 1.66643  |
| C | -0.63984 | 4.01181 | -0.72728 | C | -3.29476 | -0.88496 | 3.49031  |
| C | -1.10457 | 3.40954 | -1.88348 | H | -3.26641 | 0.51409  | 1.84141  |
| C | -1.11247 | 2.01256 | -1.92536 | C | -2.52998 | -3.11342 | 2.9791   |
| C | -0.72267 | 1.23207 | -0.83773 | H | -1.86816 | -3.43931 | 0.93892  |
| C | -0.35605 | 1.8582  | 0.37424  | C | -3.03659 | -2.1926  | 3.89409  |
| H | -1.40278 | 3.99867 | -2.7494  | H | -3.69751 | -0.16198 | 4.1993   |
| H | -1.41253 | 1.52313 | -2.85509 | H | -2.33316 | -4.13851 | 3.29046  |
| C | 0.46383  | 4.20018 | 1.27165  | H | -3.23728 | -2.49607 | 4.9207   |
| C | 0.2547   | 5.60595 | 0.64383  | C | -4.69198 | -1.04748 | -1.07664 |
| O | 1.18735  | 4.013   | 2.22717  | C | -5.35184 | -1.8211  | -0.10897 |
| O | 0.62341  | 6.66404 | 1.09384  | C | -5.46223 | -0.49383 | -2.10966 |
| N | -0.41463 | 5.38521 | -0.53703 | C | -6.72589 | -2.01018 | -0.17112 |
| C | -0.74815 | 6.42072 | -1.47965 | H | -4.78469 | -2.29048 | 0.69193  |
| H | -0.23842 | 6.26043 | -2.43952 | C | -6.83643 | -0.68229 | -2.16962 |
| H | -1.83123 | 6.46243 | -1.6539  | H | -4.96306 | 0.09903  | -2.87785 |
| H | -0.41426 | 7.37003 | -1.05025 | C | -7.4777  | -1.44095 | -1.19549 |
| C | -0.03829 | 0.90892 | 1.43771  | H | -7.21475 | -2.61781 | 0.58925  |
|   |          |         |          | H | -7.4081  | -0.23634 | -2.98248 |
|   |          |         |          | H | -8.55469 | -1.59494 | -1.23849 |
|   |          |         |          | C | 3.45876  | -0.93492 | -0.04942 |

|    |          |          |          |    |          |          |          |
|----|----------|----------|----------|----|----------|----------|----------|
| C  | 3.75018  | -0.59832 | 1.28256  | C  | -0.29735 | 0.963    | -1.27329 |
| C  | 3.57646  | 0.69146  | 1.75485  | C  | 0.32842  | 1.50312  | -0.12623 |
| C  | 3.09574  | 1.64614  | 0.85597  | H  | 0.55989  | 3.31078  | -3.61385 |
| C  | 2.77896  | 1.32079  | -0.46293 | H  | -0.80012 | 1.23798  | -3.34014 |
| C  | 2.94128  | 0.01303  | -0.9273  | C  | 2.2698   | 3.16444  | 0.47914  |
| H  | 3.7973   | 0.95945  | 2.78637  | C  | 2.93005  | 4.25526  | -0.4077  |
| H  | 2.94355  | 2.66433  | 1.21101  | O  | 2.74047  | 2.83322  | 1.54728  |
| H  | 2.37223  | 2.0785   | -1.13326 | O  | 3.89715  | 4.92417  | -0.12728 |
| C  | 3.78058  | -2.35384 | -0.22743 | N  | 2.21167  | 4.26732  | -1.57796 |
| C  | 4.24958  | -2.83722 | 1.17722  | C  | 2.55555  | 5.06457  | -2.72637 |
| O  | 3.7664   | -3.04711 | -1.21485 | H  | 2.85491  | 4.42922  | -3.57224 |
| O  | 4.60268  | -3.94395 | 1.49916  | H  | 1.71127  | 5.69322  | -3.03669 |
| N  | 4.20219  | -1.71542 | 1.99138  | H  | 3.39675  | 5.70291  | -2.44022 |
| C  | 4.60238  | -1.71074 | 3.37468  | C  | 0.1665   | 0.71885  | 1.09923  |
| H  | 5.47253  | -1.0599  | 3.53351  | C  | 0.29924  | 1.12474  | 2.43567  |
| H  | 3.78068  | -1.36668 | 4.01709  | C  | 0.31495  | 0.11514  | 3.40774  |
| H  | 4.86746  | -2.73836 | 3.64119  | C  | -0.2308  | -1.50185 | 1.75987  |
| C  | 2.53564  | -0.36304 | -2.30628 | C  | 0.1093   | -1.2117  | 3.0761   |
| C  | 3.47916  | -0.49322 | -3.33426 | H  | 0.47649  | 0.39974  | 4.44775  |
| C  | 3.0014   | -0.82672 | -4.59745 | H  | -0.53615 | -2.50055 | 1.44501  |
| C  | 0.7945   | -0.91107 | -3.71418 | H  | 0.16136  | -2.00498 | 3.81629  |
| C  | 1.6445   | -1.0388  | -4.79907 | N  | -0.21318 | -0.56357 | 0.81871  |
| H  | 3.70609  | -0.93311 | -5.42221 | Rh | -1.11315 | -0.79812 | -1.03104 |
| H  | -0.2745  | -1.11062 | -3.81114 | H  | -2.62772 | 2.04991  | -0.96994 |
| H  | 1.2516   | -1.31603 | -5.77385 | C  | -2.75771 | 0.07589  | -0.29634 |
| C  | 4.94257  | -0.3199  | -3.07416 | C  | -3.22893 | 1.32424  | -0.41708 |
| H  | 5.14996  | 0.55543  | -2.44578 | C  | -3.2898  | -1.03787 | 0.49652  |
| H  | 5.34061  | -1.20204 | -2.55342 | C  | -3.32392 | -0.95643 | 1.90003  |
| H  | 5.49816  | -0.20893 | -4.01251 | C  | -3.62836 | -2.25864 | -0.1136  |
| N  | 1.22578  | -0.56765 | -2.49439 | C  | -3.68251 | -2.05573 | 2.66463  |
| Cl | -0.20148 | -3.16278 | -1.22202 | H  | -3.04812 | -0.01275 | 2.37336  |
|    |          |          |          | C  | -3.97894 | -3.36248 | 0.66201  |
|    |          |          |          | H  | -3.63721 | -2.31356 | -1.2034  |
|    |          |          |          | C  | -4.00322 | -3.26701 | 2.04901  |
|    |          |          |          | H  | -3.70722 | -1.97421 | 3.75069  |
|    |          |          |          | H  | -4.2464  | -4.29917 | 0.17464  |
|    |          |          |          | H  | -4.27841 | -4.13047 | 2.65252  |
|    |          |          |          | C  | -4.48872 | 1.86907  | 0.10908  |
|    |          |          |          | C  | -5.614   | 1.08772  | 0.4087   |

**88**  
**MeD1'**

|   |          |         |          |   |          |          |         |
|---|----------|---------|----------|---|----------|----------|---------|
| C | 1.15699  | 2.63137 | -0.30212 | H | -4.2464  | -4.29917 | 0.17464 |
| C | 1.23695  | 3.25358 | -1.56196 | H | -4.27841 | -4.13047 | 2.65252 |
| C | 0.50601  | 2.80831 | -2.64911 | C | -4.48872 | 1.86907  | 0.10908 |
| C | -0.25142 | 1.64609 | -2.49295 | C | -5.614   | 1.08772  | 0.4087  |

|    |          |          |          |                                         |          |          |          |
|----|----------|----------|----------|-----------------------------------------|----------|----------|----------|
| C  | -4.58288 | 3.25499  | 0.30028  | H                                       | 0.03784  | 3.23987  | 2.07538  |
| C  | -6.77193 | 1.67088  | 0.90607  | H                                       | -0.45152 | 2.67327  | 3.67965  |
| H  | -5.5849  | 0.01418  | 0.23098  | C                                       | 3.67376  | -4.20831 | -0.82732 |
| C  | -5.73971 | 3.83869  | 0.80018  | H                                       | 4.32084  | -3.41322 | -1.21657 |
| H  | -3.72204 | 3.87768  | 0.05188  | H                                       | 3.79795  | -4.23566 | 0.26323  |
| C  | -6.84088 | 3.04673  | 1.11081  | H                                       | 4.03635  | -5.16352 | -1.22501 |
| H  | -7.63495 | 1.04428  | 1.12779  |                                         |          |          |          |
| H  | -5.78352 | 4.91764  | 0.94365  |                                         |          |          |          |
| H  | -7.7523  | 3.49892  | 1.49889  |                                         |          |          |          |
| C  | 3.06642  | -1.23782 | 0.25383  |                                         |          |          |          |
| C  | 3.87468  | -0.09642 | 0.41667  |                                         |          |          |          |
| C  | 4.09424  | 0.78625  | -0.62907 |                                         |          |          |          |
| C  | 3.43289  | 0.52657  | -1.83113 |                                         |          |          |          |
| C  | 2.60092  | -0.58079 | -1.99703 |                                         |          |          |          |
| C  | 2.42514  | -1.50124 | -0.95894 |                                         |          |          |          |
| H  | 4.73559  | 1.65876  | -0.51046 |                                         |          |          |          |
| H  | 3.56403  | 1.21636  | -2.66503 |                                         |          |          |          |
| H  | 2.08648  | -0.74511 | -2.94308 |                                         |          |          |          |
| C  | 3.01743  | -1.91215 | 1.54933  |                                         |          |          |          |
| C  | 3.87069  | -1.02804 | 2.50204  |                                         |          |          |          |
| O  | 2.46601  | -2.93422 | 1.89439  |                                         |          |          |          |
| O  | 4.06062  | -1.21047 | 3.68021  |                                         |          |          |          |
| N  | 4.37027  | -0.00807 | 1.71946  |                                         |          |          |          |
| C  | 5.2421   | 1.03537  | 2.21081  |                                         |          |          |          |
| H  | 6.21498  | 0.99599  | 1.70336  |                                         |          |          |          |
| H  | 4.78436  | 2.02091  | 2.06393  |                                         |          |          |          |
| H  | 5.3883   | 0.85498  | 3.27978  |                                         |          |          |          |
| C  | 1.6302   | -2.73082 | -1.21182 |                                         |          |          |          |
| C  | 2.2365   | -3.99879 | -1.19143 |                                         |          |          |          |
| C  | 1.44681  | -5.08949 | -1.54974 |                                         |          |          |          |
| C  | -0.37904 | -3.61899 | -1.94639 |                                         |          |          |          |
| C  | 0.12816  | -4.90867 | -1.9347  |                                         |          |          |          |
| H  | 1.88888  | -6.08597 | -1.54395 |                                         |          |          |          |
| H  | -1.39294 | -3.40402 | -2.28481 |                                         |          |          |          |
| H  | -0.49577 | -5.74588 | -2.23741 |                                         |          |          |          |
| N  | 0.3477   | -2.55431 | -1.58092 |                                         |          |          |          |
| Cl | -2.16209 | -1.00959 | -3.14799 |                                         |          |          |          |
| C  | 0.29825  | 2.55196  | 2.88628  |                                         |          |          |          |
| H  | 1.27006  | 2.85845  | 3.28664  |                                         |          |          |          |
|    |          |          |          | <b>88</b>                               |          |          |          |
|    |          |          |          | <b>Me<sup>e</sup>TS<sub>D1'</sub>-A</b> |          |          |          |
|    |          |          |          | C                                       | 0.58555  | 2.46267  | -0.38865 |
|    |          |          |          | C                                       | 0.35271  | 2.964    | -1.67847 |
|    |          |          |          | C                                       | -0.57016 | 2.37792  | -2.5298  |
|    |          |          |          | C                                       | -1.19798 | 1.21326  | -2.10184 |
|    |          |          |          | C                                       | -0.93948 | 0.63886  | -0.8459  |
|    |          |          |          | C                                       | -0.09334 | 1.31741  | 0.0676   |
|    |          |          |          | H                                       | -0.75549 | 2.77213  | -3.52778 |
|    |          |          |          | H                                       | -1.86679 | 0.69003  | -2.78138 |
|    |          |          |          | C                                       | 1.81528  | 3.09623  | 0.0784   |
|    |          |          |          | C                                       | 2.23387  | 4.08089  | -1.04831 |
|    |          |          |          | O                                       | 2.50141  | 2.91175  | 1.06139  |
|    |          |          |          | O                                       | 3.24282  | 4.74932  | -1.08262 |
|    |          |          |          | N                                       | 1.2536   | 3.9956   | -2.00562 |
|    |          |          |          | C                                       | 1.3524   | 4.61394  | -3.30242 |
|    |          |          |          | H                                       | 1.50337  | 3.85713  | -4.08664 |
|    |          |          |          | H                                       | 0.44827  | 5.18986  | -3.53536 |
|    |          |          |          | H                                       | 2.21451  | 5.28715  | -3.28064 |
|    |          |          |          | C                                       | 0.18649  | 0.62936  | 1.33131  |
|    |          |          |          | C                                       | 0.49021  | 1.2067   | 2.57371  |
|    |          |          |          | C                                       | 0.83052  | 0.33787  | 3.61424  |
|    |          |          |          | C                                       | 0.36184  | -1.52768 | 2.22038  |
|    |          |          |          | C                                       | 0.8081   | -1.03461 | 3.43792  |
|    |          |          |          | H                                       | 1.09477  | 0.76292  | 4.58254  |
|    |          |          |          | H                                       | 0.24601  | -2.5956  | 2.04043  |
|    |          |          |          | H                                       | 1.09393  | -1.71824 | 4.23221  |
|    |          |          |          | C                                       | 0.34473  | 2.66444  | 2.87792  |
|    |          |          |          | H                                       | -0.25445 | 2.77764  | 3.79194  |
|    |          |          |          | H                                       | 1.31767  | 3.14217  | 3.03798  |
|    |          |          |          | H                                       | -0.17131 | 3.20469  | 2.07687  |
|    |          |          |          | N                                       | 0.04881  | -0.71868 | 1.2085   |

|    |          |          |          |             |          |          |          |
|----|----------|----------|----------|-------------|----------|----------|----------|
| Rh | -0.87176 | -1.34519 | -0.5468  | N           | 4.62037  | 0.9263   | 0.40513  |
| H  | -3.43167 | -0.54603 | -1.91597 | C           | 5.38598  | 2.15107  | 0.32634  |
| C  | -2.59039 | -0.2255  | -0.03899 | H           | 6.08587  | 2.11077  | -0.51832 |
| C  | -3.6461  | -0.2526  | -0.887   | H           | 4.72798  | 3.02356  | 0.23049  |
| C  | -2.75266 | 0.24085  | 1.35772  | H           | 5.95107  | 2.23175  | 1.25943  |
| C  | -2.92814 | 1.60388  | 1.62375  | C           | 1.82092  | -2.85062 | -0.74722 |
| C  | -2.81789 | -0.66347 | 2.42323  | C           | 2.6845   | -3.95487 | -0.65925 |
| C  | -3.16253 | 2.05176  | 2.91904  | C           | 2.10706  | -5.20744 | -0.46586 |
| H  | -2.90233 | 2.30913  | 0.79164  | C           | -0.05335 | -4.21305 | -0.51057 |
| C  | -3.05653 | -0.21754 | 3.71862  | C           | 0.72916  | -5.34819 | -0.38982 |
| H  | -2.69753 | -1.72737 | 2.21551  | H           | 2.75397  | -6.08177 | -0.39577 |
| C  | -3.22581 | 1.14215  | 3.9714   | H           | -1.14107 | -4.25495 | -0.5046  |
| H  | -3.3056  | 3.11553  | 3.10637  | H           | 0.26311  | -6.32158 | -0.2605  |
| H  | -3.11442 | -0.93576 | 4.53555  | C           | 4.17102  | -3.82279 | -0.77478 |
| H  | -3.41571 | 1.49039  | 4.98559  | H           | 4.4606   | -3.08349 | -1.53104 |
| C  | -5.06357 | 0.05314  | -0.67701 | H           | 4.60494  | -3.50715 | 0.18334  |
| C  | -5.72507 | 0.14255  | 0.56087  | H           | 4.62438  | -4.78365 | -1.04442 |
| C  | -5.83268 | 0.25123  | -1.83769 | N           | 0.48546  | -2.9958  | -0.66618 |
| C  | -7.08026 | 0.43892  | 0.62192  | Cl          | -1.68461 | -2.14146 | -2.6617  |
| H  | -5.18346 | -0.03692 | 1.48606  |             |          |          |          |
| C  | -7.18431 | 0.55697  | -1.7747  | <b>34</b>   |          |          |          |
| H  | -5.34475 | 0.16072  | -2.80879 | <b>PPh3</b> |          |          |          |
| C  | -7.8169  | 0.65647  | -0.53938 | P           | -0.00206 | -0.00199 | 1.27864  |
| H  | -7.56809 | 0.49798  | 1.5941   | C           | -1.5784  | -0.46657 | 0.44613  |
| H  | -7.7468  | 0.71198  | -2.69435 | C           | -2.75535 | 0.05652  | 0.99329  |
| H  | -8.87853 | 0.89156  | -0.4814  | C           | -1.66557 | -1.28319 | -0.68443 |
| C  | 3.21054  | -0.80356 | -0.20907 | C           | -3.99036 | -0.21609 | 0.41696  |
| C  | 3.77581  | 0.43072  | -0.58881 | H           | -2.69793 | 0.68688  | 1.88243  |
| C  | 3.47626  | 1.00792  | -1.81335 | C           | -2.90347 | -1.56737 | -1.25422 |
| C  | 2.57274  | 0.32929  | -2.63751 | H           | -0.75788 | -1.69904 | -1.12258 |
| C  | 2.0052   | -0.89185 | -2.27645 | C           | -4.06626 | -1.03302 | -0.708   |
| C  | 2.33745  | -1.49023 | -1.05445 | H           | -4.89732 | 0.20216  | 0.8512   |
| H  | 3.92248  | 1.95247  | -2.12291 | H           | -2.95838 | -2.20739 | -2.13387 |
| H  | 2.29699  | 0.77261  | -3.59413 | H           | -5.03312 | -1.25535 | -1.15705 |
| H  | 1.2943   | -1.38727 | -2.9377  | C           | 1.1903   | -1.1329  | 0.44539  |
| C  | 3.67024  | -1.08195 | 1.14956  | C           | 1.94585  | -0.79567 | -0.68063 |
| C  | 4.59083  | 0.1142   | 1.52114  | C           | 1.32544  | -2.41544 | 0.989    |
| O  | 3.439    | -2.01448 | 1.88822  | C           | 2.81479  | -1.72266 | -1.2494  |
| O  | 5.18058  | 0.27612  | 2.56141  | H           | 1.85284  | 0.19915  | -1.11691 |

|   |          |          |          |   |         |          |          |
|---|----------|----------|----------|---|---------|----------|----------|
| C | 2.18394  | -3.34531 | 0.41432  | C | 3.08395 | -3.60958 | -2.66772 |
| H | 0.7472   | -2.68472 | 1.87482  | H | 1.35677 | -2.56298 | -1.90466 |
| C | 2.93393  | -2.99792 | -0.70615 | C | 4.46989 | -3.63603 | -2.75613 |
| H | 3.40003  | -1.44666 | -2.12563 | H | 6.31512 | -2.66544 | -2.19721 |
| H | 2.27565  | -4.34055 | 0.84693  | H | 2.4899  | -4.38452 | -3.14869 |
| H | 3.61448  | -3.72077 | -1.15354 | H | 4.9666  | -4.43344 | -3.30738 |
| C | 0.38387  | 1.59608  | 0.44631  | C | 3.24955 | -0.54633 | 1.25584  |
| C | -0.28106 | 2.08259  | -0.6824  | C | 3.96976 | 0.4179   | 1.9623   |
| C | 1.42631  | 2.35283  | 0.99355  | C | 3.12926 | -1.83059 | 1.80512  |
| C | 0.09292  | 3.29687  | -1.25163 | C | 4.52564 | 0.11926  | 3.20437  |
| H | -1.09643 | 1.50737  | -1.12159 | H | 4.12741 | 1.40743  | 1.54085  |
| C | 1.80791  | 3.55922  | 0.41847  | C | 3.68879 | -2.12713 | 3.04111  |
| H | 1.94423  | 1.98587  | 1.8816   | H | 2.60267 | -2.61345 | 1.25686  |
| C | 1.13824  | 4.03512  | -0.70567 | C | 4.3792  | -1.14834 | 3.75169  |
| H | -0.43443 | 3.66623  | -2.13023 | H | 5.08333 | 0.88655  | 3.73915  |
| H | 2.62415  | 4.13419  | 0.85333  | H | 3.59358 | -3.13381 | 3.44683  |
| H | 1.4295   | 4.98392  | -1.15373 | H | 4.81469 | -1.38008 | 4.72239  |

## 99 P-C1

|    |         |          |          |   |          |          |          |
|----|---------|----------|----------|---|----------|----------|----------|
| Rh | 0.02171 | -0.2046  | -0.29995 | C | 0.04532  | 0.41558  | 1.55669  |
| P  | 2.40356 | -0.27257 | -0.35944 | C | 0.11238  | -0.58345 | 2.52794  |
| Cl | 0.04893 | -0.40319 | -2.82888 | C | 0.20768  | -0.24728 | 3.87312  |
| C  | 3.0585  | 1.28129  | -1.06847 | C | 0.20882  | 1.10787  | 4.21586  |
| C  | 3.00602 | 2.48265  | -0.34922 | C | 0.10258  | 2.10739  | 3.25766  |
| C  | 3.45312 | 1.31532  | -2.40922 | C | 0.00689  | 1.7768   | 1.88707  |
| C  | 3.39364 | 3.67907  | -0.94007 | H | 0.28291  | -1.01171 | 4.6457   |
| H  | 2.63097 | 2.49227  | 0.67387  | H | 0.29388  | 1.38888  | 5.26452  |
| C  | 3.82521 | 2.51773  | -3.00295 | H | 0.11313  | 3.13803  | 3.59392  |
| H  | 3.45614 | 0.39932  | -2.99751 | C | 0.03114  | -2.01558 | 0.61556  |
| C  | 3.80707 | 3.69861  | -2.26924 | O | 0.00685  | -3.1209  | 0.1038   |
| H  | 3.35288 | 4.60198  | -0.36292 | N | 0.06574  | -1.87695 | 2.01364  |
| H  | 4.12832 | 2.52748  | -4.04854 | C | -0.01847 | -3.02724 | 2.88278  |
| H  | 4.10454 | 4.63686  | -2.73526 | H | 0.8844   | -3.11693 | 3.50587  |
| C  | 3.19612 | -1.59471 | -1.34833 | H | -0.89846 | -2.94771 | 3.5386   |
| C  | 4.59482 | -1.63326 | -1.42666 | H | -0.11352 | -3.91407 | 2.25148  |
| C  | 2.44152 | -2.5898  | -1.96834 | C | -0.10335 | 2.70498  | 0.74134  |
| C  | 5.22825 | -2.64512 | -2.13452 | C | -0.28088 | 4.10529  | 0.79438  |
| H  | 5.18922 | -0.86471 | -0.92996 | C | -0.27682 | 4.80228  | -0.41459 |
|    |         |          |          | C | 0.0154   | 2.77409  | -1.60286 |
|    |         |          |          | C | -0.10015 | 4.15506  | -1.62621 |
|    |         |          |          | H | -0.4127  | 5.88431  | -0.38911 |

|   |          |          |          |             |          |          |          |
|---|----------|----------|----------|-------------|----------|----------|----------|
| H | 0.12488  | 2.17382  | -2.50983 | H           | -3.33334 | -0.06603 | 4.54398  |
| H | -0.07658 | 4.69927  | -2.56728 | H           | -4.2777  | -2.36355 | 4.7264   |
| C | -0.50319 | 4.88664  | 2.05583  |             |          |          |          |
| H | -1.29504 | 4.44972  | 2.67745  |             |          |          |          |
| H | 0.40142  | 4.95211  | 2.67629  |             |          |          |          |
| H | -0.80152 | 5.91383  | 1.81372  |             |          |          |          |
| N | -0.0034  | 2.08588  | -0.46558 |             |          |          |          |
| P | -2.35741 | -0.42487 | -0.30526 |             |          |          |          |
| C | -3.08704 | -1.58066 | -1.52404 |             |          |          |          |
| C | -2.33976 | -2.64197 | -2.03791 |             |          |          |          |
| C | -4.43195 | -1.44072 | -1.88504 |             |          |          |          |
| C | -2.93822 | -3.55185 | -2.90513 |             |          |          |          |
| H | -1.29802 | -2.76148 | -1.75049 |             |          |          |          |
| C | -5.02195 | -2.35071 | -2.7534  |             |          |          |          |
| H | -5.0206  | -0.61474 | -1.48442 |             |          |          |          |
| C | -4.2731  | -3.40679 | -3.26608 |             |          |          |          |
| H | -2.34967 | -4.3754  | -3.30553 |             |          |          |          |
| H | -6.06806 | -2.23316 | -3.03199 |             |          |          |          |
| H | -4.73304 | -4.11813 | -3.95081 |             |          |          |          |
| C | -3.23733 | 1.1367   | -0.69148 |             |          |          |          |
| C | -4.18196 | 1.7421   | 0.13898  |             |          |          |          |
| C | -2.93377 | 1.72193  | -1.92779 |             |          |          |          |
| C | -4.7982  | 2.92904  | -0.25092 |             |          |          |          |
| H | -4.45433 | 1.28127  | 1.0872   |             |          |          |          |
| C | -3.55299 | 2.90403  | -2.31144 |             |          |          |          |
| H | -2.2088  | 1.23705  | -2.58697 |             |          |          |          |
| C | -4.48206 | 3.51401  | -1.47154 |             |          |          |          |
| H | -5.53556 | 3.3915   | 0.40371  |             |          |          |          |
| H | -3.30783 | 3.35203  | -3.27354 |             |          |          |          |
| H | -4.96633 | 4.4414   | -1.77399 |             |          |          |          |
| C | -3.05213 | -1.01842 | 1.28549  |             |          |          |          |
| C | -3.56804 | -2.31361 | 1.40075  |             |          |          |          |
| C | -2.96752 | -0.22218 | 2.43499  |             |          |          |          |
| C | -4.00362 | -2.79315 | 2.63233  |             |          |          |          |
| H | -3.6248  | -2.95634 | 0.52323  |             |          |          |          |
| C | -3.41095 | -0.70108 | 3.66255  |             |          |          |          |
| H | -2.53854 | 0.77869  | 2.37766  |             |          |          |          |
| C | -3.93148 | -1.98761 | 3.76471  |             |          |          |          |
| H | -4.40428 | -3.80311 | 2.70383  |             |          |          |          |
|   |          |          |          | <b>89</b>   |          |          |          |
|   |          |          |          | <b>P-C2</b> |          |          |          |
|   |          |          |          | C           | 0.86958  | 0.28507  | 1.36817  |
|   |          |          |          | C           | 0.28116  | 0.98883  | 2.41983  |
|   |          |          |          | C           | 0.83819  | 0.93761  | 3.69239  |
|   |          |          |          | C           | 2.00355  | 0.18569  | 3.87235  |
|   |          |          |          | C           | 2.61228  | -0.48767 | 2.82293  |
|   |          |          |          | C           | 2.05424  | -0.44632 | 1.52534  |
|   |          |          |          | H           | 0.38578  | 1.46154  | 4.53345  |
|   |          |          |          | H           | 2.45064  | 0.13192  | 4.86381  |
|   |          |          |          | H           | 3.52488  | -1.03254 | 3.03328  |
|   |          |          |          | C           | -1.35484 | 1.50241  | 0.75554  |
|   |          |          |          | O           | -2.4405  | 1.931    | 0.42403  |
|   |          |          |          | N           | -0.87559 | 1.68385  | 2.06335  |
|   |          |          |          | C           | -1.63534 | 2.43595  | 3.03446  |
|   |          |          |          | H           | -2.03945 | 1.77881  | 3.82017  |
|   |          |          |          | H           | -1.00135 | 3.19805  | 3.50865  |
|   |          |          |          | H           | -2.45657 | 2.92713  | 2.50551  |
|   |          |          |          | C           | 2.59671  | -1.05418 | 0.28853  |
|   |          |          |          | C           | 3.76627  | -1.83747 | 0.16179  |
|   |          |          |          | C           | 4.08584  | -2.32252 | -1.10723 |
|   |          |          |          | C           | 2.16484  | -1.2711  | -2.01214 |
|   |          |          |          | C           | 3.29026  | -2.05545 | -2.20964 |
|   |          |          |          | H           | 4.98763  | -2.92592 | -1.21857 |
|   |          |          |          | H           | 1.47961  | -1.00026 | -2.819   |
|   |          |          |          | H           | 3.53389  | -2.43833 | -3.19759 |
|   |          |          |          | C           | 4.69878  | -2.16257 | 1.28978  |
|   |          |          |          | H           | 5.13791  | -1.25459 | 1.72588  |
|   |          |          |          | H           | 4.20366  | -2.71347 | 2.10037  |
|   |          |          |          | H           | 5.52596  | -2.78498 | 0.92815  |
|   |          |          |          | N           | 1.84239  | -0.79625 | -0.81283 |
|   |          |          |          | Rh          | 0.0079   | 0.4978   | -0.37515 |
|   |          |          |          | Cl          | -0.58487 | 0.51477  | -2.8465  |
|   |          |          |          | C           | 1.65511  | 2.30422  | -0.66018 |
|   |          |          |          | C           | 0.56585  | 2.86774  | -0.7747  |
|   |          |          |          | C           | 3.05272  | 2.00001  | -0.62055 |





|    |          |          |          |            |          |          |          |
|----|----------|----------|----------|------------|----------|----------|----------|
| C  | 0.54082  | -3.79072 | -2.17611 | C          | -3.01095 | 3.60134  | -2.16094 |
| H  | 1.11312  | -5.67762 | -1.3208  | H          | -1.22126 | 2.59825  | -1.49136 |
| H  | 0.05315  | -1.72244 | -2.65627 | C          | -5.08875 | 2.44348  | -1.76276 |
| H  | 0.39419  | -4.16751 | -3.1849  | H          | -4.9369  | 0.54868  | -0.75827 |
| C  | 1.55911  | -5.08564 | 1.21965  | C          | -4.39524 | 3.54454  | -2.2635  |
| H  | 2.50902  | -4.773   | 1.67326  | H          | -2.46746 | 4.46241  | -2.54548 |
| H  | 0.8238   | -5.19157 | 2.02844  | H          | -6.17438 | 2.39887  | -1.83595 |
| H  | 1.71384  | -6.08142 | 0.7878   | H          | -4.94105 | 4.3622   | -2.73267 |
| N  | 0.50626  | -1.96098 | -0.66704 | C          | -2.93574 | 0.15151  | 1.41992  |
| Rh | 0.36041  | 0.12968  | -0.24264 | C          | -3.82863 | -0.81505 | 1.88689  |
| Cl | 0.30583  | 0.75058  | -2.70022 | C          | -2.69152 | 1.28239  | 2.21086  |
| C  | 2.38082  | 0.45767  | -0.13901 | C          | -4.44135 | -0.67117 | 3.12962  |
| C  | 2.01627  | 1.67357  | 0.13918  | H          | -4.06828 | -1.68388 | 1.27581  |
| C  | 3.45747  | -0.45653 | -0.4066  | C          | -3.31214 | 1.42712  | 3.44539  |
| C  | 3.64631  | -0.94915 | -1.70724 | H          | -2.03168 | 2.07056  | 1.84233  |
| C  | 4.27052  | -0.91937 | 0.63744  | C          | -4.18153 | 0.44527  | 3.91437  |
| C  | 4.654    | -1.87057 | -1.95554 | H          | -5.13474 | -1.4354  | 3.4781   |
| H  | 2.9875   | -0.59374 | -2.50121 | H          | -3.12288 | 2.32016  | 4.04055  |
| C  | 5.26341  | -1.85589 | 0.37959  | H          | -4.66389 | 0.55836  | 4.88408  |
| H  | 4.09959  | -0.54816 | 1.64798  | C          | -2.66897 | -1.43627 | -1.01709 |
| C  | 5.45949  | -2.33046 | -0.91489 | C          | -3.11434 | -1.43662 | -2.34152 |
| H  | 4.80663  | -2.24151 | -2.96782 | C          | -2.50014 | -2.66288 | -0.3598  |
| H  | 5.89072  | -2.21447 | 1.19425  | C          | -3.41666 | -2.63561 | -2.98183 |
| H  | 6.24176  | -3.06153 | -1.11335 | H          | -3.21365 | -0.49413 | -2.87872 |
| C  | 2.52792  | 2.98552  | -0.28052 | C          | -2.81459 | -3.85692 | -0.9963  |
| C  | 2.79309  | 3.20619  | -1.63515 | H          | -2.10704 | -2.68336 | 0.65841  |
| C  | 2.79252  | 3.99258  | 0.65181  | C          | -3.2775  | -3.84537 | -2.31001 |
| C  | 3.32697  | 4.42327  | -2.04545 | H          | -3.76309 | -2.62019 | -4.01396 |
| H  | 2.54285  | 2.42484  | -2.35272 | H          | -2.68387 | -4.8013  | -0.46921 |
| C  | 3.33658  | 5.19967  | 0.23817  | H          | -3.52102 | -4.78067 | -2.81193 |
| H  | 2.57444  | 3.81969  | 1.70602  |            |          |          |          |
| C  | 3.60221  | 5.41756  | -1.11264 | <b>89</b>  |          |          |          |
| H  | 3.52487  | 4.5948   | -3.10227 | <b>P-D</b> |          |          |          |
| H  | 3.54881  | 5.97749  | 0.96999  | C          | 0.50923  | 0.53121  | 1.33231  |
| H  | 4.0202   | 6.36921  | -1.43784 | C          | 0.99428  | 1.7764   | 1.73442  |
| P  | -2.09093 | 0.10433  | -0.21862 | C          | 1.00311  | 2.08523  | 3.0972   |
| C  | -2.99482 | 1.44942  | -1.07294 | C          | 0.59973  | 1.14602  | 4.04096  |
| C  | -2.30529 | 2.55634  | -1.56874 | C          | 0.25018  | -0.13744 | 3.64855  |
| C  | -4.39242 | 1.40402  | -1.16199 | C          | 0.23392  | -0.47385 | 2.28594  |

|    |          |          |          |   |          |          |          |
|----|----------|----------|----------|---|----------|----------|----------|
| H  | 1.35192  | 3.06783  | 3.41408  | C | 5.18498  | 0.43125  | -1.43496 |
| H  | 0.60078  | 1.40659  | 5.09756  | C | 5.23747  | 1.37697  | 0.7733   |
| H  | -0.02562 | -0.86039 | 4.4083   | C | 6.5711   | 0.32503  | -1.41932 |
| C  | 2.53427  | 2.45959  | -0.06866 | H | 4.62262  | 0.12293  | -2.31502 |
| O  | 3.09563  | 3.39752  | -0.60776 | C | 6.62201  | 1.26963  | 0.79236  |
| N  | 1.46823  | 2.7095   | 0.79152  | H | 4.70962  | 1.79752  | 1.63156  |
| C  | 1.07899  | 4.10435  | 0.91458  | C | 7.29443  | 0.73939  | -0.3054  |
| H  | 0.10838  | 4.15473  | 1.42073  | H | 7.08978  | -0.07754 | -2.28846 |
| H  | 1.81957  | 4.69873  | 1.46936  | H | 7.17983  | 1.60211  | 1.667    |
| H  | 0.996    | 4.53499  | -0.08929 | H | 8.38033  | 0.65667  | -0.29508 |
| C  | -0.03655 | -1.78112 | 1.69479  | P | -2.33568 | 0.35005  | -0.47757 |
| C  | -0.19708 | -3.03213 | 2.32709  | C | -3.01154 | 1.98326  | 0.01657  |
| C  | -0.36286 | -4.15041 | 1.51496  | C | -2.25224 | 3.12988  | -0.23539 |
| C  | -0.22615 | -2.79374 | -0.42408 | C | -4.26741 | 2.11703  | 0.62306  |
| C  | -0.38154 | -4.04869 | 0.13019  | C | -2.74618 | 4.38619  | 0.10586  |
| H  | -0.47769 | -5.12558 | 1.98821  | H | -1.27667 | 3.03295  | -0.71313 |
| H  | -0.21213 | -2.62981 | -1.50109 | C | -4.75502 | 3.37289  | 0.96348  |
| H  | -0.50504 | -4.91971 | -0.50693 | H | -4.86066 | 1.23261  | 0.85623  |
| C  | -0.18538 | -3.21772 | 3.81248  | C | -3.99499 | 4.51052  | 0.70375  |
| H  | 0.72719  | -2.81668 | 4.27205  | H | -2.14515 | 5.27074  | -0.1011  |
| H  | -1.04505 | -2.72493 | 4.28865  | H | -5.73177 | 3.4637   | 1.43645  |
| H  | -0.2414  | -4.28348 | 4.0627   | H | -4.37767 | 5.49397  | 0.97246  |
| N  | -0.05449 | -1.71075 | 0.33786  | C | -3.08041 | -0.77786 | 0.76169  |
| Rh | 0.15845  | 0.1204   | -0.55998 | C | -3.61075 | -2.02174 | 0.40651  |
| Cl | 0.27709  | 1.79224  | -2.23056 | C | -2.98207 | -0.44931 | 2.12025  |
| C  | 2.19827  | 0.02776  | -0.59499 | C | -4.05189 | -2.90778 | 1.38519  |
| C  | 3.01512  | 1.05649  | -0.30096 | H | -3.68692 | -2.29829 | -0.64551 |
| C  | 2.63914  | -1.32773 | -0.95158 | C | -3.42365 | -1.33498 | 3.09632  |
| C  | 2.42239  | -1.81953 | -2.2474  | H | -2.56714 | 0.51565  | 2.41503  |
| C  | 3.18862  | -2.18764 | 0.00905  | C | -3.95977 | -2.56796 | 2.73144  |
| C  | 2.75378  | -3.13052 | -2.57388 | H | -4.47051 | -3.86923 | 1.09128  |
| H  | 2.00163  | -1.14476 | -2.99662 | H | -3.35216 | -1.05595 | 4.14756  |
| C  | 3.50516  | -3.50133 | -0.31662 | H | -4.3106  | -3.26033 | 3.49543  |
| H  | 3.36998  | -1.80451 | 1.01442  | C | -3.20251 | -0.08683 | -2.0338  |
| C  | 3.28823  | -3.97928 | -1.60751 | C | -4.59393 | -0.01561 | -2.16619 |
| H  | 2.59578  | -3.49157 | -3.58968 | C | -2.4384  | -0.53364 | -3.1143  |
| H  | 3.93433  | -4.15664 | 0.4406   | C | -5.20688 | -0.39482 | -3.35301 |
| H  | 3.54429  | -5.00695 | -1.86114 | H | -5.2036  | 0.33736  | -1.3344  |
| C  | 4.49839  | 0.95178  | -0.33584 | C | -3.0532  | -0.91296 | -4.30455 |

|   |          |          |          |
|---|----------|----------|----------|
| H | -1.3499  | -0.55093 | -3.03258 |
| C | -4.43638 | -0.84567 | -4.42325 |
| H | -6.29    | -0.33526 | -3.44669 |
| H | -2.44646 | -1.24926 | -5.14343 |
| H | -4.91873 | -1.13894 | -5.3544  |

**28**  
**2a**

|   |          |          |          |
|---|----------|----------|----------|
| C | 4.68926  | -0.07531 | -0.00008 |
| C | 5.70739  | -0.72434 | -0.00015 |
| H | 6.60981  | -1.29667 | -0.00019 |
| C | 3.4428   | 0.678    | -0.00001 |
| H | 3.41156  | 1.34267  | -0.87844 |
| H | 3.41168  | 1.34273  | 0.87838  |
| C | 2.20566  | -0.22157 | 0.0001   |
| H | 2.23992  | -0.88327 | 0.87956  |
| H | 2.23986  | -0.88341 | -0.87925 |
| C | 0.91215  | 0.57627  | 0.00008  |
| H | 0.89035  | 1.24226  | -0.88005 |
| H | 0.89038  | 1.24237  | 0.88012  |
| C | -0.32881 | -0.30243 | 0.00016  |
| H | -0.30602 | -0.96851 | 0.87988  |
| H | -0.30597 | -0.96872 | -0.87941 |
| C | -1.62663 | 0.49016  | 0.00002  |
| H | -1.64888 | 1.15646  | -0.87984 |
| H | -1.64894 | 1.15667  | 0.87972  |
| C | -2.86768 | -0.3882  | 0.00008  |
| H | -2.84601 | -1.05486 | 0.87978  |
| H | -2.84589 | -1.05515 | -0.8794  |
| C | -4.16688 | 0.40349  | -0.00015 |
| H | -4.18532 | 1.06806  | -0.87925 |
| H | -4.18544 | 1.06837  | 0.87871  |
| C | -5.3963  | -0.48928 | -0.00008 |
| H | -5.41004 | -1.14054 | 0.88508  |
| H | -6.32687 | 0.09167  | -0.00028 |
| H | -5.40989 | -1.1409  | -0.88496 |

**18**  
**2b**

|   |          |          |          |
|---|----------|----------|----------|
| C | 0.84727  | 0.10764  | 0.21752  |
| C | 2.0518   | 0.17609  | 0.33577  |
| C | -0.57309 | 0.03933  | 0.09839  |
| C | -1.23618 | -1.19595 | 0.13173  |
| C | -1.32451 | 1.21343  | -0.05418 |
| C | -2.61832 | -1.2505  | 0.01418  |
| H | -0.65127 | -2.10631 | 0.25048  |
| C | -2.70618 | 1.15187  | -0.16836 |
| H | -0.8071  | 2.17091  | -0.08064 |
| C | -3.35643 | -0.07918 | -0.1348  |
| H | -3.12402 | -2.21428 | 0.0414   |
| H | -3.27996 | 2.06969  | -0.28476 |
| H | -4.44029 | -0.12657 | -0.2252  |
| C | 3.50803  | 0.27159  | 0.40201  |
| H | 3.79802  | 1.33802  | 0.41914  |
| H | 3.87639  | -0.16312 | 1.341    |
| O | 4.16398  | -0.42736 | -0.63097 |
| H | 3.762    | -0.15532 | -1.4672  |

**19**  
**2c**

|   |          |          |          |
|---|----------|----------|----------|
| C | -0.50129 | -0.05111 | -0.00002 |
| C | -1.71471 | -0.11237 | -0.00007 |
| C | 0.92107  | -0.01229 | -0.00002 |
| C | 1.60306  | 1.21373  | 0.00002  |
| C | 1.65386  | -1.20865 | -0.00003 |
| C | 2.9902   | 1.23809  | 0.00004  |
| H | 1.02893  | 2.13855  | 0.00002  |
| C | 3.04063  | -1.17576 | -0.00003 |
| H | 1.11689  | -2.1553  | -0.00007 |
| C | 3.71028  | 0.04579  | 0.00002  |
| H | 3.5144   | 2.19201  | 0.00008  |
| H | 3.60411  | -2.1069  | -0.00004 |
| H | 4.79856  | 0.06917  | 0.00005  |
| C | -3.16226 | -0.1837  | -0.00006 |
| C | -3.86802 | 1.14559  | -0.00005 |
| H | -3.5767  | 1.73106  | 0.88201  |
| H | -3.57643 | 1.73151  | -0.88169 |
| H | -4.95035 | 0.98679  | -0.00016 |

|           |          |          |          |                        |           |          |          |
|-----------|----------|----------|----------|------------------------|-----------|----------|----------|
| O         | -3.74956 | -1.24785 | 0.00011  | H                      | -1.20731  | -0.85559 | 0.61493  |
| <b>61</b> |          |          |          | C                      | -2.59855  | -0.77176 | -1.05228 |
| <b>2A</b> |          |          |          | H                      | -2.63581  | -0.33091 | -2.06041 |
| C         | 1.44947  | -0.21812 | 1.17554  | H                      | -2.66461  | -1.86191 | -1.19173 |
| C         | 1.41491  | -1.38951 | 1.9252   | C                      | -3.7772   | -0.28335 | -0.2261  |
| C         | 0.81913  | -1.38281 | 3.18317  | H                      | -3.69891  | 0.80798  | -0.08128 |
| C         | 0.27092  | -0.18337 | 3.64586  | H                      | -3.72612  | -0.72558 | 0.78371  |
| C         | 0.31583  | 0.98639  | 2.89819  | C                      | -5.11864  | -0.61726 | -0.85998 |
| C         | 0.92891  | 0.99598  | 1.62735  | H                      | -5.17079  | -0.16803 | -1.86658 |
| H         | 0.76878  | -2.28309 | 3.79412  | H                      | -5.18826  | -1.7076  | -1.01543 |
| H         | -0.2081  | -0.16546 | 4.62328  | C                      | -6.30687  | -0.14907 | -0.03471 |
| H         | -0.14562 | 1.87506  | 3.31327  | H                      | -6.23851  | 0.94156  | 0.12147  |
| C         | 2.4787   | -2.34086 | 0.00078  | H                      | -6.25339  | -0.59919 | 0.97183  |
| O         | 2.92866  | -3.24242 | -0.65637 | C                      | -7.64711  | -0.48666 | -0.66866 |
| N         | 1.97294  | -2.50513 | 1.29199  | H                      | -7.71236  | -1.57679 | -0.8299  |
| C         | 1.98698  | -3.80866 | 1.92424  | H                      | -7.70338  | -0.03331 | -1.67362 |
| H         | 2.56677  | -3.78267 | 2.85671  | C                      | -8.83873  | -0.02829 | 0.1585   |
| H         | 0.96513  | -4.14352 | 2.14959  | H                      | -8.77247  | 1.06049  | 0.31657  |
| H         | 2.45067  | -4.51066 | 1.22785  | H                      | -8.77844  | -0.48136 | 1.1615   |
| C         | 1.03246  | 2.13327  | 0.68073  | C                      | -10.1685  | -0.3778  | -0.48801 |
| C         | 0.72558  | 3.48557  | 0.93708  | H                      | -10.26474 | -1.46341 | -0.62933 |
| C         | 0.88472  | 4.39144  | -0.11446 | H                      | -11.02069 | -0.04511 | 0.11733  |
| C         | 1.64296  | 2.65075  | -1.53362 | H                      | -10.26115 | 0.08933  | -1.47847 |
| C         | 1.33395  | 3.99236  | -1.36249 | C                      | 3.95481   | -0.0349  | 0.00494  |
| H         | 0.65484  | 5.44158  | 0.0685   | O                      | 5.01546   | 0.19622  | 0.369    |
| H         | 2.03982  | 2.2412   | -2.46545 |                        |           |          |          |
| H         | 1.46034  | 4.70173  | -2.17614 | <b>61</b>              |           |          |          |
| C         | 0.27185  | 4.01739  | 2.264    | <b>TS<sub>2A</sub></b> |           |          |          |
| H         | -0.74616 | 3.69229  | 2.51873  | C                      | 1.24208   | -0.23609 | 1.01329  |
| H         | 0.93238  | 3.70398  | 3.08221  | C                      | 1.13171   | -1.40914 | 1.77606  |
| H         | 0.2641   | 5.11345  | 2.24797  | C                      | 0.72699   | -1.31596 | 3.10903  |
| N         | 1.49088  | 1.77307  | -0.54802 | C                      | 0.54888   | -0.0439  | 3.65186  |
| Rh        | 2.23953  | -0.4075  | -0.6288  | C                      | 0.75525   | 1.12908  | 2.9196   |
| Cl        | 3.29282  | -0.15212 | -2.88333 | C                      | 1.11034   | 1.05054  | 1.56842  |
| C         | -0.14542 | -0.92508 | -1.20076 | H                      | 0.60057   | -2.20124 | 3.73007  |
| C         | 0.63018  | -1.43795 | -1.99644 | H                      | 0.2665    | 0.03991  | 4.70025  |
| H         | 1.21008  | -1.92144 | -2.75979 | H                      | 0.66752   | 2.08147  | 3.43287  |
| C         | -1.25794 | -0.42744 | -0.39903 | C                      | 2.08857   | -2.46416 | -0.17387 |
| H         | -1.16695 | 0.6628   | -0.27188 | O                      | 2.40207   | -3.43933 | -0.79924 |

|    |          |          |          |            |           |          |          |
|----|----------|----------|----------|------------|-----------|----------|----------|
| N  | 1.48396  | -2.57086 | 1.11261  | H          | -7.73461  | -1.36357 | -1.19526 |
| C  | 1.22369  | -3.8786  | 1.68378  | H          | -7.69284  | 0.30736  | -1.74385 |
| H  | 1.78369  | -4.01159 | 2.61917  | C          | -9.03504  | -0.04337 | -0.09382 |
| H  | 0.15248  | -4.01344 | 1.88581  | H          | -9.03741  | 1.00244  | 0.25426  |
| H  | 1.5554   | -4.62564 | 0.95937  | H          | -9.06913  | -0.66264 | 0.81741  |
| C  | 1.38309  | 2.16711  | 0.63199  | C          | -10.26494 | -0.30826 | -0.94544 |
| C  | 0.94737  | 3.49865  | 0.77814  | H          | -10.29796 | -1.356   | -1.27522 |
| C  | 1.30141  | 4.39988  | -0.22879 | H          | -11.19433 | -0.10154 | -0.40063 |
| C  | 2.40036  | 2.6644   | -1.42181 | H          | -10.26224 | 0.31807  | -1.84851 |
| C  | 2.03972  | 4.00307  | -1.33212 | C          | 4.10869   | -0.54967 | 0.04902  |
| H  | 0.972    | 5.43555  | -0.13922 | O          | 5.20226   | -0.57096 | 0.38863  |
| H  | 2.94474  | 2.24594  | -2.27189 |            |           |          |          |
| H  | 2.31088  | 4.70525  | -2.11636 | <b>61</b>  |           |          |          |
| C  | 0.10492  | 3.99018  | 1.91754  | <b>2A'</b> |           |          |          |
| H  | -0.70756 | 3.29382  | 2.16192  | C          | 2.44911   | 1.00299  | -0.19815 |
| H  | 0.69178  | 4.14205  | 2.83418  | C          | 2.23265   | 2.37392  | -0.27387 |
| H  | -0.34706 | 4.95658  | 1.66481  | C          | 3.28975   | 3.22031  | -0.59028 |
| N  | 2.07961  | 1.79482  | -0.4718  | C          | 4.54488   | 2.64982  | -0.8144  |
| Rh | 2.31566  | -0.52141 | -0.67405 | C          | 4.76099   | 1.28138  | -0.71859 |
| Cl | 3.33242  | -0.50025 | -2.90587 | C          | 3.69615   | 0.4134   | -0.39274 |
| C  | -0.2033  | -0.37345 | -0.43762 | H          | 3.15544   | 4.29879  | -0.6598  |
| C  | 0.40888  | -0.56664 | -1.52851 | H          | 5.38205   | 3.29807  | -1.06764 |
| H  | 0.28735  | -0.71881 | -2.59149 | H          | 5.76345   | 0.91288  | -0.90067 |
| C  | -1.45369 | -0.18658 | 0.32255  | C          | -0.01227  | 1.80046  | 0.32529  |
| H  | -1.47072 | 0.81806  | 0.77709  | O          | -1.17385  | 2.04049  | 0.56168  |
| H  | -1.50863 | -0.90108 | 1.15841  | N          | 0.91632   | 2.77699  | -0.01721 |
| C  | -2.65986 | -0.36365 | -0.59973 | C          | 0.53678   | 4.17477  | -0.0357  |
| H  | -2.57686 | 0.33053  | -1.4505  | H          | 1.11188   | 4.74093  | 0.70933  |
| H  | -2.64549 | -1.37816 | -1.02734 | H          | 0.70843   | 4.61289  | -1.02848 |
| C  | -3.96694 | -0.12506 | 0.14088  | H          | -0.5261   | 4.23479  | 0.20738  |
| H  | -3.97726 | 0.9019   | 0.5451   | C          | 3.73671   | -1.05852 | -0.22154 |
| H  | -4.01947 | -0.79307 | 1.01786  | C          | 4.87857   | -1.88855 | -0.29657 |
| C  | -5.19571 | -0.33875 | -0.72923 | C          | 4.69891   | -3.25799 | -0.10434 |
| H  | -5.13787 | 0.31392  | -1.61711 | C          | 2.38281   | -2.91996 | 0.22388  |
| H  | -5.19505 | -1.37195 | -1.11644 | C          | 3.4499    | -3.79949 | 0.15367  |
| C  | -6.49782 | -0.07466 | 0.01091  | H          | 5.57245   | -3.90834 | -0.15555 |
| H  | -6.50482 | 0.96619  | 0.37875  | H          | 1.3718    | -3.26921 | 0.43638  |
| H  | -6.54044 | -0.70981 | 0.91291  | H          | 3.3081    | -4.86623 | 0.3063   |
| C  | -7.73612 | -0.31971 | -0.83634 | C          | 6.27156   | -1.39684 | -0.55271 |

|    |           |          |          |    |          |          |          |
|----|-----------|----------|----------|----|----------|----------|----------|
| H  | 6.37551   | -0.93788 | -1.54491 | C  | 2.2408   | 0.87597  | -0.55809 |
| H  | 6.58826   | -0.65404 | 0.19063  | C  | 2.07176  | 2.2593   | -0.65097 |
| H  | 6.98057   | -2.2316  | -0.50513 | C  | 3.13863  | 3.04496  | -1.077   |
| N  | 2.52399   | -1.61103 | 0.04448  | C  | 4.36298  | 2.42129  | -1.31821 |
| Rh | 0.83625   | -0.03334 | 0.31605  | C  | 4.55097  | 1.05366  | -1.12938 |
| Cl | 1.58315   | 0.37594  | 2.54448  | C  | 3.47468  | 0.24331  | -0.7394  |
| C  | 0.69395   | -0.08523 | -1.9176  | H  | 3.04499  | 4.12518  | -1.17352 |
| C  | -0.38908  | -0.62385 | -1.67815 | H  | 5.21217  | 3.03075  | -1.62244 |
| C  | -1.71199  | -1.2445  | -1.64747 | H  | 5.55154  | 0.65024  | -1.24516 |
| H  | -1.90443  | -1.65066 | -2.65428 | C  | -0.0266  | 1.8817   | 0.46137  |
| H  | -1.70094  | -2.11641 | -0.97502 | O  | -1.1023  | 2.22705  | 0.88363  |
| C  | -2.84146  | -0.2886  | -1.25328 | N  | 0.82872  | 2.73819  | -0.23867 |
| H  | -2.95729  | 0.4702   | -2.0427  | C  | 0.4709   | 4.13467  | -0.40181 |
| H  | -2.56655  | 0.27178  | -0.34776 | H  | 1.11509  | 4.77454  | 0.21642  |
| C  | -4.1486   | -1.03272 | -1.0369  | H  | 0.56485  | 4.43512  | -1.45328 |
| H  | -4.40372  | -1.61745 | -1.93855 | H  | -0.56472 | 4.25286  | -0.07737 |
| H  | -4.01326  | -1.77068 | -0.22606 | C  | 3.51169  | -1.19647 | -0.39881 |
| C  | -5.30285  | -0.10764 | -0.68629 | C  | 4.50746  | -2.11342 | -0.79576 |
| H  | -5.43771  | 0.63397  | -1.49245 | C  | 4.39994  | -3.42315 | -0.32789 |
| H  | -5.04101  | 0.47397  | 0.2135   | C  | 2.38509  | -2.86428 | 0.78652  |
| C  | -6.61156  | -0.84581 | -0.45304 | C  | 3.34847  | -3.815   | 0.48474  |
| H  | -6.8749   | -1.42277 | -1.35692 | H  | 5.16069  | -4.14679 | -0.62206 |
| H  | -6.47297  | -1.59296 | 0.34772  | H  | 1.51483  | -3.11086 | 1.39552  |
| C  | -7.76405  | 0.07619  | -0.08844 | H  | 3.26361  | -4.83213 | 0.85868  |
| H  | -7.90099  | 0.82723  | -0.88612 | C  | 5.64615  | -1.77627 | -1.71175 |
| H  | -7.50172  | 0.64981  | 0.81734  | H  | 5.33202  | -1.12659 | -2.53732 |
| C  | -9.07569  | -0.65915 | 0.14192  | H  | 6.46537  | -1.26685 | -1.1854  |
| H  | -9.3365   | -1.22821 | -0.76544 | H  | 6.06602  | -2.6924  | -2.14428 |
| H  | -8.93502  | -1.4105  | 0.93604  | N  | 2.46248  | -1.60999 | 0.35687  |
| C  | -10.21405 | 0.27677  | 0.51129  | Rh | 0.80728  | 0.05414  | 0.63409  |
| H  | -11.15493 | -0.26287 | 0.67561  | Cl | 2.04095  | 0.92023  | 2.55894  |
| H  | -9.98363  | 0.83273  | 1.43084  | C  | 0.79262  | -0.04683 | -1.67072 |
| H  | -10.38876 | 1.01752  | -0.28168 | C  | -0.17644 | -0.6199  | -1.09074 |
| C  | -0.74328  | -0.93686 | 1.24568  | H  | 1.27871  | 0.26008  | -2.58162 |
| O  | -1.60304  | -1.34738 | 1.87636  | C  | -1.46743 | -1.32951 | -1.19195 |
| H  | 1.5237    | 0.32105  | -2.46544 | H  | -1.58992 | -1.72484 | -2.21323 |
|    |           |          |          | H  | -1.46522 | -2.19827 | -0.51435 |
|    |           |          |          | C  | -2.64659 | -0.41813 | -0.84754 |
|    |           |          |          | H  | -2.63586 | 0.45344  | -1.52167 |

**61**  
**TS<sub>2A</sub>'**

|           |           |          |          |           |          |          |          |
|-----------|-----------|----------|----------|-----------|----------|----------|----------|
| H         | -2.51494  | -0.00488 | 0.16393  | H         | 3.23862  | 3.47938  | 0.8925   |
| C         | -3.98002  | -1.14049 | -0.9474  | H         | 4.40137  | 2.35405  | 0.13267  |
| H         | -4.1113   | -1.54397 | -1.96668 | C         | -1.91713 | 0.09274  | -1.05578 |
| H         | -3.97464  | -2.01692 | -0.27595 | C         | -3.30543 | -0.03617 | -1.27334 |
| C         | -5.15883  | -0.24542 | -0.59895 | C         | -3.8243  | -1.32783 | -1.377   |
| H         | -5.16063  | 0.63379  | -1.26608 | C         | -1.67089 | -2.25066 | -1.02342 |
| H         | -5.0233   | 0.15548  | 0.41972  | C         | -3.02084 | -2.45133 | -1.26534 |
| C         | -6.50084  | -0.95405 | -0.6919  | H         | -4.89465 | -1.44272 | -1.55093 |
| H         | -6.6379   | -1.35085 | -1.71309 | H         | -0.95489 | -3.06668 | -0.8982  |
| H         | -6.49695  | -1.83598 | -0.02772 | H         | -3.42772 | -3.4553  | -1.35449 |
| C         | -7.6769   | -0.05905 | -0.33503 | C         | -4.25733 | 1.11602  | -1.3884  |
| H         | -7.67991  | 0.82484  | -0.99674 | H         | -4.25641 | 1.73559  | -0.48054 |
| H         | -7.54026  | 0.3362   | 0.68647  | H         | -4.02347 | 1.7677   | -2.24038 |
| C         | -9.02226  | -0.76285 | -0.42823 | H         | -5.27956 | 0.74697  | -1.53218 |
| H         | -9.15629  | -1.15546 | -1.44949 | N         | -1.15944 | -1.02788 | -0.91987 |
| H         | -9.01623  | -1.645   | 0.23272  | Rh        | 1.02864  | -0.60408 | -0.46234 |
| C         | -10.1845  | 0.14629  | -0.06635 | Cl        | 1.63727  | -3.02326 | -0.35587 |
| H         | -11.14972 | -0.37016 | -0.13798 | C         | 0.20386  | -0.45047 | 1.86173  |
| H         | -10.08393 | 0.52454  | 0.96054  | C         | 1.37786  | -0.81253 | 1.92419  |
| H         | -10.22378 | 1.01981  | -0.73226 | C         | -1.18194 | -0.14332 | 2.05018  |
| C         | -0.50905  | -0.54711 | 1.97185  | C         | -2.10963 | -1.19397 | 2.08786  |
| O         | -1.26301  | -0.84303 | 2.77895  | C         | -1.62217 | 1.17731  | 2.19888  |
|           |           |          |          | C         | -3.45875 | -0.92292 | 2.26017  |
| <b>51</b> |           |          |          | H         | -1.75125 | -2.216   | 1.96825  |
| <b>2B</b> |           |          |          | C         | -2.97467 | 1.43978  | 2.37859  |
| C         | 0.21907   | 1.18693  | -0.64532 | H         | -0.89593 | 1.98811  | 2.15836  |
| C         | 1.08961   | 2.25305  | -0.45345 | C         | -3.8941  | 0.39356  | 2.4043   |
| C         | 0.61011   | 3.55698  | -0.52495 | H         | -4.17558 | -1.742   | 2.28192  |
| C         | -0.74534  | 3.74269  | -0.80794 | H         | -3.31219 | 2.46866  | 2.49352  |
| C         | -1.61213  | 2.67498  | -1.00406 | H         | -4.95373 | 0.60386  | 2.54217  |
| C         | -1.14076  | 1.34827  | -0.91916 | C         | 1.50697  | -0.71281 | -2.26659 |
| H         | 1.26342   | 4.41452  | -0.37207 | O         | 1.8016   | -0.8114  | -3.36807 |
| H         | -1.13551  | 4.75656  | -0.87733 | C         | 2.70751  | -1.27064 | 2.38942  |
| H         | -2.65099  | 2.89695  | -1.21761 | H         | 2.52242  | -1.85287 | 3.30408  |
| C         | 2.71945   | 0.52955  | -0.19025 | H         | 3.12471  | -1.95936 | 1.6399   |
| O         | 3.84781   | 0.1147   | -0.01722 | O         | 3.57097  | -0.22143 | 2.71787  |
| N         | 2.41791   | 1.88342  | -0.20475 | H         | 4.02944  | 0.01148  | 1.89213  |
| C         | 3.45278   | 2.87811  | -0.00076 |           |          |          |          |
| H         | 3.52644   | 3.54225  | -0.87219 | <b>51</b> |          |          |          |

**TS<sub>2B</sub>**

|    |          |          |          |
|----|----------|----------|----------|
| C  | -0.1015  | 0.66024  | -0.81679 |
| C  | 0.18359  | 2.00249  | -1.11842 |
| C  | -0.73476 | 2.73426  | -1.87863 |
| C  | -1.84496 | 2.06437  | -2.385   |
| C  | -2.0815  | 0.70128  | -2.16251 |
| C  | -1.20152 | -0.03265 | -1.36694 |
| H  | -0.56899 | 3.7839   | -2.11605 |
| H  | -2.54881 | 2.61829  | -3.00442 |
| H  | -2.93821 | 0.24214  | -2.64483 |
| C  | 2.31483  | 1.51035  | -0.10749 |
| O  | 3.40093  | 1.84313  | 0.27853  |
| N  | 1.39901  | 2.46003  | -0.65638 |
| C  | 1.73702  | 3.87013  | -0.67103 |
| H  | 1.81397  | 4.24418  | -1.70081 |
| H  | 0.98147  | 4.45626  | -0.13001 |
| H  | 2.70548  | 3.98091  | -0.17845 |
| C  | -1.29247 | -1.45675 | -0.97179 |
| C  | -2.45409 | -2.25465 | -1.00737 |
| C  | -2.34909 | -3.55615 | -0.51045 |
| C  | -0.06041 | -3.1923  | 0.01574  |
| C  | -1.15761 | -4.04432 | 0.00201  |
| H  | -3.23696 | -4.18907 | -0.5183  |
| H  | 0.91268  | -3.47959 | 0.42112  |
| H  | -1.08007 | -5.05429 | 0.39661  |
| C  | -3.78974 | -1.77631 | -1.49158 |
| H  | -4.05124 | -0.79823 | -1.0652  |
| H  | -3.82764 | -1.68241 | -2.58561 |
| H  | -4.57305 | -2.48764 | -1.20411 |
| N  | -0.13773 | -1.95385 | -0.45648 |
| Rh | 1.50756  | -0.33665 | -0.15752 |
| Cl | 3.17255  | -1.8204  | 0.93664  |
| C  | -0.47395 | 0.65706  | 1.21324  |
| C  | 0.61768  | 0.17646  | 1.66877  |
| C  | -1.88075 | 0.94107  | 1.3517   |
| C  | -2.73147 | -0.09987 | 1.75654  |
| C  | -2.41527 | 2.21083  | 1.10106  |
| C  | -4.0935  | 0.12946  | 1.90147  |
| H  | -2.30238 | -1.08429 | 1.94635  |

|   |          |          |          |
|---|----------|----------|----------|
| C | -3.7782  | 2.43149  | 1.24066  |
| H | -1.74869 | 3.01397  | 0.7894   |
| C | -4.61849 | 1.39207  | 1.63514  |
| H | -4.74825 | -0.67973 | 2.22069  |
| H | -4.18994 | 3.42014  | 1.04658  |
| H | -5.68727 | 1.56941  | 1.74259  |
| C | 2.38102  | -0.70515 | -1.85803 |
| O | 2.95598  | -0.94047 | -2.81981 |
| C | 1.23919  | -0.11387 | 3.00852  |
| H | 0.63153  | 0.35449  | 3.79579  |
| H | 1.18295  | -1.21081 | 3.14055  |
| O | 2.53008  | 0.37148  | 3.13838  |
| H | 3.09085  | -0.15546 | 2.53362  |

**51  
2B'**

|   |          |          |          |
|---|----------|----------|----------|
| C | 1.4288   | 0.97179  | -0.21056 |
| C | 1.28249  | 2.33329  | -0.44802 |
| C | 2.30687  | 3.03895  | -1.06943 |
| C | 3.46433  | 2.34079  | -1.42303 |
| C | 3.62658  | 0.9914   | -1.13743 |
| C | 2.60038  | 0.27141  | -0.49017 |
| H | 2.21945  | 4.10365  | -1.28093 |
| H | 4.26925  | 2.87283  | -1.92721 |
| H | 4.55312  | 0.51799  | -1.43876 |
| C | -0.83671 | 2.03013  | 0.61338  |
| O | -1.89939 | 2.40603  | 1.05448  |
| N | 0.06117  | 2.87351  | -0.02742 |
| C | -0.21425 | 4.29182  | -0.14019 |
| H | 0.53973  | 4.87425  | 0.40624  |
| H | -0.21478 | 4.60573  | -1.19279 |
| H | -1.19851 | 4.47678  | 0.29491  |
| C | 2.60684  | -1.15344 | -0.08135 |
| C | 3.71739  | -2.02651 | -0.08635 |
| C | 3.51319  | -3.33538 | 0.35029  |
| C | 1.23784  | -2.85188 | 0.77613  |
| C | 2.27199  | -3.77373 | 0.78138  |
| H | 4.36249  | -4.01893 | 0.35649  |
| H | 0.23725  | -3.11776 | 1.11725  |





|   |          |          |          |
|---|----------|----------|----------|
| H | 1.19833  | -1.315   | -2.49654 |
| H | 0.75882  | 0.29817  | -3.07827 |
| O | -0.55321 | -1.28047 | -3.48686 |
| H | -1.31118 | -0.69416 | -3.62712 |

**52  
2C**

|    |          |          |          |
|----|----------|----------|----------|
| C  | 0.20934  | 1.33903  | -0.50956 |
| C  | 1.1497   | 2.30577  | -0.16719 |
| C  | 0.72983  | 3.60083  | 0.12018  |
| C  | -0.63717 | 3.88082  | 0.04913  |
| C  | -1.57226 | 2.91539  | -0.30124 |
| C  | -1.16039 | 1.5986   | -0.59856 |
| H  | 1.43839  | 4.37934  | 0.39858  |
| H  | -0.98067 | 4.88808  | 0.27838  |
| H  | -2.61753 | 3.20077  | -0.31584 |
| C  | 2.70745  | 0.52069  | -0.44928 |
| O  | 3.80419  | 0.03169  | -0.54168 |
| N  | 2.47203  | 1.85298  | -0.13744 |
| C  | 3.57133  | 2.72749  | 0.22229  |
| H  | 3.6688   | 3.55105  | -0.49784 |
| H  | 3.41374  | 3.13636  | 1.22849  |
| H  | 4.4859   | 2.13121  | 0.21944  |
| C  | -2.01473 | 0.44115  | -0.95637 |
| C  | -3.39509 | 0.45853  | -1.2491  |
| C  | -3.99567 | -0.75271 | -1.59705 |
| C  | -1.92411 | -1.87774 | -1.35648 |
| C  | -3.27558 | -1.93474 | -1.66011 |
| H  | -5.06004 | -0.75324 | -1.8338  |
| H  | -1.2679  | -2.75201 | -1.37323 |
| H  | -3.74423 | -2.87467 | -1.94029 |
| C  | -4.2528  | 1.68751  | -1.22332 |
| H  | -4.35645 | 2.09335  | -0.20729 |
| H  | -3.85394 | 2.48682  | -1.86084 |
| H  | -5.2614  | 1.45246  | -1.58272 |
| N  | -1.33682 | -0.73471 | -1.01562 |
| Rh | 0.92508  | -0.49428 | -0.66635 |
| Cl | 1.33964  | -2.94847 | -0.77986 |
| C  | 0.16768  | -0.65063 | 1.76518  |

|   |          |          |          |
|---|----------|----------|----------|
| C | 1.38812  | -0.71473 | 1.59788  |
| C | -1.22373 | -0.57696 | 2.03722  |
| C | -2.0197  | -1.72747 | 1.9303   |
| C | -1.7991  | 0.648    | 2.40833  |
| C | -3.37718 | -1.6501  | 2.20105  |
| H | -1.55067 | -2.6614  | 1.62122  |
| C | -3.15971 | 0.71386  | 2.67578  |
| H | -1.16757 | 1.53389  | 2.46751  |
| C | -3.94619 | -0.43144 | 2.57077  |
| H | -3.99816 | -2.54    | 2.11899  |
| H | -3.609   | 1.66182  | 2.9669   |
| H | -5.01276 | -0.37596 | 2.78289  |
| C | 1.24506  | -0.41437 | -2.50708 |
| O | 1.44951  | -0.39928 | -3.63336 |
| C | 2.7892   | -0.81035 | 2.08366  |
| C | 3.45811  | -2.12811 | 1.89291  |
| H | 2.84088  | -2.93792 | 2.30227  |
| H | 3.54687  | -2.32761 | 0.81565  |
| H | 4.44384  | -2.10874 | 2.36632  |
| O | 3.28612  | 0.16073  | 2.61055  |

**52  
TS<sub>2C</sub>**

|   |          |          |          |
|---|----------|----------|----------|
| C | 0.13244  | -0.67462 | -0.90127 |
| C | -0.04906 | -2.04429 | -1.16387 |
| C | 0.9403   | -2.73484 | -1.87118 |
| C | 2.0223   | -2.0069  | -2.35677 |
| C | 2.16195  | -0.625   | -2.16935 |
| C | 1.20331  | 0.07567  | -1.43652 |
| H | 0.85463  | -3.80055 | -2.07727 |
| H | 2.7868   | -2.53021 | -2.92923 |
| H | 3.01135  | -0.12959 | -2.62675 |
| C | -2.21691 | -1.67909 | -0.17808 |
| O | -3.27274 | -2.07887 | 0.2229   |
| N | -1.23384 | -2.57375 | -0.70418 |
| C | -1.46998 | -4.00474 | -0.67788 |
| H | -1.51671 | -4.41206 | -1.69668 |
| H | -0.67638 | -4.51951 | -0.11903 |
| H | -2.42939 | -4.16923 | -0.18268 |

|    |          |          |          |    |          |          |          |
|----|----------|----------|----------|----|----------|----------|----------|
| C  | 1.18581  | 1.51547  | -1.08721 | C  | 1.46222  | 1.06082  | 0.1844   |
| C  | 2.27876  | 2.40439  | -1.15624 | C  | 1.30573  | 2.43622  | 0.04404  |
| C  | 2.06776  | 3.71076  | -0.70802 | C  | 2.38585  | 3.21527  | -0.36051 |
| C  | -0.18513 | 3.18572  | -0.16875 | C  | 3.59922  | 2.57065  | -0.61314 |
| C  | 0.84019  | 4.12207  | -0.21408 | C  | 3.74719  | 1.195    | -0.48446 |
| H  | 2.90087  | 4.41324  | -0.74407 | C  | 2.66022  | 0.3938   | -0.07688 |
| H  | -1.18352 | 3.40712  | 0.21747  | H  | 2.29982  | 4.29434  | -0.47979 |
| H  | 0.68129  | 5.13777  | 0.13916  | H  | 4.45729  | 3.16465  | -0.92299 |
| C  | 3.64732  | 2.02592  | -1.63637 | H  | 4.71989  | 0.76775  | -0.69604 |
| H  | 4.01789  | 1.11766  | -1.14168 | C  | -0.96741 | 1.95677  | 0.62105  |
| H  | 3.67365  | 1.84794  | -2.72005 | O  | -2.1368  | 2.23683  | 0.72603  |
| H  | 4.35865  | 2.83358  | -1.42758 | N  | 0.00855  | 2.90103  | 0.28975  |
| N  | -0.00497 | 1.93999  | -0.59005 | C  | -0.34859 | 4.28842  | 0.07895  |
| Rh | -1.54262 | 0.22134  | -0.26361 | H  | 0.2345   | 4.94368  | 0.73955  |
| Cl | -3.31239 | 1.64087  | 0.71218  | H  | -0.16674 | 4.58446  | -0.96446 |
| C  | 0.53454  | -0.6455  | 1.13436  | H  | -1.41127 | 4.3975   | 0.30591  |
| C  | -0.59056 | -0.22545 | 1.56699  | C  | 2.61469  | -1.08065 | 0.0753   |
| C  | 1.94571  | -0.88083 | 1.28357  | C  | 3.62908  | -2.00042 | -0.25744 |
| C  | 2.76893  | 0.2023   | 1.63155  | C  | 3.35396  | -3.35567 | -0.07459 |
| C  | 2.51215  | -2.14662 | 1.09089  | C  | 1.17845  | -2.83317 | 0.70575  |
| C  | 4.13706  | 0.01782  | 1.77627  | C  | 2.13268  | -3.79358 | 0.40977  |
| H  | 2.31186  | 1.18152  | 1.78233  | H  | 4.12635  | -4.0805  | -0.33303 |
| C  | 3.88155  | -2.323   | 1.23351  | H  | 0.18302  | -3.07543 | 1.08448  |
| H  | 1.86534  | -2.98195 | 0.82641  | H  | 1.91895  | -4.85048 | 0.54633  |
| C  | 4.69432  | -1.24261 | 1.56867  | C  | 4.95856  | -1.62193 | -0.83636 |
| H  | 4.77116  | 0.85828  | 2.05322  | H  | 4.84312  | -1.05423 | -1.76926 |
| H  | 4.319    | -3.30868 | 1.08664  | H  | 5.56189  | -1.01622 | -0.14738 |
| H  | 5.76807  | -1.38531 | 1.67765  | H  | 5.53864  | -2.52215 | -1.0701  |
| C  | -2.42416 | 0.48439  | -1.95551 | N  | 1.42509  | -1.5375  | 0.54446  |
| O  | -3.00374 | 0.66122  | -2.92711 | Rh | -0.1464  | 0.08926  | 0.80223  |
| C  | -1.19354 | -0.04173 | 2.9181   | Cl | -1.81678 | -1.47726 | 1.81234  |
| C  | -1.17316 | 1.37156  | 3.41578  | C  | -0.56365 | -0.25337 | -1.41933 |
| H  | -0.20149 | 1.84556  | 3.21803  | C  | -1.78667 | -0.37127 | -1.24145 |
| H  | -1.93997 | 1.92853  | 2.85401  | C  | -3.17318 | -0.54264 | -1.0571  |
| H  | -1.40449 | 1.39084  | 4.48514  | C  | -3.68753 | -1.8395  | -0.87719 |
| O  | -1.65848 | -0.981   | 3.51778  | C  | -4.0372  | 0.5659   | -1.06791 |
|    |          |          |          | C  | -5.05267 | -2.02198 | -0.73602 |
|    |          |          |          | H  | -2.99758 | -2.67897 | -0.84204 |
|    |          |          |          | C  | -5.39993 | 0.37008  | -0.91655 |

**52**  
**2C'**

|   |          |          |          |    |          |          |          |
|---|----------|----------|----------|----|----------|----------|----------|
| H | -3.61666 | 1.56366  | -1.16289 | H  | -3.3465  | 2.93408  | -2.24122 |
| C | -5.90481 | -0.9193  | -0.75543 | C  | 0.26042  | 4.72251  | 0.09877  |
| H | -5.45626 | -3.02224 | -0.59529 | H  | 0.74186  | 4.4015   | 1.03085  |
| H | -6.07313 | 1.22458  | -0.91446 | H  | 1.03497  | 5.19494  | -0.52155 |
| H | -6.97715 | -1.06571 | -0.63498 | H  | -0.47087 | 5.50204  | 0.34386  |
| C | 0.2232   | 0.48722  | 2.59275  | N  | -0.5863  | 1.29015  | -1.28526 |
| O | 0.45657  | 0.71747  | 3.68992  | Rh | 0.29371  | -0.84523 | -0.78014 |
| C | 0.54855  | -0.2512  | -2.39329 | Cl | -1.40808 | -2.08929 | -2.08289 |
| C | 0.69675  | 1.02311  | -3.17474 | C  | 0.10725  | -0.11609 | 1.36792  |
| H | 1.51802  | 0.92037  | -3.89049 | C  | -1.00558 | -0.51687 | 0.88617  |
| H | -0.23771 | 1.25386  | -3.70286 | C  | -2.42438 | -0.68322 | 0.99707  |
| H | 0.90069  | 1.85997  | -2.49169 | C  | -3.19317 | 0.41685  | 1.41478  |
| O | 1.25822  | -1.22034 | -2.54417 | C  | -3.05296 | -1.90345 | 0.70969  |

## 52 TS<sub>2C'</sub>

|   |          |          |          |   |          |          |          |
|---|----------|----------|----------|---|----------|----------|----------|
| C | 1.56433  | 0.46505  | 0.07089  | H | -2.69643 | 1.36484  | 1.62566  |
| C | 2.77211  | -0.13442 | 0.43935  | C | -4.42718 | -2.01828 | 0.86729  |
| C | 3.87721  | 0.67222  | 0.695    | H | -2.45411 | -2.74026 | 0.35874  |
| C | 3.74794  | 2.04938  | 0.52182  | C | -5.18665 | -0.92525 | 1.27694  |
| C | 2.56124  | 2.63769  | 0.08453  | H | -5.16058 | 1.15109  | 1.86262  |
| C | 1.43297  | 1.84526  | -0.16359 | H | -4.91126 | -2.96903 | 0.65301  |
| H | 4.82888  | 0.2457   | 1.00612  | H | -6.26564 | -1.02271 | 1.38418  |
| H | 4.61217  | 2.68465  | 0.707    | C | 1.27582  | -1.11264 | -2.42746 |
| H | 2.54935  | 3.70672  | -0.1055  | O | 1.79501  | -1.26612 | -3.43373 |
| C | 1.58832  | -2.18554 | 0.0455   | C | 0.71392  | 0.00266  | 2.71505  |
| O | 1.40113  | -3.3659  | 0.15836  | C | -0.29534 | 0.474    | 3.73277  |
| N | 2.75059  | -1.52931 | 0.4668   | H | -0.51424 | 1.53698  | 3.56129  |
| C | 3.7825   | -2.27095 | 1.17204  | H | -1.24325 | -0.07086 | 3.63971  |
| H | 4.75044  | -2.15663 | 0.66778  | H | 0.12252  | 0.3502   | 4.73597  |
| H | 3.85891  | -1.91111 | 2.20602  | O | 1.86424  | -0.24136 | 2.99921  |
| H | 3.50003  | -3.32565 | 1.1674   |   |          |          |          |
| C | 0.12868  | 2.28513  | -0.7005  |   |          |          |          |
| C | -0.41245 | 3.58304  | -0.60719 |   |          |          |          |
| C | -1.66924 | 3.79401  | -1.1777  |   |          |          |          |
| C | -1.78667 | 1.50854  | -1.81205 |   |          |          |          |
| C | -2.36751 | 2.76924  | -1.79835 |   |          |          |          |
| H | -2.10821 | 4.79041  | -1.11423 |   |          |          |          |
| H | -2.27616 | 0.63035  | -2.24039 |   |          |          |          |

## 19 NoDG1

|   |          |          |          |
|---|----------|----------|----------|
| C | -0.53314 | -0.7738  | 0.00021  |
| C | -0.36686 | 0.62053  | 0.00005  |
| C | -1.46196 | 1.46816  | -0.00019 |
| C | -2.72974 | 0.87905  | -0.00014 |
| C | -2.90623 | -0.50489 | 0.00003  |
| C | -1.79519 | -1.34552 | 0.0001   |
| H | -1.34903 | 2.55058  | -0.00042 |

|   |          |          |          |    |          |          |          |
|---|----------|----------|----------|----|----------|----------|----------|
| H | -3.60628 | 1.52521  | -0.00026 | Cl | -0.66049 | 0.51279  | 2.54544  |
| H | -3.91049 | -0.92236 | 0.00012  | H  | -2.3805  | 2.09879  | 1.04894  |
| C | 0.79943  | -1.37847 | 0.       | H  | -3.5078  | 0.1516   | 1.80947  |
| C | 1.78664  | -0.17322 | -0.00015 | H  | -0.69215 | -0.33727 | -2.18781 |
| O | 1.13669  | -2.53726 | 0.00001  | H  | -1.51489 | -2.33678 | -1.16666 |
| O | 2.99216  | -0.20762 | -0.00018 | H  | -1.87753 | 2.64246  | -1.2123  |
| N | 0.98993  | 0.96101  | -0.00012 | H  | 0.44288  | 1.78386  | 0.07973  |
| C | 1.51068  | 2.30372  | 0.00029  | H  | 5.40623  | 1.42492  | -0.5569  |
| H | 1.188    | 2.85325  | -0.89409 | C  | 1.63453  | -0.86538 | 0.05824  |
| H | 1.18632  | 2.85317  | 0.8941   | O  | 0.5028   | -1.31119 | 0.19923  |
| H | 2.60226  | 2.22888  | 0.00127  | C  | 2.8614   | -1.8018  | -0.03927 |
| H | -1.89295 | -2.43013 | 0.0002   | O  | 2.86865  | -3.00571 | 0.01949  |

**41**  
**NoDGA**

|    |          |          |          |
|----|----------|----------|----------|
| C  | 3.54123  | 0.37102  | -0.2538  |
| C  | 4.32838  | 1.49523  | -0.42701 |
| C  | 3.68439  | 2.73633  | -0.42456 |
| C  | 2.30475  | 2.85858  | -0.25549 |
| C  | 1.52077  | 1.7232   | -0.08099 |
| C  | 2.14524  | 0.47993  | -0.08404 |
| H  | 4.28427  | 3.63551  | -0.55613 |
| H  | 1.84587  | 3.84424  | -0.24983 |
| C  | -2.70346 | 1.39221  | 0.28002  |
| C  | -3.38756 | 0.24856  | 0.72794  |
| C  | -1.68541 | -0.28466 | -1.72995 |
| C  | -4.32555 | -0.57505 | -0.13297 |
| C  | -2.16684 | -1.45894 | -1.12936 |
| C  | -3.60725 | -1.75668 | -0.79498 |
| H  | -5.14822 | -0.95225 | 0.48829  |
| H  | -4.79541 | 0.0712   | -0.88722 |
| H  | -3.60885 | -2.60787 | -0.10015 |
| H  | -4.15581 | -2.09403 | -1.69151 |
| C  | -2.71866 | 1.93836  | -1.12624 |
| H  | -3.62975 | 2.53776  | -1.29769 |
| C  | -2.56875 | 0.85441  | -2.20034 |
| H  | -3.5506  | 0.46236  | -2.50022 |
| H  | -2.14004 | 1.29884  | -3.10846 |
| Rh | -1.33908 | -0.21952 | 0.39075  |

|   |          |          |          |
|---|----------|----------|----------|
| H | -2.3805  | 2.09879  | 1.04894  |
| H | -3.5078  | 0.1516   | 1.80947  |
| H | -0.69215 | -0.33727 | -2.18781 |
| H | -1.51489 | -2.33678 | -1.16666 |
| H | -1.87753 | 2.64246  | -1.2123  |
| H | 0.44288  | 1.78386  | 0.07973  |
| H | 5.40623  | 1.42492  | -0.5569  |
| C | 1.63453  | -0.86538 | 0.05824  |
| O | 0.5028   | -1.31119 | 0.19923  |
| C | 2.8614   | -1.8018  | -0.03927 |
| O | 2.86865  | -3.00571 | 0.01949  |
| N | 3.94696  | -0.96585 | -0.22109 |
| C | 5.30368  | -1.43308 | -0.35498 |
| H | 5.72442  | -1.14405 | -1.32692 |
| H | 5.93756  | -1.03121 | 0.44593  |
| H | 5.28163  | -2.52432 | -0.28227 |

**41**  
**NoDGA1**

|   |          |          |          |
|---|----------|----------|----------|
| C | -3.12293 | 0.85535  | 0.36433  |
| C | -3.5294  | -0.47861 | 0.23321  |
| C | -4.80671 | -0.80383 | -0.17933 |
| C | -5.67768 | 0.25655  | -0.45399 |
| C | -5.28718 | 1.58781  | -0.3201  |
| C | -3.99262 | 1.89757  | 0.0942   |
| H | -5.12983 | -1.83669 | -0.29176 |
| H | -6.69091 | 0.02938  | -0.78123 |
| H | -5.99494 | 2.38257  | -0.54433 |
| C | -1.72417 | 0.84922  | 0.79638  |
| C | -1.34757 | -0.65562 | 0.84364  |
| O | -0.9909  | 1.74959  | 1.12814  |
| O | -0.25225 | -1.13515 | 1.13611  |
| N | -2.47807 | -1.35537 | 0.57405  |
| C | -2.48732 | -2.7752  | 0.3091   |
| H | -3.28494 | -3.26944 | 0.87618  |
| H | -2.62715 | -2.95516 | -0.76511 |
| H | -1.51901 | -3.17826 | 0.61638  |
| C | 2.84812  | -0.93692 | 1.17903  |

|    |          |          |          |    |          |          |          |
|----|----------|----------|----------|----|----------|----------|----------|
| C  | 2.52949  | 0.38693  | 1.52618  | C  | -2.7427  | -2.67869 | -0.12809 |
| C  | 2.98324  | 0.01234  | -1.4428  | H  | -3.76308 | -2.76156 | 0.26492  |
| C  | 3.39444  | 1.58524  | 1.19507  | H  | -2.7606  | -2.6758  | -1.22706 |
| C  | 2.41815  | 1.26587  | -1.12321 | H  | -2.1516  | -3.52792 | 0.22268  |
| C  | 2.93526  | 2.25187  | -0.10625 | C  | 2.15458  | -0.43985 | 1.38602  |
| H  | 3.34027  | 2.31347  | 2.01491  | C  | 2.04366  | 0.94881  | 1.28823  |
| H  | 4.44839  | 1.28143  | 1.13375  | C  | 2.50238  | -0.33336 | -1.43123 |
| H  | 2.10526  | 2.93553  | 0.12342  | C  | 3.02158  | 1.88203  | 0.60589  |
| H  | 3.73815  | 2.87398  | -0.5391  | C  | 2.06443  | 0.97853  | -1.55723 |
| C  | 4.05319  | -1.37355 | 0.38136  | C  | 2.62904  | 2.17383  | -0.84321 |
| H  | 4.95766  | -1.40012 | 1.01376  | H  | 3.05138  | 2.82668  | 1.16471  |
| C  | 4.28643  | -0.5106  | -0.86549 | H  | 4.03922  | 1.47513  | 0.66578  |
| H  | 4.95566  | 0.33169  | -0.63977 | H  | 1.85647  | 2.95565  | -0.85204 |
| H  | 4.8071   | -1.10558 | -1.62726 | H  | 3.48218  | 2.5861   | -1.40913 |
| Rh | 1.34499  | -0.23968 | -0.13384 | C  | 3.21966  | -1.30631 | 0.77163  |
| Cl | -0.35047 | -0.24168 | -1.84639 | H  | 4.08478  | -1.39221 | 1.45106  |
| H  | 2.36852  | -1.72942 | 1.76264  | C  | 3.66859  | -0.82806 | -0.61344 |
| H  | 1.79753  | 0.53004  | 2.32608  | H  | 4.43686  | -0.04885 | -0.5354  |
| H  | 2.66926  | -0.42744 | -2.39306 | H  | 4.14058  | -1.664   | -1.14631 |
| H  | 1.72626  | 1.68799  | -1.85702 | Rh | 0.67948  | -0.06414 | -0.16245 |
| H  | 3.87297  | -2.41042 | 0.06444  | Cl | -0.57985 | -0.57909 | -2.15322 |
| H  | -3.65179 | 2.92622  | 0.19803  | H  | 1.57846  | -0.91689 | 2.18179  |

## 41

### NoDGTS<sub>A1-B</sub>

|   |          |          |          |
|---|----------|----------|----------|
| C | -1.97677 | 0.83495  | 0.77512  |
| C | -2.67499 | -0.20517 | 0.14909  |
| C | -3.83799 | 0.06205  | -0.55576 |
| C | -4.27083 | 1.38491  | -0.63854 |
| C | -3.57498 | 2.42428  | -0.02293 |
| C | -2.41832 | 2.14831  | 0.69959  |
| H | -4.39084 | -0.73363 | -1.04966 |
| H | -5.17664 | 1.60745  | -1.19989 |
| H | -3.94253 | 3.44522  | -0.09789 |
| C | -0.79557 | 0.33046  | 1.47674  |
| C | -0.80975 | -1.48972 | 0.79236  |
| O | -0.46631 | 0.48925  | 2.62167  |
| O | -0.21349 | -2.44951 | 1.21145  |
| N | -2.11653 | -1.46795 | 0.36084  |

## 41

### NoDGB

|   |         |          |          |
|---|---------|----------|----------|
| C | 2.02179 | 0.96879  | 0.05613  |
| C | 2.6333  | -0.2634  | -0.27719 |
| C | 4.00543 | -0.23975 | -0.58379 |
| C | 4.74115 | 0.93331  | -0.56412 |
| C | 4.14146 | 2.14389  | -0.23256 |
| C | 2.79555 | 2.14145  | 0.07358  |
| H | 4.5162  | -1.15898 | -0.84852 |
| H | 5.80034 | 0.89293  | -0.81303 |
| H | 4.71488 | 3.06765  | -0.20983 |

|                                    |          |          |          |           |          |          |          |
|------------------------------------|----------|----------|----------|-----------|----------|----------|----------|
| C                                  | 0.60727  | 1.18436  | 0.41064  | C         | -3.08848 | -2.37884 | 0.73289  |
| C                                  | 0.60956  | -1.66112 | -0.18736 | C         | -1.85888 | -2.04957 | 0.16876  |
| O                                  | 0.17529  | 2.23995  | 0.79602  | H         | -4.42161 | 0.73138  | 1.00944  |
| O                                  | 0.07177  | -2.74853 | -0.30479 | H         | -4.95684 | -1.63243 | 1.50925  |
| N                                  | 1.97274  | -1.49604 | -0.31713 | H         | -3.33618 | -3.4244  | 0.90723  |
| C                                  | 2.75121  | -2.71595 | -0.52426 | C         | -0.59457 | 0.41708  | -1.47133 |
| H                                  | 3.20377  | -2.7354  | -1.52376 | C         | -1.15202 | 1.76549  | -1.01211 |
| H                                  | 3.53629  | -2.7989  | 0.23588  | O         | -0.47861 | 0.10596  | -2.61419 |
| H                                  | 2.06474  | -3.55711 | -0.42883 | O         | -0.68448 | 2.81599  | -1.40216 |
| C                                  | -1.52346 | -0.588   | -1.75599 | N         | -2.15196 | 1.60378  | -0.10571 |
| C                                  | -1.20367 | 0.75947  | -1.68342 | C         | -2.83773 | 2.75476  | 0.43985  |
| C                                  | -3.12868 | -0.0315  | 0.71221  | H         | -3.85365 | 2.85012  | 0.03533  |
| C                                  | -2.19074 | 1.90599  | -1.54431 | H         | -2.89279 | 2.67519  | 1.53292  |
| C                                  | -2.64032 | 1.21961  | 0.89969  | H         | -2.26347 | 3.64314  | 0.16037  |
| C                                  | -2.65019 | 2.31539  | -0.12825 | Rh        | 0.65586  | -0.50647 | -0.09513 |
| H                                  | -1.74266 | 2.78829  | -2.01949 | Cl        | 0.92348  | -2.47548 | -1.41797 |
| H                                  | -3.06528 | 1.65705  | -2.16297 | H         | -1.16222 | -2.83854 | -0.10495 |
| H                                  | -2.00509 | 3.11929  | 0.23647  | C         | 0.79001  | 0.32506  | 1.9178   |
| H                                  | -3.66387 | 2.74273  | -0.2027  | C         | 0.79863  | 1.43759  | 1.08135  |
| C                                  | -2.85376 | -1.24482 | -1.5031  | C         | 2.91233  | -0.65181 | 0.21352  |
| H                                  | -3.35677 | -1.42827 | -2.46825 | C         | 1.98832  | 2.2576   | 0.62427  |
| C                                  | -3.80312 | -0.50661 | -0.54837 | C         | 2.67079  | 0.25536  | -0.79949 |
| H                                  | -4.28034 | 0.34056  | -1.05821 | C         | 2.6051   | 1.75096  | -0.68384 |
| H                                  | -4.61716 | -1.19334 | -0.28061 | H         | 1.64428  | 3.2865   | 0.46072  |
| Rh                                 | -0.7177  | -0.29406 | 0.28016  | H         | 2.73803  | 2.31342  | 1.42422  |
| Cl                                 | -0.21842 | -0.77969 | 2.53868  | H         | 1.99286  | 2.12158  | -1.51874 |
| H                                  | -0.80347 | -1.24262 | -2.25051 | H         | 3.60999  | 2.18191  | -0.8308  |
| H                                  | -0.23394 | 1.03232  | -2.10701 | C         | 1.97979  | -0.36783 | 2.52588  |
| H                                  | -3.11028 | -0.72019 | 1.56114  | H         | 2.1799   | 0.06583  | 3.52099  |
| H                                  | -2.26119 | 1.47731  | 1.88945  | C         | 3.23628  | -0.33104 | 1.65206  |
| H                                  | -2.63334 | -2.2426  | -1.09066 | H         | 3.74344  | 0.63746  | 1.73384  |
| H                                  | 2.2845   | 3.06076  | 0.34958  | H         | 3.94965  | -1.07639 | 2.02701  |
|                                    |          |          |          | H         | -0.16433 | 0.09063  | 2.39826  |
|                                    |          |          |          | H         | -0.15252 | 1.96158  | 1.0299   |
|                                    |          |          |          | H         | 3.06981  | -1.68637 | -0.09647 |
|                                    |          |          |          | H         | 2.67507  | -0.14204 | -1.81787 |
|                                    |          |          |          | H         | 1.70239  | -1.41735 | 2.7095   |
| <b>41</b><br>NoDGTS <sub>A-C</sub> |          |          |          |           |          |          |          |
| C                                  | -1.47904 | -0.71154 | -0.0127  |           |          |          |          |
| C                                  | -2.44808 | 0.27505  | 0.26611  |           |          |          |          |
| C                                  | -3.68721 | -0.04788 | 0.81328  |           |          |          |          |
| C                                  | -3.99293 | -1.37863 | 1.07153  | <b>41</b> |          |          |          |

|       |          |          |          |                               |          |          |          |
|-------|----------|----------|----------|-------------------------------|----------|----------|----------|
| NoDGC |          |          | H        | -2.91971                      | -1.83388 | 0.6026   |          |
| C     | 1.45023  | -0.76514 | -0.10096 | H                             | -2.75257 | 0.16479  | 1.81194  |
| C     | 2.42798  | 0.23764  | -0.16175 | H                             | -1.45468 | -2.18453 | -2.08677 |
| C     | 3.76476  | -0.09337 | -0.41328 |                               |          |          |          |
| C     | 4.13446  | -1.41081 | -0.63974 | <b>64</b>                     |          |          |          |
| C     | 3.17242  | -2.41294 | -0.60108 | <b>MeTS<sub>A1-B(1)</sub></b> |          |          |          |
| C     | 1.85089  | -2.08708 | -0.31328 | C                             | 1.89818  | 0.85694  | 0.27297  |
| H     | 4.52403  | 0.68589  | -0.42777 | C                             | 1.92091  | 2.25351  | 0.44228  |
| H     | 5.17729  | -1.65012 | -0.83966 | C                             | 2.33131  | 3.08227  | -0.59998 |
| H     | 3.44753  | -3.45142 | -0.77817 | C                             | 2.80671  | 2.49563  | -1.76871 |
| C     | 0.09003  | 1.05831  | 1.31048  | C                             | 2.94994  | 1.11379  | -1.88709 |
| C     | 0.98685  | 2.07635  | 0.60583  | C                             | 2.52424  | 0.27452  | -0.8521  |
| O     | -0.34208 | 1.22321  | 2.40435  | H                             | 2.3016   | 4.16497  | -0.48996 |
| O     | 0.59792  | 3.23175  | 0.61694  | H                             | 3.11513  | 3.13243  | -2.59643 |
| N     | 2.09659  | 1.61919  | -0.02493 | H                             | 3.33839  | 0.70539  | -2.81534 |
| C     | 2.94053  | 2.62163  | -0.66095 | C                             | 1.96635  | 0.33677  | 1.98897  |
| H     | 3.85883  | 2.79565  | -0.08646 | C                             | 1.63282  | 1.6819   | 2.66877  |
| H     | 3.20764  | 2.28845  | -1.67016 | O                             | 2.79185  | -0.4348  | 2.42421  |
| H     | 2.37651  | 3.55563  | -0.70928 | O                             | 1.44114  | 1.8177   | 3.85084  |
| Rh    | -0.53298 | -0.47378 | 0.21675  | N                             | 1.6137   | 2.68805  | 1.72135  |
| Cl    | -0.468   | -2.04233 | 1.97524  | C                             | 1.15223  | 4.01688  | 2.04127  |
| H     | 1.11039  | -2.88397 | -0.24325 | H                             | 0.87173  | 4.01088  | 3.09851  |
| C     | -0.79378 | -0.18041 | -1.94696 | H                             | 1.93678  | 4.76831  | 1.88126  |
| C     | -0.93276 | 1.09896  | -1.42899 | H                             | 0.26745  | 4.2603   | 1.43827  |
| C     | -2.92297 | -0.90829 | 0.02333  | C                             | 2.57263  | -1.19473 | -0.85687 |
| C     | -2.22253 | 1.85873  | -1.19521 | C                             | 3.47071  | -2.00222 | -1.58158 |
| C     | -2.81238 | 0.25258  | 0.7252   | C                             | 3.38594  | -3.38165 | -1.40097 |
| C     | -2.86066 | 1.65556  | 0.18635  | C                             | 1.62486  | -3.07979 | 0.16546  |
| H     | -2.006   | 2.92863  | -1.30876 | C                             | 2.46258  | -3.93606 | -0.52611 |
| H     | -2.9332  | 1.61493  | -1.9957  | H                             | 4.07617  | -4.02536 | -1.94596 |
| H     | -2.34035 | 2.3059   | 0.90328  | H                             | 0.88847  | -3.44502 | 0.87896  |
| H     | -3.90346 | 2.01257  | 0.16763  | H                             | 2.40434  | -5.00939 | -0.36563 |
| C     | -1.87647 | -1.17946 | -2.26178 | C                             | 4.53029  | -1.46088 | -2.49383 |
| H     | -2.0908  | -1.14264 | -3.34369 | H                             | 4.12611  | -1.1635  | -3.47176 |
| C     | -3.17459 | -1.03973 | -1.4564  | H                             | 5.03048  | -0.58429 | -2.06501 |
| H     | -3.76877 | -0.19378 | -1.82222 | H                             | 5.29217  | -2.22622 | -2.68224 |
| H     | -3.78437 | -1.93527 | -1.6333  | N                             | 1.67196  | -1.75627 | -0.00624 |
| H     | 0.17882  | -0.42794 | -2.3798  | Rh                            | 0.38692  | -0.40992 | 0.89908  |
| H     | -0.04185 | 1.72156  | -1.51392 | C                             | -2.24665 | 0.25077  | -1.26759 |



|                                           |          |          |          |    |          |          |          |
|-------------------------------------------|----------|----------|----------|----|----------|----------|----------|
| C                                         | -1.67337 | 1.1936   | -2.13223 | C  | 2.57223  | 0.44317  | 0.49306  |
| C                                         | -0.67066 | 0.83396  | -3.02002 | H  | 1.15761  | 3.70507  | 2.09434  |
| C                                         | -0.24197 | -0.49538 | -3.00366 | H  | 3.50588  | 3.61833  | 1.29363  |
| C                                         | -0.7458  | -1.41973 | -2.09112 | H  | 4.43583  | 1.54386  | 0.38424  |
| C                                         | -1.73816 | -1.03745 | -1.18083 | C  | -0.08129 | -0.71759 | 1.6031   |
| H                                         | -0.21784 | 1.55839  | -3.69444 | C  | -1.04136 | 0.35133  | 2.16948  |
| H                                         | 0.5385   | -0.80745 | -3.69797 | O  | 0.28322  | -1.67316 | 2.23314  |
| H                                         | -0.33393 | -2.4284  | -2.04959 | O  | -2.07811 | 0.0666   | 2.72235  |
| C                                         | -3.30702 | 0.93186  | -0.50808 | N  | -0.5767  | 1.62174  | 1.93702  |
| C                                         | -3.18438 | 2.42477  | -0.91557 | C  | -1.29831 | 2.76732  | 2.44237  |
| O                                         | -4.19713 | 0.47562  | 0.1685   | H  | -0.86038 | 3.14464  | 3.37739  |
| O                                         | -3.80975 | 3.36441  | -0.49478 | H  | -1.29601 | 3.56682  | 1.69103  |
| N                                         | -2.22824 | 2.45624  | -1.92529 | H  | -2.32561 | 2.4488   | 2.64109  |
| C                                         | -1.72948 | 3.67411  | -2.50776 | C  | 3.02678  | -0.87948 | 0.04458  |
| H                                         | -0.66078 | 3.80073  | -2.28162 | C  | 4.33469  | -1.3947  | 0.13571  |
| H                                         | -1.87064 | 3.68343  | -3.59674 | C  | 4.53383  | -2.71101 | -0.27956 |
| H                                         | -2.29377 | 4.50088  | -2.06593 | C  | 2.22741  | -2.91978 | -0.80585 |
| C                                         | -2.10752 | -1.87738 | -0.00914 | C  | 3.49019  | -3.48449 | -0.7604  |
| C                                         | -3.25402 | -2.67401 | 0.03965  | H  | 5.53559  | -3.13455 | -0.20577 |
| C                                         | -3.50375 | -3.36027 | 1.22582  | H  | 1.35446  | -3.45127 | -1.17843 |
| C                                         | -1.5392  | -2.40091 | 2.18242  | H  | 3.64234  | -4.51111 | -1.08199 |
| C                                         | -2.64702 | -3.22297 | 2.30967  | C  | 5.50531  | -0.6431  | 0.69677  |
| H                                         | -4.38987 | -3.99052 | 1.29954  | H  | 5.91183  | 0.09125  | -0.01242 |
| H                                         | -0.84114 | -2.23111 | 3.00054  | H  | 5.24659  | -0.10515 | 1.61687  |
| H                                         | -2.83764 | -3.73429 | 3.24973  | H  | 6.31781  | -1.34006 | 0.93298  |
| C                                         | -4.19534 | -2.73034 | -1.12058 | N  | 2.01435  | -1.66326 | -0.409   |
| H                                         | -3.66211 | -2.77812 | -2.07816 | Rh | 0.09737  | -0.78352 | -0.40832 |
| H                                         | -4.8626  | -3.59727 | -1.05122 | Cl | -0.54787 | -2.10191 | -2.27022 |
| H                                         | -4.81812 | -1.82491 | -1.13553 | C  | -1.31557 | 0.79757  | -0.90651 |
| N                                         | -1.27166 | -1.75414 | 1.04032  | C  | -2.00752 | -0.15749 | -0.48996 |
| Cl                                        | -1.16422 | 1.27064  | 1.6292   | C  | -0.91247 | 2.10246  | -1.33653 |
|                                           |          |          |          | C  | 0.28089  | 2.31823  | -2.03818 |
|                                           |          |          |          | C  | -1.73033 | 3.197    | -1.01647 |
|                                           |          |          |          | C  | 0.65383  | 3.60647  | -2.39542 |
|                                           |          |          |          | H  | 0.90477  | 1.46115  | -2.29103 |
|                                           |          |          |          | C  | -1.34827 | 4.48288  | -1.37365 |
|                                           |          |          |          | H  | -2.66138 | 3.01733  | -0.4774  |
|                                           |          |          |          | C  | -0.15256 | 4.69096  | -2.05784 |
|                                           |          |          |          | H  | 1.58301  | 3.76643  | -2.93946 |
| <b>57</b>                                 |          |          |          |    |          |          |          |
| <b>Me<sup>e</sup>TS<sub>AI-B</sub>(2)</b> |          |          |          |    |          |          |          |
| C                                         | 1.1856   | 0.571    | 0.72844  | H  | 0.90477  | 1.46115  | -2.29103 |
| C                                         | 0.71835  | 1.70477  | 1.40856  | C  | -1.34827 | 4.48288  | -1.37365 |
| C                                         | 1.5408   | 2.81037  | 1.60735  | H  | -2.66138 | 3.01733  | -0.4774  |
| C                                         | 2.86299  | 2.74749  | 1.18284  | C  | -0.15256 | 4.69096  | -2.05784 |
| C                                         | 3.39085  | 1.56651  | 0.67407  | H  | 1.58301  | 3.76643  | -2.93946 |

|   |          |          |          |
|---|----------|----------|----------|
| H | -1.98642 | 5.32758  | -1.11872 |
| H | 0.14685  | 5.70026  | -2.3351  |
| C | -3.17191 | -0.93264 | -0.17878 |
| C | -3.09516 | -2.22801 | 0.34408  |
| C | -4.42803 | -0.34343 | -0.38741 |
| C | -4.25802 | -2.92049 | 0.6488   |
| H | -2.11781 | -2.68151 | 0.50234  |
| C | -5.58533 | -1.04374 | -0.08285 |
| H | -4.47803 | 0.66547  | -0.79652 |
| C | -5.50252 | -2.33304 | 0.43751  |
| H | -4.19153 | -3.92712 | 1.05717  |
| H | -6.55704 | -0.58207 | -0.25033 |
| H | -6.41127 | -2.88151 | 0.68002  |

### 53

#### MeTS<sub>A1-B</sub>(3)

|   |          |          |          |
|---|----------|----------|----------|
| C | 0.96233  | 1.13903  | -0.12059 |
| C | 0.48011  | 2.45791  | -0.17246 |
| C | 1.01799  | 3.39071  | -1.05246 |
| C | 2.10528  | 3.01327  | -1.834   |
| C | 2.71346  | 1.77302  | -1.66492 |
| C | 2.18292  | 0.83816  | -0.76932 |
| H | 0.61079  | 4.39816  | -1.11477 |
| H | 2.51882  | 3.71765  | -2.55318 |
| H | 3.5811   | 1.52858  | -2.26916 |
| C | 0.52981  | 0.76232  | 1.64618  |
| C | -0.41401 | 1.95317  | 1.91273  |
| O | 1.33946  | 0.38465  | 2.45803  |
| O | -1.04498 | 2.10514  | 2.93294  |
| N | -0.47384 | 2.76886  | 0.80359  |
| C | -1.28921 | 3.95979  | 0.7866   |
| H | -0.67832 | 4.87096  | 0.84705  |
| H | -1.8952  | 3.99216  | -0.12848 |
| H | -1.94529 | 3.91752  | 1.66068  |
| C | 2.77415  | -0.46715 | -0.44519 |
| C | 4.13452  | -0.81413 | -0.54949 |
| C | 4.50744  | -2.07702 | -0.08919 |
| C | 2.25865  | -2.53657 | 0.52971  |
| C | 3.57816  | -2.95086 | 0.44853  |

|    |          |          |          |
|----|----------|----------|----------|
| H  | 5.55753  | -2.36392 | -0.14486 |
| H  | 1.46801  | -3.16699 | 0.93003  |
| H  | 3.86564  | -3.93195 | 0.81667  |
| C  | 5.20478  | 0.09904  | -1.06938 |
| H  | 5.20356  | 0.16554  | -2.16607 |
| H  | 5.1045   | 1.11785  | -0.67581 |
| H  | 6.19158  | -0.27679 | -0.77508 |
| N  | 1.88115  | -1.33309 | 0.09696  |
| C  | -4.84029 | -0.07347 | -1.66892 |
| C  | -5.07761 | -0.82303 | -0.58778 |
| C  | -1.94797 | 0.25787  | -0.66718 |
| C  | -4.16957 | -1.7898  | 0.12008  |
| C  | -2.32943 | -0.04177 | 0.63288  |
| C  | -3.25878 | -1.11251 | 1.14989  |
| H  | -4.78857 | -2.51725 | 0.6641   |
| H  | -3.56577 | -2.38179 | -0.57468 |
| H  | -3.89699 | -0.61505 | 1.89818  |
| H  | -2.69547 | -1.8802  | 1.69547  |
| C  | -3.61099 | 0.04454  | -2.52282 |
| H  | -3.78674 | -0.45734 | -3.48942 |
| C  | -2.2917  | -0.46899 | -1.93769 |
| H  | -2.30761 | -1.55098 | -1.79379 |
| H  | -1.4923  | -0.27788 | -2.66981 |
| Rh | -0.10641 | -0.61686 | 0.25943  |
| Cl | -0.86332 | -2.86749 | 0.04179  |
| H  | -5.66397 | 0.56199  | -2.00649 |
| H  | -6.06452 | -0.70318 | -0.13199 |
| H  | -1.65774 | 1.2981   | -0.84539 |
| H  | -2.23994 | 0.78045  | 1.34016  |
| H  | -3.48556 | 1.11055  | -2.78095 |

### 53

#### MeTS<sub>A1-B</sub>(4)

|   |          |         |          |
|---|----------|---------|----------|
| C | 0.43112  | 1.3006  | -0.01311 |
| C | -0.16034 | 2.57697 | 0.0091   |
| C | 0.39608  | 3.61775 | 0.74681  |
| C | 1.60572  | 3.39856 | 1.3985   |
| C | 2.30543  | 2.20826 | 1.22411  |
| C | 1.75233  | 1.16644 | 0.46839  |

|   |          |          |          |                               |          |          |          |
|---|----------|----------|----------|-------------------------------|----------|----------|----------|
| H | -0.09235 | 4.58973  | 0.79272  | H                             | -2.57621 | 1.30305  | 2.69153  |
| H | 2.03864  | 4.18879  | 2.00879  | Rh                            | -0.47955 | -0.62918 | -0.10539 |
| H | 3.26808  | 2.09237  | 1.71093  | Cl                            | -1.0025  | -2.50472 | -1.73133 |
| C | -0.21639 | 0.7478   | -1.68279 | H                             | 0.86053  | -1.15341 | 2.26144  |
| C | -1.37745 | 1.74762  | -1.80568 | H                             | -0.10727 | -3.03504 | 1.20388  |
| O | 0.53973  | 0.52569  | -2.59828 | H                             | -2.39653 | 1.29912  | 0.36773  |
| O | -2.28946 | 1.66114  | -2.5955  | H                             | -3.03943 | -0.53656 | -1.00024 |
| N | -1.25918 | 2.73301  | -0.84067 | H                             | -0.2897  | 0.8179   | 2.91057  |
| C | -2.21323 | 3.81063  | -0.74023 |                               |          |          |          |
| H | -2.65316 | 3.84782  | 0.26698  | <b>53</b>                     |          |          |          |
| H | -1.74899 | 4.78066  | -0.96259 | <b>MeTS<sub>A1-B</sub>(5)</b> |          |          |          |
| H | -2.99853 | 3.61467  | -1.47673 | C                             | -0.43768 | 1.32816  | -0.0001  |
| C | 2.42316  | -0.09277 | 0.11925  | C                             | 0.14437  | 2.60769  | 0.03173  |
| C | 3.81376  | -0.3141  | 0.07656  | C                             | -0.39949 | 3.62911  | 0.80552  |
| C | 4.25272  | -1.55992 | -0.37035 | C                             | -1.58208 | 3.38152  | 1.49537  |
| C | 2.00426  | -2.24536 | -0.72961 | C                             | -2.2756  | 2.18698  | 1.32258  |
| C | 3.35738  | -2.53635 | -0.77104 | C                             | -1.74023 | 1.16951  | 0.52254  |
| H | 5.32503  | -1.74936 | -0.41896 | H                             | 0.07938  | 4.60567  | 0.8548   |
| H | 1.23353  | -2.93279 | -1.07893 | H                             | -2.00123 | 4.15387  | 2.13748  |
| H | 3.69351  | -3.50187 | -1.13931 | H                             | -3.21856 | 2.05012  | 1.84173  |
| C | 4.84687  | 0.71374  | 0.43207  | C                             | 0.18646  | 0.79977  | -1.67682 |
| H | 5.82913  | 0.39611  | 0.06357  | C                             | 1.34126  | 1.80482  | -1.80475 |
| H | 4.62504  | 1.69217  | -0.01108 | O                             | -0.57897 | 0.57803  | -2.58556 |
| H | 4.9448   | 0.85545  | 1.51719  | O                             | 2.25218  | 1.72085  | -2.59563 |
| N | 1.56271  | -1.06337 | -0.29339 | N                             | 1.22523  | 2.78542  | -0.83408 |
| C | -0.22728 | -1.15828 | 2.15684  | C                             | 2.19863  | 3.84223  | -0.70476 |
| C | -0.79158 | -2.26661 | 1.56615  | H                             | 1.75212  | 4.82748  | -0.89354 |
| C | -2.32994 | 0.31246  | 0.81642  | H                             | 2.64342  | 3.83796  | 0.30154  |
| C | -2.24498 | -2.67335 | 1.65603  | H                             | 2.97742  | 3.65532  | -1.4508  |
| C | -2.73495 | -0.75136 | 0.02635  | C                             | -2.41509 | -0.0826  | 0.15205  |
| C | -3.15578 | -2.09248 | 0.56012  | C                             | -3.80543 | -0.31095 | 0.13637  |
| H | -2.29723 | -3.76796 | 1.59826  | C                             | -4.25005 | -1.52959 | -0.37495 |
| H | -2.6271  | -2.4136  | 2.65402  | C                             | -2.00901 | -2.17849 | -0.83391 |
| H | -3.1934  | -2.78738 | -0.28372 | C                             | -3.36157 | -2.4716  | -0.86526 |
| H | -4.18741 | -2.00031 | 0.94381  | H                             | -5.32223 | -1.72354 | -0.40489 |
| C | -0.93708 | -0.07242 | 2.91818  | H                             | -1.24146 | -2.83988 | -1.23781 |
| H | -1.04612 | -0.35514 | 3.9799   | H                             | -3.70398 | -3.41206 | -1.28851 |
| C | -2.29831 | 0.30253  | 2.33131  | C                             | -4.8312  | 0.68625  | 0.58643  |
| H | -3.07871 | -0.3753  | 2.70364  | H                             | -4.87772 | 0.77814  | 1.6802   |

|    |          |          |          |    |          |          |          |
|----|----------|----------|----------|----|----------|----------|----------|
| H  | -4.63966 | 1.68618  | 0.17809  | O  | 0.03333  | 0.65912  | -2.53084 |
| H  | -5.82689 | 0.37422  | 0.25076  | O  | -2.27007 | 2.432    | -2.04627 |
| N  | -1.56236 | -1.02686 | -0.32769 | N  | -0.95306 | 2.98661  | -0.25039 |
| C  | 0.6067   | -2.35729 | 1.50201  | C  | -1.6272  | 4.23625  | 0.01719  |
| C  | 0.40021  | -1.21563 | 2.22625  | H  | -1.85459 | 4.32434  | 1.08681  |
| C  | 2.71367  | -0.85456 | 0.12251  | H  | -1.01932 | 5.09788  | -0.29208 |
| C  | 1.49444  | -0.50296 | 2.97921  | H  | -2.55558 | 4.23792  | -0.5609  |
| C  | 2.33951  | 0.34123  | 0.71608  | C  | 2.40918  | -0.34126 | -0.19842 |
| C  | 2.13569  | 0.63133  | 2.18065  | C  | 3.73584  | -0.74675 | -0.45484 |
| H  | 1.08733  | -0.09507 | 3.91441  | C  | 3.92296  | -1.89541 | -1.22038 |
| H  | 2.25705  | -1.23355 | 3.28191  | C  | 1.57878  | -2.15616 | -1.42839 |
| H  | 1.49937  | 1.52731  | 2.25604  | C  | 2.84984  | -2.60607 | -1.73203 |
| H  | 3.10406  | 0.91531  | 2.63022  | H  | 4.94115  | -2.21988 | -1.43373 |
| C  | 1.92772  | -3.04116 | 1.2888   | H  | 0.69628  | -2.66376 | -1.81109 |
| H  | 2.21082  | -3.60133 | 2.19662  | H  | 2.98841  | -3.48275 | -2.35839 |
| C  | 3.08478  | -2.1169  | 0.87415  | C  | 4.95328  | -0.01223 | 0.01863  |
| H  | 3.67018  | -1.81689 | 1.75752  | H  | 5.85423  | -0.46203 | -0.41414 |
| H  | 3.76809  | -2.69471 | 0.23982  | H  | 4.93713  | 1.04592  | -0.27122 |
| Rh | 0.48055  | -0.60648 | -0.13475 | H  | 5.06159  | -0.05771 | 1.11033  |
| Cl | 1.049    | -2.45314 | -1.7673  | N  | 1.37402  | -1.08137 | -0.67064 |
| H  | -0.26998 | -2.92952 | 1.19279  | C  | -1.26326 | -2.61804 | 0.04454  |
| H  | -0.62755 | -0.9177  | 2.44394  | C  | -1.80912 | -1.97973 | -1.06071 |
| H  | 3.07207  | -0.78686 | -0.90528 | C  | -2.21422 | -0.39438 | 1.55913  |
| H  | 2.54615  | 1.23253  | 0.12889  | C  | -3.27075 | -1.59372 | -1.11989 |
| H  | 1.78259  | -3.77995 | 0.49356  | C  | -2.59969 | 0.31342  | 0.43311  |
|    |          |          |          | C  | -3.53825 | -0.16409 | -0.64621 |
|    |          |          |          | H  | -3.62907 | -1.70115 | -2.15182 |
|    |          |          |          | H  | -3.85154 | -2.31462 | -0.52654 |
|    |          |          |          | H  | -3.44222 | 0.52233  | -1.49609 |
|    |          |          |          | H  | -4.57938 | -0.06251 | -0.29347 |
|    |          |          |          | C  | -2.0108  | -2.94816 | 1.30742  |
|    |          |          |          | H  | -2.71381 | -3.77777 | 1.11898  |
|    |          |          |          | C  | -2.75771 | -1.75711 | 1.92543  |
|    |          |          |          | H  | -3.82179 | -1.77893 | 1.64324  |
|    |          |          |          | H  | -2.72328 | -1.85284 | 3.01742  |
|    |          |          |          | Rh | -0.51145 | -0.50103 | 0.07109  |
|    |          |          |          | Cl | 0.58994  | -1.35758 | 2.3298   |
|    |          |          |          | H  | -0.3249  | -3.16282 | -0.06703 |
|    |          |          |          | H  | -1.27751 | -2.00866 | -2.01536 |

## 53

### MeTS<sub>A1-B</sub>(6)

|   |          |         |          |    |          |          |          |
|---|----------|---------|----------|----|----------|----------|----------|
| C | 0.63116  | 1.27144 | 0.18604  | H  | -3.44222 | 0.52233  | -1.49609 |
| C | 0.2331   | 2.59658 | 0.39157  | H  | -4.57938 | -0.06251 | -0.29347 |
| C | 1.04588  | 3.4927  | 1.08095  | C  | -2.0108  | -2.94816 | 1.30742  |
| C | 2.29746  | 3.06091 | 1.50468  | H  | -2.71381 | -3.77777 | 1.11898  |
| C | 2.78677  | 1.81274 | 1.13579  | C  | -2.75771 | -1.75711 | 1.92543  |
| C | 1.97977  | 0.92509 | 0.41445  | H  | -3.82179 | -1.77893 | 1.64324  |
| H | 0.71754  | 4.51317 | 1.27024  | H  | -2.72328 | -1.85284 | 3.01742  |
| H | 2.9285   | 3.7304  | 2.08594  | Rh | -0.51145 | -0.50103 | 0.07109  |
| H | 3.7845   | 1.53345 | 1.45174  | Cl | 0.58994  | -1.35758 | 2.3298   |
| C | -0.45451 | 0.94089 | -1.46209 | H  | -0.3249  | -3.16282 | -0.06703 |
| C | -1.32725 | 2.2046  | -1.31713 | H  | -1.27751 | -2.00866 | -2.01536 |

|   |          |          |         |
|---|----------|----------|---------|
| H | -1.72905 | 0.16109  | 2.36125 |
| H | -2.49008 | 1.39429  | 0.50054 |
| H | -1.27125 | -3.30501 | 2.03083 |

**53**  
MeTS<sub>A1-B</sub>(7)

|   |          |          |          |
|---|----------|----------|----------|
| C | -1.04872 | 1.01923  | 0.24119  |
| C | -2.39626 | 1.08373  | 0.63884  |
| C | -2.75559 | 1.78443  | 1.78954  |
| C | -1.77261 | 2.48051  | 2.48229  |
| C | -0.46781 | 2.57762  | 1.99861  |
| C | -0.10296 | 1.88129  | 0.84317  |
| H | -3.78896 | 1.79371  | 2.13045  |
| H | -2.03814 | 3.00562  | 3.39817  |
| H | 0.25627  | 3.16471  | 2.55461  |
| C | -1.2706  | 0.56834  | -1.50991 |
| C | -2.75873 | 0.16146  | -1.45826 |
| O | -0.8185  | 1.20573  | -2.43536 |
| O | -3.35385 | -0.34109 | -2.3782  |
| N | -3.30085 | 0.50829  | -0.23639 |
| C | -4.63832 | 0.11031  | 0.13008  |
| H | -4.60344 | -0.57871 | 0.98424  |
| H | -5.26272 | 0.97968  | 0.37407  |
| H | -5.06526 | -0.40734 | -0.73368 |
| C | 1.17654  | 1.9664   | 0.12518  |
| C | 2.02869  | 3.08853  | 0.09021  |
| C | 3.04717  | 3.09175  | -0.86064 |
| C | 2.32722  | 0.96934  | -1.64404 |
| C | 3.1873   | 2.0462   | -1.75978 |
| H | 3.70956  | 3.95518  | -0.91782 |
| H | 2.37183  | 0.13535  | -2.33878 |
| H | 3.93555  | 2.06733  | -2.54742 |
| C | 1.86301  | 4.29234  | 0.96776  |
| H | 2.51828  | 5.10132  | 0.62516  |
| H | 0.83225  | 4.66812  | 0.95706  |
| H | 2.1265   | 4.08578  | 2.01375  |
| N | 1.38988  | 0.9038   | -0.69653 |
| C | 1.05629  | -1.66718 | 2.17582  |
| C | 2.24127  | -1.17492 | 1.79781  |

|    |          |          |          |
|----|----------|----------|----------|
| C  | 0.81794  | -2.92628 | -0.61753 |
| C  | 3.28598  | -1.97838 | 1.08948  |
| C  | 1.82828  | -2.12685 | -1.07297 |
| C  | 3.17582  | -1.89758 | -0.44086 |
| H  | 4.28946  | -1.62678 | 1.36861  |
| H  | 3.23508  | -3.02454 | 1.41674  |
| H  | 3.56321  | -0.92141 | -0.76574 |
| H  | 3.86858  | -2.63504 | -0.88326 |
| C  | 0.59402  | -3.08749 | 2.00823  |
| H  | 1.05777  | -3.71807 | 2.78533  |
| C  | 0.8388   | -3.76637 | 0.63985  |
| H  | 1.79942  | -4.30353 | 0.65567  |
| H  | 0.06701  | -4.53745 | 0.52599  |
| Rh | -0.00131 | -0.66021 | -0.40836 |
| H  | 0.35305  | -0.99372 | 2.67294  |
| H  | 2.4536   | -0.11676 | 1.97178  |
| H  | 0.04117  | -3.17936 | -1.33785 |
| H  | 1.76287  | -1.83792 | -2.12587 |
| H  | -0.48429 | -3.10755 | 2.197    |
| Cl | -1.86614 | -2.11998 | 0.14761  |

**53**  
MeTS<sub>A1-B</sub>(8)

|   |          |         |          |
|---|----------|---------|----------|
| C | 1.02309  | 1.43561 | 0.1726   |
| C | 0.34781  | 2.64302 | -0.04873 |
| C | 0.82774  | 3.55315 | -0.97609 |
| C | 1.96174  | 3.20546 | -1.71017 |
| C | 2.61088  | 1.98801 | -1.52209 |
| C | 2.15205  | 1.08422 | -0.5627  |
| H | 0.31756  | 4.49711 | -1.15415 |
| H | 2.34128  | 3.90219 | -2.45552 |
| H | 3.48537  | 1.73009 | -2.11735 |
| C | 0.30588  | 0.62354 | 1.16736  |
| C | -1.33563 | 1.62992 | 1.24516  |
| O | 0.68487  | 0.21148 | 2.23607  |
| O | -2.22227 | 1.53596 | 2.05251  |
| N | -0.79651 | 2.79564 | 0.74068  |
| C | -1.59601 | 4.00343 | 0.71484  |

|    |          |          |          |                               |          |          |          |
|----|----------|----------|----------|-------------------------------|----------|----------|----------|
| H  | -0.97438 | 4.87223  | 0.96143  | <b>53</b>                     |          |          |          |
| H  | -2.05201 | 4.12962  | -0.2778  | <b>MeTS<sub>A1-B(9)</sub></b> |          |          |          |
| H  | -2.38402 | 3.898    | 1.46443  | C                             | 1.20697  | 1.29898  | 0.03258  |
| C  | 2.82476  | -0.22511 | -0.33849 | C                             | 0.59551  | 2.51949  | -0.27296 |
| C  | 3.62894  | -0.43008 | 0.79706  | C                             | 1.13739  | 3.34922  | -1.24638 |
| C  | 4.20023  | -1.69257 | 0.94159  | C                             | 2.26601  | 2.90637  | -1.93736 |
| C  | 3.18572  | -2.35245 | -1.10873 | C                             | 2.84242  | 1.66899  | -1.66979 |
| C  | 3.97783  | -2.67489 | -0.01435 | C                             | 2.32243  | 0.84765  | -0.66494 |
| H  | 4.82804  | -1.89742 | 1.80935  | H                             | 0.6839   | 4.30991  | -1.48103 |
| H  | 2.99414  | -3.08906 | -1.89269 | H                             | 2.69551  | 3.54207  | -2.70961 |
| H  | 4.41813  | -3.6653  | 0.08079  | H                             | 3.71049  | 1.33093  | -2.2337  |
| C  | 3.86883  | 0.65268  | 1.80319  | C                             | 0.52647  | 0.59216  | 1.12705  |
| H  | 4.13414  | 1.60123  | 1.31819  | C                             | -1.12893 | 1.72335  | 1.17057  |
| H  | 2.96542  | 0.83247  | 2.40128  | O                             | 1.02235  | 0.15564  | 2.11742  |
| H  | 4.68171  | 0.37859  | 2.48617  | O                             | -2.01122 | 1.87424  | 1.98166  |
| N  | 2.61588  | -1.15857 | -1.27337 | N                             | -0.5696  | 2.77503  | 0.44888  |
| C  | -1.56398 | -1.67167 | 1.53911  | C                             | -1.19469 | 4.08129  | 0.46078  |
| C  | -0.41466 | -2.08769 | 0.86015  | H                             | -0.45498 | 4.85656  | 0.69571  |
| C  | -2.74621 | -1.62766 | -1.03691 | H                             | -1.65697 | 4.30802  | -0.51096 |
| C  | -0.30735 | -3.22116 | -0.13861 | H                             | -1.9668  | 4.06848  | 1.23434  |
| C  | -1.54301 | -1.68823 | -1.72721 | C                             | 2.92193  | -0.49022 | -0.38984 |
| C  | -0.48234 | -2.74047 | -1.5804  | C                             | 3.8658   | -0.65972 | 0.63391  |
| H  | 0.68554  | -3.68003 | -0.03382 | C                             | 4.37861  | -1.9434  | 0.80454  |
| H  | -1.02683 | -4.01337 | 0.10658  | C                             | 3.01219  | -2.69664 | -0.99556 |
| H  | 0.46243  | -2.29282 | -1.92371 | C                             | 3.95103  | -2.98092 | -0.01275 |
| H  | -0.69394 | -3.5871  | -2.25635 | H                             | 5.11417  | -2.12344 | 1.58895  |
| C  | -2.95365 | -2.22452 | 1.38687  | H                             | 2.64909  | -3.48012 | -1.6634  |
| H  | -3.10705 | -3.07072 | 2.07824  | H                             | 4.33741  | -3.99038 | 0.10938  |
| C  | -3.28603 | -2.63153 | -0.0514  | C                             | 4.28097  | 0.47706  | 1.51431  |
| H  | -2.9052  | -3.63476 | -0.27759 | H                             | 4.58704  | 1.35611  | 0.93169  |
| H  | -4.37631 | -2.68664 | -0.16788 | H                             | 3.44484  | 0.78419  | 2.15702  |
| Rh | -1.27576 | -0.2321  | -0.06537 | H                             | 5.11771  | 0.18917  | 2.16152  |
| Cl | -2.08903 | 1.39521  | -1.65541 | N                             | 2.5073   | -1.47821 | -1.18918 |
| H  | -1.40164 | -1.08499 | 2.44605  | C                             | -1.21759 | 0.34548  | -1.66294 |
| H  | 0.53209  | -1.80652 | 1.31788  | C                             | -2.55169 | 0.48713  | -1.29278 |
| H  | -3.45666 | -0.87781 | -1.39054 | C                             | -1.43328 | -2.28527 | -0.6213  |
| H  | -1.45052 | -1.03772 | -2.59874 | C                             | -3.6473  | -0.44818 | -1.75944 |
| H  | -3.65073 | -1.43639 | 1.70743  | C                             | -2.69765 | -2.08258 | -0.06774 |
|    |          |          |          | C                             | -3.92688 | -1.57979 | -0.77086 |

|                                |          |          |          |    |          |          |          |
|--------------------------------|----------|----------|----------|----|----------|----------|----------|
| H                              | -4.56739 | 0.12789  | -1.92292 | C  | -5.46713 | 2.97334  | -1.02737 |
| H                              | -3.36734 | -0.85548 | -2.74139 | C  | -4.10477 | 2.04924  | -2.75207 |
| H                              | -4.61446 | -1.21598 | 0.00556  | C  | -4.80542 | 3.13348  | -2.23852 |
| H                              | -4.44958 | -2.41329 | -1.27113 | H  | -6.03451 | 3.79765  | -0.59321 |
| C                              | -0.61755 | -0.76565 | -2.47801 | H  | -3.56462 | 2.12455  | -3.69632 |
| H                              | -0.79016 | -0.58005 | -3.55283 | H  | -4.83259 | 4.07878  | -2.77624 |
| C                              | -1.10184 | -2.16447 | -2.08935 | C  | -6.07811 | 1.55714  | 0.9733   |
| H                              | -1.97987 | -2.46059 | -2.68233 | H  | -6.70715 | 0.65688  | 0.97683  |
| H                              | -0.31132 | -2.88737 | -2.33259 | H  | -5.32052 | 1.43456  | 1.7584   |
| Rh                             | -1.4725  | -0.34512 | 0.45073  | H  | -6.70874 | 2.41635  | 1.23165  |
| Cl                             | -1.39295 | -1.43923 | 2.55951  | N  | -4.0401  | 0.87198  | -2.13043 |
| H                              | -0.61748 | 1.25191  | -1.6663  | Rh | -0.70203 | 0.23218  | 0.06215  |
| H                              | -2.87773 | 1.4785   | -0.96412 | Cl | -0.02195 | 1.02897  | -2.00751 |
| H                              | -0.72769 | -2.84465 | -0.00291 | C  | 2.81692  | 2.17589  | 0.22826  |
| H                              | -2.88065 | -2.54422 | 0.90307  | C  | 4.05288  | 1.51564  | 0.14962  |
| H                              | 0.46995  | -0.72962 | -2.32756 | C  | 4.39127  | 0.53761  | 1.06977  |
|                                |          |          |          | C  | 3.43949  | 0.20187  | 2.0386   |
|                                |          |          |          | C  | 2.19327  | 0.82257  | 2.10891  |
|                                |          |          |          | C  | 1.88251  | 1.84232  | 1.20637  |
| <b>95</b>                      |          |          |          | H  | 5.36873  | 0.05824  | 1.04416  |
| <b>MeTS<sub>A1-B</sub>(10)</b> |          |          |          | H  | 3.68249  | -0.56816 | 2.77058  |
| C                              | -3.46542 | -0.76452 | 0.64224  | H  | 1.45884  | 0.52884  | 2.85666  |
| C                              | -3.24202 | -2.0075  | 1.23676  | C  | 2.81216  | 3.21493  | -0.81073 |
| C                              | -4.01573 | -3.10948 | 0.91376  | C  | 4.17089  | 3.04553  | -1.54972 |
| C                              | -5.02936 | -2.93502 | -0.03372 | O  | 2.01929  | 4.09186  | -1.05513 |
| C                              | -5.25626 | -1.69976 | -0.63186 | O  | 4.58852  | 3.69743  | -2.4742  |
| C                              | -4.47593 | -0.58797 | -0.29156 | N  | 4.82951  | 2.01708  | -0.89633 |
| H                              | -3.8517  | -4.07845 | 1.38287  | C  | 6.16353  | 1.58328  | -1.23487 |
| H                              | -5.65187 | -3.78557 | -0.30662 | H  | 6.85678  | 1.76445  | -0.40156 |
| H                              | -6.04546 | -1.58522 | -1.37433 | H  | 6.17367  | 0.5192   | -1.50264 |
| C                              | -2.5139  | 0.23751  | 1.19984  | H  | 6.48132  | 2.17462  | -2.09874 |
| C                              | -1.50824 | -0.74431 | 2.16331  | C  | 0.66193  | 2.68381  | 1.27305  |
| O                              | -2.89268 | 1.28247  | 1.73395  | C  | 0.75539  | 3.97812  | 1.80349  |
| O                              | -0.67886 | -0.42177 | 2.98753  | C  | -0.32269 | 4.83214  | 1.60554  |
| N                              | -2.1755  | -1.96312 | 2.1545   | C  | -1.45563 | 3.0894   | 0.44551  |
| C                              | -2.09613 | -2.8601  | 3.28575  | C  | -1.42    | 4.40219  | 0.87634  |
| H                              | -3.02689 | -2.83191 | 3.86967  | H  | -0.27719 | 5.84916  | 1.99541  |
| H                              | -1.91936 | -3.89687 | 2.96788  | H  | -2.30838 | 2.69906  | -0.09931 |
| H                              | -1.26227 | -2.52615 | 3.91191  | H  | -2.25505 | 5.06199  | 0.65619  |
| C                              | -4.65967 | 0.73598  | -0.95329 |    |          |          |          |
| C                              | -5.40593 | 1.75866  | -0.34767 |    |          |          |          |

|   |          |          |          |    |          |          |          |
|---|----------|----------|----------|----|----------|----------|----------|
| C | 1.99484  | 4.45658  | 2.49674  | C  | -2.91392 | -1.14529 | -0.64826 |
| H | 2.47071  | 3.66601  | 3.08915  | C  | -2.51764 | -2.13618 | -1.56202 |
| H | 2.73804  | 4.8153   | 1.77064  | C  | -3.18834 | -2.33638 | -2.75554 |
| H | 1.76236  | 5.29364  | 3.16611  | C  | -4.25405 | -1.49262 | -3.06146 |
| N | -0.45438 | 2.22927  | 0.68463  | C  | -4.66642 | -0.51663 | -2.16782 |
| C | 2.24648  | -2.47763 | -0.15996 | C  | -4.02771 | -0.34691 | -0.93189 |
| C | 3.30855  | -2.74073 | 0.71995  | H  | -2.87394 | -3.10984 | -3.45259 |
| C | 3.09522  | -3.25489 | 1.9871   | H  | -4.7761  | -1.61284 | -4.00908 |
| C | 1.77266  | -3.51669 | 2.35226  | H  | -5.51376 | 0.12474  | -2.40191 |
| C | 0.71726  | -3.30252 | 1.47239  | C  | -1.981   | -1.03707 | 0.50661  |
| C | 0.93489  | -2.77026 | 0.1988   | C  | -0.84044 | -2.52839 | 0.03052  |
| H | 3.91951  | -3.45944 | 2.66811  | O  | -2.29299 | -0.8503  | 1.66683  |
| H | 1.56576  | -3.92709 | 3.33981  | O  | -0.20816 | -3.26093 | 0.76567  |
| H | -0.29469 | -3.5811  | 1.74947  | N  | -1.45326 | -2.93405 | -1.12534 |
| C | 2.82337  | -1.96893 | -1.40974 | C  | -1.13933 | -4.20192 | -1.74271 |
| C | 4.35651  | -1.91436 | -1.14325 | H  | -2.03559 | -4.83099 | -1.82731 |
| O | 2.30805  | -1.68572 | -2.46149 | H  | -0.71362 | -4.04441 | -2.74322 |
| O | 5.22422  | -1.52204 | -1.88692 | H  | -0.40769 | -4.70834 | -1.10706 |
| N | 4.53623  | -2.43436 | 0.12543  | C  | -4.62018 | 0.66523  | -0.01314 |
| C | 5.82196  | -2.61216 | 0.74529  | C  | -5.21622 | 0.30053  | 1.20817  |
| H | 5.88304  | -2.063   | 1.69618  | C  | -5.76599 | 1.33267  | 1.96738  |
| H | 6.02558  | -3.67382 | 0.93932  | C  | -5.19608 | 2.87298  | 0.248    |
| H | 6.57547  | -2.22236 | 0.05286  | C  | -5.74413 | 2.64008  | 1.50358  |
| C | -0.16233 | -2.73195 | -0.80355 | H  | -6.2342  | 1.09471  | 2.92343  |
| C | -0.35061 | -3.87568 | -1.59565 | H  | -5.19624 | 3.87613  | -0.18378 |
| C | -1.36304 | -3.84364 | -2.54926 | H  | -6.17121 | 3.45421  | 2.08546  |
| C | -1.85608 | -1.60471 | -1.9027  | C  | -5.33573 | -1.12286 | 1.65773  |
| C | -2.11551 | -2.6939  | -2.71488 | H  | -5.61887 | -1.77911 | 0.82432  |
| H | -1.53823 | -4.72038 | -3.17298 | H  | -4.38352 | -1.49296 | 2.05595  |
| H | -2.41101 | -0.67689 | -2.0234  | H  | -6.099   | -1.21907 | 2.43978  |
| H | -2.89854 | -2.61989 | -3.46513 | N  | -4.65144 | 1.91397  | -0.49587 |
| C | 0.53073  | -5.08211 | -1.46263 | Rh | -0.0094  | -0.38154 | 0.0366   |
| H | 1.53511  | -4.8857  | -1.86411 | Cl | -0.36956 | 0.00028  | -2.2864  |
| H | 0.65831  | -5.39848 | -0.41968 | C  | 3.67561  | -0.31197 | -0.07966 |
| H | 0.11378  | -5.92587 | -2.0249  | C  | 4.20067  | -0.40683 | -1.3806  |
| N | -0.92168 | -1.62969 | -0.93402 | C  | 3.88471  | -1.46563 | -2.2129  |
|   |          |          |          | C  | 3.02883  | -2.44175 | -1.70227 |
|   |          |          |          | C  | 2.49195  | -2.36242 | -0.41831 |
|   |          |          |          | C  | 2.78844  | -1.27216 | 0.41102  |

84

MeTS<sub>Al-B</sub>(11)



|   |          |          |          |                                            |          |          |          |
|---|----------|----------|----------|--------------------------------------------|----------|----------|----------|
| H | 4.2821   | -1.53799 | -3.22284 | H                                          | 2.37265  | 1.80447  | -1.28367 |
| H | 2.76662  | -3.29252 | -2.3289  | H                                          | 1.2939   | 5.52282  | 0.60096  |
| H | 1.825    | -3.13936 | -0.05235 | H                                          | -1.01168 | 5.41795  | 0.46825  |
| C | 4.20038  | 0.91833  | 0.50814  | H                                          | 1.64541  | 1.47588  | 1.05915  |
| C | 5.09139  | 1.55338  | -0.59702 | H                                          | -0.56231 | 1.48913  | 1.76551  |
| O | 4.02918  | 1.40826  | 1.6022   | H                                          | 2.726    | 3.69592  | 0.21243  |
| O | 5.70525  | 2.59003  | -0.53499 |                                            |          |          |          |
| N | 5.03129  | 0.68203  | -1.66775 |                                            |          |          |          |
| C | 5.68204  | 0.91864  | -2.93186 |                                            |          |          |          |
| H | 6.40559  | 0.1246   | -3.15841 |                                            |          |          |          |
| H | 4.94563  | 0.97854  | -3.74378 |                                            |          |          |          |
| H | 6.20952  | 1.87378  | -2.8515  |                                            |          |          |          |
| C | 2.21245  | -1.19173 | 1.78602  |                                            |          |          |          |
| C | 2.9834   | -1.50633 | 2.90935  |                                            |          |          |          |
| C | 2.35474  | -1.46091 | 4.1521   |                                            |          |          |          |
| C | 0.3203   | -0.82095 | 3.0836   |                                            |          |          |          |
| C | 1.01491  | -1.12114 | 4.24464  |                                            |          |          |          |
| H | 2.92789  | -1.70501 | 5.04644  |                                            |          |          |          |
| H | -0.74155 | -0.5852  | 3.07702  |                                            |          |          |          |
| H | 0.50229  | -1.09269 | 5.20275  |                                            |          |          |          |
| C | 4.43163  | -1.86553 | 2.78724  |                                            |          |          |          |
| H | 4.61302  | -2.55803 | 1.95575  |                                            |          |          |          |
| H | 5.04124  | -0.9686  | 2.60989  |                                            |          |          |          |
| H | 4.79533  | -2.33528 | 3.70835  |                                            |          |          |          |
| N | 0.91172  | -0.84613 | 1.88386  |                                            |          |          |          |
| C | 0.87601  | 4.68976  | 0.02933  |                                            |          |          |          |
| C | -0.4568  | 4.63726  | -0.05899 |                                            |          |          |          |
| C | 0.91035  | 1.63902  | 0.26228  |                                            |          |          |          |
| C | -1.29511 | 3.62127  | -0.77973 |                                            |          |          |          |
| C | -0.41679 | 1.68577  | 0.69962  |                                            |          |          |          |
| C | -1.59388 | 2.35605  | 0.03844  |                                            |          |          |          |
| H | -2.26651 | 4.06634  | -1.04019 |                                            |          |          |          |
| H | -0.84167 | 3.33942  | -1.73694 |                                            |          |          |          |
| H | -2.31348 | 2.60169  | 0.83512  |                                            |          |          |          |
| H | -2.12032 | 1.66197  | -0.62817 |                                            |          |          |          |
| C | 1.92101  | 3.77149  | -0.53859 |                                            |          |          |          |
| H | 2.39744  | 4.25034  | -1.41137 |                                            |          |          |          |
| C | 1.48513  | 2.35191  | -0.92658 |                                            |          |          |          |
| H | 0.79755  | 2.34057  | -1.77427 |                                            |          |          |          |
|   |          |          |          | <b>84</b>                                  |          |          |          |
|   |          |          |          | <b>Me<sup>e</sup>TS<sub>A1-B</sub>(12)</b> |          |          |          |
|   |          |          |          | C                                          | 3.00412  | -0.20449 | 1.18097  |
|   |          |          |          | C                                          | 2.63261  | 0.35445  | 2.41106  |
|   |          |          |          | C                                          | 3.38706  | 1.33831  | 3.02419  |
|   |          |          |          | C                                          | 4.53963  | 1.77453  | 2.36521  |
|   |          |          |          | C                                          | 4.91568  | 1.23706  | 1.14075  |
|   |          |          |          | C                                          | 4.1543   | 0.2317   | 0.52999  |
|   |          |          |          | H                                          | 3.09073  | 1.76406  | 3.98094  |
|   |          |          |          | H                                          | 5.14814  | 2.55436  | 2.81945  |
|   |          |          |          | H                                          | 5.80681  | 1.5998   | 0.63119  |
|   |          |          |          | C                                          | 1.9621   | -1.14552 | 0.6992   |
|   |          |          |          | C                                          | 0.88259  | -1.13328 | 2.06902  |
|   |          |          |          | O                                          | 2.15899  | -2.18579 | 0.08895  |
|   |          |          |          | O                                          | 0.11072  | -2.00148 | 2.40583  |
|   |          |          |          | N                                          | 1.4483   | -0.20357 | 2.91157  |
|   |          |          |          | C                                          | 0.988    | -0.00103 | 4.26375  |
|   |          |          |          | H                                          | 1.78679  | -0.21108 | 4.98752  |
|   |          |          |          | H                                          | 0.64303  | 1.03385  | 4.40145  |
|   |          |          |          | H                                          | 0.15565  | -0.68819 | 4.4405   |
|   |          |          |          | C                                          | 4.53425  | -0.24753 | -0.82762 |
|   |          |          |          | C                                          | 5.1175   | -1.50738 | -1.03086 |
|   |          |          |          | C                                          | 5.44454  | -1.83804 | -2.34369 |
|   |          |          |          | C                                          | 4.62763  | 0.28433  | -3.05293 |
|   |          |          |          | C                                          | 5.19117  | -0.94362 | -3.37489 |
|   |          |          |          | H                                          | 5.90169  | -2.80644 | -2.55021 |
|   |          |          |          | H                                          | 4.42147  | 1.02515  | -3.82747 |
|   |          |          |          | H                                          | 5.43355  | -1.18842 | -4.4068  |
|   |          |          |          | C                                          | 5.38298  | -2.4482  | 0.10203  |
|   |          |          |          | H                                          | 5.90092  | -1.94977 | 0.93234  |
|   |          |          |          | H                                          | 4.43911  | -2.84841 | 0.49472  |
|   |          |          |          | H                                          | 6.00121  | -3.29276 | -0.22528 |

|    |          |          |          |   |          |          |          |
|----|----------|----------|----------|---|----------|----------|----------|
| N  | 4.31339  | 0.63546  | -1.80626 | C | -1.2217  | 2.60146  | 0.36808  |
| Rh | 0.0868   | -0.25337 | -0.04318 | H | -2.13835 | 4.28446  | -0.57592 |
| Cl | -1.0291  | 0.23939  | -2.04756 | H | -1.09038 | 3.3839   | -1.64274 |
| C  | -3.73733 | -0.2991  | 0.08515  | H | -1.55988 | 2.98044  | 1.34619  |
| C  | -4.29252 | 0.86703  | 0.63744  | H | -2.0024  | 1.90807  | 0.02776  |
| C  | -4.07516 | 1.21523  | 1.95988  | C | 1.9565   | 3.72188  | -1.50906 |
| C  | -3.25356 | 0.37376  | 2.71332  | H | 2.15117  | 4.1237   | -2.51819 |
| C  | -2.65066 | -0.75696 | 2.16641  | C | 1.32801  | 2.33131  | -1.63886 |
| C  | -2.87265 | -1.09894 | 0.8262   | H | 0.40459  | 2.34961  | -2.21733 |
| H  | -4.51346 | 2.11181  | 2.39452  | H | 2.02874  | 1.6928   | -2.19554 |
| H  | -3.06972 | 0.61498  | 3.75984  | H | 1.81733  | 5.59446  | -0.3919  |
| H  | -1.98971 | -1.37559 | 2.76966  | H | -0.3881  | 5.63194  | 0.27236  |
| C  | -4.22853 | -0.40387 | -1.29659 | H | 2.1203   | 1.59325  | 0.20774  |
| C  | -5.02653 | 0.90955  | -1.5376  | H | 0.31674  | 1.72443  | 1.66434  |
| O  | -4.1598  | -1.306   | -2.09463 | H | 2.95733  | 3.60457  | -1.05646 |
| O  | -5.56246 | 1.27401  | -2.55403 |   |          |          |          |
| N  | -5.03012 | 1.57044  | -0.31897 |   |          |          |          |
| C  | -5.63048 | 2.86169  | -0.11142 |   |          |          |          |
| H  | -6.4313  | 2.81327  | 0.63851  |   |          |          |          |
| H  | -4.87802 | 3.59341  | 0.21582  |   |          |          |          |
| H  | -6.05265 | 3.18182  | -1.06869 |   |          |          |          |
| C  | -2.23019 | -2.27956 | 0.18405  |   |          |          |          |
| C  | -2.95736 | -3.46387 | 0.0181   |   |          |          |          |
| C  | -2.33413 | -4.5135  | -0.64981 |   |          |          |          |
| C  | -0.39566 | -3.15543 | -0.9232  |   |          |          |          |
| C  | -1.04854 | -4.35761 | -1.13986 |   |          |          |          |
| H  | -2.87461 | -5.44878 | -0.79625 |   |          |          |          |
| H  | 0.61967  | -2.98625 | -1.26498 |   |          |          |          |
| H  | -0.54593 | -5.15406 | -1.68252 |   |          |          |          |
| C  | -4.37064 | -3.58646 | 0.49808  |   |          |          |          |
| H  | -4.50488 | -3.17328 | 1.50564  |   |          |          |          |
| H  | -5.05195 | -3.04609 | -0.1742  |   |          |          |          |
| H  | -4.68552 | -4.63648 | 0.51494  |   |          |          |          |
| N  | -0.96619 | -2.14388 | -0.2578  |   |          |          |          |
| C  | 1.204    | 4.7453   | -0.70759 |   |          |          |          |
| C  | -0.07982 | 4.77511  | -0.3335  |   |          |          |          |
| C  | 1.15413  | 1.7435   | -0.26798 |   |          |          |          |
| C  | -1.16419 | 3.77427  | -0.62239 |   |          |          |          |
| C  | 0.07673  | 1.8637   | 0.60367  |   |          |          |          |
|    |          |          |          | C | -3.09563 | -1.93644 | 0.554    |
|    |          |          |          | C | -2.35554 | -3.06448 | 0.94813  |
|    |          |          |          | C | -2.67532 | -4.32932 | 0.49125  |
|    |          |          |          | C | -3.73643 | -4.44709 | -0.40753 |
|    |          |          |          | C | -4.47333 | -3.33959 | -0.81117 |
|    |          |          |          | C | -4.1768  | -2.06402 | -0.31843 |
|    |          |          |          | H | -2.09619 | -5.19931 | 0.79254  |
|    |          |          |          | H | -3.99079 | -5.42972 | -0.80103 |
|    |          |          |          | H | -5.29625 | -3.45161 | -1.51489 |
|    |          |          |          | C | -2.47412 | -0.73393 | 1.12739  |
|    |          |          |          | C | -1.05278 | -1.39631 | 1.91383  |
|    |          |          |          | O | -2.99526 | 0.24046  | 1.63764  |
|    |          |          |          | O | -0.38591 | -0.85224 | 2.76838  |
|    |          |          |          | N | -1.33845 | -2.74567 | 1.84994  |
|    |          |          |          | C | -0.44583 | -3.72714 | 2.41824  |
|    |          |          |          | H | -1.01468 | -4.5025  | 2.94695  |
|    |          |          |          | H | 0.16838  | -4.17551 | 1.62389  |
|    |          |          |          | H | 0.20595  | -3.21128 | 3.12898  |
|    |          |          |          | C | -5.02292 | -0.91844 | -0.75013 |
|    |          |          |          | C | -5.90653 | -0.28822 | 0.1459   |
|    |          |          |          | C | -6.70288 | 0.7314   | -0.37143 |

**95**

**MeTS<sub>A1-B</sub>(13)**

|    |          |          |          |   |          |          |          |
|----|----------|----------|----------|---|----------|----------|----------|
| C  | -5.72337 | 0.37501  | -2.51215 | H | -1.25846 | 4.92131  | 2.06345  |
| C  | -6.61782 | 1.07771  | -1.71371 | H | -0.54887 | 5.53772  | 0.56572  |
| H  | -7.40613 | 1.24178  | 0.2876   | H | -2.24573 | 5.87775  | 0.93781  |
| H  | -5.63096 | 0.59867  | -3.5771  | N | -1.51352 | 1.5367   | -0.1999  |
| H  | -7.24263 | 1.8626   | -2.13574 | C | 3.4633   | -1.6477  | -0.454   |
| C  | -6.02236 | -0.71    | 1.57724  | C | 3.87283  | -2.51948 | 0.56763  |
| H  | -6.12015 | -1.79997 | 1.6671   | C | 3.56688  | -2.27962 | 1.89637  |
| H  | -5.12919 | -0.41153 | 2.14166  | C | 2.80159  | -1.14795 | 2.17725  |
| H  | -6.89802 | -0.24899 | 2.0503   | C | 2.3524   | -0.29558 | 1.17088  |
| N  | -4.9427  | -0.60034 | -2.04824 | C | 2.66982  | -0.53551 | -0.16585 |
| Rh | -0.57739 | -0.39234 | -0.09716 | H | 3.89079  | -2.95403 | 2.68706  |
| Cl | 0.28063  | -2.53657 | -0.70519 | H | 2.51095  | -0.93568 | 3.20565  |
| C  | 1.23722  | 3.07899  | 0.9506   | H | 1.70386  | 0.5345   | 1.4296   |
| C  | 2.34747  | 3.01369  | 1.80671  | C | 3.88789  | -2.24396 | -1.72353 |
| C  | 2.22452  | 2.55342  | 3.10642  | C | 4.61314  | -3.56318 | -1.33291 |
| C  | 0.96318  | 2.10505  | 3.5111   | O | 3.77644  | -1.86084 | -2.86453 |
| C  | -0.1395  | 2.11745  | 2.6581   | O | 5.12779  | -4.36589 | -2.07245 |
| C  | -0.01007 | 2.60951  | 1.35897  | N | 4.57124  | -3.61534 | 0.04713  |
| H  | 3.07769  | 2.5083   | 3.78064  | C | 5.09082  | -4.7102  | 0.82239  |
| H  | 0.84255  | 1.70192  | 4.51528  | H | 5.85106  | -4.36475 | 1.53584  |
| H  | -1.09255 | 1.69937  | 2.97554  | H | 4.2877   | -5.21831 | 1.37364  |
| C  | 1.69916  | 3.61979  | -0.32717 | H | 5.54836  | -5.41595 | 0.12238  |
| C  | 3.23726  | 3.77303  | -0.16519 | C | 2.16642  | 0.33608  | -1.26048 |
| O  | 1.09062  | 3.93568  | -1.32456 | C | 3.06872  | 1.0714   | -2.0463  |
| O  | 4.03139  | 4.11746  | -1.00856 | C | 2.55925  | 1.80114  | -3.11767 |
| N  | 3.51114  | 3.42991  | 1.14525  | C | 0.37538  | 1.04732  | -2.55386 |
| C  | 4.8418   | 3.33254  | 1.68928  | C | 1.20668  | 1.76015  | -3.40118 |
| H  | 4.97233  | 4.00893  | 2.54376  | H | 3.23794  | 2.40069  | -3.72299 |
| H  | 5.05091  | 2.30206  | 2.01004  | H | -0.69812 | 1.01904  | -2.71952 |
| H  | 5.54153  | 3.61524  | 0.8968   | H | 0.78279  | 2.3018   | -4.24209 |
| C  | -1.1745  | 2.66435  | 0.4419   | C | 4.54399  | 1.07841  | -1.78501 |
| C  | -1.87703 | 3.86843  | 0.2791   | H | 4.78217  | 0.95192  | -0.72151 |
| C  | -2.95989 | 3.86912  | -0.5914  | H | 5.02863  | 0.26     | -2.33433 |
| C  | -2.5594  | 1.56556  | -1.04521 | H | 4.98186  | 2.02531  | -2.12076 |
| C  | -3.30416 | 2.70838  | -1.26986 | N | 0.82945  | 0.37912  | -1.48534 |
| H  | -3.52913 | 4.78731  | -0.73626 |   |          |          |          |
| H  | -2.80816 | 0.62457  | -1.53935 |   |          |          |          |
| H  | -4.14989 | 2.67277  | -1.95257 |   |          |          |          |
| C  | -1.46326 | 5.11276  | 1.00264  | C | -2.27531 | 1.14002  | -0.36342 |

**64**

**Me<sup>e</sup>TS<sub>A1-B</sub>(14)**

|    |          |          |          |                                |          |          |          |
|----|----------|----------|----------|--------------------------------|----------|----------|----------|
| C  | -2.26079 | 2.44086  | 0.1555   | H                              | 4.37608  | 1.20513  | 3.11873  |
| C  | -3.25487 | 2.88529  | 1.00975  | H                              | 4.60589  | 1.17366  | 0.66278  |
| C  | -4.25719 | 1.98303  | 1.36272  | C                              | 1.09877  | -2.06303 | 0.561    |
| C  | -4.27818 | 0.68772  | 0.85902  | C                              | 0.30845  | -2.48261 | 1.82821  |
| C  | -3.2859  | 0.24216  | -0.02177 | O                              | 1.09582  | -2.68724 | -0.47443 |
| H  | -3.24153 | 3.89442  | 1.41491  | O                              | -0.53064 | -3.34384 | 1.91925  |
| H  | -5.03627 | 2.30017  | 2.0539   | N                              | 0.82602  | -1.72382 | 2.86508  |
| H  | -5.06069 | -0.00168 | 1.1706   | C                              | 0.31506  | -1.75463 | 4.2127   |
| C  | -1.13126 | 0.94023  | -1.26058 | H                              | 1.08185  | -2.09777 | 4.91989  |
| C  | -0.25106 | 2.50461  | -1.0194  | H                              | -0.03344 | -0.7541  | 4.49819  |
| O  | -1.08285 | 0.39788  | -2.33612 | H                              | -0.52425 | -2.45558 | 4.22595  |
| O  | 0.63328  | 2.96975  | -1.7058  | C                              | 3.07895  | -0.25034 | -1.1224  |
| N  | -1.19291 | 3.20853  | -0.31365 | C                              | 4.1974   | -0.61595 | -1.86457 |
| C  | -0.97546 | 4.58106  | 0.07875  | C                              | 4.05027  | -0.57945 | -3.25474 |
| H  | -1.8503  | 5.19582  | -0.1675  | C                              | 1.78804  | 0.1727   | -3.01125 |
| H  | -0.77388 | 4.63228  | 1.1582   | C                              | 2.85219  | -0.18555 | -3.83068 |
| H  | -0.1081  | 4.9526   | -0.47293 | H                              | 4.89111  | -0.87275 | -3.88373 |
| C  | -3.26587 | -1.14921 | -0.53053 | H                              | 0.81955  | 0.49114  | -3.3857  |
| C  | -4.40006 | -1.73908 | -1.11665 | H                              | 2.73176  | -0.15901 | -4.9107  |
| C  | -4.26557 | -3.05833 | -1.54799 | C                              | 5.48453  | -1.03976 | -1.22662 |
| C  | -1.99949 | -3.04436 | -0.81335 | H                              | 6.17303  | -0.19223 | -1.10227 |
| C  | -3.06401 | -3.72882 | -1.39133 | H                              | 5.32601  | -1.47901 | -0.235   |
| H  | -5.11647 | -3.55036 | -2.02181 | H                              | 5.99734  | -1.78341 | -1.84862 |
| H  | -1.02958 | -3.52097 | -0.67201 | N                              | 1.91938  | 0.13192  | -1.68736 |
| H  | -2.94374 | -4.75861 | -1.72071 |                                |          |          |          |
| C  | -5.69873 | -1.01812 | -1.33613 | <b>77</b>                      |          |          |          |
| H  | -6.36931 | -1.09346 | -0.46825 | <b>MeTS<sub>A1-B</sub>(15)</b> |          |          |          |
| H  | -5.55063 | 0.04987  | -1.53443 | C                              | -1.61323 | 0.74347  | -1.34641 |
| H  | -6.23356 | -1.45152 | -2.19065 | C                              | -1.24729 | 2.08802  | -1.48797 |
| N  | -2.09372 | -1.78466 | -0.39691 | C                              | -2.17615 | 3.10811  | -1.35409 |
| Rh | 0.80363  | 0.75088  | -0.05152 | C                              | -3.49279 | 2.74611  | -1.06482 |
| Cl | -0.03776 | 1.49412  | 2.05638  | C                              | -3.86517 | 1.41452  | -0.91442 |
| C  | 1.91935  | -0.9138  | 0.99955  | C                              | -2.92867 | 0.38072  | -1.05542 |
| C  | 1.82663  | -0.8751  | 2.42313  | H                              | -1.88829 | 4.1506   | -1.47393 |
| C  | 2.69614  | -0.13203 | 3.18935  | H                              | -4.24321 | 3.52551  | -0.94244 |
| C  | 3.69264  | 0.59862  | 2.52692  | H                              | -4.89087 | 1.17386  | -0.6413  |
| C  | 3.83284  | 0.581    | 1.1487   | C                              | -0.4451  | -0.10569 | -1.63707 |
| C  | 2.95622  | -0.18186 | 0.35364  | C                              | 0.82128  | 1.07119  | -1.83806 |
| H  | 2.60899  | -0.10185 | 4.27273  | O                              | -0.40204 | -1.13914 | -2.25885 |

|    |          |          |          |                                            |          |          |          |
|----|----------|----------|----------|--------------------------------------------|----------|----------|----------|
| O  | 1.8943   | 0.92794  | -2.38639 | H                                          | 4.83328  | -4.82138 | -1.89587 |
| N  | 0.09665  | 2.24695  | -1.82531 | H                                          | 1.11551  | -4.45152 | 0.46479  |
| C  | 0.6451   | 3.48889  | -2.32438 | C                                          | 1.4248   | 5.40126  | 1.04453  |
| H  | 0.05311  | 3.85264  | -3.17485 | C                                          | 0.75917  | 4.18992  | 1.17827  |
| H  | 0.66069  | 4.24942  | -1.53171 | C                                          | 1.42374  | 2.98359  | 0.90381  |
| H  | 1.66901  | 3.29025  | -2.65122 | C                                          | 2.76301  | 3.0169   | 0.49414  |
| C  | -3.2715  | -1.0418  | -0.81475 | C                                          | 3.42102  | 4.23313  | 0.36218  |
| C  | -4.44364 | -1.64894 | -1.30178 | C                                          | 2.75626  | 5.42675  | 0.63274  |
| C  | -4.63382 | -2.99223 | -0.97256 | H                                          | 0.90344  | 6.33164  | 1.26536  |
| C  | -2.56991 | -2.98012 | 0.20516  | H                                          | -0.28196 | 4.15721  | 1.5009   |
| C  | -3.70455 | -3.67362 | -0.20292 | H                                          | 3.27306  | 2.07535  | 0.28947  |
| H  | -5.52326 | -3.50433 | -1.34197 | H                                          | 4.46304  | 4.24869  | 0.0474   |
| H  | -1.79533 | -3.46535 | 0.80513  | H                                          | 3.27535  | 6.37794  | 0.52701  |
| H  | -3.84586 | -4.71956 | 0.06027  | C                                          | 0.70829  | 1.74599  | 1.02359  |
| C  | -5.44904 | -0.95853 | -2.17639 | C                                          | -0.18604 | 0.96789  | 1.43669  |
| H  | -6.22881 | -0.44993 | -1.59174 | C                                          | -1.30259 | 0.39779  | 2.12916  |
| H  | -4.98634 | -0.20495 | -2.82369 | C                                          | -1.20504 | -0.82961 | 2.79992  |
| H  | -5.95854 | -1.68831 | -2.81778 | C                                          | -2.52333 | 1.08679  | 2.12764  |
| N  | -2.35702 | -1.70812 | -0.09853 | C                                          | -2.31173 | -1.3515  | 3.45242  |
| C  | 1.46817  | -2.58667 | -0.41097 | H                                          | -0.24798 | -1.34976 | 2.79801  |
| C  | 2.35653  | -1.78612 | -1.07387 | C                                          | -3.62991 | 0.54979  | 2.77271  |
| C  | 3.80046  | -4.63438 | -0.11618 | H                                          | -2.59548 | 2.03749  | 1.59915  |
| C  | 3.83023  | -1.60834 | -0.83582 | C                                          | -3.5284  | -0.67115 | 3.43314  |
| C  | 4.42122  | -4.10788 | -1.1765  | H                                          | -2.22809 | -2.30295 | 3.97584  |
| C  | 4.65637  | -2.67635 | -1.55828 | H                                          | -4.57639 | 1.08924  | 2.75931  |
| H  | 4.11628  | -0.62444 | -1.23792 | H                                          | -4.39685 | -1.09255 | 3.93723  |
| H  | 4.06752  | -1.57592 | 0.2312   |                                            |          |          |          |
| H  | 4.47394  | -2.58483 | -2.64233 |                                            |          |          |          |
| H  | 5.72713  | -2.44146 | -1.43308 |                                            |          |          |          |
| C  | 1.68231  | -3.54087 | 0.7259   | <b>81</b>                                  |          |          |          |
| H  | 1.20641  | -3.14588 | 1.63649  | <b>Me<sup>e</sup>TS<sub>A1-B(16)</sub></b> |          |          |          |
| C  | 3.12705  | -3.94067 | 1.03627  | C                                          | 1.16592  | -1.38897 | -1.36174 |
| H  | 3.68485  | -3.06343 | 1.37717  | C                                          | 0.20578  | -2.38622 | -1.57597 |
| H  | 3.10282  | -4.62719 | 1.89449  | C                                          | 0.54041  | -3.73116 | -1.56643 |
| Rh | 1.16585  | -0.12802 | 0.13367  | C                                          | 1.87741  | -4.06051 | -1.33782 |
| Cl | 2.29595  | -0.61364 | 2.1207   | C                                          | 2.84185  | -3.07948 | -1.13997 |
| H  | 0.47656  | -2.65563 | -0.86381 | C                                          | 2.50571  | -1.71878 | -1.15549 |
| H  | 2.00684  | -1.39194 | -2.03058 | H                                          | -0.21273 | -4.49921 | -1.73274 |
| H  | 3.74612  | -5.7262  | -0.08685 | H                                          | 2.16924  | -5.10914 | -1.31033 |
|    |          |          |          | H                                          | 3.86839  | -3.37217 | -0.92924 |

|    |          |          |          |                                |          |          |          |
|----|----------|----------|----------|--------------------------------|----------|----------|----------|
| C  | 0.52979  | -0.06162 | -1.49474 | C                              | 1.61745  | -2.83027 | 2.08518  |
| C  | -1.13287 | -0.49126 | -1.75508 | C                              | 3.0758   | -0.78665 | 3.2802   |
| O  | 0.95505  | 0.93315  | -2.03073 | H                              | 1.46089  | 0.51636  | 2.67281  |
| O  | -1.99461 | 0.19667  | -2.25277 | C                              | 2.8454   | -3.1071  | 2.67055  |
| N  | -1.06065 | -1.86511 | -1.84935 | H                              | 1.04629  | -3.61843 | 1.59404  |
| C  | -2.13333 | -2.64763 | -2.42256 | C                              | 3.57857  | -2.08496 | 3.26759  |
| H  | -1.7833  | -3.18256 | -3.31554 | H                              | 3.64685  | 0.01527  | 3.74593  |
| H  | -2.52209 | -3.36734 | -1.68829 | H                              | 3.23197  | -4.1253  | 2.65915  |
| H  | -2.93388 | -1.95735 | -2.70141 | H                              | 4.54239  | -2.30108 | 3.7263   |
| C  | 3.50374  | -0.65285 | -0.90103 | C                              | -5.24274 | 2.31378  | -1.69586 |
| C  | 4.76943  | -0.6241  | -1.5154  | C                              | -3.8571  | 2.38209  | -1.67021 |
| C  | 5.59596  | 0.45312  | -1.19088 | C                              | -3.18351 | 2.46821  | -0.44324 |
| C  | 3.89793  | 1.30212  | 0.24069  | C                              | -3.92025 | 2.49531  | 0.75212  |
| C  | 5.17276  | 1.42749  | -0.3018  | C                              | -5.30586 | 2.42162  | 0.71389  |
| H  | 6.57834  | 0.52426  | -1.66013 | C                              | -5.96983 | 2.32898  | -0.50754 |
| H  | 3.50957  | 2.04679  | 0.93932  | H                              | -5.75953 | 2.24386  | -2.65161 |
| H  | 5.80369  | 2.276    | -0.04396 | H                              | -3.27686 | 2.34966  | -2.58829 |
| C  | 5.24621  | -1.63788 | -2.5145  | H                              | -3.38416 | 2.54758  | 1.6985   |
| H  | 5.72639  | -2.50174 | -2.03309 | H                              | -5.87083 | 2.4363   | 1.64427  |
| H  | 4.42977  | -2.02594 | -3.13447 | H                              | -7.05701 | 2.27131  | -0.53429 |
| H  | 5.99331  | -1.19047 | -3.18184 | C                              | -1.75646 | 2.55561  | -0.39521 |
| N  | 3.0846   | 0.29945  | -0.05868 | C                              | -0.54975 | 2.77915  | -0.30793 |
| Rh | -0.7555  | 0.50313  | 0.36062  | C                              | 0.74396  | 3.38053  | -0.14671 |
| Cl | -1.09651 | 1.33988  | 2.52253  | C                              | 1.53349  | 3.71257  | -1.25579 |
| C  | -3.90191 | -4.11042 | 0.75915  | C                              | 1.1785   | 3.72726  | 1.14222  |
| C  | -2.69107 | -3.46433 | 0.96954  | C                              | 2.72597  | 4.40069  | -1.07626 |
| C  | -2.60393 | -2.06676 | 0.85199  | H                              | 1.19982  | 3.42113  | -2.24813 |
| C  | -3.75088 | -1.33444 | 0.51518  | C                              | 2.37089  | 4.42028  | 1.30864  |
| C  | -4.95591 | -1.99085 | 0.30067  | H                              | 0.56174  | 3.44885  | 1.99596  |
| C  | -5.03681 | -3.37628 | 0.41876  | C                              | 3.14444  | 4.76364  | 0.20178  |
| H  | -3.96123 | -5.19318 | 0.85961  | H                              | 3.33214  | 4.65896  | -1.94306 |
| H  | -1.79607 | -4.02913 | 1.23287  | H                              | 2.69363  | 4.70032  | 2.31033  |
| H  | -3.68522 | -0.24958 | 0.42556  | H                              | 4.07651  | 5.31144  | 0.33565  |
| H  | -5.84003 | -1.41104 | 0.03966  |                                |          |          |          |
| H  | -5.98474 | -3.88449 | 0.24961  |                                |          |          |          |
| C  | -1.33112 | -1.44248 | 1.05802  | <b>53</b>                      |          |          |          |
| C  | -0.14892 | -1.27941 | 1.44232  | <b>MeTS<sub>A1-B</sub>(17)</b> |          |          |          |
| C  | 1.11257  | -1.52132 | 2.0821   | C                              | 1.89746  | -0.24402 | -0.66882 |
| C  | 1.85627  | -0.49802 | 2.68496  | C                              | 2.70712  | -1.34515 | -0.33516 |
|    |          |          |          | C                              | 3.95893  | -1.15497 | 0.22734  |

|   |          |          |          |             |          |          |          |
|---|----------|----------|----------|-------------|----------|----------|----------|
| C | 4.33032  | 0.14905  | 0.55015  | H           | -2.74968 | 1.28908  | -0.7774  |
| C | 3.47482  | 1.23258  | 0.35894  | C           | -4.10975 | -0.02168 | -1.85751 |
| C | 2.226    | 1.05124  | -0.24008 | H           | -4.57599 | 0.83439  | -2.37459 |
| H | 4.60214  | -1.9959  | 0.47603  | H           | -3.9932  | -0.79082 | -2.63806 |
| H | 5.29334  | 0.31719  | 1.02857  | Rh          | -0.1464  | -0.46159 | 0.30224  |
| H | 3.75656  | 2.20815  | 0.74914  | Cl          | 0.80476  | -0.91705 | 2.57975  |
| C | 0.6753   | -0.69362 | -1.46389 | H           | -1.80339 | -1.58718 | -1.36335 |
| C | 0.72537  | -2.43759 | -0.86886 | H           | -1.95871 | -2.17778 | 0.89275  |
| O | 0.37096  | -0.50134 | -2.61881 | H           | -5.85452 | -1.18859 | -1.2553  |
| O | -0.03493 | -3.33965 | -1.10838 | H           | -5.87024 | -0.9344  | 1.04283  |
| N | 2.07231  | -2.55889 | -0.55818 | H           | -2.10369 | 0.64156  | -2.27487 |
| C | 2.67785  | -3.83969 | -0.26109 |             |          |          |          |
| H | 3.61963  | -3.95908 | -0.81019 | <b>64</b>   |          |          |          |
| H | 2.86277  | -3.92571 | 0.81843  | <b>MeB2</b> |          |          |          |
| H | 1.97376  | -4.61608 | -0.57115 | C           | 2.24462  | -0.05071 | -0.69768 |
| C | 1.17903  | 2.10035  | -0.16459 | C           | 2.75005  | 0.55676  | -1.8496  |
| C | 1.41257  | 3.45408  | -0.44434 | C           | 3.89686  | 0.04898  | -2.46383 |
| C | 0.38534  | 4.3576   | -0.171   | C           | 4.58721  | -1.00168 | -1.87098 |
| C | -0.98353 | 2.56188  | 0.57971  | C           | 4.20399  | -1.48261 | -0.62532 |
| C | -0.81079 | 3.92225  | 0.37542  | C           | 3.05097  | -0.98041 | -0.00884 |
| H | 0.53974  | 5.41455  | -0.38805 | H           | 4.27667  | 0.49604  | -3.38127 |
| H | -1.90651 | 2.16104  | 0.99485  | H           | 5.47855  | -1.39947 | -2.35199 |
| H | -1.60978 | 4.61548  | 0.62453  | H           | 4.83222  | -2.21956 | -0.13778 |
| C | 2.69445  | 3.95009  | -1.04529 | C           | 1.45599  | 2.24187  | 0.01144  |
| H | 3.38833  | 4.32252  | -0.2789  | C           | 1.56117  | 2.64835  | -1.47934 |
| H | 3.21478  | 3.16911  | -1.60961 | O           | 1.7832   | 2.99527  | 0.89019  |
| H | 2.49262  | 4.78585  | -1.72635 | O           | 1.04883  | 3.69122  | -1.84615 |
| N | -0.03164 | 1.67417  | 0.28915  | N           | 2.13245  | 1.73808  | -2.33705 |
| C | -2.02967 | -0.75545 | -0.68588 | C           | 2.27077  | 2.12035  | -3.73017 |
| C | -2.13831 | -1.11979 | 0.67955  | H           | 1.52345  | 2.88918  | -3.94387 |
| C | -5.0625  | -0.56697 | -0.82987 | H           | 3.26557  | 2.53541  | -3.94373 |
| C | -2.87455 | -0.38155 | 1.77264  | H           | 2.10743  | 1.24455  | -4.3704  |
| C | -5.08264 | -0.40921 | 0.49715  | C           | 2.6546   | -1.15747 | 1.38982  |
| C | -4.13506 | 0.39064  | 1.34495  | C           | 3.14778  | -2.07688 | 2.33263  |
| H | -3.15965 | -1.12758 | 2.52782  | C           | 2.67914  | -1.98061 | 3.64028  |
| H | -2.18836 | 0.29477  | 2.30944  | C           | 1.2661   | -0.18092 | 3.02228  |
| H | -4.65274 | 0.70904  | 2.26118  | C           | 1.74897  | -1.02071 | 4.00774  |
| H | -3.86413 | 1.3219   | 0.8297   | H           | 3.04722  | -2.69155 | 4.37992  |
| C | -2.70425 | 0.38339  | -1.39001 | H           | 0.48014  | 0.54337  | 3.21653  |

|    |          |          |          |
|----|----------|----------|----------|
| H  | 1.37279  | -0.94582 | 5.02394  |
| C  | 4.10669  | -3.17593 | 1.99021  |
| H  | 3.80496  | -3.70916 | 1.08032  |
| H  | 5.12989  | -2.80459 | 1.83914  |
| H  | 4.14586  | -3.90761 | 2.80533  |
| N  | 1.71299  | -0.24656 | 1.76943  |
| Rh | 0.57812  | 0.50855  | 0.23827  |
| Cl | -0.44057 | -1.90419 | 0.53679  |
| C  | -2.79596 | -0.54452 | -0.85034 |
| C  | -2.33733 | -1.38768 | -1.8885  |
| C  | -1.3528  | -0.98915 | -2.7819  |
| C  | -0.77106 | 0.25203  | -2.56915 |
| C  | -1.13471 | 1.07412  | -1.48705 |
| C  | -2.18421 | 0.6688   | -0.61847 |
| H  | -1.00719 | -1.64676 | -3.57552 |
| H  | 0.0019   | 0.60457  | -3.24952 |
| H  | -0.81441 | 2.11595  | -1.46765 |
| C  | -3.69012 | -1.34609 | -0.00762 |
| C  | -3.71809 | -2.74417 | -0.67384 |
| O  | -4.31692 | -1.05676 | 0.98355  |
| O  | -4.3028  | -3.72765 | -0.30247 |
| N  | -2.93719 | -2.63044 | -1.82345 |
| C  | -2.47415 | -3.78247 | -2.56021 |
| H  | -2.6367  | -3.65194 | -3.63676 |
| H  | -1.40581 | -3.94688 | -2.36045 |
| H  | -3.04722 | -4.64586 | -2.21127 |
| C  | -2.36148 | 1.4644   | 0.61507  |
| C  | -3.5452  | 2.08424  | 1.02922  |
| C  | -3.46274 | 2.87622  | 2.17467  |
| C  | -1.13542 | 2.3864   | 2.3473   |
| C  | -2.25588 | 3.04102  | 2.83884  |
| H  | -4.35873 | 3.38573  | 2.5292   |
| H  | -0.14815 | 2.52021  | 2.79125  |
| H  | -2.17676 | 3.68199  | 3.71322  |
| C  | -4.83319 | 1.93092  | 0.2862   |
| H  | -4.67753 | 1.90168  | -0.79944 |
| H  | -5.32225 | 0.99062  | 0.57472  |
| H  | -5.51631 | 2.75831  | 0.51065  |
| N  | -1.19614 | 1.59842  | 1.27392  |

## 64

### MeTS<sub>B2-B3</sub>

|    |          |          |          |
|----|----------|----------|----------|
| C  | -2.50001 | 0.70611  | 0.25263  |
| C  | -2.81449 | 2.0561   | 0.14128  |
| C  | -3.96159 | 2.54922  | 0.75855  |
| C  | -4.79787 | 1.66421  | 1.43575  |
| C  | -4.5274  | 0.30245  | 1.47884  |
| C  | -3.36381 | -0.20242 | 0.87732  |
| H  | -4.21979 | 3.60549  | 0.70468  |
| H  | -5.69923 | 2.04425  | 1.91214  |
| H  | -5.2411  | -0.34766 | 1.97158  |
| C  | -1.57447 | 0.78698  | -2.15442 |
| C  | -1.19735 | 2.37069  | -1.66292 |
| O  | -2.02713 | 0.63477  | -3.23725 |
| O  | -0.4495  | 3.01876  | -2.36107 |
| N  | -1.95593 | 2.87323  | -0.63855 |
| C  | -1.9409  | 4.31273  | -0.42822 |
| H  | -1.05901 | 4.72086  | -0.92606 |
| H  | -2.83557 | 4.78677  | -0.8535  |
| H  | -1.89463 | 4.52014  | 0.64637  |
| C  | -2.91494 | -1.59236 | 0.76929  |
| C  | -3.45054 | -2.72542 | 1.41287  |
| C  | -2.83649 | -3.95466 | 1.19048  |
| C  | -1.22983 | -2.91536 | -0.21038 |
| C  | -1.71769 | -4.06541 | 0.37968  |
| H  | -3.23828 | -4.83773 | 1.68678  |
| H  | -0.32954 | -2.92287 | -0.81961 |
| H  | -1.21532 | -5.01578 | 0.22321  |
| C  | -4.61766 | -2.66878 | 2.35102  |
| H  | -4.45685 | -1.94369 | 3.15906  |
| H  | -5.5506  | -2.39771 | 1.83869  |
| H  | -4.77534 | -3.64905 | 2.8151   |
| N  | -1.8263  | -1.73301 | -0.04588 |
| Rh | -0.86926 | 0.03395  | -0.58153 |
| Cl | 0.20647  | -0.1992  | 1.69551  |
| C  | 3.08043  | 0.33297  | 0.53729  |
| C  | 3.19636  | 1.37637  | 1.46643  |
| C  | 2.81195  | 2.66951  | 1.15136  |



|             |          |          |          |    |          |          |          |
|-------------|----------|----------|----------|----|----------|----------|----------|
| C           | 2.26086  | 2.88327  | -0.11271 | H  | 5.31862  | 1.49152  | 0.8531   |
| C           | 2.09679  | 1.84673  | -1.03019 | C  | 1.75241  | -1.52942 | -1.93632 |
| C           | 2.49847  | 0.54873  | -0.70365 | C  | 0.90816  | -2.50182 | 0.42082  |
| H           | 2.89975  | 3.48131  | 1.87035  | O  | 2.32018  | -2.05943 | -2.78513 |
| H           | 1.93595  | 3.88494  | -0.39151 | O  | 0.02603  | -3.32517 | 0.39623  |
| H           | 1.63055  | 2.04467  | -1.99396 | N  | 2.11454  | -2.68788 | 1.0953   |
| C           | 3.47378  | -0.90416 | 1.21168  | C  | 2.35905  | -3.89412 | 1.85656  |
| C           | 3.82337  | -0.47552 | 2.66351  | H  | 1.48681  | -4.5416  | 1.7443   |
| O           | 3.57665  | -2.03373 | 0.79111  | H  | 3.25033  | -4.41715 | 1.48346  |
| O           | 4.18343  | -1.18105 | 3.57313  | H  | 2.5026   | -3.65958 | 2.92007  |
| N           | 3.67358  | 0.90129  | 2.69005  | C  | 2.70622  | 1.7948   | -0.39738 |
| C           | 3.76616  | 1.68524  | 3.89401  | C  | 3.13646  | 3.13866  | -0.41636 |
| H           | 4.50268  | 2.49207  | 3.78459  | C  | 2.28654  | 4.08169  | -0.9958  |
| H           | 2.78901  | 2.11689  | 4.1502   | C  | 0.71042  | 2.38635  | -1.48853 |
| H           | 4.08544  | 1.01354  | 4.69634  | C  | 1.05862  | 3.72698  | -1.52833 |
| C           | 2.20621  | -0.54879 | -1.65477 | H  | 2.59923  | 5.12616  | -1.00294 |
| C           | 3.22037  | -1.20756 | -2.36816 | H  | -0.25212 | 2.03414  | -1.86151 |
| C           | 2.82773  | -2.13308 | -3.3294  | H  | 0.37834  | 4.464    | -1.9461  |
| C           | 0.55089  | -1.68599 | -2.80525 | C  | 4.4234   | 3.62626  | 0.17878  |
| C           | 1.48045  | -2.37327 | -3.56522 | H  | 4.49414  | 3.3903   | 1.24847  |
| H           | 3.59055  | -2.65485 | -3.90743 | H  | 5.30331  | 3.19342  | -0.31538 |
| H           | -0.52047 | -1.82349 | -2.95661 | H  | 4.49695  | 4.71523  | 0.07659  |
| H           | 1.15296  | -3.07283 | -4.33022 | N  | 1.51409  | 1.46662  | -0.96405 |
| C           | 4.66712  | -0.92986 | -2.11299 | Rh | 0.90128  | -0.68119 | -0.50207 |
| H           | 4.85752  | 0.13964  | -1.96282 | Cl | 0.05194  | 0.25308  | 1.54251  |
| H           | 4.99491  | -1.45525 | -1.20635 | C  | -2.94675 | 0.20671  | 0.69243  |
| H           | 5.28649  | -1.277   | -2.94816 | C  | -3.22799 | 0.12629  | 2.06178  |
| N           | 0.90205  | -0.80661 | -1.85525 | C  | -3.35109 | -1.09907 | 2.69302  |
|             |          |          |          | C  | -3.14086 | -2.24285 | 1.91885  |
|             |          |          |          | C  | -2.83171 | -2.17663 | 0.56074  |
|             |          |          |          | C  | -2.72093 | -0.93578 | -0.06308 |
|             |          |          |          | H  | -3.56707 | -1.17576 | 3.75682  |
|             |          |          |          | H  | -3.20809 | -3.21956 | 2.39498  |
|             |          |          |          | H  | -2.62393 | -3.08431 | -0.00101 |
|             |          |          |          | C  | -2.791   | 1.61744  | 0.35073  |
|             |          |          |          | C  | -3.00975 | 2.37752  | 1.69095  |
|             |          |          |          | O  | -2.55616 | 2.15614  | -0.70866 |
|             |          |          |          | O  | -2.95323 | 3.56875  | 1.87633  |
|             |          |          |          | N  | -3.30181 | 1.4029   | 2.62875  |
| <b>64</b>   |          |          |          |    |          |          |          |
| <b>MeB3</b> |          |          |          |    |          |          |          |
| C           | 2.64445  | -0.51559 | 0.36281  | H  | -3.56707 | -1.17576 | 3.75682  |
| C           | 3.04086  | -1.63856 | 1.0772   | H  | -3.20809 | -3.21956 | 2.39498  |
| C           | 4.28364  | -1.63278 | 1.70272  | H  | -2.62393 | -3.08431 | -0.00101 |
| C           | 5.07691  | -0.48916 | 1.584    | C  | -2.791   | 1.61744  | 0.35073  |
| C           | 4.6504   | 0.63999  | 0.8968   | C  | -3.00975 | 2.37752  | 1.69095  |
| C           | 3.38397  | 0.6607   | 0.27496  | O  | -2.55616 | 2.15614  | -0.70866 |
| H           | 4.63718  | -2.49125 | 2.2717   | O  | -2.95323 | 3.56875  | 1.87633  |
| H           | 6.05866  | -0.47837 | 2.05429  | N  | -3.30181 | 1.4029   | 2.62875  |

|   |          |          |          |    |          |          |          |
|---|----------|----------|----------|----|----------|----------|----------|
| C | -3.43782 | 1.66658  | 4.03738  | C  | -2.63314 | 0.1403   | 2.28936  |
| H | -4.40442 | 1.30882  | 4.41597  | C  | -3.90556 | 0.66003  | 2.44112  |
| H | -2.62804 | 1.18208  | 4.59993  | H  | -5.65873 | 1.28878  | 1.36845  |
| H | -3.37599 | 2.75012  | 4.1749   | H  | -1.9792  | -0.03395 | 3.14103  |
| C | -2.40642 | -0.778   | -1.50401 | H  | -4.28478 | 0.91306  | 3.42734  |
| C | -3.46955 | -0.70099 | -2.42046 | C  | -5.05961 | 0.72661  | -1.15534 |
| C | -3.1582  | -0.46417 | -3.75287 | H  | -5.94206 | 1.31072  | -0.86928 |
| C | -0.85652 | -0.40298 | -3.15823 | H  | -4.53805 | 1.27649  | -1.94879 |
| C | -1.83335 | -0.30236 | -4.13222 | H  | -5.42053 | -0.21666 | -1.58718 |
| H | -3.95951 | -0.39131 | -4.48831 | N  | -2.13555 | -0.16593 | 1.09024  |
| H | 0.19263  | -0.27393 | -3.42283 | Rh | -0.09833 | -0.76399 | 0.79683  |
| H | -1.55658 | -0.1015  | -5.1642  | Cl | -0.83616 | -3.02791 | 1.4425   |
| C | -4.89174 | -0.81789 | -1.96637 | C  | 0.66397  | 0.92028  | -0.07799 |
| H | -5.05074 | -1.7032  | -1.33841 | C  | 1.74095  | 0.18638  | -0.17654 |
| H | -5.18266 | 0.05487  | -1.36505 | C  | 0.19733  | 2.24379  | -0.3908  |
| H | -5.57234 | -0.87507 | -2.8238  | C  | -0.87843 | 2.82716  | 0.29569  |
| N | -1.12101 | -0.64398 | -1.86405 | C  | 0.84156  | 2.98191  | -1.39969 |

## 57

### Me<sup>c</sup>TS<sub>C2-D</sub>(1)

|   |          |          |          |   |          |          |          |
|---|----------|----------|----------|---|----------|----------|----------|
| C | -0.88451 | -0.97391 | -0.99688 | H | 1.67066  | 2.52227  | -1.93629 |
| C | -0.10403 | -1.58459 | -1.97153 | C | -0.64059 | 4.84019  | -1.00877 |
| C | -0.62437 | -1.77098 | -3.25131 | H | -2.11912 | 4.56365  | 0.53409  |
| C | -1.92747 | -1.35046 | -3.51109 | H | 0.93012  | 4.82955  | -2.487   |
| C | -2.71647 | -0.75953 | -2.53103 | H | -0.96762 | 5.85017  | -1.2502  |
| C | -2.19871 | -0.56477 | -1.23812 | C | 3.15954  | 0.50713  | 0.01446  |
| H | -0.04042 | -2.25509 | -4.03254 | C | 3.49362  | 1.52357  | 0.91834  |
| H | -2.34439 | -1.50055 | -4.50528 | C | 4.1758   | -0.09846 | -0.73252 |
| H | -3.73214 | -0.48334 | -2.78895 | C | 4.81414  | 1.92931  | 1.06786  |
| C | 1.60905  | -1.67624 | -0.28384 | H | 2.7015   | 1.99071  | 1.50395  |
| O | 2.49558  | -2.25927 | 0.29377  | C | 5.49215  | 0.31274  | -0.58619 |
| N | 1.15336  | -2.02642 | -1.55637 | H | 3.92871  | -0.8953  | -1.43185 |
| C | 1.82278  | -3.10529 | -2.26037 | C | 5.81555  | 1.32461  | 0.3155   |
| H | 1.13254  | -3.9455  | -2.41117 | H | 5.06034  | 2.71629  | 1.77857  |
| H | 2.1947   | -2.76359 | -3.23606 | H | 6.27429  | -0.16295 | -1.17517 |
| H | 2.66107  | -3.43834 | -1.6445  | H | 6.85152  | 1.63768  | 0.43406  |
| C | -2.88579 | -0.05597 | -0.04256 | C | 0.67752  | -0.66086 | 2.70862  |
| C | -4.1819  | 0.49659  | 0.03684  | O | 1.06488  | -0.71969 | 3.78084  |
| C | -4.66098 | 0.85607  | 1.29394  |   |          |          |          |

86

MeTS<sub>C2-D</sub>(2)

|    |          |          |          |   |          |          |          |
|----|----------|----------|----------|---|----------|----------|----------|
|    |          |          |          | H | -3.32748 | 2.35832  | 0.20026  |
|    |          |          |          | C | -5.58295 | 0.33414  | -2.213   |
| C  | -1.82832 | -1.37235 | -0.59546 | H | -3.80016 | -0.80048 | -2.66284 |
| C  | -1.35122 | -2.15092 | -1.66971 | C | -6.12981 | 1.37249  | -1.45965 |
| C  | -2.1257  | -3.20274 | -2.15559 | H | -5.7473  | 2.91105  | 0.00096  |
| C  | -3.28644 | -3.54406 | -1.46284 | H | -6.21266 | -0.23551 | -2.89443 |
| C  | -3.68934 | -2.8675  | -0.31017 | H | -7.18856 | 1.61055  | -1.54912 |
| C  | -2.96455 | -1.76608 | 0.14965  | C | -0.1908  | 2.29871  | -1.52683 |
| H  | -1.7961  | -3.79971 | -3.00403 | C | -0.95856 | 3.4355   | -1.83126 |
| H  | -3.87248 | -4.3957  | -1.80445 | C | 1.20491  | 2.38186  | -1.60097 |
| H  | -4.54866 | -3.24318 | 0.23538  | C | -0.33765 | 4.62692  | -2.17964 |
| C  | 0.70529  | -1.03187 | -1.23678 | H | -2.04603 | 3.37526  | -1.78228 |
| O  | 1.88219  | -0.85367 | -1.46511 | C | 1.82026  | 3.57605  | -1.95245 |
| N  | -0.07854 | -1.82802 | -2.09643 | H | 1.81507  | 1.50824  | -1.38633 |
| C  | 0.5169   | -2.45639 | -3.2587  | C | 1.05329  | 4.70234  | -2.23537 |
| H  | 0.66348  | -3.53262 | -3.09032 | H | -0.94254 | 5.50316  | -2.40955 |
| H  | -0.12088 | -2.31276 | -4.13973 | H | 2.90724  | 3.61045  | -1.9978  |
| H  | 1.48835  | -1.98799 | -3.42921 | H | 1.5366   | 5.64062  | -2.50448 |
| C  | -3.23752 | -0.97572 | 1.36403  | C | 3.91454  | -0.41928 | 0.5308   |
| C  | -4.48373 | -0.89134 | 2.02336  | C | 4.47855  | -1.7013  | 0.46891  |
| C  | -4.54078 | -0.13831 | 3.19411  | C | 4.31357  | -2.61393 | 1.49605  |
| C  | -2.25334 | 0.43121  | 2.94524  | C | 3.52599  | -2.22196 | 2.57802  |
| C  | -3.4186  | 0.50662  | 3.69241  | C | 2.90777  | -0.97517 | 2.62406  |
| H  | -5.49479 | -0.05503 | 3.71591  | C | 3.0842   | -0.05888 | 1.58866  |
| H  | -1.34201 | 0.94444  | 3.2557   | H | 4.7539   | -3.60818 | 1.4548   |
| H  | -3.45254 | 1.08076  | 4.6151   | H | 3.35181  | -2.92705 | 3.38839  |
| C  | -5.75311 | -1.49541 | 1.50044  | H | 2.23651  | -0.73192 | 3.44483  |
| H  | -5.83132 | -1.39226 | 0.41023  | C | 4.29481  | 0.28241  | -0.69194 |
| H  | -5.84367 | -2.56355 | 1.74206  | C | 5.07695  | -0.76278 | -1.53451 |
| H  | -6.61828 | -0.99199 | 1.9491   | O | 4.14419  | 1.43761  | -1.02503 |
| N  | -2.17598 | -0.25709 | 1.81176  | O | 5.53583  | -0.61898 | -2.642   |
| Rh | -0.3693  | -0.37347 | 0.31082  | N | 5.17313  | -1.88391 | -0.73429 |
| Cl | 0.26401  | -2.36518 | 1.56791  | C | 5.79276  | -3.11338 | -1.15055 |
| C  | -1.98688 | 0.46508  | -1.11814 | H | 6.60057  | -3.40027 | -0.46416 |
| C  | -0.8562  | 1.08883  | -1.08607 | H | 5.05766  | -3.92846 | -1.19676 |
| C  | -3.41374 | 0.7574   | -1.23329 | H | 6.21101  | -2.9467  | -2.14794 |
| C  | -3.96971 | 1.80058  | -0.483   | C | 2.36719  | 1.24008  | 1.62794  |
| C  | -4.23606 | 0.02056  | -2.09403 | C | 3.06391  | 2.42712  | 1.91592  |
| C  | -5.32264 | 2.10385  | -0.59355 | C | 2.324    | 3.59893  | 2.02452  |

|   |          |         |         |    |          |          |          |
|---|----------|---------|---------|----|----------|----------|----------|
| C | 0.3518   | 2.35543 | 1.57095 | H  | -4.48331 | -0.09155 | -2.14868 |
| C | 0.94598  | 3.56879 | 1.8669  | H  | -5.22869 | -1.39259 | -1.20118 |
| H | 2.83652  | 4.5355  | 2.24538 | N  | -1.99096 | -0.00797 | 1.15428  |
| H | -0.72515 | 2.29128 | 1.40789 | Rh | 0.09385  | -0.51823 | 1.06877  |
| H | 0.34159  | 4.46839 | 1.95471 | Cl | 0.77974  | 1.1807   | 2.78507  |
| C | 4.54903  | 2.43671 | 2.0974  | C  | 0.51803  | 0.78279  | -0.46288 |
| H | 4.88827  | 1.60518 | 2.72757 | C  | 1.71082  | 0.27976  | -0.39819 |
| H | 5.05     | 2.34095 | 1.12503 | C  | -0.37004 | 1.74644  | -1.05587 |
| H | 4.88126  | 3.37545 | 2.55619 | C  | -0.84365 | 2.82326  | -0.29093 |
| N | 1.03557  | 1.20824 | 1.43815 | C  | -0.84728 | 1.55426  | -2.35959 |

## 57

### MeTSCl-D1(1)

|   |          |          |          |   |          |          |          |
|---|----------|----------|----------|---|----------|----------|----------|
| C | -0.66326 | -1.52912 | -0.45472 | H | -0.49357 | 0.6971   | -2.93314 |
| C | 0.20174  | -2.28555 | -1.24097 | C | -2.24385 | 3.50662  | -2.13364 |
| C | -0.28335 | -2.94319 | -2.37154 | H | -2.1231  | 4.54493  | -0.2474  |
| C | -1.63416 | -2.81553 | -2.68796 | H | -2.15334 | 2.27973  | -3.9035  |
| C | -2.49351 | -2.03254 | -1.92503 | H | -2.97467 | 4.1958   | -2.55388 |
| C | -2.01355 | -1.35753 | -0.78781 | C | 3.05957  | 0.8496   | -0.49429 |
| H | 0.37068  | -3.55358 | -2.99265 | C | 3.37955  | 1.96457  | 0.28429  |
| H | -2.02602 | -3.33374 | -3.56124 | C | 4.00381  | 0.31441  | -1.37404 |
| H | -3.53128 | -1.96815 | -2.22986 | C | 4.63817  | 2.54443  | 0.1676   |
| C | 1.94758  | -1.44479 | 0.19121  | H | 2.64196  | 2.33771  | 0.99507  |
| O | 2.93804  | -1.62834 | 0.85855  | C | 5.25171  | 0.9075   | -1.4965  |
| N | 1.52201  | -2.33631 | -0.80221 | H | 3.74701  | -0.56529 | -1.96562 |
| C | 2.42596  | -3.37835 | -1.2485  | C | 5.57024  | 2.02272  | -0.72323 |
| H | 1.96438  | -4.36674 | -1.12408 | H | 4.89146  | 3.408    | 0.78006  |
| H | 2.69126  | -3.24192 | -2.30669 | H | 5.98193  | 0.49762  | -2.1923  |
| H | 3.32953  | -3.32331 | -0.63694 | H | 6.55359  | 2.48179  | -0.81372 |
| C | -2.74623 | -0.4474  | 0.10767  | C | 0.0189   | -1.88324 | 2.52029  |
| C | -4.06862 | 0.02028  | -0.03273 | O | -0.01519 | -2.65542 | 3.36229  |
| C | -4.56025 | 0.8792   | 0.94909  |   |          |          |          |
| C | -2.47789 | 0.8127   | 2.08591  |   |          |          |          |
| C | -3.78189 | 1.27284  | 2.0261   |   |          |          |          |
| H | -5.58128 | 1.24884  | 0.85283  |   |          |          |          |
| H | -1.77082 | 1.11622  | 2.85952  |   |          |          |          |
| H | -4.16305 | 1.94252  | 2.7923   |   |          |          |          |
| C | -4.95816 | -0.32834 | -1.18725 |   |          |          |          |
| H | -5.89208 | 0.24269  | -1.13044 |   |          |          |          |

## 86

### MeTSCl-D1(2)

|   |          |         |         |
|---|----------|---------|---------|
| C | -0.20049 | 0.59943 | 0.89487 |
| C | 0.02577  | -0.0615 | 2.13428 |
| C | 0.72121  | 0.58643 | 3.14771 |
| C | 1.30337  | 1.82868 | 2.86999 |
| C | 1.265    | 2.38825 | 1.5945  |

|    |          |          |          |   |          |          |          |
|----|----------|----------|----------|---|----------|----------|----------|
| C  | 0.54148  | 1.77345  | 0.56317  | C | -3.79021 | -1.03966 | 0.74058  |
| H  | 0.87431  | 0.11654  | 4.11773  | C | -4.64724 | -0.51164 | 1.72725  |
| H  | 1.85869  | 2.33543  | 3.65868  | C | -4.14853 | -2.22317 | 0.0753   |
| H  | 1.83739  | 3.2928   | 1.41496  | C | -5.83907 | -1.14797 | 2.02835  |
| C  | -0.8668  | -1.94576 | 0.98384  | H | -4.3567  | 0.40399  | 2.24234  |
| O  | -1.15235 | -3.11542 | 0.90734  | C | -5.34471 | -2.85177 | 0.38977  |
| N  | -0.47636 | -1.34268 | 2.19554  | H | -3.48961 | -2.61142 | -0.69846 |
| C  | -0.34618 | -2.15122 | 3.397    | C | -6.19005 | -2.3221  | 1.36186  |
| H  | 0.71443  | -2.29833 | 3.64294  | H | -6.49917 | -0.73137 | 2.78747  |
| H  | -0.86197 | -1.66829 | 4.23617  | H | -5.62172 | -3.76546 | -0.13306 |
| H  | -0.80226 | -3.12161 | 3.19231  | H | -7.12537 | -2.82502 | 1.60288  |
| C  | 0.46147  | 2.18262  | -0.8463  | C | 3.08523  | -0.52732 | 0.2952   |
| C  | 0.8023   | 3.44863  | -1.37674 | C | 3.81869  | 0.57434  | 0.7683   |
| C  | 0.67907  | 3.62308  | -2.75277 | C | 4.1805   | 1.61484  | -0.07165 |
| C  | -0.14749 | 1.40923  | -2.98227 | C | 3.78169  | 1.52736  | -1.40758 |
| C  | 0.21975  | 2.60525  | -3.57868 | C | 3.07279  | 0.43077  | -1.89447 |
| H  | 0.93315  | 4.59469  | -3.17861 | C | 2.71094  | -0.61635 | -1.04393 |
| H  | -0.58758 | 0.57415  | -3.53361 | H | 4.7507   | 2.46911  | 0.28973  |
| H  | 0.11111  | 2.74736  | -4.65104 | H | 4.03801  | 2.33653  | -2.09051 |
| C  | 1.2512   | 4.61292  | -0.54718 | H | 2.7861   | 0.38633  | -2.94487 |
| H  | 0.61297  | 4.75004  | 0.335    | C | 2.83506  | -1.40915 | 1.43983  |
| H  | 2.28746  | 4.49997  | -0.1953  | C | 3.50524  | -0.69501 | 2.6485   |
| H  | 1.21026  | 5.53653  | -1.13702 | O | 2.25091  | -2.46467 | 1.52352  |
| N  | -0.02505 | 1.21581  | -1.67106 | O | 3.51462  | -1.05627 | 3.80102  |
| Rh | -0.81702 | -0.63288 | -0.55904 | N | 4.09947  | 0.44115  | 2.13044  |
| Cl | -2.13953 | -1.32186 | -2.65055 | C | 4.78188  | 1.42306  | 2.92999  |
| C  | -1.948   | 0.80748  | 0.55477  | H | 5.83203  | 1.52276  | 2.62522  |
| C  | -2.58978 | -0.32888 | 0.45769  | H | 4.28969  | 2.40223  | 2.84451  |
| C  | -2.36317 | 2.1838   | 0.25827  | H | 4.73871  | 1.08507  | 3.97015  |
| C  | -2.9954  | 2.45992  | -0.95907 | C | 2.07627  | -1.8556  | -1.56301 |
| C  | -2.13805 | 3.21699  | 1.17239  | C | 2.90397  | -2.8034  | -2.18358 |
| C  | -3.37505 | 3.76127  | -1.26447 | C | 2.31534  | -3.99463 | -2.59832 |
| H  | -3.15757 | 1.64351  | -1.66462 | C | 0.22394  | -3.21942 | -1.76073 |
| C  | -2.53646 | 4.51444  | 0.86871  | C | 0.9673   | -4.21378 | -2.37544 |
| H  | -1.65083 | 2.99315  | 2.12168  | H | 2.92987  | -4.75479 | -3.08115 |
| C  | -3.1431  | 4.78975  | -0.35427 | H | -0.83544 | -3.34858 | -1.56289 |
| H  | -3.85457 | 3.97245  | -2.21885 | H | 0.48381  | -5.14142 | -2.66964 |
| H  | -2.37209 | 5.31356  | 1.59042  | C | 4.37591  | -2.57202 | -2.35915 |
| H  | -3.44293 | 5.8087   | -0.59503 | H | 4.87689  | -2.40979 | -1.39477 |

|            |          |          |          |   |          |          |          |
|------------|----------|----------|----------|---|----------|----------|----------|
| H          | 4.84679  | -3.43922 | -2.83667 | C | 2.29645  | 0.83374  | -1.0036  |
| H          | 4.58916  | -1.69119 | -2.9784  | C | 2.06027  | -0.32368 | -1.40355 |
| N          | 0.76123  | -2.05231 | -1.37516 | C | 2.14356  | -1.62073 | -2.01197 |
|            |          |          |          | C | 3.07902  | -2.54085 | -1.5201  |
| <b>88</b>  |          |          |          | C | 1.26382  | -2.01217 | -3.03032 |
| <b>MeE</b> |          |          |          | C | 3.11207  | -3.83618 | -2.02075 |
| C          | 1.64838  | -1.12329 | 1.25607  | H | 3.74707  | -2.23645 | -0.71449 |
| C          | 2.71496  | -0.71155 | 2.06624  | C | 1.30085  | -3.30762 | -3.52367 |
| C          | 3.4778   | -1.69331 | 2.71837  | H | 0.52411  | -1.30286 | -3.40069 |
| C          | 3.2159   | -3.04072 | 2.53256  | C | 2.21899  | -4.22478 | -3.01534 |
| C          | 2.16793  | -3.44699 | 1.72593  | H | 3.83271  | -4.54837 | -1.62151 |
| C          | 1.34609  | -2.50014 | 1.10019  | H | 0.60188  | -3.60811 | -4.30226 |
| H          | 4.28646  | -1.41032 | 3.38486  | H | 2.23882  | -5.2439  | -3.39798 |
| H          | 3.83946  | -3.7816  | 3.02935  | C | 3.05275  | 2.05693  | -0.91553 |
| H          | 2.0157   | -4.50742 | 1.5769   | C | 2.45985  | 3.314    | -1.07834 |
| C          | 2.32395  | 1.78537  | 2.09975  | C | 4.42745  | 1.96655  | -0.65301 |
| O          | 2.6845   | 2.86721  | 2.51915  | C | 3.23686  | 4.46057  | -0.98833 |
| N          | 3.0962   | 0.6478   | 2.25323  | H | 1.38658  | 3.38037  | -1.24882 |
| C          | 4.40663  | 0.90353  | 2.83935  | C | 5.19479  | 3.11847  | -0.55717 |
| H          | 4.42294  | 0.69754  | 3.91837  | H | 4.87083  | 0.97999  | -0.51261 |
| H          | 5.15915  | 0.28114  | 2.34173  | C | 4.60043  | 4.36682  | -0.72528 |
| H          | 4.64133  | 1.95875  | 2.69495  | H | 2.7707   | 5.43642  | -1.1093  |
| C          | 0.19604  | -2.86418 | 0.23838  | H | 6.26039  | 3.04277  | -0.34731 |
| C          | -0.40068 | -4.13661 | 0.07528  | H | 5.20179  | 5.27055  | -0.64458 |
| C          | -1.53431 | -4.21627 | -0.73695 | C | -3.67388 | 0.94318  | 0.30686  |
| C          | -1.39153 | -1.90993 | -1.20724 | C | -4.27428 | 0.7703   | 1.56419  |
| C          | -2.05944 | -3.10875 | -1.38237 | C | -4.09331 | 1.69063  | 2.57881  |
| H          | -2.02285 | -5.18506 | -0.84449 | C | -3.25828 | 2.77827  | 2.31094  |
| H          | -1.72014 | -0.99133 | -1.69166 | C | -2.60997 | 2.93453  | 1.08821  |
| H          | -2.96895 | -3.15114 | -1.9768  | C | -2.79243 | 1.99441  | 0.07419  |
| C          | 0.05063  | -5.40719 | 0.73357  | H | -4.55763 | 1.56754  | 3.555    |
| H          | 1.01936  | -5.75507 | 0.34601  | H | -3.08772 | 3.51529  | 3.0937   |
| H          | 0.14211  | -5.30407 | 1.82194  | H | -1.91798 | 3.75879  | 0.93611  |
| H          | -0.67651 | -6.2047  | 0.54075  | C | -4.10915 | -0.15912 | -0.53774 |
| N          | -0.32115 | -1.81186 | -0.42877 | C | -4.93921 | -1.08264 | 0.39625  |
| Rh         | 0.53763  | 0.11865  | 0.20875  | O | -3.9412  | -0.37742 | -1.71969 |
| Cl         | -1.04973 | -0.13645 | 2.00491  | O | -5.41343 | -2.15917 | 0.11918  |
| C          | 1.04529  | 1.73893  | 1.23331  | N | -5.01976 | -0.41696 | 1.60115  |
| O          | 0.38298  | 2.73904  | 1.16791  | C | -5.62489 | -0.97021 | 2.785    |

|   |          |          |          |    |          |          |          |
|---|----------|----------|----------|----|----------|----------|----------|
| H | -4.87116 | -1.12334 | 3.56917  | C  | 0.31045  | -2.83806 | -3.13379 |
| H | -6.41535 | -0.31179 | 3.16847  | H  | 1.57701  | -4.56683 | -3.28227 |
| H | -6.06172 | -1.93449 | 2.50869  | H  | -0.72188 | -0.99572 | -2.64318 |
| C | -2.11727 | 2.12865  | -1.2435  | H  | -0.13367 | -2.94438 | -4.11998 |
| C | -2.75955 | 2.88168  | -2.243   | C  | 2.85777  | -4.59312 | -0.97313 |
| C | -2.13342 | 2.98473  | -3.47929 | H  | 3.66871  | -4.10812 | -0.4155  |
| C | -0.36886 | 1.6271   | -2.64214 | H  | 2.47353  | -5.41657 | -0.35537 |
| C | -0.91949 | 2.34885  | -3.68822 | H  | 3.29652  | -5.04842 | -1.8697  |
| H | -2.60775 | 3.55864  | -4.27564 | N  | 0.49461  | -1.62089 | -1.10479 |
| H | 0.5915   | 1.12882  | -2.76632 | Rh | 0.18175  | 0.13026  | 0.35806  |
| H | -0.40187 | 2.40761  | -4.64279 | Cl | -1.42447 | -1.42051 | 1.38537  |
| C | -4.09104 | 3.52327  | -1.99843 | C  | -0.02377 | 1.37534  | 1.85248  |
| H | -4.87382 | 2.76484  | -1.85916 | O  | -1.05489 | 1.96125  | 2.04528  |
| H | -4.08736 | 4.14608  | -1.09511 | C  | 1.71566  | 1.48716  | -0.1288  |
| H | -4.38307 | 4.1513   | -2.84827 | C  | 2.37789  | 0.3846   | -0.06361 |
| N | -0.93935 | 1.50893  | -1.43437 | C  | 3.44829  | -0.31469 | -0.7661  |

**88**

**MeTS<sub>E-E1</sub>**

|   |          |          |          |   |          |          |          |
|---|----------|----------|----------|---|----------|----------|----------|
| C | 1.64338  | -0.91945 | 1.277    | H | 4.43926  | -1.03297 | 1.00566  |
| C | 2.0894   | -0.59357 | 2.5712   | C | 4.49622  | -0.89949 | -2.86973 |
| C | 2.59081  | -1.60424 | 3.40111  | H | 2.68666  | 0.2658   | -2.69151 |
| C | 2.63449  | -2.91592 | 2.95968  | C | 5.50141  | -1.57382 | -2.18268 |
| C | 2.22765  | -3.24272 | 1.66974  | H | 6.28238  | -2.1252  | -0.25046 |
| C | 1.75488  | -2.25937 | 0.80604  | H | 4.50168  | -0.8681  | -3.95779 |
| H | 2.9047   | -1.36366 | 4.41458  | H | 6.29961  | -2.07015 | -2.73222 |
| H | 2.98351  | -3.69767 | 3.63137  | C | 1.84446  | 2.90373  | -0.37653 |
| H | 2.23939  | -4.28366 | 1.36446  | C | 0.78345  | 3.80636  | -0.22001 |
| C | 1.18242  | 1.71939  | 2.75404  | C | 3.09379  | 3.38938  | -0.80199 |
| O | 1.2894   | 2.8568   | 3.16746  | C | 0.97086  | 5.15651  | -0.48692 |
| N | 2.10003  | 0.73305  | 3.04683  | H | -0.18338 | 3.44567  | 0.12677  |
| C | 3.17127  | 1.12146  | 3.95711  | C | 3.27105  | 4.73709  | -1.07139 |
| H | 2.94228  | 0.85259  | 4.99712  | H | 3.91997  | 2.68812  | -0.91897 |
| H | 4.10076  | 0.62829  | 3.65209  | C | 2.20854  | 5.62581  | -0.91516 |
| H | 3.28375  | 2.20587  | 3.90055  | H | 0.14232  | 5.84925  | -0.35126 |
| C | 1.33337  | -2.54155 | -0.58223 | H | 4.24313  | 5.09894  | -1.40276 |
| C | 1.78902  | -3.61787 | -1.3741  | H | 2.3494   | 6.68557  | -1.12152 |
| C | 1.24523  | -3.74002 | -2.65324 | C | -3.8902  | -0.26621 | -0.09219 |
| C | -0.02016 | -1.76387 | -2.32106 | C | -4.67143 | -0.90296 | 0.88318  |

|   |          |          |          |    |          |          |          |
|---|----------|----------|----------|----|----------|----------|----------|
| C | -5.07287 | -0.23771 | 2.02574  | H  | 0.92299  | -4.95032 | 1.81588  |
| C | -4.64732 | 1.085    | 2.17965  | H  | 0.82335  | -4.47271 | -0.60774 |
| C | -3.84809 | 1.71947  | 1.23369  | C  | 1.50154  | 0.62264  | 2.71561  |
| C | -3.43905 | 1.03425  | 0.08912  | O  | 2.00464  | 1.59929  | 3.2264   |
| H | -5.67413 | -0.72547 | 2.79024  | N  | 2.04618  | -0.63963 | 2.80666  |
| H | -4.9363  | 1.63066  | 3.07629  | C  | 3.2537   | -0.77245 | 3.61929  |
| H | -3.49138 | 2.73232  | 1.40834  | H  | 3.16953  | -0.10892 | 4.48339  |
| C | -3.63035 | -1.24016 | -1.15111 | H  | 3.3542   | -1.80973 | 3.95241  |
| C | -4.28965 | -2.55677 | -0.65571 | H  | 4.14552  | -0.48857 | 3.04137  |
| O | -3.08218 | -1.12471 | -2.22482 | C  | 1.09475  | -2.10272 | -1.80986 |
| O | -4.27531 | -3.63354 | -1.20204 | C  | 1.56396  | -2.82049 | -2.91658 |
| N | -4.92062 | -2.23453 | 0.53046  | C  | 1.02333  | -2.48331 | -4.15862 |
| C | -5.5206  | -3.21121 | 1.40097  | C  | -0.33734 | -0.83096 | -3.10945 |
| H | -4.95685 | -3.28661 | 2.3412   | C  | 0.05004  | -1.50262 | -4.26338 |
| H | -6.56489 | -2.95614 | 1.62502  | H  | 1.36833  | -3.01338 | -5.04719 |
| H | -5.4882  | -4.1739  | 0.88206  | H  | -1.11457 | -0.06711 | -3.12619 |
| C | -2.6072  | 1.65266  | -0.97336 | H  | -0.4048  | -1.25621 | -5.21952 |
| C | -3.22767 | 2.53986  | -1.87173 | C  | 2.59931  | -3.90018 | -2.80909 |
| C | -2.4819  | 2.99754  | -2.95218 | H  | 3.28915  | -3.72848 | -1.975   |
| C | -0.64811 | 1.70033  | -2.18107 | H  | 2.14427  | -4.88907 | -2.65643 |
| C | -1.17987 | 2.55672  | -3.12852 | H  | 3.19149  | -3.95897 | -3.73068 |
| H | -2.93844 | 3.68082  | -3.66859 | N  | 0.1897   | -1.11106 | -1.91984 |
| H | 0.3792   | 1.34718  | -2.2709  | Rh | -0.03981 | -0.0446  | 0.21768  |
| H | -0.57842 | 2.87475  | -3.97637 | Cl | -1.71082 | -1.82825 | 0.79291  |
| C | -4.6647  | 2.93549  | -1.71061 | C  | 0.12476  | 0.77544  | 1.97783  |
| H | -5.32438 | 2.05783  | -1.74608 | O  | -0.68268 | 1.49167  | 2.50462  |
| H | -4.85237 | 3.42909  | -0.74911 | C  | 1.74947  | 0.86107  | -0.18387 |
| H | -4.96997 | 3.62019  | -2.51052 | C  | 2.57573  | -0.16116 | 0.06933  |
| N | -1.32401 | 1.26883  | -1.10717 | C  | 4.04194  | -0.20668 | 0.21282  |
|   |          |          |          | C  | 4.78121  | 0.95048  | 0.50094  |
|   |          |          |          | C  | 4.72001  | -1.43258 | 0.16247  |
|   |          |          |          | C  | 6.15216  | 0.88076  | 0.70685  |
| C | 1.799    | -1.38838 | 0.50192  | H  | 4.26758  | 1.9057   | 0.59855  |
| C | 1.73379  | -1.66428 | 1.89215  | C  | 6.09321  | -1.49886 | 0.36604  |
| C | 1.43018  | -2.94177 | 2.36004  | H  | 4.15752  | -2.34987 | -0.02038 |
| C | 1.17722  | -3.95597 | 1.45433  | C  | 6.81683  | -0.34188 | 0.63672  |
| C | 1.14939  | -3.69598 | 0.08196  | H  | 6.70506  | 1.78893  | 0.94231  |
| C | 1.42289  | -2.42753 | -0.40093 | H  | 6.59925  | -2.46228 | 0.31949  |
| H | 1.36482  | -3.11683 | 3.43233  | H  | 7.89134  | -0.39341 | 0.80411  |

**88**  
**MeE1**



|   |          |          |          |            |          |          |          |
|---|----------|----------|----------|------------|----------|----------|----------|
| C | 2.05193  | 2.22414  | -0.60504 | H          | -4.27221 | 4.02397  | 0.99154  |
| C | 1.6749   | 3.32727  | 0.17432  | H          | -4.64243 | 4.64976  | -0.62584 |
| C | 2.68679  | 2.44892  | -1.83617 | N          | -1.29088 | 1.56654  | -0.5703  |
| C | 1.94063  | 4.61788  | -0.26583 |            |          |          |          |
| H | 1.17995  | 3.16541  | 1.13245  | <b>88</b>  |          |          |          |
| C | 2.9369   | 3.74262  | -2.27715 | <b>MeF</b> |          |          |          |
| H | 2.97385  | 1.58763  | -2.44163 | C          | -0.12584 | 0.02141  | -0.81238 |
| C | 2.56467  | 4.83197  | -1.49281 | C          | 0.04942  | -1.02633 | -1.73109 |
| H | 1.65362  | 5.46567  | 0.35432  | C          | -0.76838 | -1.09061 | -2.87029 |
| H | 3.42715  | 3.90133  | -3.23684 | C          | -1.70884 | -0.10283 | -3.1203  |
| H | 2.76225  | 5.84602  | -1.83677 | C          | -1.86594 | 0.95475  | -2.23884 |
| C | -3.93059 | 0.13462  | 0.27949  | C          | -1.08599 | 1.03354  | -1.07465 |
| C | -4.77326 | -0.67614 | 1.05236  | H          | -0.68328 | -1.91719 | -3.57172 |
| C | -5.03554 | -0.37256 | 2.37464  | H          | -2.32846 | -0.15655 | -4.01533 |
| C | -4.40834 | 0.75795  | 2.90989  | H          | -2.58203 | 1.72632  | -2.48943 |
| C | -3.55068 | 1.55616  | 2.16018  | C          | 1.57512  | -2.48508 | -0.37032 |
| C | -3.28475 | 1.23319  | 0.82797  | O          | 2.1673   | -3.54324 | -0.28802 |
| H | -5.6817  | -0.99653 | 2.98908  | N          | 1.02797  | -2.04479 | -1.56153 |
| H | -4.59003 | 1.01456  | 3.95235  | C          | 1.35837  | -2.88289 | -2.70527 |
| H | -3.04987 | 2.40452  | 2.61995  | H          | 0.60379  | -3.66538 | -2.87891 |
| C | -3.82347 | -0.4761  | -1.04833 | H          | 1.44441  | -2.25968 | -3.60171 |
| C | -4.64799 | -1.78676 | -0.95002 | H          | 2.31351  | -3.37237 | -2.50463 |
| O | -3.29718 | -0.07823 | -2.06381 | C          | -1.14778 | 2.20163  | -0.1595  |
| O | -4.79994 | -2.62544 | -1.80517 | C          | -2.13023 | 3.22224  | -0.13723 |
| N | -5.21893 | -1.77421 | 0.31013  | C          | -1.93433 | 4.26951  | 0.76458  |
| C | -5.95634 | -2.8828  | 0.85414  | C          | 0.04958  | 3.26031  | 1.56272  |
| H | -5.39941 | -3.35523 | 1.6755   | C          | -0.84265 | 4.31662  | 1.61588  |
| H | -6.93947 | -2.56097 | 1.22231  | H          | -2.67905 | 5.06517  | 0.79705  |
| H | -6.09407 | -3.61002 | 0.04828  | H          | 0.932    | 3.19218  | 2.20317  |
| C | -2.45995 | 2.0504   | -0.09534 | H          | -0.69567 | 5.13761  | 2.31316  |
| C | -3.03395 | 3.23109  | -0.6012  | C          | -3.37876 | 3.27455  | -0.97026 |
| C | -2.40166 | 3.87156  | -1.66072 | H          | -3.17039 | 3.55242  | -2.01338 |
| C | -0.74503 | 2.17303  | -1.63592 | H          | -3.93378 | 2.3282   | -0.96786 |
| C | -1.26057 | 3.31691  | -2.21378 | H          | -4.05284 | 4.04123  | -0.57024 |
| H | -2.83348 | 4.78449  | -2.07087 | N          | -0.11477 | 2.25363  | 0.70977  |
| H | 0.15738  | 1.72461  | -2.03537 | Rh         | 1.06211  | 0.32696  | 0.7571   |
| H | -0.75348 | 3.76302  | -3.06556 | Cl         | 2.6796   | 1.24006  | 2.49568  |
| C | -4.33499 | 3.75615  | -0.07014 | C          | 1.51267  | -1.58403 | 0.88475  |
| H | -5.13363 | 3.00786  | -0.15996 | O          | 1.68236  | -2.1003  | 1.95657  |

|   |          |          |          |                            |          |          |          |
|---|----------|----------|----------|----------------------------|----------|----------|----------|
| C | 2.96224  | 0.29973  | -0.45856 | H                          | -3.50408 | -2.59173 | -3.71496 |
| C | 2.33481  | 1.30082  | -0.84636 | H                          | -4.84136 | -3.49478 | -2.93809 |
| C | 1.9528   | 2.56803  | -1.39592 | H                          | -5.1058  | -1.82218 | -3.50884 |
| C | 1.23223  | 2.6415   | -2.5944  | C                          | -1.55946 | -1.03718 | 2.26818  |
| C | 2.27993  | 3.74369  | -0.70572 | C                          | -2.44484 | -1.20619 | 3.34653  |
| C | 0.82079  | 3.87624  | -3.08045 | C                          | -2.23039 | -0.44597 | 4.49079  |
| H | 0.98464  | 1.72266  | -3.12487 | C                          | -0.33827 | 0.54012  | 3.43512  |
| C | 1.86185  | 4.97167  | -1.19733 | C                          | -1.16499 | 0.43447  | 4.53972  |
| H | 2.83995  | 3.66501  | 0.22595  | H                          | -2.90098 | -0.56019 | 5.34245  |
| C | 1.12672  | 5.03991  | -2.3798  | H                          | 0.54329  | 1.17809  | 3.44906  |
| H | 0.25375  | 3.92893  | -4.00857 | H                          | -0.95325 | 1.0295   | 5.42428  |
| H | 2.10799  | 5.88236  | -0.65384 | C                          | -3.59454 | -2.16733 | 3.28213  |
| H | 0.79448  | 6.00524  | -2.75861 | H                          | -4.39119 | -1.79779 | 2.62152  |
| C | 3.98793  | -0.70869 | -0.46414 | H                          | -3.29056 | -3.1521  | 2.90591  |
| C | 4.58524  | -1.16715 | 0.71616  | H                          | -4.03354 | -2.30583 | 4.27707  |
| C | 4.38154  | -1.24128 | -1.7012  | N                          | -0.52643 | -0.16918 | 2.3094   |
| C | 5.55684  | -2.15661 | 0.64939  |                            |          |          |          |
| H | 4.26909  | -0.74008 | 1.6675   |                            |          |          |          |
| C | 5.35318  | -2.22956 | -1.75446 |                            |          |          |          |
| H | 3.90681  | -0.87156 | -2.61014 |                            |          |          |          |
| C | 5.93756  | -2.69224 | -0.57763 |                            |          |          |          |
| H | 6.0142   | -2.51898 | 1.56791  |                            |          |          |          |
| H | 5.65505  | -2.64248 | -2.71571 |                            |          |          |          |
| H | 6.69292  | -3.47526 | -0.61907 |                            |          |          |          |
| C | -2.76439 | -1.6121  | 0.13804  |                            |          |          |          |
| C | -3.01673 | -2.47354 | -0.94103 |                            |          |          |          |
| C | -2.32713 | -3.66623 | -1.09059 |                            |          |          |          |
| C | -1.36802 | -3.97266 | -0.12481 |                            |          |          |          |
| C | -1.10076 | -3.12355 | 0.94989  |                            |          |          |          |
| C | -1.78096 | -1.90902 | 1.08107  |                            |          |          |          |
| H | -2.5163  | -4.3363  | -1.92717 |                            |          |          |          |
| H | -0.79493 | -4.89473 | -0.21423 |                            |          |          |          |
| H | -0.337   | -3.3956  | 1.67624  |                            |          |          |          |
| C | -3.65164 | -0.4608  | -0.00864 |                            |          |          |          |
| C | -4.39894 | -0.6982  | -1.35096 |                            |          |          |          |
| O | -3.85986 | 0.48479  | 0.71857  |                            |          |          |          |
| O | -5.16802 | 0.05259  | -1.903   |                            |          |          |          |
| N | -4.0059  | -1.95089 | -1.78218 |                            |          |          |          |
| C | -4.38067 | -2.50576 | -3.05635 |                            |          |          |          |
|   |          |          |          | <b>88</b>                  |          |          |          |
|   |          |          |          | <b>MeTS<sub>F-F1</sub></b> |          |          |          |
|   |          |          |          | C                          | 0.16301  | 0.23572  | -0.86158 |
|   |          |          |          | C                          | 0.07268  | -0.72578 | -1.90591 |
|   |          |          |          | C                          | -0.82103 | -0.52826 | -2.9607  |
|   |          |          |          | C                          | -1.63954 | 0.59128  | -2.97849 |
|   |          |          |          | C                          | -1.61649 | 1.50749  | -1.93244 |
|   |          |          |          | C                          | -0.74282 | 1.35128  | -0.85234 |
|   |          |          |          | H                          | -0.8911  | -1.26181 | -3.76192 |
|   |          |          |          | H                          | -2.3338  | 0.74796  | -3.80397 |
|   |          |          |          | H                          | -2.31524 | 2.33032  | -1.98114 |
|   |          |          |          | C                          | 1.4259   | -2.57737 | -0.90209 |
|   |          |          |          | O                          | 2.10176  | -3.56974 | -1.07396 |
|   |          |          |          | N                          | 0.94789  | -1.82418 | -1.96593 |
|   |          |          |          | C                          | 1.33917  | -2.32726 | -3.27895 |
|   |          |          |          | H                          | 0.62175  | -3.06327 | -3.66887 |
|   |          |          |          | H                          | 1.41928  | -1.4874  | -3.97605 |
|   |          |          |          | H                          | 2.30898  | -2.81996 | -3.17486 |
|   |          |          |          | C                          | -0.63746 | 2.30823  | 0.27133  |
|   |          |          |          | C                          | -1.29227 | 3.56064  | 0.38787  |
|   |          |          |          | C                          | -0.97049 | 4.34431  | 1.4955   |
|   |          |          |          | C                          | 0.51045  | 2.67893  | 2.29045  |

|    |          |          |          |             |          |          |          |
|----|----------|----------|----------|-------------|----------|----------|----------|
| C  | -0.06569 | 3.92593  | 2.45829  | C           | -3.07378 | -2.96466 | -1.81747 |
| H  | -1.45531 | 5.31549  | 1.59667  | C           | -2.25561 | -3.63258 | -0.90306 |
| H  | 1.23908  | 2.25901  | 2.98834  | C           | -1.88795 | -3.06067 | 0.31427  |
| H  | 0.18636  | 4.54733  | 3.31394  | C           | -2.319   | -1.77315 | 0.6551   |
| C  | -2.30958 | 4.11648  | -0.56426 | H           | -3.36004 | -3.42785 | -2.7599  |
| H  | -1.90036 | 4.25654  | -1.57454 | H           | -1.89879 | -4.63303 | -1.14267 |
| H  | -3.19927 | 3.47441  | -0.63628 | H           | -1.2566  | -3.61232 | 1.0071   |
| H  | -2.64737 | 5.09859  | -0.21354 | C           | -3.72979 | 0.23801  | -0.22518 |
| N  | 0.22567  | 1.91754  | 1.23873  | C           | -4.43972 | 0.3878   | -1.60059 |
| Rh | 0.99612  | -0.21729 | 0.95157  | O           | -3.73598 | 1.09919  | 0.62504  |
| Cl | 2.46183  | -0.10491 | 3.00699  | O           | -4.98465 | 1.37387  | -2.03841 |
| C  | 1.13597  | -2.11471 | 0.5393   | N           | -4.31087 | -0.83719 | -2.22627 |
| O  | 0.98151  | -2.94703 | 1.3939   | C           | -4.74434 | -1.09355 | -3.57441 |
| C  | 2.70882  | -0.13169 | -0.21895 | H           | -3.88483 | -1.31565 | -4.22423 |
| C  | 1.95465  | 0.77499  | -0.76565 | H           | -5.44586 | -1.93663 | -3.61245 |
| C  | 2.12808  | 2.18462  | -1.11703 | H           | -5.24676 | -0.19023 | -3.93447 |
| C  | 1.5974   | 2.72147  | -2.29469 | C           | -2.07239 | -1.22399 | 2.01737  |
| C  | 2.83     | 3.0166   | -0.23635 | C           | -3.10406 | -1.38798 | 2.95843  |
| C  | 1.75157  | 4.07306  | -2.57689 | C           | -2.88477 | -0.91187 | 4.24633  |
| H  | 1.06099  | 2.07306  | -2.98655 | C           | -0.71642 | -0.19897 | 3.57101  |
| C  | 2.96633  | 4.37058  | -0.51411 | C           | -1.67908 | -0.30986 | 4.56008  |
| H  | 3.23484  | 2.58581  | 0.67999  | H           | -3.66444 | -1.02763 | 4.99959  |
| C  | 2.42309  | 4.90137  | -1.68108 | H           | 0.2662   | 0.21855  | 3.78366  |
| H  | 1.34309  | 4.48282  | -3.49938 | H           | -1.46893 | 0.06054  | 5.5603   |
| H  | 3.49992  | 5.01395  | 0.18334  | C           | -4.40394 | -2.04852 | 2.60723  |
| H  | 2.52861  | 5.96351  | -1.89673 | H           | -5.03234 | -1.39606 | 1.98558  |
| C  | 3.91651  | -0.88687 | -0.34496 | H           | -4.25621 | -2.98259 | 2.05042  |
| C  | 4.42465  | -1.69193 | 0.68543  | H           | -4.9728  | -2.28218 | 3.51482  |
| C  | 4.58366  | -0.84784 | -1.58565 | N           | -0.89982 | -0.63696 | 2.31565  |
| C  | 5.58547  | -2.42338 | 0.47691  |             |          |          |          |
| H  | 3.90102  | -1.71947 | 1.64031  | <b>88</b>   |          |          |          |
| C  | 5.74339  | -1.57872 | -1.77896 | <b>MeF1</b> |          |          |          |
| H  | 4.1627   | -0.24022 | -2.38791 | C           | -0.66077 | 0.90106  | -0.78817 |
| C  | 6.24675  | -2.37069 | -0.74674 | C           | 0.46947  | 1.60779  | -0.32872 |
| H  | 5.97368  | -3.04804 | 1.27908  | C           | 1.54941  | 1.84766  | -1.19265 |
| H  | 6.25395  | -1.5411  | -2.73999 | C           | 1.5549   | 1.32195  | -2.47053 |
| H  | 7.15272  | -2.95412 | -0.90286 | C           | 0.50994  | 0.49083  | -2.89615 |
| C  | -3.13761 | -1.10147 | -0.2512  | C           | -0.57813 | 0.27551  | -2.07194 |
| C  | -3.50388 | -1.69564 | -1.47055 | H           | 2.37084  | 2.47458  | -0.84697 |

|    |          |          |          |   |          |          |          |
|----|----------|----------|----------|---|----------|----------|----------|
| H  | 2.4058   | 1.50688  | -3.1245  | C | -3.38959 | -0.3859  | 1.46137  |
| H  | 0.56957  | -0.01142 | -3.86067 | C | -4.56565 | -0.66404 | 0.74942  |
| C  | 0.23176  | 1.52802  | 2.13561  | C | -3.37693 | -0.55342 | 2.85093  |
| O  | 0.20976  | 2.11185  | 3.19456  | C | -5.71059 | -1.07977 | 1.41712  |
| N  | 0.46333  | 2.1959   | 0.94622  | H | -4.56683 | -0.53742 | -0.33511 |
| C  | 0.7903   | 3.61289  | 1.05289  | C | -4.52883 | -0.95478 | 3.51407  |
| H  | 1.87034  | 3.7725   | 1.19442  | H | -2.45533 | -0.37679 | 3.40375  |
| H  | 0.4613   | 4.12977  | 0.14588  | C | -5.69617 | -1.22034 | 2.80213  |
| H  | 0.26898  | 4.01938  | 1.92291  | H | -6.61839 | -1.29392 | 0.85455  |
| C  | -1.63382 | -0.71642 | -2.39005 | H | -4.51055 | -1.07467 | 4.5959   |
| C  | -2.51862 | -0.63781 | -3.47026 | H | -6.59366 | -1.54389 | 3.32721  |
| C  | -3.4744  | -1.65157 | -3.56386 | C | 3.89537  | 0.13132  | 0.29601  |
| C  | -2.61809 | -2.64584 | -1.5697  | C | 4.21926  | 1.23918  | 1.09917  |
| C  | -3.53246 | -2.6651  | -2.61652 | C | 3.88777  | 1.28261  | 2.44228  |
| H  | -4.19285 | -1.62545 | -4.3837  | C | 3.21889  | 0.17558  | 2.97122  |
| H  | -2.62548 | -3.37695 | -0.75815 | C | 2.87823  | -0.92455 | 2.18467  |
| H  | -4.28599 | -3.4468  | -2.6751  | C | 3.19101  | -0.95167 | 0.82571  |
| C  | -2.48596 | 0.50008  | -4.44533 | H | 4.12015  | 2.14522  | 3.06374  |
| H  | -2.4998  | 1.46746  | -3.9244  | H | 2.91068  | 0.18736  | 4.01493  |
| H  | -1.58814 | 0.48434  | -5.07698 | H | 2.31497  | -1.7492  | 2.61685  |
| H  | -3.35628 | 0.46641  | -5.11123 | C | 4.37022  | 0.41814  | -1.05444 |
| N  | -1.68666 | -1.69837 | -1.47486 | C | 4.95603  | 1.85826  | -0.98085 |
| Rh | -0.48988 | -0.97724 | 0.5085   | O | 4.37292  | -0.24852 | -2.06488 |
| Cl | -1.21878 | -2.94032 | 1.62574  | O | 5.39828  | 2.51249  | -1.8948  |
| C  | 0.05549  | -0.05576 | 2.14604  | N | 4.84958  | 2.23887  | 0.34261  |
| O  | 0.19841  | -0.55531 | 3.22635  | C | 5.28609  | 3.51578  | 0.84792  |
| C  | -2.21093 | 0.04861  | 0.72701  | H | 4.44334  | 4.09192  | 1.25495  |
| C  | -2.0008  | 1.0718   | -0.11212 | H | 6.04185  | 3.38966  | 1.63392  |
| C  | -2.7941  | 2.26353  | -0.44848 | H | 5.72567  | 4.06458  | 0.00966  |
| C  | -2.39575 | 3.10067  | -1.50334 | C | 2.76434  | -2.10751 | -0.00162 |
| C  | -3.93982 | 2.62317  | 0.27941  | C | 3.72084  | -3.01585 | -0.48207 |
| C  | -3.1301  | 4.23344  | -1.83843 | C | 3.2568   | -4.1133  | -1.19954 |
| H  | -1.49356 | 2.86628  | -2.07245 | C | 1.02949  | -3.33431 | -0.88419 |
| C  | -4.66665 | 3.75618  | -0.05553 | C | 1.89763  | -4.27733 | -1.40958 |
| H  | -4.25458 | 2.00802  | 1.12051  | H | 3.97174  | -4.84192 | -1.58242 |
| C  | -4.27243 | 4.56545  | -1.11935 | H | -0.04473 | -3.44018 | -1.0022  |
| H  | -2.80126 | 4.86187  | -2.66525 | H | 1.50569  | -5.13085 | -1.95725 |
| H  | -5.55004 | 4.01471  | 0.52667  | C | 5.18687  | -2.83353 | -0.23531 |
| H  | -4.8475  | 5.45283  | -1.37837 | H | 5.60723  | -2.09219 | -0.92852 |

|   |         |          |          |
|---|---------|----------|----------|
| H | 5.39421 | -2.49121 | 0.78613  |
| H | 5.72428 | -3.77627 | -0.39175 |
| N | 1.44088 | -2.26237 | -0.19288 |

**64**  
**MeTS<sub>A1'</sub>-B'(1)**

|    |          |          |          |
|----|----------|----------|----------|
| C  | -3.06741 | -0.38809 | 0.26673  |
| C  | -3.79136 | -1.48808 | -0.23669 |
| C  | -3.28177 | -2.77383 | -0.20982 |
| C  | -1.97228 | -2.94201 | 0.23943  |
| C  | -1.20232 | -1.86545 | 0.69732  |
| C  | -1.7904  | -0.5854  | 0.83308  |
| H  | -3.85473 | -3.6205  | -0.58404 |
| H  | -1.50657 | -3.92535 | 0.1962   |
| C  | -3.76658 | 0.79932  | -0.21815 |
| C  | -5.08444 | 0.28514  | -0.86129 |
| O  | -3.4363  | 1.96662  | -0.26908 |
| O  | -5.97549 | 0.95697  | -1.32295 |
| N  | -5.00771 | -1.0862  | -0.81156 |
| C  | -5.99021 | -1.96978 | -1.38416 |
| H  | -5.56226 | -2.55309 | -2.21079 |
| H  | -6.38795 | -2.66021 | -0.62926 |
| H  | -6.80324 | -1.34594 | -1.76735 |
| C  | -0.9517  | 0.41937  | 1.49472  |
| C  | -1.36953 | 1.57417  | 2.18444  |
| C  | -0.37468 | 2.42772  | 2.66879  |
| C  | 1.29342  | 0.87625  | 2.00058  |
| C  | 0.96722  | 2.10521  | 2.55615  |
| H  | -0.67521 | 3.34873  | 3.1687   |
| H  | 2.32379  | 0.5286   | 1.94676  |
| H  | 1.75052  | 2.77335  | 2.90647  |
| C  | -2.79157 | 1.89653  | 2.52435  |
| H  | -2.83717 | 2.3      | 3.54355  |
| H  | -3.21769 | 2.64369  | 1.84502  |
| H  | -3.43595 | 1.01136  | 2.48343  |
| N  | 0.36729  | 0.06693  | 1.48471  |
| Rh | 0.78717  | -1.82653 | 0.76135  |
| Cl | 1.16187  | -4.04248 | 0.02919  |
| H  | -0.09304 | -2.39344 | 1.92898  |

|   |          |          |          |
|---|----------|----------|----------|
| C | 1.57859  | 1.57586  | -1.07539 |
| C | 0.31767  | 2.12386  | -1.37359 |
| C | -0.65032 | 1.39058  | -2.04189 |
| C | -0.33686 | 0.07205  | -2.37435 |
| C | 0.88352  | -0.50989 | -2.02786 |
| C | 1.86068  | 0.23904  | -1.36295 |
| H | -1.62681 | 1.81449  | -2.26637 |
| H | -1.08343 | -0.53702 | -2.8828  |
| H | 1.07398  | -1.55843 | -2.25468 |
| C | 2.31115  | 2.58009  | -0.30443 |
| C | 1.32581  | 3.77262  | -0.15232 |
| O | 3.42814  | 2.56868  | 0.16456  |
| O | 1.50925  | 4.78765  | 0.47616  |
| N | 0.19485  | 3.41857  | -0.85774 |
| C | -1.01762 | 4.20525  | -0.87672 |
| H | -1.27812 | 4.4969   | -1.90223 |
| H | -1.85213 | 3.63843  | -0.443   |
| H | -0.82566 | 5.10633  | -0.28661 |
| C | 3.07941  | -0.44325 | -0.85737 |
| C | 4.36854  | -0.15658 | -1.32207 |
| C | 5.41478  | -0.90927 | -0.79195 |
| C | 3.85864  | -2.12693 | 0.5414   |
| C | 5.16738  | -1.90113 | 0.14551  |
| H | 6.43166  | -0.71549 | -1.13342 |
| H | 3.59044  | -2.91417 | 1.24291  |
| H | 5.97241  | -2.50401 | 0.55757  |
| C | 4.62386  | 0.91183  | -2.33776 |
| H | 3.84552  | 0.93803  | -3.11006 |
| H | 4.64589  | 1.89802  | -1.85339 |
| H | 5.59035  | 0.75861  | -2.83187 |
| N | 2.84083  | -1.40261 | 0.05988  |

**53**  
**MeTS<sub>A1'</sub>-B'(2)**

|   |         |          |          |
|---|---------|----------|----------|
| C | 2.57441 | -0.25637 | -0.00201 |
| C | 3.03264 | -1.55946 | -0.27291 |
| C | 2.17486 | -2.53784 | -0.72897 |
| C | 0.82752 | -2.19283 | -0.86536 |
| C | 0.32042 | -0.91384 | -0.59621 |

|   |          |          |          |                                             |          |          |          |
|---|----------|----------|----------|---------------------------------------------|----------|----------|----------|
| C | 1.23201  | 0.09629  | -0.19191 | H                                           | -3.71198 | -3.64883 | 0.076    |
| H | 2.51865  | -3.54575 | -0.95442 | Rh                                          | -1.66676 | -0.28114 | -0.34036 |
| H | 0.14656  | -2.97065 | -1.21325 | Cl                                          | -1.53513 | 1.31369  | -2.14454 |
| C | 3.70858  | 0.46675  | 0.59072  | H                                           | -3.94932 | 0.18017  | -1.72623 |
| C | 4.89802  | -0.53485 | 0.5656   | H                                           | -3.5549  | 1.5665   | 0.13048  |
| O | 3.80113  | 1.58081  | 1.05015  | H                                           | -1.47542 | -2.92558 | 0.20748  |
| O | 6.02706  | -0.33681 | 0.94304  | H                                           | -0.72545 | -1.41221 | 1.88292  |
| N | 4.39476  | -1.69676 | 0.01899  | H                                           | -4.09328 | -2.18248 | -1.71632 |
| C | 5.16214  | -2.90214 | -0.15528 | H                                           | -1.02933 | -1.13908 | -1.5078  |
| H | 4.75788  | -3.72024 | 0.4562   |                                             |          |          |          |
| H | 5.17093  | -3.21352 | -1.20804 |                                             |          |          |          |
| H | 6.18548  | -2.68513 | 0.16532  |                                             |          |          |          |
| C | 0.73779  | 1.4582   | 0.12431  |                                             |          |          |          |
| C | 1.31441  | 2.6319   | -0.38478 |                                             |          |          |          |
| C | 0.74072  | 3.83931  | 0.01344  |                                             |          |          |          |
| C | -0.9087  | 2.64703  | 1.23127  |                                             |          |          |          |
| C | -0.36217 | 3.86369  | 0.85058  |                                             |          |          |          |
| H | 1.16084  | 4.77041  | -0.368   |                                             |          |          |          |
| H | -1.819   | 2.6049   | 1.83288  |                                             |          |          |          |
| H | -0.81387 | 4.80015  | 1.16918  |                                             |          |          |          |
| C | 2.42228  | 2.65463  | -1.39044 |                                             |          |          |          |
| H | 2.2206   | 3.42265  | -2.14746 |                                             |          |          |          |
| H | 3.38387  | 2.89217  | -0.91841 |                                             |          |          |          |
| H | 2.52593  | 1.69679  | -1.91208 |                                             |          |          |          |
| N | -0.38074 | 1.47759  | 0.87857  |                                             |          |          |          |
| C | -3.88977 | -0.31448 | -0.75619 |                                             |          |          |          |
| C | -3.65641 | 0.49909  | 0.3416   |                                             |          |          |          |
| C | -2.20978 | -2.20637 | 0.57276  |                                             |          |          |          |
| C | -3.88412 | 0.10281  | 1.7868   |                                             |          |          |          |
| C | -1.76391 | -1.31927 | 1.55552  |                                             |          |          |          |
| C | -2.6413  | -0.49874 | 2.46521  |                                             |          |          |          |
| H | -4.19405 | 0.99186  | 2.35293  |                                             |          |          |          |
| H | -4.73337 | -0.59143 | 1.85112  |                                             |          |          |          |
| H | -2.01628 | 0.31392  | 2.85903  |                                             |          |          |          |
| H | -2.93936 | -1.10179 | 3.34068  |                                             |          |          |          |
| C | -4.33517 | -1.75125 | -0.7351  |                                             |          |          |          |
| H | -5.43391 | -1.80697 | -0.64188 |                                             |          |          |          |
| C | -3.66103 | -2.58733 | 0.35306  |                                             |          |          |          |
| H | -4.20417 | -2.50477 | 1.30427  |                                             |          |          |          |
|   |          |          |          | <b>53</b>                                   |          |          |          |
|   |          |          |          | <b>Me<sup>e</sup>TS<sub>A1'-B'</sub>(3)</b> |          |          |          |
|   |          |          |          | C                                           | -2.64356 | -0.06934 | 0.14314  |
|   |          |          |          | C                                           | -3.23376 | -1.33472 | 0.30795  |
|   |          |          |          | C                                           | -2.46204 | -2.46812 | 0.46059  |
|   |          |          |          | C                                           | -1.07711 | -2.30951 | 0.4148   |
|   |          |          |          | C                                           | -0.43983 | -1.06597 | 0.28199  |
|   |          |          |          | C                                           | -1.24734 | 0.08627  | 0.15083  |
|   |          |          |          | H                                           | -2.90566 | -3.45669 | 0.56269  |
|   |          |          |          | H                                           | -0.4654  | -3.21073 | 0.45336  |
|   |          |          |          | C                                           | -3.73482 | 0.85674  | -0.17847 |
|   |          |          |          | C                                           | -5.03739 | 0.01247  | -0.08655 |
|   |          |          |          | O                                           | -3.73554 | 2.02762  | -0.48315 |
|   |          |          |          | O                                           | -6.16943 | 0.39806  | -0.24966 |
|   |          |          |          | N                                           | -4.63008 | -1.26716 | 0.225    |
|   |          |          |          | C                                           | -5.5243  | -2.39002 | 0.33836  |
|   |          |          |          | H                                           | -5.32001 | -3.13878 | -0.43886 |
|   |          |          |          | H                                           | -5.43555 | -2.86473 | 1.3243   |
|   |          |          |          | H                                           | -6.54168 | -2.00799 | 0.21134  |
|   |          |          |          | C                                           | -0.62575 | 1.39621  | -0.16124 |
|   |          |          |          | C                                           | -0.94324 | 2.60607  | 0.47904  |
|   |          |          |          | C                                           | -0.29037 | 3.75282  | 0.01831  |
|   |          |          |          | C                                           | 0.91777  | 2.42935  | -1.54118 |
|   |          |          |          | C                                           | 0.62296  | 3.68489  | -1.0215  |
|   |          |          |          | H                                           | -0.51019 | 4.70851  | 0.49558  |
|   |          |          |          | H                                           | 1.65915  | 2.30138  | -2.33181 |
|   |          |          |          | H                                           | 1.11445  | 4.57626  | -1.40483 |
|   |          |          |          | C                                           | -1.86653 | 2.7208   | 1.65264  |
|   |          |          |          | H                                           | -1.45341 | 3.41679  | 2.39406  |

|    |          |          |          |    |          |          |          |
|----|----------|----------|----------|----|----------|----------|----------|
| H  | -2.84529 | 3.1037   | 1.33833  | C  | -4.83429 | -0.74029 | -0.67636 |
| H  | -2.03066 | 1.75648  | 2.14698  | O  | -3.87146 | 1.39192  | -1.34139 |
| N  | 0.33294  | 1.31729  | -1.10751 | O  | -5.95752 | -0.66932 | -1.11089 |
| C  | 2.17773  | -0.27413 | 1.9156   | N  | -4.26547 | -1.80797 | -0.01105 |
| C  | 2.27355  | 0.92964  | 1.22559  | C  | -4.94681 | -3.05261 | 0.23714  |
| C  | 3.7435   | -1.36365 | -0.22275 | H  | -4.44194 | -3.8855  | -0.27036 |
| C  | 3.5748   | 1.57571  | 0.79266  | H  | -4.99704 | -3.26645 | 1.31263  |
| C  | 3.62313  | -0.22747 | -1.01481 | H  | -5.96147 | -2.95102 | -0.15913 |
| C  | 4.05244  | 1.15829  | -0.60641 | C  | -0.78921 | 1.60062  | -0.08354 |
| H  | 3.43967  | 2.66548  | 0.81236  | C  | -1.48767 | 2.77864  | 0.22589  |
| H  | 4.34755  | 1.35933  | 1.54463  | C  | -0.88607 | 3.98803  | -0.1319  |
| H  | 3.64891  | 1.8659   | -1.34241 | C  | 1.02503  | 2.81316  | -0.89972 |
| H  | 5.14946  | 1.2577   | -0.67433 | C  | 0.3558   | 4.01754  | -0.73974 |
| C  | 3.31819  | -1.19544 | 2.27225  | H  | -1.41082 | 4.91706  | 0.0911   |
| H  | 3.79658  | -0.84781 | 3.20444  | H  | 2.03627  | 2.7831   | -1.30291 |
| C  | 4.35837  | -1.36051 | 1.15957  | H  | 0.82607  | 4.95179  | -1.03497 |
| H  | 5.11535  | -0.56621 | 1.21948  | C  | -2.77309 | 2.82075  | 0.99009  |
| H  | 4.90084  | -2.30193 | 1.31621  | H  | -3.63678 | 2.87601  | 0.31704  |
| Rh | 1.6096   | -0.67589 | -0.19414 | H  | -2.89738 | 1.94124  | 1.63165  |
| Cl | 1.1977   | -2.08339 | -2.06088 | H  | -2.78704 | 3.70731  | 1.63552  |
| H  | 1.27222  | -0.4197  | 2.51026  | N  | 0.48398  | 1.64614  | -0.55617 |
| H  | 1.41912  | 1.60291  | 1.3117   | C  | 3.60433  | 0.70502  | -0.34413 |
| H  | 3.63803  | -2.32922 | -0.71839 | C  | 3.28257  | 0.18696  | -1.59731 |
| H  | 3.46248  | -0.38773 | -2.0837  | C  | 2.74038  | -1.78187 | 0.68402  |
| H  | 2.88708  | -2.17965 | 2.50301  | C  | 3.83871  | -1.1119  | -2.14084 |
| H  | 0.96538  | -1.72933 | 0.77452  | C  | 2.18847  | -2.19981 | -0.53516 |
|    |          |          |          | C  | 2.9133   | -2.29967 | -1.85408 |
|    |          |          |          | H  | 3.98244  | -1.021   | -3.22573 |
|    |          |          |          | H  | 4.83959  | -1.28792 | -1.72386 |
|    |          |          |          | H  | 2.1476   | -2.35134 | -2.64133 |
|    |          |          |          | H  | 3.47286  | -3.24994 | -1.91258 |
|    |          |          |          | C  | 4.47593  | 0.058    | 0.70175  |
|    |          |          |          | H  | 5.54233  | 0.23245  | 0.47514  |
|    |          |          |          | C  | 4.20212  | -1.43831 | 0.88841  |
|    |          |          |          | H  | 4.82427  | -2.04019 | 0.2111   |
|    |          |          |          | H  | 4.49903  | -1.72943 | 1.90422  |
|    |          |          |          | Rh | 1.61671  | -0.16971 | -0.19673 |
|    |          |          |          | Cl | 1.03543  | 0.62311  | 2.99962  |
|    |          |          |          | H  | 3.43949  | 1.77265  | -0.1732  |

**53**

**Me<sup>+</sup>TS<sub>AI'-B'</sub>(4)**

|   |          |          |          |    |         |          |          |
|---|----------|----------|----------|----|---------|----------|----------|
| C | -2.5753  | -0.21872 | -0.03936 | H  | 2.1476  | -2.35134 | -2.64133 |
| C | -2.93391 | -1.53717 | 0.31528  | H  | 3.47286 | -3.24994 | -1.91258 |
| C | -2.0265  | -2.41283 | 0.88254  | C  | 4.47593 | 0.058    | 0.70175  |
| C | -0.70782 | -1.97136 | 1.002    | H  | 5.54233 | 0.23245  | 0.47514  |
| C | -0.2806  | -0.69141 | 0.62246  | C  | 4.20212 | -1.43831 | 0.88841  |
| C | -1.2636  | 0.22527  | 0.16985  | H  | 4.82427 | -2.04019 | 0.2111   |
| H | -2.31689 | -3.41832 | 1.1823   | H  | 4.49903 | -1.72943 | 1.90422  |
| H | 0.02505  | -2.66992 | 1.41263  | Rh | 1.61671 | -0.16971 | -0.19673 |
| H | 0.57716  | -0.04611 | 1.74494  | Cl | 1.03543 | 0.62311  | 2.99962  |
| C | -3.72603 | 0.34625  | -0.75015 | H  | 3.43949 | 1.77265  | -0.1732  |

|                             |          |          |          |   |          |          |          |
|-----------------------------|----------|----------|----------|---|----------|----------|----------|
| H                           | 2.87261  | 0.87667  | -2.34051 | H | 0.78189  | 0.003    | -1.41594 |
| H                           | 2.19609  | -2.03624 | 1.59778  | C | -1.22911 | -0.30821 | 2.58157  |
| H                           | 1.26757  | -2.78723 | -0.49692 | C | -0.65145 | 0.75442  | 2.74451  |
| H                           | 4.27448  | 0.57294  | 1.65081  | C | -1.97144 | -1.51927 | 2.45294  |
| <b>88</b><br><b>MeC'(1)</b> |          |          |          | C | -1.4929  | -2.72623 | 2.98473  |
|                             |          |          |          | C | -3.19878 | -1.51531 | 1.77187  |
|                             |          |          |          | C | -2.22323 | -3.89728 | 2.82922  |
|                             |          |          |          | H | -0.54624 | -2.73501 | 3.52454  |
| C                           | -3.59045 | 0.76243  | -1.20131 | C | -3.91593 | -2.6914  | 1.60406  |
| C                           | -3.73194 | 2.15927  | -1.10287 | H | -3.57543 | -0.57505 | 1.37112  |
| C                           | -2.64975 | 2.98394  | -0.85154 | C | -3.43016 | -3.88511 | 2.13347  |
| C                           | -1.41416 | 2.38071  | -0.60326 | H | -1.84601 | -4.82738 | 3.2518   |
| C                           | -1.23655 | 0.99145  | -0.64996 | H | -4.85092 | -2.66661 | 1.04645  |
| C                           | -2.3162  | 0.1754   | -1.05838 | H | -3.99486 | -4.8074  | 2.00705  |
| H                           | -2.76317 | 4.0658   | -0.79117 | C | -0.04202 | 2.01214  | 3.01851  |
| H                           | -0.55866 | 2.99978  | -0.33335 | C | -0.73997 | 3.19932  | 2.75705  |
| C                           | -4.94666 | 0.21686  | -1.16078 | C | 1.25942  | 2.0762   | 3.53222  |
| C                           | -5.8981  | 1.44417  | -1.24124 | C | -0.13835 | 4.42556  | 3.00141  |
| O                           | -5.35104 | -0.91485 | -0.99313 | H | -1.74964 | 3.14139  | 2.35199  |
| O                           | -7.10434 | 1.42612  | -1.30538 | C | 1.85089  | 3.30552  | 3.78035  |
| N                           | -5.07833 | 2.5478   | -1.21076 | H | 1.81044  | 1.15292  | 3.70611  |
| C                           | -5.55351 | 3.90594  | -1.18743 | C | 1.15555  | 4.48137  | 3.51333  |
| H                           | -5.28626 | 4.40294  | -0.24473 | H | -0.68167 | 5.34538  | 2.79084  |
| H                           | -5.13722 | 4.48295  | -2.02355 | H | 2.86817  | 3.3466   | 4.16412  |
| H                           | -6.64329 | 3.87166  | -1.27863 | H | 1.6265   | 5.44557  | 3.69704  |
| C                           | -1.99798 | -1.24839 | -1.20474 | C | 3.77363  | -0.12685 | -1.39795 |
| C                           | -2.63094 | -2.19144 | -2.03431 | C | 3.74386  | 0.51051  | -2.6455  |
| C                           | -2.21206 | -3.5199  | -1.93082 | C | 3.13459  | -0.09055 | -3.73642 |
| C                           | -0.50621 | -2.87311 | -0.41386 | C | 2.54796  | -1.34392 | -3.53845 |
| C                           | -1.18092 | -3.88381 | -1.08261 | C | 2.53435  | -1.96515 | -2.29083 |
| H                           | -2.70494 | -4.26995 | -2.55003 | C | 3.13301  | -1.3377  | -1.19411 |
| H                           | 0.37239  | -3.07493 | 0.19663  | H | 3.10445  | 0.39189  | -4.71152 |
| H                           | -0.86496 | -4.91823 | -0.97487 | H | 2.06761  | -1.8381  | -4.38158 |
| C                           | -3.63712 | -1.85338 | -3.08981 | H | 2.02129  | -2.91765 | -2.15505 |
| H                           | -3.42497 | -2.43818 | -3.99408 | C | 4.51367  | 0.73769  | -0.46816 |
| H                           | -4.65813 | -2.08409 | -2.76596 | C | 4.83541  | 2.01383  | -1.29348 |
| H                           | -3.6095  | -0.79245 | -3.36117 | O | 4.92194  | 0.51502  | 0.6462   |
| N                           | -0.88414 | -1.59851 | -0.49755 | O | 5.40973  | 3.00813  | -0.92787 |
| Rh                          | 0.33415  | -0.00049 | 0.04056  | N | 4.37255  | 1.75309  | -2.57834 |
| Cl                          | 1.74676  | 1.90179  | 0.20996  |   |          |          |          |



|   |         |          |          |    |          |          |          |
|---|---------|----------|----------|----|----------|----------|----------|
| C | 4.4237  | 2.7118   | -3.65048 | C  | -2.04082 | 3.00411  | -3.05787 |
| H | 4.97213 | 2.31129  | -4.51352 | C  | 0.05569  | 2.19737  | -2.28776 |
| H | 3.4121  | 2.99923  | -3.9675  | C  | -0.66113 | 3.07304  | -3.0923  |
| H | 4.94554 | 3.59547  | -3.27106 | H  | -2.63997 | 3.73447  | -3.60247 |
| C | 3.02142 | -1.84715 | 0.19582  | H  | 1.14034  | 2.23394  | -2.17853 |
| C | 3.95102 | -2.75618 | 0.71626  | H  | -0.13871 | 3.82521  | -3.67784 |
| C | 3.81168 | -3.12042 | 2.05199  | C  | -4.19651 | 2.13742  | -2.20732 |
| C | 1.9238  | -1.67531 | 2.21549  | H  | -4.48171 | 3.19738  | -2.21516 |
| C | 2.7955  | -2.56789 | 2.81871  | H  | -4.70379 | 1.64078  | -3.04188 |
| H | 4.51895 | -3.8241  | 2.49144  | H  | -4.58366 | 1.6908   | -1.28352 |
| H | 1.10978 | -1.20886 | 2.77102  | N  | -0.56129 | 1.25949  | -1.56936 |
| H | 2.67824 | -2.81815 | 3.87067  | Rh | 0.40458  | 0.26802  | -0.04645 |
| C | 5.08017 | -3.26617 | -0.12371 | Cl | 2.70179  | 0.86734  | -0.83494 |
| H | 5.60481 | -4.08767 | 0.37813  | H  | 0.52851  | -0.94666 | -0.94665 |
| H | 4.73753 | -3.62356 | -1.10279 | C  | -0.64101 | 2.52677  | 1.62386  |
| H | 5.81243 | -2.46842 | -0.31169 | C  | 0.42374  | 2.96817  | 1.22102  |
| N | 2.01665 | -1.33009 | 0.9248   | C  | -1.89679 | 2.10758  | 2.15523  |

## 88

### MeC'(2)

|   |          |          |          |   |          |          |          |
|---|----------|----------|----------|---|----------|----------|----------|
| C | -3.58376 | -0.74136 | -0.91823 | C | -3.06856 | 2.2629   | 1.39922  |
| C | -3.95852 | -1.66342 | 0.07744  | C | -3.21164 | 1.11279  | 3.92952  |
| C | -3.1543  | -1.92271 | 1.17031  | H | -1.08433 | 1.43051  | 4.03544  |
| C | -1.89314 | -1.31992 | 1.2008   | C | -4.29124 | 1.84411  | 1.90432  |
| C | -1.45909 | -0.41854 | 0.22375  | H | -2.99917 | 2.71176  | 0.40809  |
| C | -2.3691  | -0.03973 | -0.7971  | C | -4.36679 | 1.26082  | 3.16684  |
| H | -3.4627  | -2.61771 | 1.95029  | H | -3.26697 | 0.67004  | 4.92267  |
| H | -1.22367 | -1.57966 | 2.0232   | H | -5.19345 | 1.97172  | 1.30729  |
| C | -4.52567 | -0.93704 | -2.02458 | H | -5.3267  | 0.92905  | 3.55882  |
| C | -5.59655 | -1.93153 | -1.49533 | C | 1.61875  | 3.6202   | 0.79893  |
| O | -4.51489 | -0.53512 | -3.16664 | C | 1.54933  | 4.64683  | -0.15401 |
| O | -6.5888  | -2.30899 | -2.07222 | C | 2.86256  | 3.25074  | 1.327    |
| N | -5.17404 | -2.29488 | -0.23784 | C | 2.70736  | 5.28946  | -0.56795 |
| C | -5.85354 | -3.25126 | 0.59384  | H | 0.57797  | 4.93227  | -0.55712 |
| H | -5.21642 | -4.12295 | 0.79775  | C | 4.01382  | 3.90427  | 0.91472  |
| H | -6.15435 | -2.80129 | 1.54961  | H | 2.91973  | 2.4242   | 2.03357  |
| H | -6.74644 | -3.5766  | 0.05121  | C | 3.9397   | 4.91998  | -0.03377 |
| C | -1.91528 | 1.08071  | -1.63175 | H | 2.64877  | 6.08509  | -1.30888 |
| C | -2.70689 | 2.02499  | -2.31239 | H | 4.97761  | 3.59832  | 1.31594  |
|   |          |          |          | H | 4.84753  | 5.42229  | -0.36355 |
|   |          |          |          | C | 3.06413  | -2.29685 | -0.39465 |

|   |         |          |          |    |          |          |          |
|---|---------|----------|----------|----|----------|----------|----------|
| C | 3.31592 | -2.63245 | -1.73038 | H  | -4.98621 | -0.05549 | -2.14025 |
| C | 2.41116 | -3.39988 | -2.44839 | H  | -2.88172 | -1.37399 | -2.03687 |
| C | 1.24908 | -3.8154  | -1.7908  | C  | -3.39991 | 3.34446  | 0.23181  |
| C | 0.97142 | -3.45275 | -0.47358 | C  | -4.8181  | 3.62814  | -0.33783 |
| C | 1.87991 | -2.65349 | 0.22792  | O  | -2.69724 | 4.21937  | 0.68917  |
| H | 2.5886  | -3.66945 | -3.48769 | O  | -5.43672 | 4.66383  | -0.2666  |
| H | 0.52833 | -4.42367 | -2.33472 | N  | -5.21162 | 2.46066  | -0.94773 |
| H | 0.03087 | -3.74579 | -0.00761 | C  | -6.439   | 2.30934  | -1.68213 |
| C | 4.21086 | -1.52388 | 0.10331  | H  | -6.24284 | 2.1143   | -2.74552 |
| C | 5.12896 | -1.34974 | -1.13617 | H  | -7.04357 | 1.48716  | -1.27677 |
| O | 4.50042 | -1.20634 | 1.23278  | H  | -6.99336 | 3.2478   | -1.58458 |
| O | 6.17765 | -0.76056 | -1.20748 | C  | -0.86912 | 1.35315  | 1.0295   |
| N | 4.52553 | -2.08447 | -2.15293 | C  | -0.82489 | 2.14452  | 2.19335  |
| C | 5.03473 | -2.13834 | -3.49789 | C  | 0.42522  | 2.35995  | 2.78047  |
| H | 5.24549 | -3.17276 | -3.80095 | C  | 1.39172  | 0.779    | 1.31014  |
| H | 4.32165 | -1.69325 | -4.20485 | C  | 1.56002  | 1.71843  | 2.31752  |
| H | 5.96457 | -1.5618  | -3.51476 | H  | 0.48058  | 3.01056  | 3.65417  |
| C | 1.62476 | -2.07722 | 1.56987  | H  | 2.19975  | 0.11532  | 1.01371  |
| C | 1.9423  | -2.79488 | 2.7299   | H  | 2.5407   | 1.86317  | 2.76596  |
| C | 1.7991  | -2.14981 | 3.95341  | C  | -2.03149 | 2.64418  | 2.92641  |
| C | 1.09128 | -0.19017 | 2.79954  | H  | -1.90305 | 2.43746  | 3.99852  |
| C | 1.38836 | -0.82485 | 3.99156  | H  | -2.17915 | 3.72199  | 2.80004  |
| H | 2.04309 | -2.68262 | 4.87228  | H  | -2.94955 | 2.14656  | 2.59525  |
| H | 0.76602 | 0.84837  | 2.7685   | N  | 0.22658  | 0.61276  | 0.68597  |
| H | 1.30081 | -0.28295 | 4.93032  | Rh | -0.0983  | -0.92101 | -0.65601 |
| C | 2.48969 | -4.18535 | 2.63902  | Cl | -0.54679 | -2.5423  | -2.34538 |
| H | 2.58464 | -4.63542 | 3.63392  | H  | 0.16294  | 0.03982  | -1.80847 |
| H | 1.86089 | -4.84043 | 2.02344  | C  | -1.4257  | -2.74612 | 1.22813  |
| H | 3.48785 | -4.17324 | 2.179    | C  | -0.54945 | -2.28264 | 1.94089  |
| N | 1.17392 | -0.80603 | 1.60946  | C  | -2.53137 | -3.29996 | 0.52082  |

**88**

**MeC'(3)**

|   |          |          |          |   |          |          |          |
|---|----------|----------|----------|---|----------|----------|----------|
| C | -3.14079 | 1.9273   | -0.03239 | H | -1.39515 | -4.84854 | -0.45384 |
| C | -4.19881 | 1.49014  | -0.85087 | C | -4.89151 | -3.23159 | -0.00471 |
| C | -4.15503 | 0.28134  | -1.52159 | H | -3.89985 | -1.83745 | 1.31217  |
| C | -2.97354 | -0.45864 | -1.45097 | C | -4.73532 | -4.33557 | -0.83949 |
| C | -1.88553 | -0.056   | -0.66612 | H | -3.35748 | -5.77853 | -1.65346 |
| C | -2.00485 | 1.10483  | 0.13582  | H | -5.86862 | -2.76529 | 0.11249  |

|   |          |          |          |                 |          |          |          |
|---|----------|----------|----------|-----------------|----------|----------|----------|
| H | -5.5936  | -4.73929 | -1.37433 | H               | 6.35997  | -2.09477 | -2.03113 |
| C | 0.29383  | -1.7577  | 2.96742  | H               | 5.36705  | -0.84614 | -2.8112  |
| C | -0.27804 | -0.91256 | 3.93255  | H               | 5.98209  | -0.59454 | -1.16974 |
| C | 1.65507  | -2.08051 | 3.0687   | N               | 2.01308  | -1.85452 | -0.7052  |
| C | 0.49386  | -0.40601 | 4.9683   |                 |          |          |          |
| H | -1.33645 | -0.66484 | 3.85422  | <b>88</b>       |          |          |          |
| C | 2.42159  | -1.56687 | 4.1066   | <b>MeC1'(1)</b> |          |          |          |
| H | 2.1079   | -2.73526 | 2.32523  | C               | -3.72977 | -1.21002 | 0.5203   |
| C | 1.84553  | -0.72978 | 5.05894  | C               | -3.84746 | -1.44752 | 1.90365  |
| H | 0.03726  | 0.2493   | 5.70941  | C               | -2.85172 | -1.0965  | 2.79375  |
| H | 3.47812  | -1.82065 | 4.16974  | C               | -1.6647  | -0.58515 | 2.26103  |
| H | 2.45024  | -0.33081 | 5.87143  | C               | -1.50111 | -0.36288 | 0.8959   |
| C | 3.40315  | 1.20118  | -1.3032  | C               | -2.57961 | -0.57879 | 0.00545  |
| C | 3.13716  | 2.44606  | -1.903   | H               | -2.95376 | -1.27435 | 3.863    |
| C | 2.48619  | 2.53477  | -3.12035 | H               | -0.83592 | -0.37515 | 2.93585  |
| C | 2.09041  | 1.33791  | -3.7234  | C               | -4.81967 | -1.96843 | -0.10894 |
| C | 2.30957  | 0.09935  | -3.12404 | C               | -5.69324 | -2.49952 | 1.06091  |
| C | 2.96095  | 0.01647  | -1.88931 | O               | -5.03374 | -2.2587  | -1.26332 |
| H | 2.28218  | 3.49447  | -3.59056 | O               | -6.72888 | -3.11527 | 0.97514  |
| H | 1.57159  | 1.37587  | -4.6795  | N               | -5.03837 | -2.12527 | 2.21135  |
| H | 1.93197  | -0.81139 | -3.58661 | C               | -5.46127 | -2.49865 | 3.53473  |
| C | 4.10008  | 1.46859  | -0.04723 | H               | -4.74031 | -3.18279 | 4.00338  |
| C | 4.17213  | 3.01808  | 0.0577   | H               | -5.58046 | -1.61392 | 4.17396  |
| O | 4.55172  | 0.71749  | 0.78945  | H               | -6.4258  | -3.00594 | 3.43574  |
| O | 4.6258   | 3.66347  | 0.97121  | C               | -2.37295 | -0.18756 | -1.40144 |
| N | 3.60377  | 3.4978   | -1.10509 | C               | -3.34912 | 0.12677  | -2.36642 |
| C | 3.42554  | 4.89931  | -1.39237 | C               | -2.90374 | 0.30074  | -3.681   |
| H | 3.92944  | 5.17521  | -2.32765 | C               | -0.65632 | 0.03758  | -2.97682 |
| H | 2.35983  | 5.15195  | -1.46806 | C               | -1.56613 | 0.18555  | -4.01685 |
| H | 3.87054  | 5.46022  | -0.56529 | H               | -3.64446 | 0.5258   | -4.4493  |
| C | 3.12087  | -1.31457 | -1.24231 | H               | 0.42212  | 0.01515  | -3.14114 |
| C | 4.35189  | -1.98596 | -1.27924 | H               | -1.22449 | 0.26384  | -5.04564 |
| C | 4.39314  | -3.27341 | -0.75234 | C               | -4.78905 | 0.41251  | -2.07438 |
| C | 2.07759  | -3.1031  | -0.22458 | H               | -5.07706 | 1.34057  | -2.58702 |
| C | 3.24541  | -3.84808 | -0.22561 | H               | -5.44419 | -0.39353 | -2.42306 |
| H | 5.33144  | -3.82789 | -0.77222 | H               | -4.97494 | 0.55233  | -1.00397 |
| H | 1.14468  | -3.50602 | 0.17123  | N               | -1.05955 | -0.08287 | -1.71951 |
| H | 3.24803  | -4.86031 | 0.17133  | Rh              | 0.2155   | 0.18252  | 0.06584  |
| C | 5.57623  | -1.3481  | -1.85809 | H               | 1.04041  | -0.04253 | 1.3696   |

|   |          |          |          |    |          |          |          |
|---|----------|----------|----------|----|----------|----------|----------|
| C | -0.51434 | 2.22214  | 0.24132  | H  | 4.53709  | -5.44951 | 1.06382  |
| C | 0.33039  | 2.00652  | 1.15374  | H  | 2.7774   | -5.21112 | 1.3089   |
| C | -1.64993 | 2.83752  | -0.39755 | H  | 3.38206  | -5.9325  | -0.21055 |
| C | -2.90309 | 2.76663  | 0.23407  | C  | 3.47188  | 0.78668  | -0.77793 |
| C | -1.54744 | 3.51297  | -1.62086 | C  | 4.5266   | 1.46267  | -1.41193 |
| C | -4.01685 | 3.35558  | -0.34898 | C  | 4.19764  | 2.43902  | -2.34465 |
| H | -2.98517 | 2.24619  | 1.18775  | C  | 1.89831  | 1.98488  | -1.94216 |
| C | -2.66798 | 4.09244  | -2.2027  | C  | 2.86466  | 2.70603  | -2.62199 |
| H | -0.57678 | 3.60116  | -2.10588 | H  | 4.99226  | 2.9755   | -2.86347 |
| C | -3.90564 | 4.01452  | -1.5707  | H  | 0.83991  | 2.15552  | -2.13165 |
| H | -4.98142 | 3.29551  | 0.15312  | H  | 2.57491  | 3.45516  | -3.35507 |
| H | -2.57099 | 4.61518  | -3.15279 | C  | 5.952    | 1.09863  | -1.13102 |
| H | -4.7821  | 4.47257  | -2.0263  | H  | 6.63729  | 1.71842  | -1.72077 |
| C | 1.09425  | 2.50668  | 2.2735   | H  | 6.2082   | 1.22029  | -0.07071 |
| C | 1.79271  | 1.69009  | 3.16872  | H  | 6.14299  | 0.04659  | -1.38464 |
| C | 1.10459  | 3.89664  | 2.48043  | N  | 2.17988  | 1.04252  | -1.03544 |
| C | 2.48396  | 2.24608  | 4.239    | Cl | 0.65171  | -2.17797 | -0.21614 |
| H | 1.79908  | 0.61143  | 3.0128   |    |          |          |          |
| C | 1.79753  | 4.44741  | 3.54793  |    |          |          |          |
| H | 0.55742  | 4.53373  | 1.78636  |    |          |          |          |
| C | 2.492    | 3.62384  | 4.43182  | C  | 1.76177  | -2.02301 | 1.14477  |
| H | 3.02257  | 1.59428  | 4.92596  | C  | 1.45291  | -2.02899 | 2.51819  |
| H | 1.79725  | 5.52662  | 3.69135  | C  | 0.20421  | -1.67045 | 2.98489  |
| H | 3.0379   | 4.05708  | 5.26812  | C  | -0.7206  | -1.19193 | 2.05045  |
| C | 3.69155  | -1.61803 | -0.27476 | C  | -0.42798 | -1.08231 | 0.68954  |
| C | 3.86879  | -2.6998  | 0.59808  | C  | 0.79798  | -1.60664 | 0.20653  |
| C | 4.166    | -2.49216 | 1.93504  | H  | -0.03923 | -1.70088 | 4.046    |
| C | 4.28626  | -1.16871 | 2.37077  | H  | -1.69219 | -0.85596 | 2.41269  |
| C | 4.10005  | -0.08725 | 1.5123   | C  | 3.20894  | -2.20311 | 1.05398  |
| C | 3.76781  | -0.31128 | 0.17331  | C  | 3.7079   | -2.37622 | 2.51234  |
| H | 4.29298  | -3.32134 | 2.62822  | O  | 3.97393  | -2.16253 | 0.11366  |
| H | 4.52462  | -0.97792 | 3.41708  | O  | 4.85844  | -2.49084 | 2.87066  |
| H | 4.17551  | 0.93363  | 1.88722  | N  | 2.58348  | -2.33616 | 3.29924  |
| C | 3.35958  | -2.15605 | -1.59969 | C  | 2.61211  | -2.3168  | 4.73798  |
| C | 3.3088   | -3.69454 | -1.39401 | H  | 2.30318  | -1.33336 | 5.12287  |
| O | 3.22126  | -1.59352 | -2.6606  | H  | 1.94783  | -3.08404 | 5.15509  |
| O | 3.04963  | -4.54146 | -2.21168 | H  | 3.64084  | -2.52053 | 5.04995  |
| N | 3.67013  | -3.9071  | -0.06913 | C  | 1.00058  | -1.53269 | -1.24772 |
| C | 3.59054  | -5.19451 | 0.56971  | C  | 1.82759  | -2.33024 | -2.05121 |

**88**

**MeC1'(2)**

|    |          |          |          |   |          |          |          |
|----|----------|----------|----------|---|----------|----------|----------|
| C  | 1.97748  | -1.94339 | -3.39133 | C | 3.76526  | 0.91588  | 0.3559   |
| C  | 0.33121  | -0.25628 | -3.10881 | C | 3.77048  | 0.80561  | 1.73816  |
| C  | 1.28195  | -0.8748  | -3.91719 | C | 2.61442  | 1.20619  | 2.41082  |
| H  | 2.64615  | -2.52782 | -4.02408 | C | 1.51066  | 1.73129  | 1.74038  |
| H  | -0.37269 | 0.48571  | -3.48282 | C | 1.51251  | 1.86405  | 0.34731  |
| H  | 1.41411  | -0.55384 | -4.94617 | H | 4.63587  | 0.42333  | 2.27702  |
| C  | 2.42028  | -3.63998 | -1.63146 | H | 2.58121  | 1.1208   | 3.49717  |
| H  | 2.14821  | -4.40131 | -2.37531 | H | 0.65363  | 2.07936  | 2.31439  |
| H  | 3.51285  | -3.59921 | -1.57323 | C | 2.9784   | 1.39656  | -1.75834 |
| H  | 2.04507  | -3.97766 | -0.66012 | C | 4.40753  | 0.78556  | -1.83171 |
| N  | 0.19719  | -0.59334 | -1.83189 | O | 2.34906  | 1.76589  | -2.72353 |
| Rh | -1.53789 | -0.18157 | -0.72332 | O | 5.05104  | 0.55835  | -2.82687 |
| Cl | -2.82809 | 0.50171  | -2.79099 | N | 4.79474  | 0.58251  | -0.52082 |
| H  | -1.8615  | -1.65457 | -1.02874 | C | 6.06655  | 0.01765  | -0.12877 |
| C  | -3.52022 | -0.68497 | 0.00568  | H | 6.63813  | 0.73426  | 0.47552  |
| C  | -3.13336 | 0.30209  | 0.67744  | H | 5.9146   | -0.91319 | 0.43179  |
| C  | -4.39818 | -1.76609 | -0.3534  | H | 6.61845  | -0.1986  | -1.048   |
| C  | -5.31003 | -2.2018  | 0.62176  | C | 0.44489  | 2.66634  | -0.32144 |
| C  | -4.39814 | -2.37319 | -1.61515 | C | 0.74477  | 4.02226  | -0.55081 |
| C  | -6.19999 | -3.2281  | 0.34024  | C | -0.26798 | 4.82886  | -1.06067 |
| H  | -5.29962 | -1.72865 | 1.60393  | C | -1.71404 | 2.94022  | -1.08336 |
| C  | -5.29438 | -3.39817 | -1.88719 | C | -1.51454 | 4.28925  | -1.32362 |
| H  | -3.71672 | -1.99909 | -2.3781  | H | -0.06823 | 5.88526  | -1.24234 |
| C  | -6.19289 | -3.83081 | -0.91552 | H | -2.66767 | 2.46908  | -1.31094 |
| H  | -6.89957 | -3.56225 | 1.10471  | H | -2.32839 | 4.89412  | -1.71494 |
| H  | -5.29442 | -3.8601  | -2.87295 | C | 2.09669  | 4.60897  | -0.26745 |
| H  | -6.89093 | -4.63651 | -1.13691 | H | 2.04782  | 5.70413  | -0.28341 |
| C  | -3.3518  | 1.32518  | 1.66527  | H | 2.49331  | 4.30297  | 0.70909  |
| C  | -2.33062 | 2.11246  | 2.20783  | H | 2.83168  | 4.30613  | -1.02581 |
| C  | -4.66567 | 1.50693  | 2.13169  | N | -0.75988 | 2.13087  | -0.59447 |
| C  | -2.60984 | 3.04991  | 3.19352  |   |          |          |          |
| H  | -1.31999 | 1.97939  | 1.83249  |   |          |          |          |
| C  | -4.93932 | 2.44578  | 3.11488  |   |          |          |          |
| H  | -5.46392 | 0.90273  | 1.70119  |   |          |          |          |
| C  | -3.91253 | 3.22004  | 3.65229  |   |          |          |          |
| H  | -1.80248 | 3.65498  | 3.60442  |   |          |          |          |
| H  | -5.96216 | 2.5766   | 3.46436  |   |          |          |          |
| H  | -4.12924 | 3.9568   | 4.42381  |   |          |          |          |
| C  | 2.64668  | 1.42211  | -0.33373 |   |          |          |          |

**88**

**MeC1'(3)**

|   |         |         |          |
|---|---------|---------|----------|
| C | 3.34189 | 0.89072 | -0.7449  |
| C | 3.70147 | 0.96081 | -2.10568 |
| C | 2.76499 | 1.14781 | -3.10594 |
| C | 1.42097 | 1.22143 | -2.73746 |
| C | 1.01817 | 1.13695 | -1.40052 |
| C | 1.98678 | 1.04005 | -0.37391 |

|    |          |          |          |   |          |          |          |
|----|----------|----------|----------|---|----------|----------|----------|
| H  | 3.05973  | 1.20091  | -4.1531  | C | -4.24188 | -0.2141  | 0.12995  |
| H  | 0.65652  | 1.3424   | -3.50349 | C | -3.89829 | -1.41544 | 0.76175  |
| C  | 4.52938  | 0.40123  | -0.04628 | C | -5.41303 | -0.15092 | -0.64111 |
| C  | 5.66573  | 0.36947  | -1.10492 | C | -4.71691 | -2.52864 | 0.63953  |
| O  | 4.6944   | -0.02667 | 1.07811  | H | -2.97445 | -1.48718 | 1.33156  |
| O  | 6.82167  | 0.07125  | -0.91643 | C | -6.2278  | -1.269   | -0.75753 |
| N  | 5.07566  | 0.72839  | -2.29132 | H | -5.66835 | 0.78407  | -1.13766 |
| C  | 5.76687  | 0.78662  | -3.55264 | C | -5.88478 | -2.45832 | -0.11613 |
| H  | 5.36533  | 0.04896  | -4.26099 | H | -4.42787 | -3.45519 | 1.1348   |
| H  | 5.68706  | 1.7865   | -3.99876 | H | -7.13919 | -1.21242 | -1.35079 |
| H  | 6.81935  | 0.56048  | -3.35635 | H | -6.53042 | -3.33065 | -0.20632 |
| C  | 1.4396   | 0.97918  | 0.98346  | C | 0.70234  | -2.54837 | 0.75348  |
| C  | 2.07322  | 1.29737  | 2.19894  | C | 2.03689  | -2.52536 | 1.19595  |
| C  | 1.39688  | 0.97204  | 3.37895  | C | 3.0954   | -2.46928 | 0.3083   |
| C  | -0.52028 | 0.36644  | 2.11965  | C | 2.7801   | -2.34553 | -1.04587 |
| C  | 0.11466  | 0.45125  | 3.35261  | C | 1.46237  | -2.28218 | -1.49429 |
| H  | 1.88887  | 1.16905  | 4.33227  | C | 0.39547  | -2.39224 | -0.59655 |
| H  | -1.57646 | 0.11447  | 2.03599  | H | 4.12768  | -2.47801 | 0.6494   |
| H  | -0.40874 | 0.15948  | 4.25919  | H | 3.59001  | -2.28453 | -1.77326 |
| C  | 3.33803  | 2.0922   | 2.31079  | H | 1.25161  | -2.13305 | -2.55254 |
| H  | 3.18889  | 2.88928  | 3.05115  | C | -0.13652 | -2.69368 | 1.9383   |
| H  | 4.18909  | 1.48351  | 2.63457  | C | 0.84732  | -2.63654 | 3.14452  |
| H  | 3.61145  | 2.56766  | 1.36336  | O | -1.33277 | -2.84937 | 2.05366  |
| N  | 0.11475  | 0.63642  | 0.9799   | O | 0.55808  | -2.62218 | 4.31761  |
| Rh | -0.85631 | 1.07625  | -0.8051  | N | 2.10879  | -2.57429 | 2.59322  |
| H  | -0.51697 | 2.53268  | -0.45398 | C | 3.3081   | -2.31131 | 3.354    |
| C  | -2.94236 | 2.05209  | 0.51982  | H | 4.03146  | -3.13023 | 3.25321  |
| C  | -3.4472  | 0.95964  | 0.30517  | H | 3.77145  | -1.37669 | 3.00793  |
| C  | -2.54117 | 3.36722  | 0.92254  | H | 3.01249  | -2.22084 | 4.40379  |
| C  | -2.51812 | 4.41896  | -0.00523 | C | -0.98364 | -2.37728 | -1.1536  |
| C  | -2.19436 | 3.6121   | 2.25782  | C | -1.65502 | -3.59152 | -1.35923 |
| C  | -2.15828 | 5.69352  | 0.40739  | C | -2.82489 | -3.55088 | -2.1144  |
| H  | -2.75442 | 4.20519  | -1.04713 | C | -2.57828 | -1.19022 | -2.31404 |
| C  | -1.83155 | 4.89131  | 2.65897  | C | -3.27972 | -2.34591 | -2.62371 |
| H  | -2.21666 | 2.79046  | 2.97326  | H | -3.36639 | -4.47739 | -2.30922 |
| C  | -1.81475 | 5.93373  | 1.73657  | H | -2.9061  | -0.21142 | -2.66616 |
| H  | -2.13855 | 6.50649  | -0.31624 | H | -4.1799  | -2.28844 | -3.23091 |
| H  | -1.56534 | 5.07668  | 3.69835  | C | -1.14086 | -4.882   | -0.79877 |
| H  | -1.53142 | 6.93623  | 2.05317  | H | -1.70504 | -5.73241 | -1.1995  |

|                 |          |          |          |   |          |          |          |
|-----------------|----------|----------|----------|---|----------|----------|----------|
| H               | -0.0796  | -5.04218 | -1.02981 | C | -2.94394 | -0.16902 | -1.4291  |
| H               | -1.2443  | -4.89954 | 0.29532  | C | -3.06626 | -2.75611 | -0.935   |
| N               | -1.45327 | -1.19419 | -1.58655 | C | -3.538   | -3.16921 | 0.31841  |
| Cl              | -1.82712 | 2.01385  | -2.76156 | C | -2.80781 | -3.70969 | -1.93117 |
|                 |          |          |          | C | -3.7524  | -4.51975 | 0.56545  |
| <b>88</b>       |          |          |          | H | -3.7062  | -2.41569 | 1.08809  |
| <b>MeC1'(4)</b> |          |          |          | C | -3.01648 | -5.05682 | -1.66996 |
| C               | 3.82428  | 0.01022  | -0.43701 | H | -2.43747 | -3.37229 | -2.89864 |
| C               | 4.46062  | -1.24505 | -0.46173 | C | -3.4896  | -5.46507 | -0.42304 |
| C               | 3.79903  | -2.3792  | -0.88779 | H | -4.12035 | -4.8373  | 1.54013  |
| C               | 2.44083  | -2.25321 | -1.19975 | H | -2.81724 | -5.79443 | -2.44567 |
| C               | 1.76129  | -1.03262 | -1.13607 | H | -3.65919 | -6.52256 | -0.22547 |
| C               | 2.48715  | 0.14653  | -0.85793 | C | -3.23266 | 1.21155  | -1.63929 |
| H               | 4.29418  | -3.34798 | -0.93483 | C | -3.94341 | 1.90243  | -0.64396 |
| H               | 1.8923   | -3.14894 | -1.48726 | C | -2.81842 | 1.88916  | -2.79571 |
| C               | 4.71471  | 0.90149  | 0.30527  | C | -4.19601 | 3.2621   | -0.78384 |
| C               | 6.01454  | 0.08573  | 0.55812  | H | -4.29647 | 1.36363  | 0.23492  |
| O               | 4.54372  | 2.01485  | 0.75738  | C | -3.09383 | 3.24333  | -2.93174 |
| O               | 7.0236   | 0.4753   | 1.09679  | H | -2.24171 | 1.34939  | -3.5458  |
| N               | 5.76707  | -1.16833 | 0.05216  | C | -3.77072 | 3.9346   | -1.92754 |
| C               | 6.69607  | -2.26465 | 0.12253  | H | -4.7311  | 3.78522  | 0.0079   |
| H               | 6.30286  | -3.07843 | 0.74748  | H | -2.76485 | 3.76841  | -3.8271  |
| H               | 6.91444  | -2.65969 | -0.87832 | H | -3.97452 | 4.99857  | -2.04209 |
| H               | 7.61874  | -1.88167 | 0.56912  | C | -0.99786 | 1.00849  | 2.20961  |
| C               | 1.7788   | 1.43218  | -0.9851  | C | -0.74202 | 2.38023  | 2.37146  |
| C               | 2.35215  | 2.62529  | -1.46127 | C | 0.54984  | 2.87386  | 2.42086  |
| C               | 1.52423  | 3.74976  | -1.51467 | C | 1.59395  | 1.95224  | 2.30757  |
| C               | -0.30328 | 2.43079  | -0.77581 | C | 1.35322  | 0.58821  | 2.14355  |
| C               | 0.19598  | 3.67565  | -1.14272 | C | 0.04753  | 0.10156  | 2.06309  |
| H               | 1.94184  | 4.68731  | -1.88361 | H | 0.75326  | 3.93744  | 2.5278   |
| H               | -1.36075 | 2.30353  | -0.54799 | H | 2.62326  | 2.30737  | 2.31253  |
| H               | -0.46342 | 4.53982  | -1.18988 | H | 2.18842  | -0.10466 | 2.03723  |
| C               | 3.74391  | 2.75788  | -1.99768 | C | -2.44513 | 0.82643  | 2.19862  |
| H               | 3.74906  | 3.46393  | -2.83723 | C | -3.03008 | 2.25847  | 2.38671  |
| H               | 4.43498  | 3.13769  | -1.23475 | O | -3.12413 | -0.16752 | 2.06583  |
| H               | 4.14116  | 1.80459  | -2.36374 | O | -4.1958  | 2.57154  | 2.44353  |
| N               | 0.45458  | 1.34423  | -0.71392 | N | -1.93969 | 3.10131  | 2.46046  |
| Rh              | -0.20184 | -0.86021 | -1.2129  | C | -2.04372 | 4.5382   | 2.47057  |
| C               | -2.87882 | -1.36433 | -1.18982 | H | -1.53856 | 4.96837  | 3.34465  |

|                 |          |          |          |    |          |          |          |
|-----------------|----------|----------|----------|----|----------|----------|----------|
| H               | -1.60678 | 4.96157  | 1.55495  | C  | 2.89093  | -2.83866 | -3.07988 |
| H               | -3.10838 | 4.78758  | 2.51113  | C  | 0.82558  | -1.77867 | -2.57836 |
| C               | -0.19909 | -1.3569  | 1.93333  | C  | 1.60234  | -2.51512 | -3.46428 |
| C               | -0.30295 | -2.11078 | 3.11351  | H  | 3.49468  | -3.50801 | -3.69373 |
| C               | -0.43391 | -3.48988 | 2.9952   | H  | -0.22449 | -1.54957 | -2.76672 |
| C               | -0.37982 | -3.24704 | 0.62712  | H  | 1.17635  | -2.86812 | -4.39928 |
| C               | -0.45688 | -4.0681  | 1.73713  | C  | 4.78934  | -2.85984 | -1.47909 |
| H               | -0.50999 | -4.10164 | 3.89393  | H  | 4.80825  | -3.94577 | -1.64054 |
| H               | -0.43126 | -3.66725 | -0.37286 | H  | 5.61139  | -2.41575 | -2.05047 |
| H               | -0.55932 | -5.14173 | 1.60046  | H  | 4.98772  | -2.67669 | -0.41742 |
| C               | -0.2837  | -1.45197 | 4.45963  | N  | 1.34443  | -1.31817 | -1.44378 |
| H               | -0.2895  | -2.20237 | 5.25839  | Rh | 0.18442  | -0.52569 | 0.09947  |
| H               | 0.60086  | -0.81678 | 4.59516  | H  | 0.44862  | -1.87376 | 0.85278  |
| H               | -1.16415 | -0.80996 | 4.59984  | C  | -0.98643 | -0.53588 | 1.91511  |
| N               | -0.26308 | -1.90663 | 0.70398  | C  | -0.81594 | 0.67597  | 1.61203  |
| H               | -0.32598 | -2.24456 | -1.8771  | C  | -1.56053 | -1.59756 | 2.70303  |
| Cl              | -0.08262 | -0.12448 | -3.44579 | C  | -2.46635 | -1.23497 | 3.71719  |
|                 |          |          |          | C  | -1.29161 | -2.95929 | 2.51494  |
|                 |          |          |          | C  | -3.07993 | -2.19791 | 4.5036   |
|                 |          |          |          | H  | -2.67202 | -0.1796  | 3.88864  |
| <b>88</b>       |          |          |          | C  | -1.91066 | -3.9212  | 3.30243  |
| <b>MeC1'(5)</b> |          |          |          | H  | -0.58963 | -3.25924 | 1.7395   |
| C               | 4.35557  | -0.14249 | 0.28061  | C  | -2.80905 | -3.54853 | 4.29671  |
| C               | 4.59456  | 0.58287  | 1.46378  | H  | -3.77395 | -1.89136 | 5.28453  |
| C               | 3.58391  | 0.8693   | 2.36033  | H  | -1.68689 | -4.9735  | 3.13453  |
| C               | 2.28237  | 0.50492  | 2.00754  | H  | -3.29397 | -4.30549 | 4.91045  |
| C               | 1.99894  | -0.17089 | 0.82192  | C  | -0.95173 | 2.09227  | 1.84578  |
| C               | 3.05834  | -0.60928 | -0.00964 | C  | -0.12901 | 3.06248  | 1.2586   |
| H               | 3.77775  | 1.4128   | 3.28358  | C  | -1.94791 | 2.51044  | 2.74604  |
| H               | 1.46929  | 0.77841  | 2.67665  | C  | -0.31749 | 4.40792  | 1.5505   |
| C               | 5.57373  | 0.00397  | -0.52894 | H  | 0.63715  | 2.75106  | 0.55431  |
| C               | 6.60639  | 0.71363  | 0.3893   | C  | -2.12977 | 3.85506  | 3.03388  |
| O               | 5.80163  | -0.24503 | -1.69016 | H  | -2.59991 | 1.76603  | 3.20152  |
| O               | 7.75951  | 0.96158  | 0.13089  | C  | -1.31701 | 4.81164  | 2.43065  |
| N               | 5.92965  | 1.00574  | 1.55091  | H  | 0.32844  | 5.14822  | 1.08116  |
| C               | 6.49676  | 1.74352  | 2.64819  | H  | -2.9101  | 4.15725  | 3.73115  |
| H               | 5.96903  | 2.69523  | 2.799    | H  | -1.45962 | 5.86836  | 2.65185  |
| H               | 6.45687  | 1.16185  | 3.57864  | C  | -2.91623 | 0.9643   | -1.60617 |
| H               | 7.54171  | 1.94854  | 2.39583  | C  | -3.05178 | 2.3615   | -1.55901 |
| C               | 2.66967  | -1.43731 | -1.15672 |    |          |          |          |
| C               | 3.45698  | -2.32766 | -1.90677 |    |          |          |          |





|   |          |          |          |                 |          |          |          |
|---|----------|----------|----------|-----------------|----------|----------|----------|
| H | -4.20179 | 0.17917  | 4.84095  | H               | 6.63905  | 0.3584   | 2.86593  |
| C | 0.20018  | 3.63945  | -0.54353 | H               | 5.76692  | -1.18291 | 2.76795  |
| C | -0.63    | 4.77001  | -0.48665 | H               | 6.26658  | -0.36714 | 1.29026  |
| C | 1.41437  | 3.71278  | -1.23786 | N               | 2.32992  | 0.79501  | 1.42226  |
| C | -0.25487 | 5.94744  | -1.11682 |                 |          |          |          |
| H | -1.57313 | 4.70455  | 0.05519  | <b>88</b>       |          |          |          |
| C | 1.78477  | 4.89908  | -1.85992 | <b>MeC1'(7)</b> |          |          |          |
| H | 2.06914  | 2.84153  | -1.2831  | C               | -1.15604 | 1.95473  | 0.39492  |
| C | 0.95471  | 6.01493  | -1.80491 | C               | -2.18403 | 1.89908  | -0.56771 |
| H | -0.90947 | 6.81642  | -1.07332 | C               | -2.28814 | 0.86282  | -1.47819 |
| H | 2.73043  | 4.94546  | -2.39671 | C               | -1.23466 | -0.05269 | -1.50608 |
| H | 1.24839  | 6.9384   | -2.30141 | C               | -0.18813 | -0.02306 | -0.58407 |
| C | 3.83781  | -1.1918  | -0.58352 | C               | -0.20873 | 0.90803  | 0.48362  |
| C | 3.96444  | -2.408   | -1.27282 | H               | -3.10143 | 0.80775  | -2.20022 |
| C | 3.91572  | -3.62043 | -0.60722 | H               | -1.22933 | -0.81607 | -2.28457 |
| C | 3.70576  | -3.58675 | 0.77297  | C               | -1.14367 | 3.34159  | 0.86457  |
| C | 3.56203  | -2.3873  | 1.46547  | C               | -2.43682 | 3.99474  | 0.29821  |
| C | 3.61615  | -1.16666 | 0.78455  | O               | -0.28957 | 3.97343  | 1.44942  |
| H | 4.0035   | -4.56692 | -1.13666 | O               | -2.85583 | 5.10356  | 0.53373  |
| H | 3.64851  | -4.52648 | 1.32046  | N               | -2.98954 | 3.04885  | -0.53096 |
| H | 3.39632  | -2.39319 | 2.5437   | C               | -4.16131 | 3.25128  | -1.34519 |
| C | 3.82484  | -0.11999 | -1.58332 | H               | -3.89939 | 3.25814  | -2.41328 |
| C | 3.93962  | -0.84932 | -2.94907 | H               | -4.89863 | 2.45787  | -1.16417 |
| O | 3.75799  | 1.08076  | -1.4592  | H               | -4.5853  | 4.2223   | -1.07237 |
| O | 3.93071  | -0.3529  | -4.04798 | C               | 0.74026  | 0.65813  | 1.58945  |
| N | 4.08124  | -2.19468 | -2.64619 | C               | 0.67583  | 1.14868  | 2.91313  |
| C | 3.99586  | -3.23363 | -3.63982 | C               | 1.69251  | 0.75184  | 3.78856  |
| H | 4.83047  | -3.93993 | -3.54579 | C               | 2.63674  | -0.63368 | 2.114    |
| H | 3.0448   | -3.77754 | -3.54717 | C               | 2.69887  | -0.11562 | 3.4012   |
| H | 4.04046  | -2.75145 | -4.62073 | H               | 1.66652  | 1.13241  | 4.81065  |
| C | 3.48696  | 0.11871  | 1.516    | H               | 3.35709  | -1.35619 | 1.72215  |
| C | 4.58655  | 0.56601  | 2.27015  | H               | 3.49396  | -0.41048 | 4.08124  |
| C | 4.44651  | 1.76395  | 2.96233  | C               | -0.43012 | 1.97486  | 3.49142  |
| C | 2.23469  | 1.94514  | 2.10269  | H               | -0.56141 | 1.7202   | 4.55185  |
| C | 3.25371  | 2.46439  | 2.88598  | H               | -0.22429 | 3.04891  | 3.4194   |
| H | 5.28093  | 2.1444   | 3.55207  | H               | -1.38499 | 1.79352  | 2.98183  |
| H | 1.29117  | 2.47843  | 2.00872  | N               | 1.68385  | -0.2634  | 1.26769  |
| H | 3.11117  | 3.40641  | 3.4101   | Rh              | 1.52512  | -1.02255 | -0.80416 |
| C | 5.87824  | -0.19495 | 2.30288  | Cl              | 3.75622  | -2.19833 | -0.81482 |

|   |          |          |          |                 |          |          |          |
|---|----------|----------|----------|-----------------|----------|----------|----------|
| H | 1.31387  | -1.42829 | -2.30018 | C               | -4.67789 | 0.79192  | 2.2837   |
| C | 1.92476  | 0.77859  | -1.9691  | H               | -5.05756 | 0.46828  | 3.2607   |
| C | 2.80062  | 0.84267  | -1.08317 | H               | -3.96047 | 1.61367  | 2.42903  |
| C | 1.06301  | 1.35693  | -2.97343 | H               | -5.51397 | 1.14912  | 1.67501  |
| C | 0.57577  | 2.65087  | -2.73698 | C               | -0.61595 | -3.36185 | 0.07777  |
| C | 0.64199  | 0.66411  | -4.11232 | C               | -1.22796 | -4.6126  | -0.11305 |
| C | -0.34147 | 3.22433  | -3.60778 | C               | -0.61222 | -5.513   | -0.97597 |
| H | 0.90728  | 3.18736  | -1.84715 | C               | 1.11332  | -3.91817 | -1.35896 |
| C | -0.26173 | 1.2493   | -4.98916 | C               | 0.57487  | -5.16986 | -1.59785 |
| H | 1.01574  | -0.34405 | -4.28736 | H               | -1.06628 | -6.49052 | -1.13883 |
| C | -0.76612 | 2.52262  | -4.7333  | H               | 2.05783  | -3.61235 | -1.80104 |
| H | -0.72906 | 4.2216   | -3.40301 | H               | 1.09219  | -5.85667 | -2.26257 |
| H | -0.58422 | 0.70245  | -5.87351 | C               | -2.4979  | -4.99478 | 0.58494  |
| H | -1.48776 | 2.96907  | -5.41564 | H               | -2.65473 | -6.07816 | 0.52776  |
| C | 3.78467  | 1.33585  | -0.16448 | H               | -2.49486 | -4.70923 | 1.64403  |
| C | 5.06851  | 0.78202  | -0.07267 | H               | -3.36087 | -4.51004 | 0.10928  |
| C | 3.43091  | 2.41565  | 0.66266  | N               | 0.53404  | -3.01438 | -0.54475 |
| C | 5.97713  | 1.30043  | 0.84033  |                 |          |          |          |
| H | 5.31843  | -0.07185 | -0.69841 |                 |          |          |          |
| C | 4.34738  | 2.92239  | 1.57319  | <b>88</b>       |          |          |          |
| H | 2.42638  | 2.83788  | 0.60216  | <b>MeC1'(8)</b> |          |          |          |
| C | 5.62053  | 2.36483  | 1.66495  | C               | 4.59402  | -0.31377 | -0.3428  |
| H | 6.97222  | 0.86482  | 0.91221  | C               | 4.80236  | 0.04052  | -1.68929 |
| H | 4.06336  | 3.75496  | 2.21457  | C               | 3.83743  | 0.69336  | -2.43098 |
| H | 6.33797  | 2.76278  | 2.38128  | C               | 2.59461  | 0.90755  | -1.82888 |
| C | -2.40842 | -1.80182 | 0.96592  | C               | 2.34163  | 0.54686  | -0.50753 |
| C | -2.8954  | -0.96006 | 1.97901  | C               | 3.381    | 0.01428  | 0.2878   |
| C | -2.24147 | -0.83527 | 3.19298  | H               | 4.00848  | 0.96526  | -3.4715  |
| C | -1.03811 | -1.52735 | 3.34459  | H               | 1.79008  | 1.3254   | -2.43278 |
| C | -0.50352 | -2.30741 | 2.3215   | C               | 5.68799  | -1.22968 | 0.00446  |
| C | -1.18206 | -2.45335 | 1.10848  | C               | 6.65181  | -1.21591 | -1.21423 |
| H | -2.63325 | -0.20928 | 3.99258  | O               | 5.85421  | -1.95334 | 0.95933  |
| H | -0.49338 | -1.4416  | 4.28414  | O               | 7.71033  | -1.78959 | -1.31123 |
| H | 0.4537   | -2.80882 | 2.45796  | N               | 6.04429  | -0.42013 | -2.15732 |
| C | -3.3558  | -1.72586 | -0.14833 | C               | 6.55634  | -0.2117  | -3.48516 |
| C | -4.38507 | -0.63694 | 0.27265  | H               | 5.87326  | -0.62491 | -4.24021 |
| O | -3.42257 | -2.35108 | -1.18157 | H               | 6.7066   | 0.85716  | -3.68795 |
| O | -5.27356 | -0.16923 | -0.3997  | H               | 7.51843  | -0.72929 | -3.54839 |
| N | -4.06536 | -0.30335 | 1.57446  | C               | 3.02     | -0.23211 | 1.68592  |
|   |          |          |          | C               | 3.87222  | -0.28116 | 2.80372  |

|    |          |          |          |    |          |          |          |
|----|----------|----------|----------|----|----------|----------|----------|
| C  | 3.30014  | -0.62005 | 4.03253  | C  | -2.62272 | -2.8897  | -2.45183 |
| C  | 1.14328  | -0.61847 | 3.0431   | C  | -1.46795 | -2.33494 | -2.99759 |
| C  | 1.94074  | -0.84244 | 4.15589  | C  | -1.1295  | -0.99554 | -2.80588 |
| H  | 3.94835  | -0.68206 | 4.90694  | C  | -1.94295 | -0.15868 | -2.04942 |
| H  | 0.05769  | -0.66065 | 3.09374  | H  | -2.86549 | -3.93965 | -2.60027 |
| H  | 1.4881   | -1.11904 | 5.10426  | H  | -0.79339 | -2.96829 | -3.56978 |
| C  | 5.31327  | 0.12402  | 2.79297  | H  | -0.19676 | -0.61121 | -3.2135  |
| H  | 5.52587  | 0.72313  | 3.68791  | C  | -4.20722 | -0.11082 | -0.74494 |
| H  | 5.98026  | -0.74484 | 2.79582  | C  | -5.20465 | -1.27516 | -0.48321 |
| H  | 5.56682  | 0.7283   | 1.91514  | O  | -4.40991 | 1.02898  | -0.38137 |
| N  | 1.66888  | -0.29906 | 1.86261  | O  | -6.25766 | -1.21289 | 0.10515  |
| Rh | 0.54277  | 0.42197  | 0.30441  | N  | -4.65074 | -2.38004 | -1.09373 |
| H  | 0.86059  | 1.8101   | 0.93559  | C  | -5.23359 | -3.6958  | -1.06164 |
| C  | -1.60131 | 1.16276  | 1.59019  | H  | -5.45944 | -4.05315 | -2.07535 |
| C  | -1.79493 | -0.04892 | 1.52508  | H  | -4.55726 | -4.40713 | -0.56869 |
| C  | -1.60611 | 2.5914   | 1.71894  | H  | -6.16419 | -3.62566 | -0.49006 |
| C  | -2.62204 | 3.3279   | 1.09492  | C  | -1.57936 | 1.27518  | -1.9326  |
| C  | -0.63476 | 3.26201  | 2.478    | C  | -2.31305 | 2.22143  | -2.67464 |
| C  | -2.64387 | 4.71367  | 1.20977  | C  | -1.87898 | 3.54108  | -2.66362 |
| H  | -3.37852 | 2.79773  | 0.51836  | C  | -0.08383 | 2.90318  | -1.24125 |
| C  | -0.66468 | 4.64412  | 2.58443  | C  | -0.74537 | 3.88892  | -1.94595 |
| H  | 0.14605  | 2.68413  | 2.97143  | H  | -2.42862 | 4.2899   | -3.23383 |
| C  | -1.66489 | 5.37486  | 1.94419  | H  | 0.80408  | 3.13704  | -0.66141 |
| H  | -3.43345 | 5.27874  | 0.71665  | H  | -0.37503 | 4.91041  | -1.91889 |
| H  | 0.09584  | 5.15654  | 3.17117  | C  | -3.52169 | 1.83726  | -3.47167 |
| H  | -1.68407 | 6.46033  | 2.02805  | H  | -3.75933 | 2.61377  | -4.20803 |
| C  | -2.43209 | -1.31864 | 1.75602  | H  | -3.37924 | 0.89001  | -4.00548 |
| C  | -1.80451 | -2.55523 | 1.56029  | H  | -4.39467 | 1.72164  | -2.81567 |
| C  | -3.7547  | -1.28224 | 2.23528  | N  | -0.4836  | 1.61379  | -1.21549 |
| C  | -2.48999 | -3.72822 | 1.85392  | Cl | 0.70416  | -2.00083 | -0.59351 |
| H  | -0.79995 | -2.58458 | 1.13773  |    |          |          |          |
| C  | -4.42737 | -2.46095 | 2.52673  |    |          |          |          |
| H  | -4.24884 | -0.31863 | 2.35876  |    |          |          |          |
| C  | -3.79379 | -3.68779 | 2.34295  |    |          |          |          |
| H  | -1.99442 | -4.68528 | 1.69714  |    |          |          |          |
| H  | -5.45679 | -2.4163  | 2.87741  |    |          |          |          |
| H  | -4.32089 | -4.61292 | 2.57418  |    |          |          |          |
| C  | -3.11871 | -0.6974  | -1.51432 |    |          |          |          |
| C  | -3.43609 | -2.05299 | -1.70713 |    |          |          |          |

**88**

**MeC1'(9)**

|   |         |         |          |
|---|---------|---------|----------|
| C | 2.87002 | 0.83208 | -1.3558  |
| C | 3.2964  | 1.87912 | -0.51295 |
| C | 2.45588 | 2.46641 | 0.41313  |
| C | 1.11877 | 2.06383 | 0.39929  |
| C | 0.66602 | 1.01577 | -0.40184 |
| C | 1.5722  | 0.28586 | -1.21483 |

|    |          |          |          |   |          |          |          |
|----|----------|----------|----------|---|----------|----------|----------|
| H  | 2.79839  | 3.25069  | 1.08626  | C | -3.94014 | -1.82008 | -0.65509 |
| H  | 0.41542  | 2.56909  | 1.0584   | C | -4.37338 | -2.48952 | -1.81005 |
| C  | 3.88267  | 0.77029  | -2.42024 | C | -3.4681  | -2.57101 | 0.43274  |
| C  | 5.06808  | 1.64891  | -1.93068 | C | -4.30728 | -3.87565 | -1.8828  |
| O  | 3.85187  | 0.2755   | -3.52379 | H | -4.73876 | -1.90324 | -2.65116 |
| O  | 6.15747  | 1.75215  | -2.44485 | C | -3.40508 | -3.95574 | 0.35112  |
| N  | 4.61698  | 2.26863  | -0.79273 | H | -3.14386 | -2.05349 | 1.33542  |
| C  | 5.38181  | 3.20407  | -0.00644 | C | -3.81603 | -4.61189 | -0.8076  |
| H  | 4.93101  | 4.20528  | -0.03888 | H | -4.63915 | -4.3835  | -2.7867  |
| H  | 5.4417   | 2.87137  | 1.0392   | H | -3.0362  | -4.52902 | 1.2008   |
| H  | 6.38455  | 3.2499   | -0.44206 | H | -3.7621  | -5.6974  | -0.8684  |
| C  | 1.08908  | -0.99912 | -1.759   | C | 1.78841  | -0.80727 | 2.08294  |
| C  | 1.85929  | -2.06416 | -2.2843  | C | 2.97464  | -1.39712 | 1.61872  |
| C  | 1.16845  | -3.1785  | -2.7732  | C | 2.95943  | -2.61912 | 0.9676   |
| C  | -0.87338 | -2.23498 | -2.05734 | C | 1.71388  | -3.21055 | 0.741    |
| C  | -0.20791 | -3.26501 | -2.70718 | C | 0.52362  | -2.61192 | 1.15155  |
| H  | 1.75029  | -3.99707 | -3.19926 | C | 0.54951  | -1.39151 | 1.82973  |
| H  | -1.94819 | -2.27051 | -1.90389 | H | 3.8757   | -3.09624 | 0.62498  |
| H  | -0.75644 | -4.11924 | -3.09752 | H | 1.67247  | -4.16554 | 0.21851  |
| C  | 3.35178  | -2.17624 | -2.28071 | H | -0.43322 | -3.09185 | 0.94347  |
| H  | 3.63378  | -3.223   | -2.10069 | C | 2.16024  | 0.42084  | 2.79187  |
| H  | 3.79313  | -1.86093 | -3.23245 | C | 3.69541  | 0.55552  | 2.57492  |
| H  | 3.81003  | -1.56172 | -1.4985  | O | 1.50164  | 1.18222  | 3.46077  |
| N  | -0.24627 | -1.17176 | -1.5777  | O | 4.40563  | 1.47351  | 2.91062  |
| Rh | -1.23723 | 0.57355  | -0.5074  | N | 4.08415  | -0.59667 | 1.91797  |
| Cl | -1.33742 | 1.4612   | -2.6842  | C | 5.42355  | -0.82497 | 1.43709  |
| C  | -4.14064 | 0.8149   | -0.61972 | H | 5.82812  | -1.76809 | 1.82584  |
| C  | -3.97606 | -0.39379 | -0.60602 | H | 5.44889  | -0.84847 | 0.33837  |
| C  | -4.51779 | 2.18859  | -0.48762 | H | 6.04476  | 0.00343  | 1.7909   |
| C  | -5.34592 | 2.55121  | 0.58709  | C | -0.68671 | -0.77808 | 2.37996  |
| C  | -4.10124 | 3.16543  | -1.40226 | C | -1.02202 | -1.08064 | 3.71192  |
| C  | -5.75032 | 3.86991  | 0.74379  | C | -2.15533 | -0.48463 | 4.25133  |
| H  | -5.67325 | 1.78132  | 1.28674  | C | -2.48767 | 0.64843  | 2.18405  |
| C  | -4.51474 | 4.48013  | -1.23647 | C | -2.89004 | 0.40443  | 3.48283  |
| H  | -3.43176 | 2.87694  | -2.21199 | H | -2.44036 | -0.70453 | 5.27993  |
| C  | -5.3357  | 4.83603  | -0.16892 | H | -3.03381 | 1.34865  | 1.56128  |
| H  | -6.39259 | 4.14405  | 1.57903  | H | -3.76413 | 0.91668  | 3.87752  |
| H  | -4.18482 | 5.23663  | -1.94614 | C | -0.16756 | -1.98511 | 4.54772  |
| H  | -5.65285 | 5.87049  | -0.04697 | H | -0.68588 | -2.25756 | 5.4743   |

|                  |          |          |          |   |          |          |          |
|------------------|----------|----------|----------|---|----------|----------|----------|
| H                | 0.1026   | -2.90917 | 4.02208  | H | -3.21046 | 1.04858  | 0.04148  |
| H                | 0.77014  | -1.48563 | 4.8279   | C | -3.29834 | -1.00933 | -0.24436 |
| N                | -1.42364 | 0.04849  | 1.60997  | C | -2.22643 | -1.54852 | -0.6378  |
| H                | -1.64018 | 1.99259  | -0.00261 | C | -4.72117 | -0.97004 | 0.00306  |
|                  |          |          |          | C | -5.59652 | -0.66219 | -1.04561 |
| <b>88</b>        |          |          |          | C | -5.23457 | -1.26221 | 1.27127  |
| <b>MeC1'(10)</b> |          |          |          | C | -6.96622 | -0.65536 | -0.82239 |
| C                | 1.9514   | -1.64603 | 0.18489  | H | -5.17762 | -0.42253 | -2.02225 |
| C                | 2.67771  | -1.43931 | -1.00674 | C | -6.60758 | -1.25016 | 1.48709  |
| C                | 2.26211  | -0.55306 | -1.98612 | H | -4.54568 | -1.50914 | 2.07971  |
| C                | 1.00797  | 0.03901  | -1.81301 | C | -7.47516 | -0.94779 | 0.44196  |
| C                | 0.27088  | -0.10552 | -0.63888 | H | -7.64413 | -0.42137 | -1.64156 |
| C                | 0.79813  | -0.8617  | 0.43132  | H | -7.00222 | -1.48365 | 2.47476  |
| H                | 2.84939  | -0.38222 | -2.88752 | H | -8.55065 | -0.94141 | 0.61138  |
| H                | 0.58483  | 0.63472  | -2.62454 | C | -1.39489 | -2.66502 | -1.01265 |
| C                | 2.46559  | -2.90386 | 0.73437  | C | -1.09395 | -3.65575 | -0.06992 |
| C                | 3.73337  | -3.24533 | -0.09742 | C | -0.85618 | -2.74805 | -2.30306 |
| O                | 2.01033  | -3.65794 | 1.56747  | C | -0.28003 | -4.72649 | -0.41804 |
| O                | 4.50798  | -4.15275 | 0.09831  | H | -1.49449 | -3.56783 | 0.94017  |
| N                | 3.78328  | -2.3023  | -1.09493 | C | -0.03845 | -3.8181  | -2.64001 |
| C                | 4.74847  | -2.28739 | -2.16507 | H | -1.08422 | -1.95991 | -3.01966 |
| H                | 4.2683   | -2.50602 | -3.12909 | C | 0.25187  | -4.80773 | -1.70197 |
| H                | 5.24119  | -1.3078  | -2.2312  | H | -0.04388 | -5.48784 | 0.32237  |
| H                | 5.48965  | -3.06286 | -1.94942 | H | 0.37889  | -3.88003 | -3.64407 |
| C                | 0.06766  | -0.72315 | 1.70499  | H | 0.8951   | -5.64402 | -1.97145 |
| C                | 0.51882  | -1.02962 | 3.0111   | C | 2.2032   | 2.3136   | 0.31491  |
| C                | -0.35697 | -0.8043  | 4.0753   | C | 3.17016  | 1.70766  | 1.13346  |
| C                | -1.95492 | 0.12072  | 2.59864  | C | 2.96431  | 1.53707  | 2.49222  |
| C                | -1.61123 | -0.25112 | 3.88689  | C | 1.73126  | 1.94151  | 3.00795  |
| H                | -0.01839 | -1.05561 | 5.08105  | C | 0.74064  | 2.49235  | 2.19797  |
| H                | -2.89964 | 0.608    | 2.36411  | C | 0.96314  | 2.68446  | 0.83124  |
| H                | -2.29468 | -0.0762  | 4.71349  | H | 3.72442  | 1.09659  | 3.13504  |
| C                | 1.89444  | -1.49139 | 3.37577  | H | 1.53714  | 1.81567  | 4.07296  |
| H                | 2.18044  | -1.04886 | 4.33955  | H | -0.21543 | 2.79274  | 2.6256   |
| H                | 1.94823  | -2.58114 | 3.46598  | C | 2.77235  | 2.39803  | -1.03492 |
| H                | 2.64013  | -1.19263 | 2.63282  | C | 4.14043  | 1.66042  | -0.93993 |
| N                | -1.1397  | -0.09362 | 1.56492  | O | 2.36788  | 2.94224  | -2.03442 |
| Rh               | -1.71073 | 0.47271  | -0.3385  | O | 4.90782  | 1.41434  | -1.83994 |
| Cl               | -2.17249 | 0.78732  | -2.67719 | N | 4.30234  | 1.34369  | 0.39555  |

|   |          |         |          |    |          |          |          |
|---|----------|---------|----------|----|----------|----------|----------|
| C | 5.39092  | 0.54532 | 0.89846  | C  | -0.23784 | -0.38219 | 3.55531  |
| H | 5.9291   | 1.06799 | 1.69953  | C  | -1.27285 | -1.51642 | 1.75126  |
| H | 5.02767  | -0.4196 | 1.28225  | C  | -0.96833 | -1.46466 | 3.10596  |
| H | 6.07683  | 0.3644  | 0.06518  | H  | -0.07394 | -0.23752 | 4.62343  |
| C | -0.07142 | 3.38023 | 0.02171  | H  | -1.94637 | -2.26212 | 1.33569  |
| C | 0.12858  | 4.74368 | -0.25906 | H  | -1.35305 | -2.22058 | 3.78389  |
| C | -0.88714 | 5.42284 | -0.92159 | C  | 0.85565  | 1.82616  | 3.25066  |
| C | -2.15655 | 3.41014 | -0.96706 | H  | 0.17964  | 2.18698  | 4.03848  |
| C | -2.04587 | 4.75372 | -1.2756  | H  | 1.84226  | 1.66616  | 3.69804  |
| H | -0.76282 | 6.48187 | -1.14798 | H  | 0.95411  | 2.62266  | 2.50391  |
| H | -3.03845 | 2.84469 | -1.24705 | N  | -0.77055 | -0.63444 | 0.89252  |
| H | -2.86227 | 5.25607 | -1.78793 | Rh | -1.67979 | -0.26328 | -0.93715 |
| C | 1.38699  | 5.46258 | 0.12431  | Cl | -2.60694 | 0.38966  | -3.04263 |
| H | 1.22704  | 6.54713 | 0.10998  | H  | -2.90582 | -1.36199 | -0.78189 |
| H | 1.74059  | 5.18678 | 1.12524  | C  | -3.31682 | 0.48368  | 0.20929  |
| H | 2.19504  | 5.24083 | -0.58569 | C  | -2.62528 | 1.48506  | -0.12741 |
| N | -1.19262 | 2.71968 | -0.32927 | C  | -4.40213 | -0.03641 | 1.01049  |

## 88

### MeC1'(11)

|   |          |         |          |   |          |          |          |
|---|----------|---------|----------|---|----------|----------|----------|
| C | 1.92921  | 1.76173 | 0.19685  | C | -5.85459 | 0.32136  | 2.91785  |
| C | 2.35118  | 2.47376 | -0.94071 | H | -4.285   | 1.67395  | 2.31386  |
| C | 1.57795  | 2.55551 | -2.08487 | C | -6.11782 | -1.64902 | 1.55914  |
| C | 0.4063   | 1.79382 | -2.12266 | H | -4.7413  | -1.84211 | -0.09612 |
| C | -0.02158 | 1.01884 | -1.04407 | C | -6.51435 | -0.87453 | 2.64562  |
| C | 0.69325  | 1.08109 | 0.16891  | H | -6.15524 | 0.93138  | 3.76822  |
| H | 1.90125  | 3.13882 | -2.94656 | H | -6.62968 | -2.58491 | 1.34084  |
| H | -0.20053 | 1.7876  | -3.03145 | H | -7.33398 | -1.2037  | 3.28217  |
| C | 3.09262  | 1.65927 | 1.06852  | C | -2.20774 | 2.85709  | -0.23672 |
| C | 4.22696  | 2.44355 | 0.35744  | C | -2.3991  | 3.57139  | -1.4269  |
| O | 3.28131  | 1.04821 | 2.10131  | C | -1.55445 | 3.47098  | 0.83989  |
| O | 5.37719  | 2.53875 | 0.72463  | C | -1.93007 | 4.87382  | -1.53254 |
| N | 3.66418  | 2.96397 | -0.78159 | H | -2.88774 | 3.07161  | -2.26228 |
| C | 4.41629  | 3.6357  | -1.80849 | C | -1.07138 | 4.76699  | 0.7184   |
| H | 4.45274  | 3.03127 | -2.72715 | H | -1.41302 | 2.90963  | 1.76467  |
| H | 3.97538  | 4.61193 | -2.04651 | C | -1.2583  | 5.47142  | -0.4684  |
| H | 5.43267  | 3.77946 | -1.42968 | H | -2.08177 | 5.42496  | -2.45932 |
| C | 0.10882  | 0.33481 | 1.29376  | H | -0.55272 | 5.23162  | 1.55623  |
| C | 0.2867   | 0.56741 | 2.66888  | H | -0.88122 | 6.48855  | -0.56322 |
|   |          |         |          | C | 2.24572  | -2.01265 | 0.04573  |

|   |          |          |          |    |          |          |          |
|---|----------|----------|----------|----|----------|----------|----------|
| C | 3.50718  | -1.44412 | 0.30759  | H  | -1.28411 | 4.35151  | -0.60625 |
| C | 4.16469  | -0.68297 | -0.64533 | H  | 0.70826  | 2.97475  | -0.28626 |
| C | 3.50035  | -0.46704 | -1.85629 | C  | -3.96973 | 0.91207  | -1.41391 |
| C | 2.25577  | -1.02995 | -2.13043 | C  | -4.75276 | 2.24228  | -1.23637 |
| C | 1.61527  | -1.83692 | -1.18387 | O  | -4.5345  | -0.16345 | -1.44213 |
| H | 5.14774  | -0.25428 | -0.45543 | O  | -5.95415 | 2.37074  | -1.17253 |
| H | 3.9791   | 0.14894  | -2.61746 | N  | -3.79844 | 3.22275  | -1.12865 |
| H | 1.77761  | -0.86655 | -3.0952  | C  | -4.08815 | 4.59982  | -0.83193 |
| C | 1.8388   | -2.72519 | 1.25239  | H  | -3.69619 | 4.88136  | 0.15676  |
| C | 2.98143  | -2.47369 | 2.27701  | H  | -3.65118 | 5.26747  | -1.58559 |
| O | 0.85807  | -3.40093 | 1.47651  | H  | -5.17636 | 4.71418  | -0.83423 |
| O | 3.0195   | -2.84376 | 3.42512  | C  | -1.29929 | -0.9193  | -1.68611 |
| N | 3.94604  | -1.7611  | 1.59221  | C  | -2.07434 | -1.58805 | -2.65187 |
| C | 5.18866  | -1.30995 | 2.17576  | C  | -1.93674 | -2.97589 | -2.73349 |
| H | 6.04468  | -1.78234 | 1.67602  | C  | -0.16837 | -2.90733 | -1.15974 |
| H | 5.26846  | -0.21824 | 2.10926  | C  | -1.02935 | -3.66014 | -1.9446  |
| H | 5.17672  | -1.60663 | 3.2285   | H  | -2.55013 | -3.51552 | -3.45555 |
| C | 0.4506   | -2.64111 | -1.64236 | H  | 0.64419  | -3.36178 | -0.59968 |
| C | 0.69519  | -3.99429 | -1.95182 | H  | -0.93655 | -4.74174 | -1.97939 |
| C | -0.30319 | -4.69487 | -2.61859 | C  | -2.92687 | -0.90872 | -3.67862 |
| C | -1.6428  | -2.72917 | -2.6272  | H  | -2.74339 | -1.37127 | -4.65693 |
| C | -1.47316 | -4.05212 | -2.99038 | H  | -3.99494 | -1.00297 | -3.45318 |
| H | -0.13948 | -5.7423  | -2.87248 | H  | -2.69291 | 0.15758  | -3.76594 |
| H | -2.53648 | -2.17199 | -2.89491 | N  | -0.29198 | -1.58339 | -1.05643 |
| H | -2.25411 | -4.56331 | -3.54732 | Rh | 1.37993  | -0.35381 | -0.57413 |
| C | 1.98965  | -4.67395 | -1.6174  | C  | 3.47718  | 0.05356  | -0.56207 |
| H | 2.0537   | -5.64302 | -2.1258  | C  | 2.89131  | 1.06523  | -0.08112 |
| H | 2.86117  | -4.077   | -1.91628 | C  | 4.70453  | -0.59756 | -0.95177 |
| H | 2.0739   | -4.86362 | -0.53892 | C  | 5.90306  | 0.07659  | -0.66387 |
| N | -0.71648 | -2.03812 | -1.93558 | C  | 4.75986  | -1.83732 | -1.59458 |
|   |          |          |          | C  | 7.12463  | -0.48954 | -0.9951  |
|   |          |          |          | H  | 5.85575  | 1.04973  | -0.1743  |
|   |          |          |          | C  | 5.98727  | -2.39816 | -1.92673 |
|   |          |          |          | H  | 3.82582  | -2.33811 | -1.84624 |
|   |          |          |          | C  | 7.17078  | -1.73189 | -1.62544 |
|   |          |          |          | H  | 8.04655  | 0.04031  | -0.76052 |
|   |          |          |          | H  | 6.01761  | -3.3624  | -2.4313  |
|   |          |          |          | H  | 8.1299   | -2.17628 | -1.88626 |
|   |          |          |          | C  | 2.86037  | 2.39229  | 0.46952  |

**88**

**MeC1'(12)**

|   |          |         |          |   |         |          |          |
|---|----------|---------|----------|---|---------|----------|----------|
| C | -2.5562  | 1.27064 | -1.39296 | H | 3.82582 | -2.33811 | -1.84624 |
| C | -2.51246 | 2.64893 | -1.11571 | C | 7.17078 | -1.73189 | -1.62544 |
| C | -1.33158 | 3.27749 | -0.78299 | H | 8.04655 | 0.04031  | -0.76052 |
| C | -0.20177 | 2.47054 | -0.60673 | H | 6.01761 | -3.3624  | -2.4313  |
| C | -0.19585 | 1.08337 | -0.79264 | H | 8.1299  | -2.17628 | -1.88626 |
| C | -1.3742  | 0.50217 | -1.31691 | C | 2.86037 | 2.39229  | 0.46952  |



|   |          |          |          |                  |          |          |          |
|---|----------|----------|----------|------------------|----------|----------|----------|
| C | 2.35492  | 2.63734  | 1.75506  | H                | -1.3646  | -1.2662  | 4.70452  |
| C | 3.33283  | 3.46646  | -0.29702 | N                | 1.35487  | -0.77515 | 1.60041  |
| C | 2.318    | 3.93162  | 2.25551  | Cl               | 1.64116  | -0.07192 | -2.90916 |
| H | 1.98846  | 1.80053  | 2.35209  | H                | 2.31503  | -1.68994 | -0.65898 |
| C | 3.28838  | 4.75986  | 0.20905  |                  |          |          |          |
| H | 3.71073  | 3.26705  | -1.2991  | <b>88</b>        |          |          |          |
| C | 2.77859  | 4.9964   | 1.48309  | <b>MeC1'(13)</b> |          |          |          |
| H | 1.92651  | 4.11327  | 3.25551  | C                | 3.55867  | -0.72681 | -0.13169 |
| H | 3.64898  | 5.5892   | -0.3971  | C                | 3.90322  | 0.61954  | -0.3522  |
| H | 2.7413   | 6.01092  | 1.87627  | C                | 2.93431  | 1.59312  | -0.47907 |
| C | -1.89441 | -1.17712 | 1.7551   | C                | 1.59828  | 1.17504  | -0.50382 |
| C | -3.24572 | -0.89652 | 1.4911   | C                | 1.18921  | -0.15772 | -0.38297 |
| C | -3.73552 | 0.39497  | 1.60042  | C                | 2.19877  | -1.09824 | -0.07752 |
| C | -2.81974 | 1.40283  | 1.91925  | H                | 3.18991  | 2.6439   | -0.62305 |
| C | -1.46957 | 1.13984  | 2.14962  | H                | 0.85217  | 1.95613  | -0.64987 |
| C | -0.99091 | -0.16907 | 2.07209  | C                | 4.80045  | -1.49195 | -0.26704 |
| H | -4.78296 | 0.62585  | 1.41101  | C                | 5.92728  | -0.43713 | -0.45652 |
| H | -3.17492 | 2.43119  | 1.9894   | O                | 5.01652  | -2.68375 | -0.29773 |
| H | -0.78149 | 1.95288  | 2.38263  | O                | 7.11193  | -0.64836 | -0.56804 |
| C | -1.7159  | -2.62308 | 1.65008  | N                | 5.29467  | 0.78434  | -0.46849 |
| C | -3.10234 | -3.16209 | 1.19414  | C                | 5.96062  | 2.03119  | -0.7302  |
| O | -0.75285 | -3.31892 | 1.88014  | H                | 5.59636  | 2.48301  | -1.6633  |
| O | -3.39065 | -4.30738 | 0.94442  | H                | 5.80834  | 2.74444  | 0.09133  |
| N | -3.93883 | -2.06218 | 1.15556  | H                | 7.0293   | 1.81644  | -0.8264  |
| C | -5.34822 | -2.13664 | 0.84076  | C                | 1.73268  | -2.45211 | 0.25242  |
| H | -5.95365 | -1.84562 | 1.7098   | C                | 2.3383   | -3.35691 | 1.14908  |
| H | -5.58508 | -1.48986 | -0.01179 | C                | 1.78793  | -4.6346  | 1.2484   |
| H | -5.56483 | -3.17853 | 0.58718  | C                | 0.04262  | -4.00546 | -0.22634 |
| C | 0.37703  | -0.55565 | 2.50145  | C                | 0.66915  | -4.99349 | 0.51609  |
| C | 0.56207  | -0.75941 | 3.8826   | H                | 2.25536  | -5.3515  | 1.9241   |
| C | 1.79906  | -1.21966 | 4.31547  | H                | -0.88344 | -4.18694 | -0.76546 |
| C | 2.5291   | -1.25609 | 2.05176  | H                | 0.25359  | -5.99678 | 0.55627  |
| C | 2.79193  | -1.48777 | 3.38813  | C                | 3.46089  | -3.00586 | 2.07748  |
| H | 1.96804  | -1.3888  | 5.37876  | H                | 3.26497  | -3.43655 | 3.06852  |
| H | 3.28685  | -1.45449 | 1.30104  | H                | 4.41808  | -3.39919 | 1.71703  |
| H | 3.76264  | -1.87571 | 3.68523  | H                | 3.57685  | -1.92158 | 2.18996  |
| C | -0.55091 | -0.54491 | 4.8648   | N                | 0.53616  | -2.76846 | -0.30932 |
| H | -0.18799 | -0.67571 | 5.89066  | Rh               | -0.63485 | -1.16872 | -1.00358 |
| H | -0.99411 | 0.45491  | 4.78351  | C                | -2.46037 | -0.12261 | -1.64796 |

|   |          |          |          |                  |          |          |          |
|---|----------|----------|----------|------------------|----------|----------|----------|
| C | -1.52305 | 0.69158  | -1.8095  | H                | 2.03731  | 4.68423  | 1.11511  |
| C | -3.83089 | -0.54825 | -1.52278 | H                | 0.70895  | 5.83237  | 1.45329  |
| C | -4.3328  | -1.6658  | -2.20188 | C                | -1.73122 | -0.51929 | 2.01026  |
| C | -4.6751  | 0.18189  | -0.67397 | C                | -2.69428 | -0.56617 | 3.03332  |
| C | -5.65724 | -2.04314 | -2.03631 | C                | -3.7248  | -1.49159 | 2.9148   |
| H | -3.66324 | -2.2334  | -2.84757 | C                | -2.78793 | -2.21056 | 0.85207  |
| C | -6.00042 | -0.20655 | -0.51143 | C                | -3.76467 | -2.34005 | 1.82086  |
| H | -4.2736  | 1.0379   | -0.13015 | H                | -4.48637 | -1.54831 | 3.69234  |
| C | -6.4938  | -1.31807 | -1.18759 | H                | -2.80228 | -2.82899 | -0.04011 |
| H | -6.04223 | -2.9093  | -2.57222 | H                | -4.54983 | -3.08146 | 1.69569  |
| H | -6.64913 | 0.36404  | 0.15133  | C                | -2.62766 | 0.3528   | 4.21473  |
| H | -7.53123 | -1.62166 | -1.05585 | H                | -3.33239 | 0.03478  | 4.99149  |
| C | -0.94841 | 1.9483   | -2.2175  | H                | -1.62438 | 0.38713  | 4.6575   |
| C | 0.1117   | 2.01763  | -3.13298 | H                | -2.89443 | 1.37778  | 3.92396  |
| C | -1.46338 | 3.13325  | -1.67135 | N                | -1.79217 | -1.30593 | 0.91822  |
| C | 0.66052  | 3.2486   | -3.4637  | H                | -1.70371 | -2.22203 | -1.61774 |
| H | 0.5073   | 1.09028  | -3.54384 | Cl               | 0.37282  | -1.41723 | -3.11881 |
| C | -0.89605 | 4.36131  | -1.99704 |                  |          |          |          |
| H | -2.32185 | 3.08598  | -1.00186 | <b>88</b>        |          |          |          |
| C | 0.1721   | 4.4201   | -2.8873  | <b>MeC1'(14)</b> |          |          |          |
| H | 1.48607  | 3.29256  | -4.17247 | C                | -3.62084 | -1.22377 | 0.06883  |
| H | -1.2963  | 5.26877  | -1.54807 | C                | -3.74023 | -1.83147 | -1.19463 |
| H | 0.61692  | 5.38108  | -3.14227 | C                | -2.63705 | -2.08897 | -1.98729 |
| C | -0.60863 | 1.73481  | 1.98518  | C                | -1.40939 | -1.56146 | -1.56691 |
| C | 0.52066  | 2.54466  | 2.19815  | C                | -1.2662  | -0.84499 | -0.37896 |
| C | 1.69727  | 2.02081  | 2.70331  | C                | -2.3492  | -0.81858 | 0.52131  |
| C | 1.72562  | 0.64988  | 2.9681   | H                | -2.72737 | -2.62225 | -2.93285 |
| C | 0.63202  | -0.1731  | 2.71168  | H                | -0.53758 | -1.70768 | -2.2102  |
| C | -0.55245 | 0.36232  | 2.19862  | C                | -4.98173 | -0.90842 | 0.50307  |
| H | 2.57263  | 2.64213  | 2.8799   | C                | -5.91779 | -1.48247 | -0.59748 |
| H | 2.63864  | 0.20944  | 3.36721  | O                | -5.40058 | -0.27086 | 1.44546  |
| H | 0.69655  | -1.2463  | 2.89169  | O                | -7.1249  | -1.41691 | -0.63105 |
| C | -1.69459 | 2.6034   | 1.55049  | N                | -5.08775 | -2.05855 | -1.52956 |
| C | -1.06551 | 4.02285  | 1.45748  | C                | -5.5431  | -2.61718 | -2.77374 |
| O | -2.86182 | 2.36717  | 1.32826  | H                | -5.19392 | -2.01672 | -3.62652 |
| O | -1.61194 | 5.04365  | 1.11674  | H                | -5.18621 | -3.64784 | -2.89772 |
| N | 0.25005  | 3.87333  | 1.85352  | H                | -6.63706 | -2.61275 | -2.75327 |
| C | 1.22301  | 4.93465  | 1.80931  | C                | -2.0324  | -0.3061  | 1.86027  |
| H | 1.64489  | 5.13042  | 2.80371  | C                | -2.68298 | -0.62995 | 3.06794  |

|    |          |          |          |   |          |          |          |
|----|----------|----------|----------|---|----------|----------|----------|
| C  | -2.26735 | 0.0349   | 4.22252  | C | 4.50801  | -1.99234 | 0.98403  |
| C  | -0.5106  | 1.07361  | 3.01861  | C | 5.13502  | -1.10373 | 1.83879  |
| C  | -1.21241 | 0.93118  | 4.20423  | C | 5.00946  | 0.26059  | 1.5527   |
| H  | -2.7765  | -0.19033 | 5.16001  | C | 4.28098  | 0.72852  | 0.46237  |
| H  | 0.40402  | 1.65744  | 2.94523  | C | 3.64447  | -0.1816  | -0.38611 |
| H  | -0.88756 | 1.45368  | 5.09991  | H | 5.69087  | -1.44059 | 2.71151  |
| C  | -3.69305 | -1.72464 | 3.21846  | H | 5.48947  | 0.98082  | 2.21333  |
| H  | -3.48976 | -2.27519 | 4.1457   | H | 4.17715  | 1.79947  | 0.28669  |
| H  | -4.71529 | -1.33391 | 3.26621  | C | 3.22441  | -2.69192 | -0.81667 |
| H  | -3.64964 | -2.43795 | 2.38851  | C | 3.64798  | -3.90994 | 0.05278  |
| N  | -0.90346 | 0.45951  | 1.90258  | O | 2.61079  | -2.75879 | -1.85591 |
| Rh | 0.33761  | 0.36461  | 0.27766  | O | 3.3899   | -5.0741  | -0.12821 |
| Cl | 1.11259  | -1.70219 | 1.30446  | N | 4.43066  | -3.38438 | 1.07082  |
| H  | 1.62727  | 1.0631   | 1.02284  | C | 4.97934  | -4.1762  | 2.14029  |
| C  | -0.8417  | 2.07237  | -0.44797 | H | 6.07242  | -4.07882 | 2.18304  |
| C  | 0.28311  | 2.49932  | -0.08059 | H | 4.5532   | -3.87577 | 3.10686  |
| C  | -2.25046 | 2.07851  | -0.73738 | H | 4.71913  | -5.21996 | 1.94028  |
| C  | -3.1377  | 2.42722  | 0.29403  | C | 2.86675  | 0.20458  | -1.58889 |
| C  | -2.77305 | 1.68169  | -1.97453 | C | 3.56431  | 0.38787  | -2.79531 |
| C  | -4.50905 | 2.36873  | 0.09292  | C | 2.83073  | 0.66848  | -3.9417  |
| H  | -2.73048 | 2.72608  | 1.26053  | C | 0.84037  | 0.54333  | -2.64651 |
| C  | -4.1468  | 1.61479  | -2.16632 | C | 1.44808  | 0.73628  | -3.87247 |
| H  | -2.09876 | 1.4222   | -2.78887 | H | 3.34799  | 0.81315  | -4.89002 |
| C  | -5.01922 | 1.95079  | -1.13394 | H | -0.23973 | 0.58815  | -2.54481 |
| H  | -5.18579 | 2.61226  | 0.90893  | H | 0.84102  | 0.93794  | -4.75113 |
| H  | -4.54024 | 1.28758  | -3.12812 | C | 5.05282  | 0.23022  | -2.85689 |
| H  | -6.09599 | 1.87419  | -1.27792 | H | 5.437    | 0.54415  | -3.83429 |
| C  | 1.24997  | 3.55087  | 0.13408  | H | 5.5642   | 0.81195  | -2.08044 |
| C  | 2.36894  | 3.69426  | -0.69576 | H | 5.33766  | -0.82042 | -2.70538 |
| C  | 1.05315  | 4.46079  | 1.17933  | N | 1.52328  | 0.29613  | -1.51567 |
| C  | 3.27418  | 4.72439  | -0.47542 |   |          |          |          |
| H  | 2.51932  | 2.99038  | -1.51544 |   |          |          |          |
| C  | 1.96495  | 5.48642  | 1.39742  |   |          |          |          |
| H  | 0.17432  | 4.35107  | 1.81489  |   |          |          |          |
| C  | 3.07826  | 5.62055  | 0.57317  |   |          |          |          |
| H  | 4.1377   | 4.83129  | -1.13026 |   |          |          |          |
| H  | 1.80174  | 6.18914  | 2.21283  |   |          |          |          |
| H  | 3.79143  | 6.42505  | 0.74354  |   |          |          |          |
| C  | 3.79683  | -1.53202 | -0.13062 |   |          |          |          |

**88**

**MeC1'(15)**

|   |         |         |          |
|---|---------|---------|----------|
| C | 3.23332 | 1.37481 | -0.40797 |
| C | 3.25782 | 2.17295 | 0.75078  |
| C | 2.32802 | 2.01746 | 1.76189  |
| C | 1.27332 | 1.13    | 1.52559  |
| C | 1.16023 | 0.36995 | 0.36469  |
| C | 2.22718 | 0.39664 | -0.55353 |

|    |          |          |          |   |          |          |          |
|----|----------|----------|----------|---|----------|----------|----------|
| H  | 2.38009  | 2.60466  | 2.67883  | C | -0.15016 | -5.29393 | -0.05349 |
| H  | 0.50803  | 1.02789  | 2.2985   | C | -2.05669 | -4.2138  | -1.07054 |
| C  | 4.19136  | 1.97962  | -1.33673 | C | -0.62821 | -6.52866 | -0.46554 |
| C  | 4.89773  | 3.11038  | -0.53763 | H | 0.78189  | -5.21658 | 0.50627  |
| O  | 4.41165  | 1.77535  | -2.50982 | C | -2.53565 | -5.45528 | -1.47219 |
| O  | 5.79594  | 3.82293  | -0.9194  | H | -2.60007 | -3.29859 | -1.309   |
| N  | 4.28509  | 3.13064  | 0.69378  | C | -1.82442 | -6.61368 | -1.17557 |
| C  | 4.5886   | 4.08275  | 1.72715  | H | -0.06524 | -7.43055 | -0.2306  |
| H  | 3.71548  | 4.70988  | 1.95548  | H | -3.4701  | -5.51441 | -2.02747 |
| H  | 4.91334  | 3.57984  | 2.64806  | H | -2.19859 | -7.58281 | -1.50122 |
| H  | 5.40032  | 4.7168   | 1.35754  | C | -2.98624 | 2.32065  | -0.01385 |
| C  | 2.17559  | -0.63765 | -1.5926  | C | -2.86592 | 3.51385  | -0.73808 |
| C  | 3.2586   | -1.20471 | -2.29556 | C | -1.95612 | 4.48729  | -0.3635  |
| C  | 2.96346  | -2.10523 | -3.32108 | C | -1.16294 | 4.22306  | 0.75474  |
| C  | 0.65953  | -2.00109 | -2.776   | C | -1.26345 | 3.03261  | 1.4703   |
| C  | 1.66033  | -2.46363 | -3.6158  | C | -2.16012 | 2.04193  | 1.06442  |
| H  | 3.79102  | -2.5357  | -3.88544 | H | -1.84635 | 5.4157   | -0.92002 |
| H  | -0.37737 | -2.30857 | -2.87537 | H | -0.44109 | 4.97172  | 1.07771  |
| H  | 1.41869  | -3.13753 | -4.43282 | H | -0.63139 | 2.87286  | 2.34131  |
| C  | 4.69977  | -1.00307 | -1.94104 | C | -4.00677 | 1.49999  | -0.67377 |
| H  | 5.23069  | -1.95874 | -2.04053 | C | -4.438   | 2.32816  | -1.91601 |
| H  | 5.18354  | -0.27256 | -2.59839 | O | -4.49692 | 0.44416  | -0.3512  |
| H  | 4.82511  | -0.65083 | -0.91033 | O | -5.24326 | 2.02486  | -2.76124 |
| N  | 0.92964  | -1.16293 | -1.77592 | N | -3.73313 | 3.51866  | -1.83265 |
| Rh | -0.46913 | -0.79209 | -0.34513 | C | -3.78214 | 4.54371  | -2.84227 |
| C  | 0.47377  | -2.2897  | 0.93409  | H | -4.10293 | 5.5037   | -2.41627 |
| C  | -0.31086 | -2.87208 | 0.13549  | H | -2.8     | 4.66953  | -3.31763 |
| C  | 1.42736  | -2.09535 | 1.99134  | H | -4.50846 | 4.22315  | -3.59513 |
| C  | 2.7987   | -2.23585 | 1.738    | C | -2.39746 | 0.76604  | 1.78843  |
| C  | 1.00186  | -1.72209 | 3.27282  | C | -3.22183 | 0.83967  | 2.9279   |
| C  | 3.72408  | -1.98992 | 2.74319  | C | -3.6528  | -0.34601 | 3.50789  |
| H  | 3.12259  | -2.52525 | 0.7379   | C | -2.45662 | -1.53632 | 1.83214  |
| C  | 1.93311  | -1.48275 | 4.27488  | C | -3.29103 | -1.5525  | 2.93361  |
| H  | -0.0658  | -1.60824 | 3.46579  | H | -4.30293 | -0.31489 | 4.38204  |
| C  | 3.29479  | -1.6094  | 4.01267  | H | -2.15968 | -2.4707  | 1.37075  |
| H  | 4.78769  | -2.09393 | 2.53446  | H | -3.64885 | -2.50267 | 3.32158  |
| H  | 1.59402  | -1.19266 | 5.26814  | C | -3.69477 | 2.15816  | 3.46461  |
| H  | 4.02275  | -1.41575 | 4.79858  | H | -4.31839 | 2.00924  | 4.35359  |
| C  | -0.85989 | -4.1186  | -0.35256 | H | -2.86407 | 2.81981  | 3.73852  |

|                                                                   |          |          |          |   |          |          |          |
|-------------------------------------------------------------------|----------|----------|----------|---|----------|----------|----------|
| H                                                                 | -4.29309 | 2.69776  | 2.71808  | C | -0.393   | 2.17444  | -0.00634 |
| N                                                                 | -1.96865 | -0.41148 | 1.27824  | C | 0.404    | 2.03229  | 0.98926  |
| H                                                                 | -1.73943 | -1.49046 | -1.10965 | C | -1.3665  | 2.99779  | -0.67881 |
| Cl                                                                | -1.03642 | 1.00998  | -1.87243 | C | -1.87939 | 4.13181  | -0.02626 |
|                                                                   |          |          |          | C | -1.85099 | 2.68512  | -1.95692 |
| <b>88</b>                                                         |          |          |          | C | -2.84033 | 4.92484  | -0.63627 |
| <b>Me<sup>e</sup>TS<sub>Cl<sup>-</sup>D<sup>-</sup>}(1)</sub></b> |          |          |          | H | -1.52545 | 4.36671  | 0.97741  |
| C                                                                 | -3.8204  | -1.11088 | 0.56823  | C | -2.81173 | 3.48264  | -2.56509 |
| C                                                                 | -3.99805 | -1.04943 | 1.96358  | H | -1.47132 | 1.80212  | -2.46857 |
| C                                                                 | -3.03729 | -0.51911 | 2.8031   | C | -3.31012 | 4.60403  | -1.90847 |
| C                                                                 | -1.82892 | -0.11875 | 2.2284   | H | -3.23141 | 5.79633  | -0.11379 |
| C                                                                 | -1.60729 | -0.19228 | 0.8558   | H | -3.17462 | 3.2217   | -3.55872 |
| C                                                                 | -2.64026 | -0.60826 | -0.01414 | H | -4.06672 | 5.22544  | -2.38415 |
| H                                                                 | -3.18727 | -0.47121 | 3.88035  | C | 1.12399  | 2.65534  | 2.07635  |
| H                                                                 | -1.03048 | 0.23434  | 2.88003  | C | 1.7171   | 1.93128  | 3.11841  |
| C                                                                 | -4.90244 | -1.9668  | 0.06417  | C | 1.21791  | 4.05758  | 2.09335  |
| C                                                                 | -5.82415 | -2.24387 | 1.28368  | C | 2.37264  | 2.58785  | 4.15217  |
| O                                                                 | -5.08815 | -2.47513 | -1.0177  | H | 1.66867  | 0.84079  | 3.10787  |
| O                                                                 | -6.8624  | -2.86095 | 1.28617  | C | 1.87814  | 4.70804  | 3.12529  |
| N                                                                 | -5.2074  | -1.6446  | 2.35689  | H | 0.77595  | 4.62546  | 1.27467  |
| C                                                                 | -5.68298 | -1.73675 | 3.71157  | C | 2.45661  | 3.97704  | 4.16104  |
| H                                                                 | -4.9736  | -2.28976 | 4.34254  | H | 2.82317  | 2.008    | 4.95647  |
| H                                                                 | -5.84211 | -0.73981 | 4.14355  | H | 1.94638  | 5.79459  | 3.11927  |
| H                                                                 | -6.63519 | -2.27518 | 3.68504  | H | 2.97425  | 4.48948  | 4.96993  |
| C                                                                 | -2.32539 | -0.58076 | -1.44983 | C | 3.61001  | -1.66455 | -0.07665 |
| C                                                                 | -3.21408 | -0.49668 | -2.53639 | C | 3.84119  | -2.55297 | 0.98222  |
| C                                                                 | -2.66981 | -0.68062 | -3.8114  | C | 4.19609  | -2.08616 | 2.23717  |
| C                                                                 | -0.48258 | -0.76794 | -2.89065 | C | 4.30634  | -0.70238 | 2.40187  |
| C                                                                 | -1.31354 | -0.89281 | -3.99849 | C | 4.06661  | 0.18904  | 1.35782  |
| H                                                                 | -3.34176 | -0.646   | -4.66976 | C | 3.6954   | -0.29533 | 0.09965  |
| H                                                                 | 0.60498  | -0.82026 | -2.96046 | H | 4.36685  | -2.76431 | 3.0709   |
| H                                                                 | -0.89345 | -1.08207 | -4.98269 | H | 4.58353  | -0.30797 | 3.37938  |
| C                                                                 | -4.64459 | -0.07009 | -2.42479 | H | 4.144    | 1.26402  | 1.52286  |
| H                                                                 | -4.85863 | 0.66971  | -3.20805 | C | 3.18591  | -2.45072 | -1.24003 |
| H                                                                 | -5.33854 | -0.90856 | -2.54532 | C | 3.15766  | -3.91686 | -0.73131 |
| H                                                                 | -4.85157 | 0.40291  | -1.45776 | O | 2.95812  | -2.10526 | -2.37677 |
| N                                                                 | -0.9869  | -0.55977 | -1.67889 | O | 2.8438   | -4.90576 | -1.34459 |
| Rh                                                                | 0.13738  | 0.16645  | -0.00504 | N | 3.61918  | -3.86793 | 0.57945  |
| H                                                                 | 0.93093  | 0.43119  | 1.34621  | C | 3.55203  | -4.99441 | 1.47331  |

|    |         |          |          |    |          |          |          |
|----|---------|----------|----------|----|----------|----------|----------|
| H  | 4.52121 | -5.1742  | 1.95653  | C  | 2.04691  | -1.1309  | -3.64039 |
| H  | 2.78429 | -4.83089 | 2.24308  | C  | 0.4857   | 0.55131  | -3.03404 |
| H  | 3.27981 | -5.8687  | 0.87459  | C  | 1.42001  | 0.06031  | -3.94366 |
| C  | 3.38684 | 0.61077  | -1.03286 | H  | 2.70088  | -1.6075  | -4.37135 |
| C  | 4.43581 | 1.1372   | -1.80449 | H  | -0.17231 | 1.39076  | -3.25615 |
| C  | 4.09825 | 1.97927  | -2.85727 | H  | 1.59157  | 0.57419  | -4.8851  |
| C  | 1.80334 | 1.69631  | -2.29358 | C  | 2.35156  | -3.17869 | -2.26778 |
| C  | 2.7648  | 2.27097  | -3.10735 | H  | 2.06354  | -3.75307 | -3.15889 |
| H  | 4.88593 | 2.40072  | -3.48213 | H  | 3.44272  | -3.21283 | -2.1823  |
| H  | 0.74767 | 1.91386  | -2.45162 | H  | 1.93071  | -3.68857 | -1.39502 |
| H  | 2.46959 | 2.93005  | -3.9201  | N  | 0.3107   | -0.02627 | -1.85378 |
| C  | 5.85948 | 0.76377  | -1.52664 | Rh | -1.47696 | 0.19844  | -0.6781  |
| H  | 6.54113 | 1.28239  | -2.21075 | Cl | -2.73901 | 1.26225  | -2.60041 |
| H  | 6.15636 | 1.00628  | -0.49827 | H  | -2.07796 | -1.17035 | -1.22762 |
| H  | 6.0113  | -0.31732 | -1.65292 | C  | -3.31201 | -0.90394 | -0.30059 |
| N  | 2.09492 | 0.87127  | -1.27954 | C  | -3.20003 | 0.10648  | 0.47328  |
| Cl | 0.6151  | -2.23001 | 0.34145  | C  | -4.0784  | -2.04529 | -0.74806 |

## 88

### Me<sup>c</sup>TS<sub>Cl'-D'</sub>(2)

|   |          |          |          |   |          |          |          |
|---|----------|----------|----------|---|----------|----------|----------|
| C | 1.72466  | -2.14252 | 0.76836  | H | -5.07475 | -2.21898 | 1.15432  |
| C | 1.39118  | -2.4292  | 2.106    | C | -4.74359 | -3.64126 | -2.43411 |
| C | 0.1635   | -2.09257 | 2.63956  | H | -3.2719  | -2.08926 | -2.74224 |
| C | -0.7081  | -1.35523 | 1.83083  | C | -5.64851 | -4.21262 | -1.54389 |
| C | -0.38702 | -0.98036 | 0.52515  | H | -6.47748 | -4.14317 | 0.44582  |
| C | 0.80791  | -1.47118 | -0.06322 | H | -4.65003 | -4.03424 | -3.44491 |
| H | -0.09849 | -2.33847 | 3.66789  | H | -6.25855 | -5.0594  | -1.85361 |
| H | -1.65957 | -1.03458 | 2.25648  | C | -3.80847 | 0.93347  | 1.48396  |
| C | 3.16226  | -2.38201 | 0.65075  | C | -3.04309 | 1.76169  | 2.31464  |
| C | 3.61958  | -2.91412 | 2.03417  | C | -5.20275 | 0.90627  | 1.65089  |
| O | 3.94902  | -2.16509 | -0.24654 | C | -3.65275 | 2.5308   | 3.29747  |
| O | 4.75243  | -3.18245 | 2.36568  | H | -1.96406 | 1.79212  | 2.16826  |
| N | 2.48346  | -2.9809  | 2.80236  | C | -5.80714 | 1.68198  | 2.62935  |
| C | 2.48202  | -3.30458 | 4.20464  | H | -5.80116 | 0.27848  | 0.99107  |
| H | 2.20201  | -2.42955 | 4.81001  | C | -5.03478 | 2.49368  | 3.458    |
| H | 1.78136  | -4.12111 | 4.4202   | H | -3.0456  | 3.16798  | 3.93864  |
| H | 3.49632  | -3.61719 | 4.47031  | H | -6.88944 | 1.65675  | 2.74465  |
| C | 1.04351  | -1.11143 | -1.4709  | H | -5.51221 | 3.10083  | 4.22519  |
| C | 1.84102  | -1.77846 | -2.41306 | C | 2.72731  | 1.45948  | 0.07498  |

|   |          |          |          |    |          |          |          |
|---|----------|----------|----------|----|----------|----------|----------|
| C | 3.78523  | 0.77797  | 0.7071   | H  | 2.9316   | 2.23458  | -3.84524 |
| C | 3.68211  | 0.35176  | 2.02204  | H  | 0.54952  | 1.71272  | -3.34588 |
| C | 2.47149  | 0.59546  | 2.67601  | C  | 4.39502  | 1.30414  | 0.23541  |
| C | 1.42197  | 1.27774  | 2.06395  | C  | 5.54596  | 1.65586  | -0.74705 |
| C | 1.54124  | 1.74332  | 0.75058  | O  | 4.61886  | 0.80414  | 1.31989  |
| H | 4.50265  | -0.1623  | 2.52074  | O  | 6.73217  | 1.6035   | -0.51938 |
| H | 2.34881  | 0.25191  | 3.70329  | N  | 4.93324  | 2.01158  | -1.92203 |
| H | 0.50926  | 1.48237  | 2.62167  | C  | 5.6364   | 2.36271  | -3.12758 |
| C | 3.16306  | 1.74976  | -1.29049 | H  | 5.45915  | 1.62373  | -3.92137 |
| C | 4.57928  | 1.11933  | -1.40698 | H  | 5.32609  | 3.35164  | -3.48898 |
| O | 2.61729  | 2.35829  | -2.18297 | H  | 6.70369  | 2.3823   | -2.88713 |
| O | 5.28272  | 1.09068  | -2.38655 | C  | 1.22568  | 1.04083  | 1.12695  |
| N | 4.87276  | 0.62403  | -0.1503  | C  | 1.736    | 1.40975  | 2.38747  |
| C | 6.10475  | -0.05458 | 0.18365  | C  | 1.13363  | 0.85093  | 3.5184   |
| H | 6.6403   | 0.48401  | 0.97642  | C  | -0.55365 | -0.09951 | 2.15607  |
| H | 5.90379  | -1.0861  | 0.49841  | C  | 0.01368  | 0.0458   | 3.41436  |
| H | 6.71895  | -0.06738 | -0.7214  | H  | 1.54521  | 1.09297  | 4.49892  |
| C | 0.52914  | 2.70385  | 0.2308   | H  | -1.50894 | -0.60018 | 2.01715  |
| C | 0.88658  | 4.06581  | 0.2417   | H  | -0.45128 | -0.41388 | 4.28186  |
| C | -0.09817 | 4.99498  | -0.07784 | C  | 2.77015  | 2.47159  | 2.60776  |
| C | -1.63965 | 3.21076  | -0.38777 | H  | 2.40879  | 3.15907  | 3.38413  |
| C | -1.37919 | 4.56909  | -0.38333 | H  | 3.72762  | 2.0567   | 2.94043  |
| H | 0.14891  | 6.05674  | -0.0709  | H  | 2.95885  | 3.06092  | 1.70494  |
| H | -2.61951 | 2.83354  | -0.66653 | N  | 0.02453  | 0.38505  | 1.05736  |
| H | -2.17365 | 5.26998  | -0.62524 | Rh | -1.02886 | 0.70557  | -0.73599 |
| C | 2.26664  | 4.53333  | 0.59724  | H  | -1.56786 | 2.08724  | 0.02672  |
| H | 2.26917  | 5.61605  | 0.76923  | C  | -2.81249 | 1.63194  | 0.36549  |
| H | 2.65445  | 4.04746  | 1.50179  | C  | -3.00851 | 0.38477  | 0.17184  |
| H | 2.97605  | 4.33082  | -0.21596 | C  | -3.4243  | 2.87538  | 0.80768  |
| N | -0.70829 | 2.28449  | -0.09585 | C  | -4.64992 | 2.80687  | 1.4857   |
|   |          |          |          | C  | -2.84774 | 4.12291  | 0.55652  |
|   |          |          |          | C  | -5.27744 | 3.96955  | 1.90662  |
|   |          |          |          | H  | -5.09605 | 1.83041  | 1.67434  |
| C | 3.15191  | 1.57469  | -0.48308 | C  | -3.48332 | 5.28384  | 0.97899  |
| C | 3.53667  | 1.89263  | -1.80072 | H  | -1.90762 | 4.17549  | 0.00554  |
| C | 2.62036  | 1.98112  | -2.83238 | C  | -4.69613 | 5.21169  | 1.65699  |
| C | 1.28761  | 1.68377  | -2.54355 | H  | -6.22796 | 3.90717  | 2.43412  |
| C | 0.85221  | 1.33468  | -1.25875 | H  | -3.02896 | 6.25157  | 0.77355  |
| C | 1.78348  | 1.3524   | -0.19433 | H  | -5.19178 | 6.12249  | 1.98841  |

**88**

**Me<sup>c</sup>TS<sub>Cl<sup>-</sup>D<sup>-</sup>}(3)</sub>**

|   |          |          |          |                                                                    |          |          |          |
|---|----------|----------|----------|--------------------------------------------------------------------|----------|----------|----------|
| C | -3.88922 | -0.74863 | 0.11567  | H                                                                  | 1.27406  | -4.75684 | -1.51301 |
| C | -3.48995 | -2.01371 | 0.57085  | H                                                                  | 0.16305  | -5.10334 | -0.17986 |
| C | -5.15405 | -0.60515 | -0.47878 | N                                                                  | -1.0419  | -1.38094 | -1.67877 |
| C | -4.3476  | -3.09952 | 0.46321  | Cl                                                                 | -1.99912 | 1.60448  | -2.72629 |
| H | -2.48903 | -2.15602 | 0.97992  |                                                                    |          |          |          |
| C | -5.99759 | -1.70176 | -0.60081 | <b>88</b>                                                          |          |          |          |
| H | -5.44977 | 0.37443  | -0.85476 | <b>Me<sup>e</sup>TS<sub>Cl<sup>e</sup>-D<sup>e</sup>}(4)</sub></b> |          |          |          |
| C | -5.60104 | -2.95022 | -0.12511 | C                                                                  | 2.81609  | -0.91586 | -1.36178 |
| H | -4.0203  | -4.07329 | 0.82459  | C                                                                  | 3.14044  | -2.18749 | -0.84715 |
| H | -6.9738  | -1.5798  | -1.06804 | C                                                                  | 2.16562  | -3.05373 | -0.39043 |
| H | -6.26774 | -3.80606 | -0.21785 | C                                                                  | 0.84267  | -2.5956  | -0.38999 |
| C | 1.41723  | -2.40405 | 0.52237  | C                                                                  | 0.47816  | -1.3338  | -0.86519 |
| C | 2.71977  | -2.15783 | 0.98873  | C                                                                  | 1.47023  | -0.50384 | -1.42112 |
| C | 3.74173  | -1.81108 | 0.1232   | H                                                                  | 2.42106  | -4.0319  | 0.01344  |
| C | 3.4011   | -1.61571 | -1.21682 | H                                                                  | 0.07341  | -3.24629 | 0.03023  |
| C | 2.09524  | -1.77319 | -1.67932 | C                                                                  | 4.08078  | -0.20301 | -1.50996 |
| C | 1.08092  | -2.18341 | -0.81028 | C                                                                  | 5.18713  | -1.22347 | -1.12747 |
| H | 4.75709  | -1.64927 | 0.47743  | O                                                                  | 4.32834  | 0.95674  | -1.77707 |
| H | 4.17908  | -1.31891 | -1.92049 | O                                                                  | 6.37783  | -1.00828 | -1.09832 |
| H | 1.85335  | -1.57651 | -2.723   | N                                                                  | 4.5326   | -2.38318 | -0.79625 |
| C | 0.62526  | -2.8416  | 1.66777  | C                                                                  | 5.17247  | -3.50634 | -0.15591 |
| C | 1.57997  | -2.71596 | 2.89189  | H                                                                  | 4.82699  | -3.59348 | 0.88292  |
| O | -0.51497 | -3.24669 | 1.73832  | H                                                                  | 4.96904  | -4.43654 | -0.70125 |
| O | 1.30069  | -2.89858 | 4.05314  | H                                                                  | 6.24854  | -3.3096  | -0.15519 |
| N | 2.79728  | -2.32803 | 2.3757   | C                                                                  | 0.99273  | 0.7905   | -1.93132 |
| C | 3.94528  | -1.98282 | 3.18181  | C                                                                  | 1.4986   | 1.49805  | -3.03771 |
| H | 4.76472  | -2.69762 | 3.03092  | C                                                                  | 0.90945  | 2.72865  | -3.32946 |
| H | 4.29196  | -0.97356 | 2.9253   | C                                                                  | -0.69227 | 2.37858  | -1.61564 |
| H | 3.62961  | -2.01861 | 4.22888  | C                                                                  | -0.16552 | 3.2034   | -2.59619 |
| C | -0.27285 | -2.44036 | -1.36257 | H                                                                  | 1.28732  | 3.29735  | -4.17973 |
| C | -0.64247 | -3.76243 | -1.65641 | H                                                                  | -1.59555 | 2.64932  | -1.06771 |
| C | -1.84001 | -3.96098 | -2.33699 | H                                                                  | -0.63625 | 4.15733  | -2.82094 |
| C | -2.18057 | -1.60372 | -2.35739 | C                                                                  | 2.5151   | 0.95605  | -3.99397 |
| C | -2.60891 | -2.87184 | -2.71191 | H                                                                  | 2.21071  | 1.19753  | -5.02028 |
| H | -2.15246 | -4.97618 | -2.58261 | H                                                                  | 3.5087   | 1.38452  | -3.82188 |
| H | -2.75384 | -0.71671 | -2.61984 | H                                                                  | 2.60462  | -0.1332  | -3.92247 |
| H | -3.54579 | -2.99027 | -3.25072 | N                                                                  | -0.13119 | 1.2138   | -1.30081 |
| C | 0.21871  | -4.92379 | -1.26233 | Rh                                                                 | -1.34445 | -0.44312 | -0.59332 |
| H | -0.11053 | -5.83943 | -1.76719 | C                                                                  | -3.55325 | -0.86704 | -0.25075 |



|   |          |          |          |    |          |          |          |
|---|----------|----------|----------|----|----------|----------|----------|
| C | -3.33219 | 0.38224  | -0.12868 | H  | 5.79637  | 2.17201  | 1.64645  |
| C | -4.5913  | -1.88697 | -0.30035 | H  | 6.35636  | 0.48901  | 1.38697  |
| C | -5.9078  | -1.52066 | 0.01232  | C  | -0.31872 | 0.40814  | 2.34595  |
| C | -4.3148  | -3.21033 | -0.65344 | C  | -0.45113 | 0.49726  | 3.7432   |
| C | -6.92043 | -2.46705 | -0.02314 | C  | -1.30738 | -0.39623 | 4.3756   |
| H | -6.11955 | -0.48475 | 0.2771   | C  | -1.80788 | -1.34856 | 2.25498  |
| C | -5.33448 | -4.15398 | -0.69009 | C  | -1.96935 | -1.3556  | 3.62747  |
| H | -3.29424 | -3.48703 | -0.92499 | H  | -1.42562 | -0.35292 | 5.45805  |
| C | -6.63788 | -3.78717 | -0.37216 | H  | -2.33419 | -2.07543 | 1.64309  |
| H | -7.94024 | -2.17419 | 0.22149  | H  | -2.6144  | -2.09792 | 4.08992  |
| H | -5.10842 | -5.1803  | -0.97413 | C  | 0.34282  | 1.48546  | 4.54358  |
| H | -7.43624 | -4.52658 | -0.40209 | H  | -0.02137 | 1.52594  | 5.57661  |
| C | -3.66304 | 1.75676  | 0.06502  | H  | 1.40542  | 1.20694  | 4.5785   |
| C | -3.30901 | 2.411    | 1.25868  | H  | 0.29223  | 2.49694  | 4.12246  |
| C | -4.26151 | 2.49908  | -0.9667  | N  | -1.03123 | -0.46332 | 1.60439  |
| C | -3.56063 | 3.76785  | 1.41536  | H  | -2.44316 | -1.67558 | -0.40915 |
| H | -2.82851 | 1.83577  | 2.05324  | Cl | -1.7985  | -0.69637 | -2.89983 |
| C | -4.50283 | 3.85734  | -0.79986 |    |          |          |          |
| H | -4.51082 | 1.99314  | -1.89895 |    |          |          |          |
| C | -4.15589 | 4.49755  | 0.38764  |    |          |          |          |
| H | -3.28944 | 4.26158  | 2.34784  |    |          |          |          |
| H | -4.96772 | 4.4211   | -1.6073  |    |          |          |          |
| H | -4.34814 | 5.56163  | 0.5127   |    |          |          |          |
| C | 2.03165  | 0.70499  | 1.68397  |    |          |          |          |
| C | 3.12277  | 1.45465  | 1.21808  |    |          |          |          |
| C | 2.94462  | 2.74007  | 0.73272  |    |          |          |          |
| C | 1.65115  | 3.26661  | 0.77773  |    |          |          |          |
| C | 0.56636  | 2.54487  | 1.27813  |    |          |          |          |
| C | 0.74316  | 1.23247  | 1.71265  |    |          |          |          |
| H | 3.77428  | 3.31347  | 0.3254   |    |          |          |          |
| H | 1.48393  | 4.27612  | 0.40475  |    |          |          |          |
| H | -0.42983 | 2.98951  | 1.29416  |    |          |          |          |
| C | 2.54373  | -0.59021 | 2.13048  |    |          |          |          |
| C | 4.0728   | -0.52636 | 1.86263  |    |          |          |          |
| O | 1.97953  | -1.53194 | 2.63753  |    |          |          |          |
| O | 4.88602  | -1.39339 | 2.08219  |    |          |          |          |
| N | 4.31413  | 0.72573  | 1.32923  |    |          |          |          |
| C | 5.63864  | 1.25098  | 1.07017  |    |          |          |          |
| H | 5.77614  | 1.44368  | -0.00094 |    |          |          |          |

## 88

### Me<sup>e</sup>TS<sub>Cl<sup>-</sup>-D<sup>+</sup></sub>(5)

|   |          |          |          |
|---|----------|----------|----------|
| C | -4.18041 | -0.45717 | 0.33025  |
| C | -4.44048 | 0.19519  | 1.55145  |
| C | -3.50012 | 0.99692  | 2.16692  |
| C | -2.23371 | 1.07433  | 1.58213  |
| C | -1.93356 | 0.42155  | 0.38845  |
| C | -2.93851 | -0.2856  | -0.31164 |
| H | -3.71036 | 1.50148  | 3.10861  |
| H | -1.45886 | 1.64175  | 2.09462  |
| C | -5.27784 | -1.41833 | 0.15038  |
| C | -6.29307 | -1.11569 | 1.28702  |
| O | -5.42142 | -2.34223 | -0.61679 |
| O | -7.36822 | -1.63771 | 1.46023  |
| N | -5.70748 | -0.1369  | 2.05507  |
| C | -6.27531 | 0.37851  | 3.27236  |
| H | -5.65016 | 0.12458  | 4.13955  |
| H | -6.39054 | 1.46933  | 3.22293  |
| H | -7.25985 | -0.08377 | 3.39236  |
| C | -2.54216 | -0.87404 | -1.59855 |

|    |          |          |          |    |         |          |          |
|----|----------|----------|----------|----|---------|----------|----------|
| C  | -3.36177 | -1.2265  | -2.68421 | C  | 3.49407 | -2.27147 | 1.39248  |
| C  | -2.76005 | -1.9464  | -3.7219  | C  | 4.14614 | -1.49492 | 2.33581  |
| C  | -0.63789 | -1.71586 | -2.68043 | C  | 4.51736 | -0.2018  | 1.9619   |
| C  | -1.41321 | -2.25883 | -3.69934 | C  | 4.23614 | 0.3061   | 0.69662  |
| H  | -3.38082 | -2.25481 | -4.56394 | C  | 3.56749 | -0.48013 | -0.24682 |
| H  | 0.44482  | -1.8375  | -2.64487 | H  | 4.34904 | -1.86589 | 3.33876  |
| H  | -0.94953 | -2.85512 | -4.48042 | H  | 5.00445 | 0.44092  | 2.69426  |
| C  | -4.78048 | -0.78243 | -2.8633  | H  | 4.50291 | 1.33361  | 0.44808  |
| H  | -4.91458 | -0.41717 | -3.89028 | C  | 2.53633 | -2.8387  | -0.6369  |
| H  | -5.49068 | -1.59941 | -2.69623 | C  | 2.36801 | -3.99434 | 0.38394  |
| H  | -5.04875 | 0.03236  | -2.18201 | O  | 2.22063 | -2.90683 | -1.80367 |
| N  | -1.19294 | -1.01071 | -1.70116 | O  | 1.82559 | -5.05616 | 0.2103   |
| Rh | -0.11143 | 0.27189  | -0.37068 | N  | 3.01825 | -3.57335 | 1.53727  |
| H  | -0.44274 | 1.51504  | -1.30616 | C  | 2.88767 | -4.25057 | 2.80062  |
| C  | 0.32916  | 2.34415  | -0.05336 | H  | 3.86888 | -4.42143 | 3.26217  |
| C  | 0.81426  | 1.63756  | 0.89846  | H  | 2.25859 | -3.66319 | 3.48605  |
| C  | -0.00288 | 3.66815  | -0.53298 | H  | 2.40669 | -5.21418 | 2.60815  |
| C  | 0.2338   | 4.7533   | 0.32833  | C  | 3.22611 | 0.04772  | -1.58952 |
| C  | -0.53892 | 3.92534  | -1.79985 | C  | 4.24193 | 0.25041  | -2.54022 |
| C  | -0.04822 | 6.04932  | -0.07512 | C  | 3.86478 | 0.73698  | -3.78722 |
| H  | 0.6281   | 4.56025  | 1.32557  | C  | 1.60362 | 0.76461  | -3.05111 |
| C  | -0.82055 | 5.22524  | -2.20005 | C  | 2.52948 | 1.00312  | -4.05309 |
| H  | -0.7387  | 3.09297  | -2.47588 | H  | 4.62493 | 0.89513  | -4.55272 |
| C  | -0.57366 | 6.29249  | -1.34268 | H  | 0.54266 | 0.95042  | -3.22167 |
| H  | 0.13672  | 6.87658  | 0.60813  | H  | 2.20582 | 1.38113  | -5.01987 |
| H  | -1.23828 | 5.40387  | -3.18944 | C  | 5.6733  | -0.08003 | -2.24156 |
| H  | -0.79563 | 7.3106   | -1.65713 | H  | 6.2807  | -0.02804 | -3.15285 |
| C  | 1.51128  | 1.61458  | 2.1609   | H  | 6.11192 | 0.60902  | -1.50791 |
| C  | 1.29813  | 0.59974  | 3.10345  | H  | 5.7727  | -1.09024 | -1.82411 |
| C  | 2.4027   | 2.65766  | 2.47021  | N  | 1.93129 | 0.2942   | -1.84149 |
| C  | 1.94845  | 0.64486  | 4.33134  | Cl | 0.17539 | -1.8068  | 0.93669  |
| H  | 0.6369   | -0.2275  | 2.8475   |    |         |          |          |
| C  | 3.05618  | 2.68781  | 3.69345  |    |         |          |          |
| H  | 2.58635  | 3.4341   | 1.72656  |    |         |          |          |
| C  | 2.82618  | 1.68227  | 4.63194  |    |         |          |          |
| H  | 1.7716   | -0.14649 | 5.05871  |    |         |          |          |
| H  | 3.74454  | 3.50112  | 3.91908  |    |         |          |          |
| H  | 3.33269  | 1.70993  | 5.59568  |    |         |          |          |
| C  | 3.22271  | -1.77648 | 0.10762  |    |         |          |          |

**88**

**Me<sup>e</sup>TS<sub>Cl<sup>+</sup>-D<sup>+</sup></sub>(6)**

|   |          |          |          |
|---|----------|----------|----------|
| C | -3.72278 | -0.64982 | -1.05313 |
| C | -4.07675 | 0.54522  | -1.70509 |
| C | -3.12383 | 1.44806  | -2.13821 |
| C | -1.79389 | 1.20691  | -1.77817 |
| C | -1.42542 | 0.07598  | -1.0525  |

|    |          |          |          |   |          |          |          |
|----|----------|----------|----------|---|----------|----------|----------|
| C  | -2.37238 | -0.93783 | -0.79041 | H | -4.96296 | 2.63754  | 2.23777  |
| H  | -3.39734 | 2.35314  | -2.67805 | H | -5.48827 | 0.61116  | 3.57792  |
| H  | -1.03852 | 1.95044  | -2.03019 | C | 0.55735  | 3.28704  | 0.40224  |
| C  | -4.96866 | -1.22178 | -0.53508 | C | 0.13067  | 4.28281  | 1.29811  |
| C  | -6.1034  | -0.30609 | -1.07533 | C | 1.36594  | 3.64953  | -0.67883 |
| O  | -5.17528 | -2.14724 | 0.2176   | C | 0.50291  | 5.60411  | 1.10559  |
| O  | -7.29191 | -0.44399 | -0.9075  | H | -0.49168 | 3.99834  | 2.14699  |
| N  | -5.47157 | 0.69378  | -1.77836 | C | 1.7364   | 4.97416  | -0.86638 |
| C  | -6.1551  | 1.80446  | -2.38551 | H | 1.72415  | 2.89463  | -1.3772  |
| H  | -5.85787 | 2.75343  | -1.9179  | C | 1.30684  | 5.95502  | 0.02151  |
| H  | -5.94507 | 1.85798  | -3.46185 | H | 0.16661  | 6.36583  | 1.80736  |
| H  | -7.22753 | 1.64829  | -2.23383 | H | 2.37624  | 5.22721  | -1.70973 |
| C  | -1.83968 | -2.17573 | -0.20595 | H | 1.60187  | 6.99283  | -0.12477 |
| C  | -2.31608 | -3.48256 | -0.41461 | C | 4.03615  | -0.46842 | -0.65122 |
| C  | -1.63237 | -4.51616 | 0.22953  | C | 4.365    | -0.92731 | -1.93473 |
| C  | -0.03024 | -2.97147 | 1.04963  | C | 4.6355   | -2.26184 | -2.17641 |
| C  | -0.50457 | -4.27328 | 0.99517  | C | 4.50942  | -3.14262 | -1.10176 |
| H  | -1.98966 | -5.53706 | 0.09198  | C | 4.11828  | -2.71004 | 0.16283  |
| H  | 0.9055   | -2.70912 | 1.54227  | C | 3.85965  | -1.35736 | 0.39985  |
| H  | 0.03081  | -5.07828 | 1.49207  | H | 4.89445  | -2.62257 | -3.16939 |
| C  | -3.42691 | -3.84519 | -1.34835 | H | 4.69616  | -4.20276 | -1.26524 |
| H  | -3.19983 | -4.80066 | -1.83708 | H | 3.98254  | -3.43241 | 0.96783  |
| H  | -4.38056 | -3.94769 | -0.81746 | C | 3.82859  | 0.97496  | -0.74487 |
| H  | -3.5673  | -3.09186 | -2.13188 | C | 3.91776  | 1.28748  | -2.26394 |
| N  | -0.6797  | -1.96947 | 0.46639  | O | 3.65738  | 1.81661  | 0.10618  |
| Rh | 0.25149  | -0.10031 | -0.02568 | O | 3.66935  | 2.34135  | -2.80433 |
| Cl | 1.17907  | -1.38887 | -1.90123 | N | 4.33201  | 0.11831  | -2.86547 |
| H  | 0.93837  | 1.21411  | -0.63128 | C | 4.32782  | -0.07887 | -4.29399 |
| C  | -0.71362 | 1.18503  | 1.28914  | H | 5.288    | -0.48309 | -4.63825 |
| C  | 0.09014  | 1.93909  | 0.63504  | H | 3.5159   | -0.76242 | -4.579   |
| C  | -1.95976 | 1.04153  | 2.00066  | H | 4.16017  | 0.89714  | -4.75857 |
| C  | -2.2688  | -0.09776 | 2.75563  | C | 3.36802  | -0.89568 | 1.7207   |
| C  | -2.94457 | 2.02836  | 1.828    | C | 4.22243  | -0.95279 | 2.83456  |
| C  | -3.52572 | -0.24242 | 3.32767  | C | 3.70753  | -0.54047 | 4.06003  |
| H  | -1.5194  | -0.88121 | 2.86771  | C | 1.64179  | -0.05825 | 2.98182  |
| C  | -4.20356 | 1.87218  | 2.39131  | C | 2.3981   | -0.09521 | 4.14339  |
| H  | -2.7101  | 2.89958  | 1.21554  | H | 4.34528  | -0.56114 | 4.94417  |
| C  | -4.49798 | 0.73787  | 3.14447  | H | 0.61794  | 0.31352  | 3.00152  |
| H  | -3.75668 | -1.13594 | 3.90473  | H | 1.96835  | 0.23566  | 5.08581  |

|   |         |          |         |
|---|---------|----------|---------|
| C | 5.64868 | -1.39899 | 2.71083 |
| H | 6.20608 | -1.16822 | 3.6264  |
| H | 5.73259 | -2.47923 | 2.53357 |
| H | 6.1523  | -0.90221 | 1.87174 |
| N | 2.10192 | -0.44478 | 1.78705 |

## 89

### P-TS<sub>C2-D</sub>(1)

|    |          |          |          |
|----|----------|----------|----------|
| C  | 1.097    | -0.27199 | 1.28931  |
| C  | 0.77785  | 0.40305  | 2.49754  |
| C  | 1.04034  | -0.20741 | 3.71884  |
| C  | 1.45965  | -1.54053 | 3.72414  |
| C  | 1.58888  | -2.27771 | 2.54671  |
| C  | 1.39375  | -1.66969 | 1.30026  |
| H  | 0.84792  | 0.30708  | 4.65906  |
| H  | 1.63486  | -2.03467 | 4.67855  |
| H  | 1.81749  | -3.33496 | 2.62641  |
| C  | -0.35031 | 1.93199  | 1.03722  |
| O  | -1.0132  | 2.93052  | 0.86365  |
| N  | 0.17345  | 1.62855  | 2.32023  |
| C  | -0.17905 | 2.46127  | 3.45352  |
| H  | 0.71267  | 2.70662  | 4.04359  |
| H  | -0.62649 | 3.37806  | 3.06457  |
| H  | -0.90898 | 1.94517  | 4.09484  |
| C  | 1.44474  | -2.29899 | -0.02749 |
| C  | 2.0366   | -3.54288 | -0.34356 |
| C  | 1.99378  | -3.95685 | -1.67257 |
| C  | 0.8966   | -1.94325 | -2.28532 |
| C  | 1.42343  | -3.16782 | -2.66047 |
| H  | 2.44735  | -4.91342 | -1.93431 |
| H  | 0.47213  | -1.233   | -2.99852 |
| H  | 1.40407  | -3.4819  | -3.70113 |
| C  | 2.7495   | -4.41005 | 0.64934  |
| H  | 3.46744  | -3.83123 | 1.24571  |
| H  | 2.06299  | -4.91128 | 1.34565  |
| H  | 3.30751  | -5.19743 | 0.1287   |
| N  | 0.90473  | -1.53501 | -1.01866 |
| Rh | 0.16797  | 0.49769  | -0.30916 |
| Cl | -0.36812 | 1.20329  | -2.6875  |

|   |          |          |          |
|---|----------|----------|----------|
| C | 2.29575  | 0.67261  | 0.3028   |
| C | 1.82286  | 1.80245  | -0.1356  |
| C | 3.50865  | -0.07745 | -0.03416 |
| C | 3.89769  | -0.17957 | -1.37443 |
| C | 4.2904   | -0.67281 | 0.96068  |
| C | 5.04698  | -0.8822  | -1.71434 |
| H | 3.27163  | 0.28542  | -2.13753 |
| C | 5.44734  | -1.36291 | 0.61639  |
| H | 3.98408  | -0.58587 | 2.00312  |
| C | 5.82035  | -1.47766 | -0.72064 |
| H | 5.33905  | -0.96669 | -2.75969 |
| H | 6.06059  | -1.81397 | 1.39529  |
| H | 6.72066  | -2.02874 | -0.98846 |
| C | 2.09243  | 3.16202  | -0.46724 |
| C | 3.29849  | 3.73007  | -0.00915 |
| C | 1.20667  | 3.94278  | -1.22645 |
| C | 3.61385  | 5.04175  | -0.3205  |
| H | 3.97652  | 3.11812  | 0.58591  |
| C | 1.53515  | 5.2565   | -1.52943 |
| H | 0.28306  | 3.49154  | -1.58338 |
| C | 2.73161  | 5.8099   | -1.08063 |
| H | 4.55062  | 5.47071  | 0.03206  |
| H | 0.84803  | 5.85602  | -2.12399 |
| H | 2.97892  | 6.84284  | -1.32125 |
| P | -2.12434 | -0.25718 | -0.12533 |
| C | -2.70446 | -0.41257 | 1.60833  |
| C | -1.97677 | -1.19118 | 2.51792  |
| C | -3.79375 | 0.32898  | 2.07987  |
| C | -2.35683 | -1.26008 | 3.85406  |
| H | -1.0951  | -1.74337 | 2.18887  |
| C | -4.16352 | 0.26694  | 3.41957  |
| H | -4.35832 | 0.96269  | 1.39792  |
| C | -3.45249 | -0.53294 | 4.30852  |
| H | -1.78024 | -1.87686 | 4.54233  |
| H | -5.01528 | 0.84925  | 3.76742  |
| H | -3.74644 | -0.58245 | 5.35587  |
| C | -2.30545 | -1.90206 | -0.90907 |
| C | -2.29274 | -1.93205 | -2.31056 |
| C | -2.32847 | -3.10343 | -0.19959 |

|   |          |          |          |    |          |          |          |
|---|----------|----------|----------|----|----------|----------|----------|
| C | -2.31384 | -3.14681 | -2.98353 | C  | -3.98085 | -2.35644 | 0.48643  |
| H | -2.23888 | -0.99603 | -2.87007 | C  | -3.583   | -3.37434 | 1.35154  |
| C | -2.32567 | -4.31862 | -0.88078 | C  | -1.31197 | -2.84044 | 0.92688  |
| H | -2.36014 | -3.09925 | 0.88894  | C  | -2.2417  | -3.65804 | 1.55238  |
| C | -2.32056 | -4.34333 | -2.2707  | H  | -4.35038 | -3.94762 | 1.87318  |
| H | -2.31014 | -3.15793 | -4.07254 | H  | -0.24351 | -2.99195 | 1.07267  |
| H | -2.34224 | -5.25025 | -0.31691 | H  | -1.91529 | -4.46603 | 2.20324  |
| H | -2.32512 | -5.29519 | -2.79977 | C  | -5.44694 | -2.06177 | 0.36013  |
| C | -3.44621 | 0.72166  | -0.92149 | H  | -5.63877 | -0.98525 | 0.27348  |
| C | -3.26111 | 2.07899  | -1.19129 | H  | -5.90508 | -2.55489 | -0.50884 |
| C | -4.67905 | 0.1202   | -1.20234 | H  | -5.97575 | -2.42554 | 1.25014  |
| C | -4.30257 | 2.82158  | -1.74107 | N  | -1.65864 | -1.83011 | 0.1365   |
| H | -2.31037 | 2.55396  | -0.96217 | Rh | -0.24311 | -0.05141 | -0.80983 |
| C | -5.71278 | 0.86672  | -1.75367 | Cl | -0.12703 | -1.52373 | -2.7555  |
| H | -4.83021 | -0.93812 | -0.98674 | C  | -1.69554 | 1.22068  | 0.35781  |
| C | -5.52259 | 2.21959  | -2.02583 | C  | -0.48065 | 1.63593  | 0.46153  |
| H | -4.15101 | 3.8784   | -1.95342 | C  | -2.87476 | 1.13552  | 1.21904  |
| H | -6.66786 | 0.39131  | -1.97191 | C  | -2.76067 | 0.5359   | 2.4776   |
| H | -6.33098 | 2.80457  | -2.46246 | C  | -4.10911 | 1.65915  | 0.8196   |

## 89

### P-TS<sub>C2-D</sub>(2)

|   |          |          |          |   |          |          |          |
|---|----------|----------|----------|---|----------|----------|----------|
| C | -2.16091 | 0.38106  | -1.31911 | H | -1.80046 | 0.11312  | 2.77601  |
| C | -2.19812 | 1.3238   | -2.36137 | C | -5.20449 | 1.59397  | 1.67107  |
| C | -3.34862 | 1.46219  | -3.13597 | H | -4.19695 | 2.11963  | -0.16397 |
| C | -4.39475 | 0.5643   | -2.93725 | C | -5.0869  | 0.98257  | 2.91813  |
| C | -4.31431 | -0.45534 | -1.98989 | H | -3.7676  | -0.02681 | 4.29179  |
| C | -3.19579 | -0.56064 | -1.15996 | H | -6.15747 | 2.01771  | 1.35811  |
| H | -3.40512 | 2.19938  | -3.93476 | H | -5.95048 | 0.92291  | 3.57864  |
| H | -5.27821 | 0.63183  | -3.56976 | C | 0.35887  | 2.70956  | 0.94731  |
| H | -5.11472 | -1.18736 | -1.94252 | C | 0.39825  | 3.90761  | 0.21714  |
| C | 0.16884  | 1.43636  | -2.07625 | C | 1.11401  | 2.61277  | 2.12288  |
| O | 1.25839  | 1.83546  | -2.41559 | C | 1.16441  | 4.97783  | 0.65723  |
| N | -1.00728 | 1.99736  | -2.59439 | H | -0.18083 | 3.97589  | -0.70392 |
| C | -0.91775 | 3.04871  | -3.58967 | C | 1.87618  | 3.68806  | 2.56055  |
| H | -1.66464 | 3.82659  | -3.38618 | H | 1.10002  | 1.69167  | 2.7034   |
| H | 0.08539  | 3.47663  | -3.53616 | C | 1.90675  | 4.87235  | 1.83037  |
| H | -1.07729 | 2.64933  | -4.60095 | H | 1.1818   | 5.90038  | 0.07894  |
| C | -2.9647  | -1.62084 | -0.1606  | H | 2.46309  | 3.59168  | 3.47281  |
|   |          |          |          | H | 2.51211  | 5.71035  | 2.17204  |
|   |          |          |          | P | 2.06661  | -0.63912 | -0.04477 |

|                               |          |          |          |    |          |          |          |
|-------------------------------|----------|----------|----------|----|----------|----------|----------|
| C                             | 3.11364  | -1.69259 | -1.11413 | C  | -4.57102 | 0.87989  | -2.68694 |
| C                             | 2.57474  | -2.8913  | -1.59828 | C  | -4.531   | -0.2282  | -1.84929 |
| C                             | 4.4221   | -1.34494 | -1.45623 | C  | -3.31882 | -0.61337 | -1.24648 |
| C                             | 3.34328  | -3.73467 | -2.38978 | H  | -3.48775 | 2.49151  | -3.63193 |
| H                             | 1.54344  | -3.15449 | -1.36483 | H  | -5.51624 | 1.15968  | -3.14869 |
| C                             | 5.18309  | -2.18568 | -2.2635  | H  | -5.45037 | -0.78009 | -1.69293 |
| H                             | 4.85337  | -0.41374 | -1.0911  | C  | 0.08672  | 1.5346   | -1.80169 |
| C                             | 4.64785  | -3.38242 | -2.726   | O  | 1.24097  | 1.77673  | -2.10194 |
| H                             | 2.91407  | -4.66411 | -2.76002 | N  | -1.00252 | 1.90187  | -2.59017 |
| H                             | 6.20138  | -1.90288 | -2.52607 | C  | -0.78037 | 2.65449  | -3.80937 |
| H                             | 5.24601  | -4.04029 | -3.35499 | H  | -1.11389 | 2.07224  | -4.67845 |
| C                             | 1.85906  | -1.66438 | 1.47431  | H  | -1.32087 | 3.61063  | -3.78567 |
| C                             | 0.99881  | -1.1779  | 2.46581  | H  | 0.29154  | 2.84513  | -3.89891 |
| C                             | 2.50233  | -2.88576 | 1.68668  | C  | -3.04898 | -1.75673 | -0.36253 |
| C                             | 0.78382  | -1.88823 | 3.63979  | C  | -3.98774 | -2.67247 | 0.15856  |
| H                             | 0.46368  | -0.24325 | 2.28883  | C  | -3.51907 | -3.6885  | 0.98762  |
| C                             | 2.27445  | -3.60847 | 2.85671  | C  | -1.30797 | -2.87012 | 0.75429  |
| H                             | 3.18109  | -3.27917 | 0.93075  | C  | -2.17249 | -3.80755 | 1.29098  |
| C                             | 1.41705  | -3.11385 | 3.83391  | H  | -4.23636 | -4.3998  | 1.3978   |
| H                             | 0.10613  | -1.49417 | 4.39641  | H  | -0.24043 | -2.9008  | 0.96161  |
| H                             | 2.77544  | -4.56415 | 3.00409  | H  | -1.79301 | -4.60019 | 1.93049  |
| H                             | 1.24222  | -3.68135 | 4.74662  | C  | -5.45903 | -2.60564 | -0.11713 |
| C                             | 3.25363  | 0.62989  | 0.55832  | H  | -5.88878 | -1.64034 | 0.18115  |
| C                             | 3.41501  | 1.80641  | -0.18009 | H  | -5.68695 | -2.75783 | -1.18029 |
| C                             | 4.0451   | 0.4216   | 1.69344  | H  | -5.98378 | -3.38827 | 0.4432   |
| C                             | 4.34992  | 2.75765  | 0.21562  | N  | -1.73058 | -1.88125 | -0.03273 |
| H                             | 2.80032  | 1.97319  | -1.06363 | Rh | -0.44761 | -0.29301 | -0.73087 |
| C                             | 4.97315  | 1.37944  | 2.08858  | Cl | 0.0066   | -1.74259 | -2.70697 |
| H                             | 3.94297  | -0.49446 | 2.27416  | C  | -1.07734 | 1.06955  | 0.62259  |
| C                             | 5.12616  | 2.54992  | 1.35097  | C  | -0.34954 | 1.92652  | -0.0375  |
| H                             | 4.4599   | 3.6735   | -0.36332 | C  | -2.08524 | 0.98598  | 1.65149  |
| H                             | 5.58314  | 1.20533  | 2.97401  | C  | -2.07199 | -0.03617 | 2.61049  |
| H                             | 5.85343  | 3.29884  | 1.66215  | C  | -3.14502 | 1.90687  | 1.65272  |
|                               |          |          |          | C  | -3.08791 | -0.132   | 3.55099  |
|                               |          |          |          | H  | -1.26036 | -0.76257 | 2.59382  |
|                               |          |          |          | C  | -4.16094 | 1.80406  | 2.59289  |
|                               |          |          |          | H  | -3.16301 | 2.68578  | 0.89009  |
|                               |          |          |          | C  | -4.13575 | 0.78613  | 3.54408  |
|                               |          |          |          | H  | -3.06607 | -0.93231 | 4.28908  |
| <b>89</b>                     |          |          |          |    |          |          |          |
| <b>P-TS<sub>C2-D(3)</sub></b> |          |          |          |    |          |          |          |
| C                             | -2.19082 | 0.16291  | -1.51687 |    |          |          |          |
| C                             | -2.22886 | 1.26467  | -2.36452 |    |          |          |          |
| C                             | -3.43236 | 1.63756  | -2.95818 |    |          |          |          |

|   |          |          |          |   |         |          |          |
|---|----------|----------|----------|---|---------|----------|----------|
| H | -4.98225 | 2.51868  | 2.57983  | C | 2.89897 | -4.07511 | 2.51002  |
| H | -4.93675 | 0.7044   | 4.27702  | H | 3.00134 | -1.94129 | 2.76264  |
| C | 0.26542  | 3.20727  | 0.34079  | C | 2.07251 | -4.85807 | 0.38785  |
| C | 0.14885  | 3.56593  | 1.69521  | H | 1.47729 | -3.33201 | -1.01972 |
| C | 0.86911  | 4.11825  | -0.53422 | C | 2.56968 | -5.12648 | 1.66159  |
| C | 0.60004  | 4.79504  | 2.15077  | H | 3.29888 | -4.27787 | 3.50276  |
| H | -0.27865 | 2.85295  | 2.39902  | H | 1.81751 | -5.67592 | -0.28425 |
| C | 1.33002  | 5.34386  | -0.06934 | H | 2.70444 | -6.15592 | 1.99044  |
| H | 1.00987  | 3.85718  | -1.57961 |   |         |          |          |
| C | 1.19679  | 5.69277  | 1.27072  |   |         |          |          |
| H | 0.50337  | 5.04087  | 3.20769  |   |         |          |          |
| H | 1.80071  | 6.03359  | -0.76831 |   |         |          |          |
| H | 1.56396  | 6.65343  | 1.62853  |   |         |          |          |
| P | 1.92049  | -0.80061 | 0.1275   |   |         |          |          |
| C | 2.36112  | 0.37549  | 1.46225  |   |         |          |          |
| C | 3.165    | 1.48884  | 1.19839  |   |         |          |          |
| C | 1.75117  | 0.26961  | 2.71869  |   |         |          |          |
| C | 3.39614  | 2.44203  | 2.18553  |   |         |          |          |
| H | 3.60087  | 1.61754  | 0.20772  |   |         |          |          |
| C | 1.99272  | 1.21536  | 3.70885  |   |         |          |          |
| H | 1.08872  | -0.57201 | 2.93157  |   |         |          |          |
| C | 2.82491  | 2.30079  | 3.44529  |   |         |          |          |
| H | 4.01284  | 3.31051  | 1.95851  |   |         |          |          |
| H | 1.52518  | 1.10597  | 4.68665  |   |         |          |          |
| H | 3.00752  | 3.04882  | 4.21574  |   |         |          |          |
| C | 3.36911  | -0.70714 | -1.00565 |   |         |          |          |
| C | 4.65797  | -0.8906  | -0.48645 |   |         |          |          |
| C | 3.20557  | -0.51205 | -2.37692 |   |         |          |          |
| C | 5.7659   | -0.85809 | -1.32194 |   |         |          |          |
| H | 4.79704  | -1.05746 | 0.58275  |   |         |          |          |
| C | 4.32057  | -0.48734 | -3.21248 |   |         |          |          |
| H | 2.20753  | -0.39957 | -2.79317 |   |         |          |          |
| C | 5.59654  | -0.65463 | -2.69044 |   |         |          |          |
| H | 6.76267  | -0.99716 | -0.90553 |   |         |          |          |
| H | 4.18205  | -0.33879 | -4.28215 |   |         |          |          |
| H | 6.46443  | -0.63407 | -3.34842 |   |         |          |          |
| C | 2.21517  | -2.48022 | 0.82415  |   |         |          |          |
| C | 2.72708  | -2.75684 | 2.09363  |   |         |          |          |
| C | 1.89437  | -3.54522 | -0.03072 |   |         |          |          |
